# Supplementary material for: Natural double-stranded RNA mediates plant defence against insect herbivores
Source: Research Square preprint supplement (doi:10.21203/rs.3.rs-8904826/v1), 2026-02-19
Supplement: Supplementary file 1 [file 0f3ebfe4df3297fb9fdcacb9.xlsx]

## Sheet: Fig.1b
position	sense	antisense
1	0.58059	0
2	0.78312	0
3	4.07764	0
4	4.4692	0
5	4.60422	0
6	5.52237	0
7	5.67089	0
8	5.77891	0
9	5.98144	0
10	7.23714	0
11	7.81773	0
12	18.3089	0
13	32.027	-0.027004
14	33.9578	-0.027004
15	39.1832	-0.027004
16	40.5874	-0.040506
17	40.6954	-0.040506
18	40.7494	-0.067511
19	40.7899	-0.067511
20	41.0599	-0.135021
21	41.1005	-0.135021
22	42.1266	-0.148523
23	43.3283	-0.148523
24	43.9494	-0.148523
25	46.0962	-0.175528
26	46.2043	-0.175528
27	46.7983	-0.202532
28	48.7832	-0.216034
29	52.3612	-0.216034
30	56.1823	-0.229536
31	57.9241	-0.229536
32	58.1131	-0.229536
33	58.7207	-0.25654
34	58.9232	-0.270042
35	60.9891	-0.324051
36	61.1646	-0.324051
37	61.2321	-0.324051
38	61.9207	-0.324051
39	62.9739	-0.324051
40	68.0507	-0.337553
41	68.6853	-0.337553
42	69.968	-0.351055
43	70.0355	-0.351055
44	70.0355	-0.351055
45	70.049	-0.351055
46	70.13	-0.351055
47	70.3055	-0.351055
48	70.319	-0.364557
49	70.319	-0.364557
50	70.3595	-0.391561
51	70.3595	-0.405064
52	70.3595	-0.405064
53	70.3865	-0.405064
54	70.4	-0.405064
55	70.4136	-0.405064
56	70.4271	-0.418566
57	70.4271	-0.418566
58	70.4541	-0.418566
59	70.4811	-0.418566
60	70.6026	-0.418566
61	70.6161	-0.418566
62	70.6161	-0.418566
63	70.6701	-0.418566
64	70.6701	-0.418566
65	70.6701	-0.418566
66	70.6701	-0.418566
67	70.6836	-0.418566
68	70.6836	-0.418566
69	70.6836	-0.418566
70	70.6836	-0.418566
71	70.6836	-0.418566
72	70.6836	-0.418566
73	70.7241	-0.418566
74	70.7376	-0.418566
75	70.8186	-0.418566
76	71.0346	-0.418566
77	71.8448	-0.418566
78	72.0878	-0.418566
79	72.1553	-0.418566
80	72.2363	-0.418566
81	72.2633	-0.418566
82	72.3174	-0.418566
83	73.492	-0.418566
84	73.7216	-0.418566
85	73.8161	-0.418566
86	73.8161	-0.418566
87	73.8161	-0.432068
88	73.8161	-0.432068
89	73.8296	-0.432068
90	73.9511	-0.432068
91	73.9781	-0.432068
92	74.0456	-0.432068
93	74.2617	-0.432068
94	74.6262	-0.432068
95	74.7477	-0.432068
96	74.7612	-0.432068
97	74.7612	-0.44557
98	74.7747	-0.44557
99	74.7747	-0.44557
100	74.7747	-0.486076
101	74.2076	-1.10717
102	74.0051	-2.13334
103	70.7106	-2.68692
104	70.319	-3.30802
105	70.184	-3.44304
106	69.2659	-3.53755
107	69.1173	-3.57806
108	69.0228	-3.59156
109	68.8203	-3.63207
110	67.5916	-3.65907
111	69.0903	-3.65907
112	58.6262	-3.65907
113	44.908	-3.63207
114	42.9772	-3.63207
115	37.7519	-3.63207
116	36.3612	-3.61857
117	36.2802	-3.61857
118	36.2262	-3.60507
119	36.1857	-3.61857
120	35.9156	-3.55106
121	35.8751	-3.55106
122	34.8625	-3.53755
123	33.6608	-3.53755
124	33.0397	-3.53755
125	30.8928	-3.51055
126	30.7848	-3.51055
127	30.1907	-3.48355
128	28.2059	-3.47004
129	24.6279	-3.47004
130	20.8068	-3.45654
131	19.065	-3.45654
132	18.876	-3.45654
133	18.2684	-3.42954
134	18.0793	-3.41604
135	16.0135	-3.36203
136	15.838	-3.36203
137	15.7705	-3.36203
138	15.0819	-3.36203
139	14.0287	-3.36203
140	8.95191	-3.34853
141	8.31731	-3.34853
142	7.0346	-3.33502
143	6.96709	-3.33502
144	6.96709	-3.34853
145	6.95359	-3.34853
146	6.87258	-3.34853
147	6.71055	-3.34853
148	6.69705	-3.33502
149	6.69705	-3.34853
150	6.65655	-3.32152
151	6.65655	-3.30802
152	6.67005	-3.30802
153	6.64304	-3.30802
154	6.62954	-3.30802
155	6.61604	-3.30802
156	6.60254	-3.29452
157	6.60254	-3.29452
158	6.57553	-3.29452
159	6.54853	-3.29452
160	6.42701	-3.29452
161	6.41351	-3.29452
162	6.41351	-3.29452
163	6.3595	-3.29452
164	6.3595	-3.29452
165	6.3595	-3.29452
166	6.3595	-3.29452
167	6.346	-3.30802
168	6.346	-3.32152
169	6.346	-3.32152
170	6.346	-3.32152
171	6.346	-3.32152
172	6.346	-3.32152
173	6.30549	-3.32152
174	6.29199	-3.32152
175	6.21098	-3.32152
176	5.99494	-3.32152
177	5.18481	-3.32152
178	4.94178	-3.32152
179	4.87427	-3.32152
180	4.79325	-3.32152
181	4.76625	-3.32152
182	4.71224	-3.32152
183	3.53756	-3.32152
184	3.32152	-3.32152
185	3.22701	-3.32152
186	3.22701	-3.32152
187	3.22701	-3.30802
188	3.22701	-3.30802
189	3.2135	-3.34853
190	3.09199	-3.34853
191	3.06498	-3.34853
192	2.99747	-3.34853
193	2.79494	-3.34853
194	2.44388	-3.36203
195	2.33587	-3.36203
196	2.33587	-3.36203
197	2.34937	-3.34853
198	2.33587	-3.34853
199	2.59241	-3.34853
200	3.1595	-3.30802
201	4.36118	-2.68692
202	4.72574	-1.67426
203	4.76625	-1.13418
204	4.82026	-0.526583
205	4.82026	-0.391561
206	4.83376	-0.297047
207	4.86076	-0.25654
208	5.18481	-0.243038
209	5.19832	-0.202532
210	5.21182	-0.175528
211	3.74009	-0.175528
212	4.23967	-0.175528
213	4.77975	-0.175528
214	5.00929	-0.175528
215	5.04979	-0.175528
216	5.04979	-0.175528
217	5.1038	-0.175528
218	5.1038	-0.162025
219	5.13081	-0.148523
220	5.13081	-0.162025
221	5.18481	-0.202532
222	5.18481	-0.229536
223	5.22532	-0.243038
224	5.25232	-0.243038
225	5.30633	-0.243038
226	5.63038	-0.243038
227	5.69789	-0.270042
228	5.77891	-0.283545
229	6.11646	-0.310549
230	6.48102	-0.310549
231	6.76456	-0.310549
232	7.27764	-0.324051
233	8.56034	-0.324051
234	11.2608	-0.337553
235	12.2329	-0.337553
236	12.5435	-0.337553
237	12.584	-0.378059
238	12.6245	-0.391561
239	12.638	-0.391561
240	12.665	-0.391561
241	12.665	-0.391561
242	12.665	-0.391561
243	12.665	-0.391561
244	12.719	-0.378059
245	12.8135	-0.378059
246	12.827	-0.378059
247	12.8135	-0.391561
248	12.935	-0.418566
249	12.935	-0.486076
250	13.1511	-0.486076
251	13.1511	-0.499578
252	13.1376	-0.513081
253	13.2861	-0.513081
254	13.5021	-0.540085
255	13.7722	-0.540085
256	13.7857	-0.540085
257	13.7857	-0.540085
258	13.7857	-0.540085
259	13.7857	-0.580591
260	13.7857	-0.580591
261	13.8397	-0.594093
262	13.8397	-0.783123
263	13.8667	-1.13418
264	13.8802	-1.14768
265	13.8802	-1.16118
266	13.9207	-1.17468
267	13.9207	-1.2557
268	13.9612	-1.2827
269	14.1232	-1.39072
270	14.2042	-1.39072
271	14.2447	-1.39072
272	14.2717	-1.39072
273	14.3393	-1.39072
274	14.3393	-1.39072
275	14.3528	-1.39072
276	14.5823	-1.39072
277	14.6498	-1.39072
278	14.8118	-1.39072
279	15.2034	-1.39072
280	15.5004	-1.44473
281	15.784	-1.49873
282	16.9182	-1.51224
283	17.9713	-1.72827
284	21.4414	-1.72827
285	21.5764	-1.86329
286	21.6844	-1.8903
287	21.7384	-1.8903
288	21.8194	-1.9173
289	22.7241	-1.87679
290	22.8591	-1.87679
291	22.8591	-1.87679
292	23.0076	-1.87679
293	22.9941	-1.87679
294	22.9806	-1.87679
295	22.9806	-1.87679
296	23.0076	-2.24135
297	22.9941	-2.44388
298	23.0481	-2.5384
299	22.7916	-2.60591
300	22.2515	-2.63291
301	21.3874	-2.64642
302	21.1443	-2.63291
303	21.2388	-2.61941
304	21.3604	-2.61941
305	21.3874	-2.61941
306	21.3874	-2.61941
307	21.3739	-2.61941
308	21.0768	-2.61941
309	21.1038	-2.61941
310	21.0768	-2.61941
311	20.4692	-2.61941
312	19.9426	-2.63291
313	19.5646	-2.63291
314	19.4025	-2.63291
315	19.4836	-2.63291
316	19.4701	-2.63291
317	19.389	-2.64642
318	19.4431	-2.64642
319	19.4431	-2.64642
320	19.4971	-2.63291
321	19.4431	-2.59241
322	19.4431	-2.5654
323	19.416	-2.5519
324	19.389	-2.5519
325	19.3485	-2.5654
326	19.0245	-2.5654
327	18.9705	-2.5654
328	18.8895	-2.5519
329	18.5519	-2.5384
330	18.1874	-2.5384
331	17.9038	-2.5384
332	17.3907	-2.5384
333	16.1215	-2.5654
334	13.4211	-2.5519
335	12.449	-2.5519
336	12.1384	-2.5519
337	12.0979	-2.51139
338	12.0574	-2.49789
339	12.0439	-2.49789
340	12.0169	-2.51139
341	12.0169	-2.51139
342	12.0169	-2.5384
343	12.0169	-2.5384
344	11.9629	-2.5519
345	11.8684	-2.5519
346	11.8549	-2.5519
347	11.8549	-2.5384
348	11.7333	-2.51139
349	11.7468	-2.44388
350	11.5308	-2.44388
351	11.5308	-2.43038
352	11.5443	-2.41688
353	11.3958	-2.41688
354	11.1798	-2.38987
355	10.9097	-2.38987
356	10.9097	-2.38987
357	11.0987	-2.38987
358	11.5308	-2.38987
359	11.5713	-2.34937
360	11.6658	-2.36287
361	11.6928	-2.34937
362	11.7738	-2.16034
363	11.8279	-1.80928
364	11.9899	-1.79578
365	12.1249	-1.78228
366	12.2869	-1.76878
367	12.4895	-1.67426
368	12.557	-1.63376
369	12.476	-1.52574
370	12.53	-1.53924
371	12.7595	-1.53924
372	12.773	-1.53924
373	12.719	-1.53924
374	12.719	-1.53924
375	12.7055	-1.53924
376	12.476	-1.53924
377	12.4084	-1.53924
378	12.2464	-1.53924
379	11.8549	-1.53924
380	11.5713	-1.48523
381	11.2878	-1.43122
382	10.1671	-1.41772
383	9.11393	-1.20169
384	5.63038	-1.20169
385	5.50887	-1.06667
386	6.02195	-1.03966
387	5.99494	-1.03966
388	5.91393	-1.01266
389	5.00929	-1.01266
390	4.87427	-1.01266
391	4.87427	-1.36371
392	5.04979	-1.36371
393	9.42448	-1.36371
394	15.2304	-1.35021
395	15.757	-1.35021
396	23.3857	-0.985655
397	29.8262	-0.783123
398	32.027	-0.688608
399	32.081	-0.621097
400	32.1485	-0.594093
401	31.8245	-0.715612
402	31.9325	-0.729114
403	31.838	-0.756119
404	31.7165	-0.742617
405	31.6895	-0.742617
406	31.676	-0.742617
407	31.6625	-0.742617
408	31.622	-0.756119
409	31.6895	-0.756119
410	31.757	-0.810127
411	31.757	-0.810127
412	31.838	-0.796625
413	31.757	-0.810127
414	31.838	-0.810127
415	31.9865	-0.810127
416	32.027	-0.810127
417	32.0675	-0.796625
418	32.027	-0.796625
419	32	-0.796625
420	31.9595	-0.796625
421	32.4591	-0.810127
422	32.7426	-0.810127
423	32.9317	-0.810127
424	33.4447	-0.810127
425	33.4312	-0.796625
426	33.4312	-0.796625
427	33.6338	-0.769621
428	35.4431	-0.769621
429	35.8076	-0.769621
430	36.1047	-0.769621
431	39.7772	-0.769621
432	40.0473	-0.756119
433	40.6819	-0.729114
434	43.4228	-0.729114
435	43.9494	-0.729114
436	44.0034	-0.729114
437	44.368	-0.729114
438	44.368	-0.729114
439	45.2861	-0.742617
440	45.3941	-0.729114
441	45.4616	-0.729114
442	45.5967	-0.70211
443	45.5967	-0.70211
444	45.6372	-0.688608
445	45.6372	-0.688608
446	45.6372	-0.688608
447	45.8532	-0.688608
448	45.9477	-0.688608
449	46.0017	-0.675106
450	46.0152	-0.675106
451	46.0152	-0.675106
452	46.0152	-0.675106
453	46.0287	-0.675106
454	46.0557	-0.675106
455	46.5013	-0.675106
456	46.5283	-0.688608
457	46.3393	-0.688608
458	45.9207	-0.688608
459	45.9207	-0.999157
460	46.6768	-0.999157
461	47.1494	-0.999157
462	47.9865	-0.999157
463	48.9992	-0.999157
464	48.8642	-0.999157
465	48.8237	-0.999157
466	48.8912	-1.03966
467	49.8768	-1.03966
468	52.6718	-1.08017
469	53.0228	-1.13418
470	53.9005	-1.13418
471	54.076	-1.13418
472	54.292	-1.13418
473	54.7646	-1.13418
474	55.0751	-1.13418
475	55.2642	-1.13418
476	55.3992	-1.13418
477	55.5747	-1.17468
478	55.7232	-1.18819
479	55.8448	-1.18819
480	55.9528	-1.18819
481	56.1148	-1.20169
482	56.6549	-1.22869
483	56.7494	-1.22869
484	57.087	-1.22869
485	58.0186	-1.22869
486	57.6405	-1.22869
487	58.0726	-1.22869
488	58.5317	-1.22869
489	59.4903	-1.22869
490	61.5832	-1.24219
491	62.2988	-0.89114
492	62.1908	-0.904642
493	58.2481	-1.48523
494	52.6448	-1.49873
495	52.1317	-1.49873
496	44.611	-1.52574
497	38.9401	-1.55274
498	37.1038	-1.56625
499	37.6844	-1.56625
500	38.427	-1.56625
501	39.5747	-1.43122
502	39.4127	-1.41772
503	39.4262	-1.39072
504	40.1148	-1.39072
505	40.3848	-1.40422
506	40.5334	-1.40422
507	40.6954	-1.40422
508	41.0464	-1.39072
509	41.1545	-1.39072
510	41.303	-1.33671
511	42.1131	-1.33671
512	42.1131	-1.33671
513	42.0321	-1.32321
514	42.3426	-1.32321
515	42.1671	-1.32321
516	42.1401	-1.32321
517	42.1401	-1.32321
518	42.1266	-1.32321
519	42.1266	-1.32321
520	42.1266	-1.32321
521	41.6405	-1.30971
522	41.357	-1.30971
523	41.168	-1.32321
524	40.6684	-1.32321
525	40.6819	-1.36371
526	40.7089	-1.41772
527	40.4929	-1.51224
528	38.6836	-1.51224
529	38.346	-1.49873
530	38.049	-1.56625
531	34.3899	-1.59325
532	34.1739	-1.59325
533	33.5528	-1.63376
534	30.7983	-1.63376
535	30.2718	-1.66076
536	30.2447	-1.67426
537	29.8802	-1.68776
538	29.9072	-1.75527
539	28.9891	-1.74177
540	28.8945	-1.74177
541	28.827	-1.74177
542	28.746	-1.74177
543	28.8	-1.75527
544	28.8	-1.75527
545	28.908	-1.76878
546	28.935	-1.76878
547	28.719	-1.76878
548	28.6245	-1.76878
549	28.5975	-1.76878
550	28.746	-1.76878
551	28.854	-1.76878
552	28.881	-1.76878
553	28.935	-1.76878
554	28.935	-1.76878
555	29.2996	-1.76878
556	29.3131	-1.76878
557	29.3401	-1.76878
558	29.6372	-1.76878
559	29.5966	-1.45823
560	28.773	-1.44473
561	28.3004	-1.44473
562	27.6118	-1.44473
563	26.5722	-1.44473
564	26.5722	-1.47173
565	26.9772	-1.49873
566	26.8017	-1.74177
567	25.8431	-1.8903
568	24.0743	-1.9038
569	24.5063	-1.87679
570	24.3308	-1.95781
571	24.1283	-1.95781
572	23.8988	-2.06582
573	23.4127	-2.06582
574	23.1561	-2.07933
575	22.9941	-2.07933
576	22.9266	-2.07933
577	22.7646	-2.05232
578	22.6566	-2.14684
579	22.535	-2.16034
580	22.4135	-2.18734
581	22.4	-2.18734
582	22.1705	-2.16034
583	22.5755	-2.16034
584	22.535	-2.16034
585	21.6034	-2.16034
586	21.3604	-2.17384
587	20.9553	-2.17384
588	20.4962	-2.17384
589	19.5376	-2.17384
590	17.4447	-2.16034
591	16.7426	-2.16034
592	16.5536	-2.14684
593	16.2025	-1.59325
594	16	-1.57975
595	15.9865	-1.59325
596	15.838	-1.56625
597	15.0684	-1.53924
598	14.6498	-1.52574
599	14.0152	-1.52574
600	13.1916	-1.52574
601	12.0169	-1.52574
602	12.1114	-1.52574
603	12.3949	-1.52574
604	13.6776	-1.52574
605	13.8667	-1.52574
606	14.0557	-1.53924
607	14.5013	-1.56625
608	14.8253	-1.56625
609	14.9063	-1.56625
610	15.73	-1.56625
611	15.0009	-1.56625
612	16.4996	-1.57975
613	17.1612	-1.57975
614	19.0515	-1.57975
615	19.5646	-1.57975
616	19.6321	-1.57975
617	19.5916	-1.59325
618	19.5916	-1.59325
619	19.5916	-1.59325
620	19.6321	-1.59325
621	19.6456	-1.62025
622	19.6456	-1.62025
623	19.7131	-1.60675
624	19.7266	-1.60675
625	19.7401	-1.56625
626	20.0912	-1.51224
627	20.2127	-1.43122
628	20.3882	-1.44473
629	20.4827	-1.44473
630	20.7393	-1.37722
631	20.7663	-1.35021
632	20.7393	-1.35021
633	20.9148	-1.30971
634	21.1038	-1.30971
635	21.3333	-1.2827
636	21.3874	-1.2692
637	21.4549	-1.2557
638	21.5224	-1.18819
639	21.8059	-1.18819
640	22.2515	-1.21519
641	23.8447	-1.21519
642	23.9933	-1.21519
643	24.1418	-1.20169
644	24.7629	-1.20169
645	26.4101	-1.18819
646	29.5156	-1.18819
647	29.9477	-1.20169
648	31.784	-1.20169
649	32.3376	-1.20169
650	32.3781	-1.20169
651	32.3106	-1.20169
652	32.2836	-1.20169
653	32.2836	-1.22869
654	32.3106	-1.2557
655	31.6085	-1.2557
656	31.703	-1.24219
657	31.838	-1.24219
658	31.6625	-1.2827
659	31.7435	-1.2962
660	31.865	-1.2962
661	31.973	-1.2962
662	31.9055	-1.2962
663	31.9595	-1.2962
664	31.9325	-1.57975
665	31.5004	-3.13249
666	31.4734	-3.02447
667	31.4059	-3.13249
668	30.4743	-3.09199
669	29.6777	-3.173
670	28.935	-3.09199
671	29.0701	-3.13249
672	29.2321	-3.02447
673	29.5831	-3.02447
674	29.5696	-3.01097
675	30.2582	-3.01097
676	30.6093	-3.01097
677	31.4734	-3.05148
678	33.7283	-3.36203
679	41.1005	-3.36203
680	44.3005	-3.34853
681	46.4473	-3.33502
682	46.2448	-3.33502
683	46.7038	-3.33502
684	50.4169	-3.33502
685	51.2675	-3.41604
686	51.8346	-3.45654
687	51.9967	-3.47004
688	52.0237	-3.51055
689	52.1992	-3.51055
690	52.5232	-3.51055
691	52.5232	-3.51055
692	52.5502	-3.51055
693	52.5502	-3.48355
694	53.2389	-3.48355
695	55.9258	-3.47004
696	65.4718	-3.47004
697	69.779	-3.48355
698	71.1832	-3.49705
699	72.3714	-3.53755
700	72.3714	-3.53755
701	72.4389	-3.60507
702	72.3849	-3.63207
703	72.4389	-3.65907
704	70.4541	-3.67258
705	70.0625	-3.74009
706	69.8735	-3.72659
707	69.3199	-3.8076
708	68.6853	-3.8481
709	68.4152	-3.95612
710	67.7131	-3.96962
711	72.3444	-3.98312
712	71.1022	-3.96962
713	70.8321	-3.96962
714	68.5503	-3.96962
715	75.0718	-3.96962
716	79.7435	-3.96962
717	83.1596	-3.95612
718	89.9106	-3.95612
719	105.641	-3.95612
720	107.463	-3.95612
721	108.206	-3.92912
722	113.148	-3.92912
723	122.829	-3.92912
724	145.242	-3.92912
725	154.451	-3.92912
726	181.158	-3.92912
727	186.923	-3.91561
728	217.168	-3.90211
729	230.819	-3.90211
730	235.139	-3.91561
731	246.994	-3.91561
732	253.3	-3.91561
733	255.487	-3.91561
734	259.079	-3.92912
735	262.414	-3.92912
736	266.464	-3.92912
737	266.856	-3.92912
738	267.274	-3.92912
739	273.715	-3.92912
740	282.883	-3.90211
741	297.303	-3.94262
742	302.069	-3.98312
743	313.128	-3.99663
744	315.058	-3.99663
745	323.713	-3.99663
746	324.915	-4.03713
747	329.87	-4.02363
748	333.786	-4.02363
749	342.697	-4.02363
750	411.882	-4.02363
751	414.596	-4.02363
752	427.599	-4.02363
753	434.215	-3.99663
754	443.113	-3.96962
755	443.302	-3.96962
756	455.318	-3.96962
757	490.316	-3.96962
758	490.64	-3.92912
759	491.666	-3.91561
760	494.461	-3.91561
761	510.043	-3.91561
762	528.257	-3.91561
763	596.078	-3.91561
764	673.823	-3.60507
765	682.249	-2.02532
766	693.523	-1.84979
767	699.666	-1.59325
768	706.984	-1.57975
769	712.331	-1.47173
770	741.091	-1.45823
771	853.766	-1.41772
772	956.828	-1.41772
773	1028	-1.41772
774	1124.2	-1.43122
775	1133	-1.43122
776	1149.15	-1.43122
777	1148.45	-1.37722
778	1146.15	-0.95865
779	1138.78	-0.945148
780	1135.58	-0.931646
781	1133.29	-0.945148
782	1133.17	-0.945148
783	1132.21	-0.945148
784	1128.2	-0.945148
785	1127.33	-0.864136
786	1126.77	-0.810127
787	1126.55	-0.796625
788	1126.52	-0.756119
789	1126.35	-0.756119
790	1126.02	-0.756119
791	1126.01	-0.756119
792	1125.96	-0.756119
793	1125.87	-0.756119
794	1125.19	-0.756119
795	1122.49	-0.756119
796	1112.94	-0.756119
797	1108.63	-0.742617
798	1107.23	-0.729114
799	1106.04	-0.688608
800	1106.03	-0.688608
801	1105.96	-0.621097
802	1105.85	-0.594093
803	1105.46	-0.567089
804	1105.42	-0.553587
805	1105.35	-0.472574
806	1105.2	-0.472574
807	1105.15	-0.364557
808	1105.11	-0.324051
809	1105.08	-0.216034
810	1104.73	-0.202532
811	1100.02	-0.18903
812	1099.68	-0.18903
813	1099.29	-0.18903
814	1099.22	-0.18903
815	1092.09	-0.18903
816	1087.34	-0.18903
817	1083.92	-0.18903
818	1077.17	-0.18903
819	1061.44	-0.18903
820	1059.57	-0.18903
821	1058.8	-0.18903
822	1053.84	-0.18903
823	1044.08	-0.18903
824	1021.64	-0.18903
825	1012.4	-0.18903
826	985.317	-0.18903
827	979.43	-0.18903
828	949.01	-0.18903
829	935.238	-0.18903
830	930.661	-0.175528
831	918.765	-0.175528
832	912.433	-0.175528
833	910.043	-0.175528
834	906.262	-0.162025
835	902.698	-0.162025
836	898.566	-0.162025
837	898.107	-0.162025
838	897.594	-0.162025
839	890.87	-0.162025
840	881.243	-0.162025
841	865.229	-0.121519
842	860.261	-0.081013
843	849	-0.067511
844	846.407	-0.067511
845	835.997	-0.067511
846	831.663	-0.027004
847	826.276	-0.027004
848	820.524	-0.027004
849	811.018	-0.027004
850	741.631	-0.027004
851	738.876	-0.027004
852	725.86	-0.027004
853	719.177	-0.027004
854	710.225	-0.027004
855	709.928	-0.027004
856	697.763	-0.027004
857	662.603	-0.027004
858	662.144	-0.027004
859	661.037	-0.027004
860	658.093	-0.027004
861	642.323	-0.027004
862	623.946	-0.027004
863	556.017	-0.027004
864	478.259	-0.027004
865	469.766	-0.027004
866	458.424	-0.027004
867	452.118	-0.027004
868	444.598	-0.027004
869	439.183	-0.027004
870	410.329	-0.027004
871	297.276	-0.027004
872	194.025	-0.027004
873	122.505	-0.027004
874	26.2616	-0.013502
875	16.7426	-0.013502
876	0.17553	-0.013502
877	0	-0.013502
878	0.0135	-0.013502
879	0.0135	-0.013502
880	0.0135	-0.013502
881	0.0135	0
882	0.0135	0
883	0.0135	0
884	0.0135	0
885	0.0135	0
886	0.0135	0
887	0.0135	0
888	0.0135	0
889	0.0135	0
890	0.0135	0
891	0.0135	0
892	0.0135	0
893	0.0135	0
894	0.0135	0
895	0.0135	0
896	0.0135	0
897	0.0135	0
898	0.0135	0
899	0.0135	0
900	0.0135	0
901	0.0135	0
902	0.0135	0
903	0.0135	0
904	0.0135	0
905	0.0135	0
906	0.0135	0
907	0.0135	0
908	0.0135	0
909	0.0135	0
910	0.0135	0
911	0.0135	0
912	0.0135	0
913	0.0135	0
914	0.0135	0
915	0.0135	0
916	0.0135	0
917	0.0135	0
918	0.0135	0
919	0.0135	0
920	0.0135	0
921	0.0135	0
922	0.0135	0
923	0.0135	0
924	0.0135	0
925	0.0135	0
926	0.0135	0
927	0.0135	0
928	0.0135	-0.351055
929	0.0135	-0.783123
930	0.0135	-0.823629
931	0.0135	-1.20169
932	0.0135	-6.95359
933	0.0135	-8.62785
934	0.0135	-9.22195
935	0.0135	-9.22195
936	0.05401	-9.22195
937	0.05401	-9.22195
938	0.05401	-9.22195
939	0.05401	-9.22195
940	0.05401	-9.22195
941	0.08101	-9.22195
942	0.12152	-9.22195
943	0.14852	-9.22195
944	0.20253	-9.22195
945	0.21603	-9.22195
946	0.21603	-9.22195
947	0.22954	-9.22195
948	0.28355	-9.22195
949	0.97215	-9.22195
950	1.03966	-9.22195
951	1.09367	-9.22195
952	1.16118	-9.22195
953	1.18819	-9.22195
954	1.21519	-9.22195
955	1.2557	-9.22195
956	1.2827	-9.22195
957	1.32321	-9.22195
958	1.33671	-9.22195
959	1.52574	-9.23545
960	1.52574	-9.23545
961	1.59325	-9.23545
962	1.60675	-9.24895
963	1.63376	-9.24895
964	1.63376	-9.24895
965	1.63376	-9.24895
966	1.64726	-9.24895
967	1.64726	-9.24895
968	1.66076	-9.24895
969	1.68777	-9.24895
970	2.20085	-9.26245
971	2.28186	-9.28946
972	2.30886	-9.39748
973	2.43038	-9.68102
974	2.5384	-9.76203
975	2.60591	-9.77553
976	2.68692	-9.77553
977	2.86245	-9.84305
978	3.10549	-10.0051
979	3.2135	-10.0321
980	3.36203	-10.0321
981	3.40253	-10.0321
982	3.68608	-10.0321
983	4.09114	-10.0321
984	4.37469	-10.0321
985	4.60422	-10.0321
986	4.65823	-10.0456
987	4.96878	-10.0456
988	5.42785	-10.0456
989	5.7519	-10.0861
990	5.79241	-10.2211
991	5.85992	-10.2481
992	6.3595	-10.2886
993	6.88608	-10.3696
994	6.9806	-10.4371
995	7.04811	-10.4911
996	7.11562	-10.4911
997	7.29114	-10.4911
998	8.2903	-10.5046
999	9.08693	-10.5182
1000	9.99157	-10.5317
1001	10.0591	-10.5317
1002	10.9772	-10.5317
1003	11.1528	-10.5317
1004	11.7333	-10.5317
1005	21.1713	-10.5452
1006	22.7916	-10.5452
1007	23.1156	-10.5452
1008	23.4532	-10.5452
1009	24.4388	-10.5452
1010	25.3975	-10.5452
1011	25.4245	-10.5587
1012	25.492	-10.6667
1013	25.6135	-10.6802
1014	26.1131	-10.6802
1015	27.0717	-10.7072
1016	27.3688	-10.7207
1017	32.5266	-10.7207
1018	32.5266	-10.7342
1019	32.7426	-10.7612
1020	33.2152	-10.7612
1021	33.2557	-10.7612
1022	33.3907	-10.7612
1023	33.4988	-10.7612
1024	33.5798	-10.7612
1025	33.6608	-10.7612
1026	33.9983	-10.7612
1027	34.4304	-10.7612
1028	35.0515	-10.4101
1029	35.119	-9.97807
1030	35.4296	-9.93756
1031	35.4296	-9.5595
1032	35.4701	-3.8211
1033	35.9967	-2.14684
1034	36.2802	-1.55274
1035	37.3739	-1.55274
1036	38.8051	-1.55274
1037	39.0346	-1.55274
1038	39.1021	-1.55274
1039	41.6135	-1.55274
1040	43.8954	-1.55274
1041	46.5688	-1.55274
1042	47.568	-1.55274
1043	48	-1.55274
1044	48.0405	-1.55274
1045	48.3781	-1.55274
1046	49.1612	-1.56625
1047	49.1747	-1.57975
1048	49.1612	-1.59325
1049	48.5131	-1.59325
1050	48.4456	-1.59325
1051	48.3916	-1.59325
1052	48.3646	-1.59325
1053	48.5266	-1.60675
1054	48.6616	-1.64726
1055	48.7562	-1.64726
1056	48.8102	-1.64726
1057	48.7832	-1.64726
1058	48.7832	-1.66076
1059	48.7021	-1.64726
1060	48.7427	-1.64726
1061	48.6886	-1.67426
1062	49.0127	-1.67426
1063	49.1342	-1.67426
1064	49.5663	-1.72827
1065	49.7148	-1.75527
1066	49.8363	-1.78228
1067	50.2144	-1.78228
1068	51.1055	-1.78228
1069	53.0363	-1.84979
1070	54.5756	-1.9173
1071	54.8186	-1.9308
1072	55.7908	-1.82279
1073	56.9519	-1.53924
1074	58.4507	-1.45823
1075	58.9097	-1.47173
1076	58.9638	-1.47173
1077	58.8962	-1.41772
1078	58.7612	-1.2557
1079	58.6937	-1.22869
1080	58.6127	-1.22869
1081	58.6397	-1.22869
1082	58.6127	-1.22869
1083	58.3562	-1.22869
1084	58.3427	-1.22869
1085	58.8692	-1.22869
1086	61.7182	-1.24219
1087	65.0802	-1.2557
1088	65.0262	-1.2557
1089	64.7292	-1.21519
1090	64.9182	-1.08017
1091	64.9587	-1.05316
1092	64.5671	-1.01266
1093	64.1486	-0.931646
1094	64.0541	-0.864136
1095	64	-0.810127
1096	63.946	-0.823629
1097	64.3781	-0.877638
1098	64.2431	-0.877638
1099	64.4861	-0.877638
1100	67.3216	-0.931646
1101	67.2946	-1.51224
1102	66.4979	-1.63376
1103	66.7275	-1.9038
1104	66.579	-2.87595
1105	57.2085	-3.8211
1106	55.6017	-3.8346
1107	55.2777	-3.8481
1108	54.9536	-3.86161
1109	54.0085	-3.87511
1110	53.1038	-3.95612
1111	53.5089	-3.99663
1112	53.5494	-3.92912
1113	53.6034	-3.95612
1114	53.1443	-3.95612
1115	52.2532	-4.23966
1116	52.1452	-4.69874
1117	47.1224	-4.77975
1118	47.4059	-5.03629
1119	47.4735	-8.2768
1120	47.0819	-8.34431
1121	47.0549	-8.39832
1122	47.73	-8.65486
1123	47.8515	-8.84389
1124	48.3106	-9.68102
1125	48.3376	-11.2068
1126	48.0675	-13.7722
1127	48.3106	-14.7713
1128	48.1621	-15.4194
1129	50.2954	-26.2886
1130	51.7536	-26.9637
1131	52.1182	-28.5435
1132	52.6718	-29.5696
1133	52.4827	-30.9063
1134	54.8726	-31.973
1135	55.0076	-32.7966
1136	53.9005	-34.6599
1137	53.9005	-38.8186
1138	53.9275	-42.2886
1139	51.4701	-44.9621
1140	49.2692	-46.3528
1141	46.6498	-49.1072
1142	45.7047	-49.6743
1143	45.6102	-49.8633
1144	45.5156	-50.5519
1145	45.2051	-51.5646
1146	44.476	-66.4169
1147	44.746	-68.6718
1148	44.8405	-74.6667
1149	44.9891	-75.4633
1150	45.3941	-77.0296
1151	45.5021	-80.5671
1152	46.3798	-81.0127
1153	47.0819	-81.3368
1154	47.1494	-82.4034
1155	47.0144	-86.0625
1156	46.9469	-87.1157
1157	47.3924	-89.9646
1158	47.3924	-98.876
1159	47.2844	-100.523
1160	47.2574	-101.158
1161	47.2439	-104.25
1162	46.9334	-104.614
1163	46.8659	-106.019
1164	46.5013	-108.004
1165	46.4068	-108.382
1166	46.5283	-108.436
1167	46.1502	-108.733
1168	45.2861	-109.813
1169	43.3688	-111.906
1170	41.3705	-113.944
1171	41.0464	-113.985
1172	40.0473	-114.025
1173	38.8321	-114.295
1174	38.427	-117.455
1175	37.9545	-143.703
1176	37.9815	-145.175
1177	38.211	-145.539
1178	38.184	-145.85
1179	38.157	-146.093
1180	38.13	-146.835
1181	38.0895	-147.916
1182	37.8869	-148.186
1183	37.7384	-148.213
1184	37.4819	-148.213
1185	36.8068	-148.213
1186	34.0658	-148.253
1187	30.4743	-148.24
1188	30.0692	-148.28
1189	30.0557	-148.294
1190	29.8262	-148.294
1191	29.7182	-148.294
1192	29.6101	-148.307
1193	29.5291	-148.334
1194	29.5291	-148.523
1195	29.5156	-149.158
1196	29.5021	-149.523
1197	28.8945	-150.981
1198	28.0304	-152.236
1199	27.0582	-164.334
1200	23.3722	-179.821
1201	23.3452	-179.97
1202	23.2236	-180.726
1203	22.9401	-180.645
1204	22.5485	-180.091
1205	22.481	-179.146
1206	22.508	-184.223
1207	22.508	-184.601
1208	22.5215	-184.588
1209	22.5485	-184.628
1210	22.8321	-184.56
1211	22.5215	-184.682
1212	22.4405	-184.722
1213	22.292	-184.776
1214	22.2515	-184.79
1215	22.184	-184.48
1216	21.995	-184.007
1217	21.8599	-184.061
1218	21.5899	-187.882
1219	21.3198	-185.128
1220	21.2658	-185.073
1221	21.3063	-185.438
1222	20.5232	-185.627
1223	20.3072	-185.465
1224	19.7806	-185.857
1225	19.6726	-184.79
1226	19.6186	-183.764
1227	18.9975	-182.9
1228	18.5249	-182.468
1229	16.3511	-174.002
1230	14.5958	-178.822
1231	14.3257	-178.039
1232	13.7317	-178.538
1233	13.4346	-177.202
1234	10.7747	-176.176
1235	9.546	-175.474
1236	9.20845	-173.732
1237	9.00591	-170.572
1238	9.22195	-168.547
1239	9.16794	-166.171
1240	9.08693	-164.874
1241	10.1401	-162.673
1242	10.0996	-162.147
1243	10.2076	-161.971
1244	10.6262	-161.553
1245	14.7578	-161.296
1246	16.3781	-146.768
1247	16.9587	-145.175
1248	17.3367	-141.057
1249	17.1747	-140.422
1250	16.9452	-138.977
1251	16.8371	-135.939
1252	16.1485	-135.615
1253	15.3924	-135.426
1254	15.6085	-134.346
1255	16.3916	-131.038
1256	20.8608	-130.093
1257	20.9418	-127.325
1258	21.0903	-118.414
1259	21.3198	-116.766
1260	21.3604	-116.213
1261	21.4684	-113.134
1262	21.5224	-112.878
1263	21.6979	-111.541
1264	21.6304	-109.543
1265	21.6844	-109.651
1266	21.4414	-109.732
1267	21.4414	-109.435
1268	21.5899	-108.355
1269	21.6979	-106.248
1270	21.6439	-104.493
1271	21.6979	-104.709
1272	21.6979	-104.925
1273	21.9544	-104.763
1274	20.8608	-102.94
1275	20.9013	-76.6785
1276	20.7933	-76.9351
1277	20.4557	-78.1773
1278	20.4152	-78.1638
1279	20.4557	-78.1638
1280	20.6582	-77.4752
1281	20.8878	-84.1587
1282	22.5755	-86.7646
1283	23.7637	-89.222
1284	24.5063	-91.4094
1285	25.249	-91.5174
1286	25.222	-91.6929
1287	27.0582	-91.7874
1288	27.5443	-91.8684
1289	27.8954	-91.9089
1290	27.9089	-91.9764
1291	27.9089	-91.9899
1292	27.9089	-92.0034
1293	27.9224	-92.0709
1294	28.0574	-92.098
1295	28.1519	-91.4769
1296	28.2734	-91.1393
1297	28.3545	-89.6541
1298	28.476	-88.3984
1299	29.1106	-76.368
1300	29.1106	-60.8135
1301	29.1376	-60.0844
1302	29.4481	-59.2203
1303	29.5561	-59.0313
1304	29.7452	-58.8962
1305	29.7722	-59.1123
1306	29.8397	-54.7106
1307	29.8667	-55.1292
1308	30.1097	-58.2616
1309	30.2718	-67.9427
1310	31.622	-69.3739
1311	34.1739	-71.0346
1312	34.3764	-71.0076
1313	35.5241	-70.9131
1314	35.6321	-70.8996
1315	36.4692	-70.9401
1316	37.4954	-71.0482
1317	37.7114	-71.0482
1318	37.7249	-67.038
1319	37.7249	-66.795
1320	37.6979	-66.795
1321	37.6574	-66.4034
1322	37.8599	-65.9578
1323	37.9545	-65.9309
1324	37.9815	-64.7427
1325	38.049	-64.3241
1326	38.0895	-62.8119
1327	38.103	-62.7173
1328	38.481	-62.5013
1329	38.6296	-60.0979
1330	38.9806	-54.7511
1331	38.9671	-53.9545
1332	38.9806	-52.4962
1333	39.0751	-52.5637
1334	39.0886	-52.6043
1335	39.4802	-52.4827
1336	39.5612	-52.3612
1337	39.8853	-51.3621
1338	39.6827	-49.9578
1339	43.8684	-50.0659
1340	44.1789	-50.795
1341	43.2338	-55.4937
1342	44.341	-56.7089
1343	46.7578	-57.7216
1344	47.919	-57.7621
1345	44.557	-57.222
1346	43.6524	-57.357
1347	42.9637	-56.7764
1348	42.6127	-54.9266
1349	42.7207	-55.0211
1350	42.6127	-54.9131
1351	42.7477	-54.6701
1352	43.0583	-54.8051
1353	43.0853	-54.6836
1354	42.6802	-54.9266
1355	42.0726	-54.5756
1356	37.6169	-54.5216
1357	37.1308	-54.6701
1358	39.5747	-54.6566
1359	41.9916	-54.6566
1360	48.7156	-54.5756
1361	48.7291	-54.5351
1362	48.7697	-54.427
1363	48.5536	-54.373
1364	48.7562	-54.3325
1365	52.8338	-53.8195
1366	71.6017	-53.6574
1367	72.3309	-53.6574
1368	72.4119	-53.6574
1369	75.3283	-53.6169
1370	76.179	-53.2524
1371	87.9123	-52.9553
1372	101.495	-52.6988
1373	114.363	-52.5907
1374	117.671	-51.254
1375	118.265	-51.2405
1376	118.954	-49.5123
1377	119.129	-47.892
1378	119.818	-47.595
1379	123.639	-47.3519
1380	124.057	-47.3654
1381	140.733	-39.6152
1382	145.094	-36.7663
1383	154.437	-34.3089
1384	155.504	-32.1486
1385	155.477	-32.0405
1386	157.232	-31.811
1387	158.326	-31.73
1388	164.726	-31.6085
1389	165.36	-31.5544
1390	170.181	-31.4869
1391	175.379	-31.4734
1392	175.825	-31.4599
1393	176.324	-31.3654
1394	176.567	-31.1629
1395	176.594	-31.1629
1396	176.594	-31.1224
1397	177.188	-31.0954
1398	177.418	-31.0954
1399	176.864	-31.0144
1400	177.58	-31.0144
1401	177.971	-31.0144
1402	177.755	-31.0009
1403	177.539	-31.0009
1404	177.35	-30.7173
1405	177.35	-30.4878
1406	177.31	-29.7992
1407	177.499	-28.989
1408	177.256	-25.8566
1409	177.134	-16.1215
1410	175.514	-14.6903
1411	173.205	-12.881
1412	173.678	-12.827
1413	172.665	-12.827
1414	172.625	-12.827
1415	171.909	-12.7865
1416	171.247	-12.6785
1417	171.733	-12.5435
1418	174.285	-12.4625
1419	174.528	-12.1924
1420	174.582	-12.1789
1421	174.893	-12.1654
1422	175.649	-12.1654
1423	175.595	-12.1654
1424	175.663	-12.1249
1425	175.865	-12.0844
1426	176.203	-12.0574
1427	176.77	-12.0169
1428	176.405	-12.0439
1429	176.27	-12.0439
1430	175.987	-11.8954
1431	175.96	-11.9089
1432	176.095	-11.8279
1433	176	-11.7604
1434	176.068	-11.6793
1435	175.825	-11.6793
1436	176.554	-11.6928
1437	176.378	-11.6928
1438	176.351	-11.6928
1439	172.733	-11.2878
1440	173.205	-10.4776
1441	173.286	-5.22532
1442	172.409	-3.96962
1443	170.275	-2.94346
1444	169.56	-2.63291
1445	169.614	-2.41688
1446	168.966	-1.9443
1447	169.033	-1.84979
1448	168.898	-1.80928
1449	169.006	-1.55274
1450	169.762	-1.53924
1451	169.749	-1.2827
1452	169.209	-1.02616
1453	169.047	-0.999157
1454	169.047	-0.769621
1455	168.939	-0.769621
1456	169.033	-0.715612
1457	169.533	-0.486076
1458	166.927	-0.499578
1459	164.321	-0.499578
1460	157.543	-0.513081
1461	157.421	-0.513081
1462	157.313	-0.513081
1463	157.273	-0.499578
1464	157.138	-0.499578
1465	152.952	-0.499578
1466	134.171	-0.526583
1467	133.441	-0.526583
1468	133.185	-0.540085
1469	130.12	-0.526583
1470	129.283	-0.6346
1471	117.563	-0.648102
1472	104.101	-0.648102
1473	90.9773	-0.648102
1474	87.5747	-0.648102
1475	87.2102	-0.648102
1476	86.5621	-0.648102
1477	86.4271	-0.675106
1478	85.7385	-0.756119
1479	81.8633	-0.810127
1480	81.2287	-0.742617
1481	64.3106	-0.729114
1482	58.2751	-0.729114
1483	47.7435	-0.729114
1484	45.9207	-0.769621
1485	45.1241	-0.783123
1486	43.2338	-0.837131
1487	40.2228	-0.864136
1488	33.3367	-0.877638
1489	32.3376	-0.918144
1490	27.5173	-0.972153
1491	22.319	-1.01266
1492	21.9004	-1.01266
1493	21.4414	-1.01266
1494	21.1308	-0.999157
1495	21.0903	-0.999157
1496	21.0093	-0.999157
1497	20.4692	-0.999157
1498	20.3882	-0.985655
1499	20.7663	-0.985655
1500	20.4962	-0.985655
1501	20.2802	-0.985655
1502	20.2532	-0.985655
1503	20.5232	-0.985655
1504	20.5637	-0.985655
1505	21.2523	-0.985655
1506	21.3198	-0.985655
1507	21.1713	-0.985655
1508	21.2928	-0.985655
1509	22.0355	-0.985655
1510	22.292	-0.972153
1511	23.6557	-0.945148
1512	24.0878	-0.945148
1513	24.0608	-0.945148
1514	24.9789	-0.945148
1515	25.276	-0.945148
1516	26.9637	-0.945148
1517	27.5173	-0.945148
1518	25.0329	-0.945148
1519	24.7764	-0.945148
1520	24.7899	-0.945148
1521	25.168	-0.931646
1522	24.2633	-0.931646
1523	24.2093	-0.931646
1524	24.1013	-0.931646
1525	23.8312	-0.931646
1526	23.4397	-0.931646
1527	22.8051	-0.931646
1528	22.7916	-0.904642
1529	22.7511	-0.904642
1530	22.6701	-0.904642
1531	22.6161	-0.89114
1532	22.4675	-0.89114
1533	22.427	-0.89114
1534	22.3325	-0.89114
1535	22.184	-0.89114
1536	21.3469	-0.877638
1537	21.1713	-0.877638
1538	21.0903	-0.837131
1539	20.5232	-0.837131
1540	19.7401	-0.823629
1541	19.4701	-0.823629
1542	19.1865	-0.823629
1543	18.4304	-0.823629
1544	17.5663	-0.823629
1545	16.7021	-0.823629
1546	16.5806	-0.823629
1547	16.3241	-0.823629
1548	16.2971	-0.823629
1549	16.054	-0.823629
1550	15.2304	-0.823629
1551	15.1089	-0.823629
1552	15.1089	-0.823629
1553	15.1089	-0.823629
1554	15.0684	-0.783123
1555	15.0009	-0.783123
1556	14.8793	-0.783123
1557	14.3257	-0.783123
1558	14.3257	-0.769621
1559	14.2852	-0.769621
1560	14.2852	-0.756119
1561	14.2852	-0.756119
1562	14.2717	-0.742617
1563	14.2717	-0.742617
1564	14.2042	-0.742617
1565	14.2042	-0.742617
1566	14.2042	-0.715612
1567	14.2042	-0.715612
1568	14.1907	-0.70211
1569	14.1907	-0.70211
1570	14.1772	-0.594093
1571	14.1097	-0.580591
1572	13.9882	-0.580591
1573	13.9207	-0.580591
1574	13.9072	-0.580591
1575	13.5831	-0.580591
1576	13.4886	-0.580591
1577	13.4481	-0.553587
1578	13.3941	-0.472574
1579	13.3941	-0.418566
1580	13.3671	-0.418566
1581	13.3536	-0.418566
1582	13.2861	-0.391561
1583	13.2861	-0.364557
1584	13.2861	-0.297047
1585	13.2861	-0.283545
1586	13.2861	-0.216034
1587	13.2861	-0.175528
1588	13.2861	-0.162025
1589	13.2861	-0.121519
1590	13.2726	-0.067511
1591	13.2726	-0.027004
1592	13.2456	-0.013502
1593	13.1646	-0.013502
1594	13.0971	-0.013502
1595	13.016	0
1596	12.9755	0
1597	12.8405	0
1598	12.5705	0
1599	12.0439	0
1600	11.5443	0
1601	11.3283	0
1602	11.2608	0
1603	10.9772	0
1604	10.8962	0
1605	10.1806	0
1606	10.0456	0
1607	9.97807	0
1608	9.82954	0
1609	8.97891	0
1610	8.65486	0
1611	6.92659	0
1612	5.79241	0
1613	5.65739	0
1614	4.67173	0
1615	4.25317	0
1616	2.43038	0
1617	1.36371	-0.054008
1618	1.2827	-0.054008
1619	1.2827	-0.067511
1620	1.21519	-0.067511
1621	0.52658	-0.081013
1622	0.44557	-0.081013
1623	0.44557	-0.081013
1624	0.45907	-0.162025
1625	0.45907	-0.175528
1626	0.51308	-0.202532
1627	0.52658	-0.202532
1628	0.52658	-0.243038
1629	0.52658	-0.243038
1630	0.52658	-0.270042
1631	0.54009	-0.283545
1632	0.56709	-0.283545
1633	0.6076	-0.297047
1634	0.6616	-0.297047
1635	0.94515	-1.43122
1636	0.97215	-2.01182
1637	1.12068	-2.44388
1638	1.12068	-2.48439
1639	1.48523	-3.01097
1640	1.55274	-3.06498
1641	1.56625	-3.10549
1642	1.67426	-3.47004
1643	1.68777	-3.67258
1644	2.30886	-4.06414
1645	2.47089	-4.18566
1646	2.49789	-4.21266
1647	2.57891	-4.21266
1648	2.79494	-4.21266
1649	2.97047	-4.21266
1650	2.97047	-4.21266
1651	3.28102	-4.22616
1652	3.61857	-4.22616
1653	4.15865	-4.23966
1654	4.25317	-4.23966
1655	4.28017	-4.23966
1656	4.30718	-4.25317
1657	4.32068	-4.25317
1658	4.52321	-4.25317
1659	4.95528	-4.25317
1660	5.19832	-4.26667
1661	5.23882	-4.26667
1662	5.33334	-4.37469
1663	5.38735	-4.40169
1664	5.7249	-4.4287
1665	6.57553	-4.69874
1666	6.62954	-6.64304
1667	6.67005	-7.22363
1668	6.68355	-7.29114
1669	6.73756	-7.34515
1670	6.75106	-7.42617
1671	6.76456	-7.89874
1672	6.92659	-8.02026
1673	6.9806	-8.03376
1674	7.07511	-8.04726
1675	7.07511	-8.04726
1676	7.21013	-8.11477
1677	7.27764	-8.16878
1678	7.6422	-8.16878
1679	8.57385	-8.16878
1680	8.72237	-8.18228
1681	8.96541	-8.18228
1682	9.45148	-8.2633
1683	10.2751	-8.42532
1684	11.3823	-8.53334
1685	11.7874	-8.57385
1686	11.8954	-8.68186
1687	11.9359	-9.16794
1688	11.9494	-9.31646
1689	12.1114	-9.34347
1690	12.1654	-9.38397
1691	12.2464	-9.38397
1692	12.3544	-9.42448
1693	12.4355	-9.50549
1694	12.5435	-9.546
1695	12.611	-9.546
1696	12.9215	-9.546
1697	13.0295	-9.66752
1698	14.1232	-10.8422
1699	14.6903	-10.9502
1700	15.6625	-11.7333
1701	16.5131	-11.9494
1702	16.9317	-11.9629
1703	19.1325	-11.9899
1704	20.6852	-12.0169
1705	22.7241	-12.0169
1706	23.2777	-12.0169
1707	23.3857	-12.0169
1708	23.4532	-12.0169
1709	23.5072	-12.0169
1710	23.5747	-12.0979
1711	23.6422	-12.0979
1712	24.2363	-12.1114
1713	24.7629	-12.1114
1714	24.8979	-12.1114
1715	25.0059	-12.1114
1716	25.0869	-12.1114
1717	25.1409	-12.0574
1718	25.168	-12.0574
1719	25.168	-12.0574
1720	25.1815	-12.0574
1721	25.2355	-12.0844
1722	25.5325	-12.2194
1723	26.5182	-12.638
1724	27.6658	-12.557
1725	27.6658	-12.557
1726	27.6388	-12.53
1727	28.9891	-12.5705
1728	29.9477	-12.665
1729	30.0287	-12.6785
1730	30.0827	-12.881
1731	30.4878	-12.8675
1732	30.7038	-12.935
1733	30.9334	-12.9485
1734	30.9604	-12.989
1735	30.6768	-12.0979
1736	30.6903	-11.5848
1737	30.5553	-11.1662
1738	30.6228	-11.1527
1739	30.2582	-10.6532
1740	30.2177	-10.6667
1741	30.2177	-10.7882
1742	30.1367	-10.5857
1743	30.1232	-10.4371
1744	29.5021	-10.0456
1745	29.3401	-9.92406
1746	29.4346	-9.89705
1747	29.8397	-10.6937
1748	29.7047	-10.8152
1749	29.6507	-10.9637
1750	29.7182	-11.1122
1751	29.4481	-11.1258
1752	29.1241	-13.7857
1753	28.584	-13.9747
1754	28.746	-14.1907
1755	28.773	-14.2177
1756	28.9485	-14.5283
1757	30.1367	-14.5418
1758	30.4203	-14.7443
1759	30.5283	-14.7713
1760	30.3393	-15.2439
1761	31.7165	-26.0051
1762	33.4042	-27.3148
1763	33.5393	-31.919
1764	33.2557	-33.0802
1765	32.4051	-33.6608
1766	32.3511	-31.7975
1767	32.3376	-31.7435
1768	32.3376	-32
1769	32.4186	-32.135
1770	32.4726	-32.6751
1771	32.4726	-32.7831
1772	32.3106	-32.7966
1773	32.2836	-34.2279
1774	32.3781	-36.2802
1775	32.4456	-37.5089
1776	32.4726	-37.7249
1777	32.4591	-37.8734
1778	32.0945	-38.373
1779	31.1629	-38.4945
1780	31.0279	-38.562
1781	30.7848	-38.8051
1782	30.3123	-39.4127
1783	29.5021	-39.3182
1784	28.4085	-39.2777
1785	28.0034	-39.2642
1786	27.8954	-39.1561
1787	27.8549	-38.6701
1788	27.8549	-38.5215
1789	27.7334	-38.508
1790	27.7063	-38.4675
1791	27.6388	-38.4675
1792	27.5713	-38.427
1793	27.4903	-38.346
1794	27.4228	-38.3055
1795	27.5308	-38.3055
1796	27.3688	-38.481
1797	27.3958	-38.5215
1798	26.3156	-37.4009
1799	25.789	-40.0743
1800	24.8304	-40.1013
1801	23.9933	-43.3283
1802	23.6017	-43.9224
1803	21.4009	-44.2194
1804	19.8481	-45.4346
1805	17.8093	-45.5156
1806	17.2557	-45.5967
1807	17.1477	-45.6777
1808	17.0937	-45.7047
1809	17.0667	-45.7452
1810	16.9992	-45.9477
1811	16.9317	-46.5283
1812	16.3781	-46.5688
1813	15.8785	-46.5688
1814	15.757	-46.5688
1815	15.676	-46.8794
1816	15.5004	-46.9064
1817	15.2979	-46.9064
1818	15.2574	-46.9064
1819	15.5139	-46.9064
1820	15.5274	-46.9064
1821	15.703	-46.8659
1822	15.9325	-46.7308
1823	15.1089	-46.3123
1824	14.4743	-46.3123
1825	14.7848	-46.3123
1826	14.8523	-46.3393
1827	13.7047	-46.2988
1828	12.8	-46.1773
1829	12.773	-46.2448
1830	12.8405	-46.0287
1831	12.422	-46.0557
1832	12.1789	-46.0152
1833	12.0844	-46.0152
1834	12.3409	-46.0152
1835	12.5705	-45.7992
1836	12.5975	-45.7722
1837	13.0836	-45.7722
1838	13.1511	-45.7452
1839	13.5831	-45.7452
1840	13.7452	-45.7182
1841	14.0557	-45.5562
1842	14.3122	-45.4076
1843	14.7308	-45.3536
1844	14.9063	-45.3671
1845	15.0954	-45.3806
1846	15.0009	-45.3941
1847	14.7443	-44.611
1848	15.622	-44.503
1849	19.8211	-44.395
1850	20.6312	-44.2465
1851	20.6852	-44.2194
1852	20.6717	-41.6135
1853	20.6852	-41.4515
1854	20.4422	-41.2355
1855	20.4557	-41.2625
1856	20.8203	-41.168
1857	19.6456	-45.0026
1858	19.227	-45.3536
1859	18.6869	-45.7857
1860	18.6464	-45.4886
1861	17.2692	-34.7274
1862	15.4869	-34.6194
1863	15.3114	-30.3798
1864	15.2844	-29.5696
1865	15.3114	-28.7865
1866	15.3384	-28.7595
1867	15.3114	-28.3139
1868	15.2979	-28.0169
1869	15.1629	-28.1654
1870	15.1089	-27.5713
1871	15.1089	-26.9907
1872	15.1224	-26.8827
1873	15.0954	-25.6135
1874	14.9739	-23.5882
1875	14.9063	-22.3865
1876	14.7983	-22.184
1877	15.1764	-22.1165
1878	15.1764	-22.2785
1879	15.1899	-22.2785
1880	15.2034	-22.292
1881	15.2304	-22.0625
1882	15.2709	-21.4009
1883	15.2574	-21.4279
1884	15.2439	-21.4414
1885	15.2439	-21.4684
1886	15.2709	-21.4954
1887	15.3519	-21.4954
1888	15.3654	-21.4954
1889	15.4869	-21.4819
1890	15.8785	-21.5359
1891	15.919	-21.5359
1892	15.892	-21.5899
1893	15.946	-21.6034
1894	15.973	-21.6169
1895	15.8245	-21.6439
1896	15.703	-21.5494
1897	15.5814	-21.4009
1898	15.6085	-21.3468
1899	15.6625	-18.5654
1900	15.7435	-17.7823
1901	16.0135	-14.3528
1902	16.4861	-13.7452
1903	16.6211	-13.4211
1904	18.0253	-12.1924
1905	18.0793	-12.1114
1906	18.3359	-12.0439
1907	18.6869	-11.9629
1908	18.822	-11.9629
1909	18.822	-11.9359
1910	18.876	-11.7333
1911	18.903	-11.1798
1912	18.984	-11.1798
1913	18.957	-11.1933
1914	18.9435	-11.2068
1915	19.146	-11.0447
1916	22.1435	-11.0582
1917	22.454	-11.3418
1918	22.7916	-11.6928
1919	23.3452	-11.7604
1920	23.8447	-11.7873
1921	23.7367	-11.8414
1922	25.222	-11.9899
1923	28.6245	-12.0169
1924	29.0836	-12.0439
1925	29.0701	-12.0439
1926	29.0971	-12.0439
1927	31.2574	-12.0439
1928	31.2574	-12.0304
1929	32.054	-11.9494
1930	33.1882	-11.9359
1931	34.3359	-11.9359
1932	34.3494	-11.9089
1933	34.2279	-11.8819
1934	33.8903	-11.8414
1935	34.0523	-11.8143
1936	34.4439	-11.7873
1937	33.9983	-11.8279
1938	33.8633	-11.8549
1939	33.4312	-11.8279
1940	33.2827	-11.8009
1941	32.9992	-11.8009
1942	32.8102	-11.7873
1943	32.4996	-11.7873
1944	32.3781	-11.7738
1945	32.1891	-11.7604
1946	32.1891	-11.7604
1947	32.0675	-11.7738
1948	31.1359	-11.8143
1949	27.0312	-11.7873
1950	26.1536	-11.7873
1951	26.1131	-11.7873
1952	26.1131	-11.7333
1953	26.1536	-11.6928
1954	26.8017	-11.6928
1955	29.1106	-11.6388
1956	28.7865	-11.4093
1957	28.773	-7.57469
1958	29.2051	-7.0346
1959	29.6912	-6.57553
1960	30.1637	-6.3865
1961	30.2177	-6.3865
1962	30.6093	-5.0768
1963	31.1899	-4.68523
1964	31.2844	-4.30718
1965	31.5004	-4.23966
1966	35.6186	-4.18566
1967	36.0237	-4.10464
1968	38.1705	-4.07764
1969	38.7376	-3.74009
1970	38.7511	-3.71308
1971	38.8591	-3.71308
1972	38.8726	-3.68608
1973	38.9131	-3.51055
1974	38.8996	-3.47004
1975	38.9131	-3.44304
1976	38.8861	-3.36203
1977	38.481	-3.22701
1978	38.4945	-2.5654
1979	38.4945	-2.44388
1980	38.4675	-2.34937
1981	38.4405	-2.33587
1982	38.4	-2.30886
1983	38.4	-2.21435
1984	38.4	-2.20085
1985	38.4	-2.33587
1986	38.373	-3.65907
1987	38.292	-4.11815
1988	38.265	-4.23966
1989	38.103	-4.33418
1990	37.6844	-4.28017
1991	37.6304	-4.28017
1992	37.6169	-4.28017
1993	37.5629	-4.26667
1994	37.4954	-4.25317
1995	37.4684	-4.22616
1996	37.4414	-4.14515
1997	37.4279	-4.13165
1998	37.3874	-4.13165
1999	37.2929	-4.13165
[truncated: 1,899 more rows]

## Sheet: Fig.1c
filename length forward_count reverse_count total_count forward_pct reverse_pct total_pct
DC_RISC_L5_S25_L1_1.sam 18 52 20 72 1.409596 0.542152 1.951748
DC_RISC_L5_S25_L1_1.sam 19 51 93 144 1.382488 2.521008 3.903497
DC_RISC_L5_S25_L1_1.sam 20 241 285 526 6.532936 7.725671 14.258607
DC_RISC_L5_S25_L1_1.sam 21 1492 850 2342 40.444565 23.041475 63.486040
DC_RISC_L5_S25_L1_1.sam 22 293 212 505 7.942532 5.746815 13.689347
DC_RISC_L5_S25_L1_1.sam 23 39 28 67 1.057197 0.759013 1.816210
DC_RISC_L5_S25_L1_1.sam 24 16 17 33 0.433722 0.460829 0.894551
DC_RISC_L5_S26_L1_1.sam 18 19 24 43 0.490829 0.619995 1.110824
DC_RISC_L5_S26_L1_1.sam 19 83 85 168 2.144149 2.195815 4.339964
DC_RISC_L5_S26_L1_1.sam 20 243 405 648 6.277448 10.462413 16.739861
DC_RISC_L5_S26_L1_1.sam 21 1553 861 2414 40.118832 22.242315 62.361147
DC_RISC_L5_S26_L1_1.sam 22 254 253 507 6.561612 6.535779 13.097391
DC_RISC_L5_S26_L1_1.sam 23 22 39 61 0.568329 1.007492 1.575820
DC_RISC_L5_S26_L1_1.sam 24 7 23 30 0.180832 0.594162 0.774994
DC_RISC_L5_S27_L1_1.sam 18 14 13 27 0.712468 0.661578 1.374046
DC_RISC_L5_S27_L1_1.sam 19 48 36 84 2.442748 1.832061 4.274809
DC_RISC_L5_S27_L1_1.sam 20 128 167 295 6.513995 8.498728 15.012723
DC_RISC_L5_S27_L1_1.sam 21 815 430 1245 41.475827 21.882952 63.358779
DC_RISC_L5_S27_L1_1.sam 22 158 104 262 8.040712 5.292621 13.333333
DC_RISC_L5_S27_L1_1.sam 23 22 14 36 1.119593 0.712468 1.832061
DC_RISC_L5_S27_L1_1.sam 24 5 11 16 0.254453 0.559796 0.814249
DC_RISC_L5_S28_L1_1.sam 18 29 40 69 0.574371 0.792236 1.366607
DC_RISC_L5_S28_L1_1.sam 19 72 107 179 1.426025 2.119232 3.545256
DC_RISC_L5_S28_L1_1.sam 20 365 385 750 7.229154 7.625272 14.854427
DC_RISC_L5_S28_L1_1.sam 21 2063 1223 3286 40.859576 24.222618 65.082194
DC_RISC_L5_S28_L1_1.sam 22 340 300 640 6.734007 5.941771 12.675777
DC_RISC_L5_S28_L1_1.sam 23 51 51 102 1.010101 1.010101 2.020202
DC_RISC_L5_S28_L1_1.sam 24 9 14 23 0.178253 0.277283 0.455536

## Sheet: Fig.1d
position	sense				antisense
1	0	0	0	0	0	0	0	0
2	0	0	0	0	0.267653	-0.091339	0	0
3	0	0	0	0	0.267653	-0.182678	0	0
4	0	0	0	0	0.267653	-0.182678	0	0
5	0	0	0	0	0.267653	-0.182678	0	0
6	0	0	0	0	0.267653	-0.182678	0	0
7	0	0	0	0	0.267653	-0.182678	0	0
8	0	0	0	0	0.267653	-0.182678	0	0
9	0	0	0	0	0.267653	-0.182678	0	0
10	0	0	0	0	0.267653	-0.182678	0	0
11	0	0	0	0	0.267653	-0.182678	0	0
12	0	0	0	0	0.267653	-0.182678	0	0
13	0	0	0	0	0.267653	-0.182678	0	0
14	0	0	0	0	0.267653	-0.182678	0	0
15	0	0	0	0	0.267653	-0.182678	0	0
16	0	0	0	0	0.267653	-0.182678	0	0
17	0	0	0	0	0.267653	-0.182678	0	0
18	0	0	0	0	0.267653	-0.182678	0	0
19	0	0	0	0	0.267653	-0.182678	0	0
20	0	0	0	0	0.267653	-0.182678	0	0
21	0	0	0	0	0.267653	-0.182678	0	0
22	0	0	0	0	0.267653	-0.182678	0	0
23	0	0	0	0	0	-0.091339	0	0
24	0	0	0	0	0	0	0	0
25	0	0	0	0	0	0	0	0
26	0	0	0	0	0	0	0	0
27	0	0	0	0	0	0	0	0
28	0	0	0	0	0	0	0	0
29	0	0	0	0	0	0	0	0
30	0	0	0	0	0	0	0	0
31	0	0	0	0	0	0	0	0
32	0	0	0	0	0	0	0	0
33	0	0	0	0	0	0	0	0
34	0	0	0	0	0	0	0	0
35	0	0	0	0	0	0	0	0
36	0	0	0	0	0	0	0	0
37	0	0	0	0	0	0	0	0
38	0	0	0	0	0	0	0	0
39	0	0	0	0	0	0	0	0
40	0	0	0	0	0	0	0	0
41	0	0	0	0	0	0	0	0
42	0	0	0	0	0	0	0	0
43	0	0	0	0	0	0	0	0
44	0	0	0	0	0	0	0	0
45	0	0	0	0	0	0	0	0
46	0	0	0	0	0	0	0	0
47	0	0	0	0	0	0	0	0
48	0	0	0	0	0	0	0	0
49	0	0	0	0	0	0	0	0
50	0	0	0	0	0	0	0	0
51	0	0	0	0	0	0	0	0
52	0	0	0	0	0	0	0	0
53	0	0	0	0	0	0	0	0
54	0	0	0	0	0	0	0	0
55	0	0	0	0	0	0	0	0
56	0	0	0	0	0	0	0	0
57	0	0	0	0	0	0	0	0
58	0	0	0	0	0	0	0	0
59	0	0	0	0	0	0	0	0
60	0	0	0	0	0	0	0	0
61	0	0	0	0	0	0	0	0
62	0	0	0	0	0	0	0	0
63	0	0	0	0	0	0	0	0
64	0	0	0	0	0	0	0	0
65	0	0	0	0	0	0	0	0
66	0	0	0	0	0	0	0	0
67	0	0	0	0	0	0	0	0
68	0	0	0	0	0	0	0	0
69	0	0	0	0	0	0	0	0
70	0	0	0	0	0	0	0	0
71	0	0	0	0	0	0	0	0
72	0	0	0	0	0	0	0	0
73	0	0	0	0	0	0	0	0
74	0	0	0	0	0	0	0	0
75	0	0	0	0	0	0	0	0
76	0	0	0	0	0	0	0	0
77	0	0	0	0	0	0	0	0
78	0	0	0	0	0	0	0	0
79	0	0	0	0	0	0	0	0
80	0	0	0	0	0	0	0	0
81	0	0	0	0	0	0	0	0
82	0	0	0	0	0	0	0	0
83	0	0	0	0	0	0	0	0
84	0	0	0	0	0	0	0	0
85	0	0	0	0	0	0	0	0
86	0	0	0	0	0	0	0	0
87	0	0	0	0	0	0	0	0
88	0	0	0	0	0	0	0	0
89	0	0	0	0	0	0	0	0
90	0	0	0	0	0	0	0	0
91	0	0	0	0	0	-0.091339	0	0
92	0	0	0	0	0	-0.091339	0	0
93	0	0	0	0	0	-0.091339	0	0
94	0	0	0	0	0	-0.091339	0	0
95	0	0	0	0	0	-0.091339	0	0
96	0	0	0	0	0	-0.091339	0	0
97	0	0	0	0	0	-0.091339	0	0
98	0	0	0	0	0	-0.091339	0	0
99	0	0	0	0	0	-0.091339	0	0
100	0	0	0	0	0	-0.091339	0	0
101	0	0	0	0	0	-0.091339	0	0
102	0	0	0	0	0	-0.091339	0	0
103	0	0	0	0	0	-0.091339	0	0
104	0	0	0	0	0	-0.091339	0	0
105	0	0	0	0	0	-0.091339	0	0
106	0	0	0	0	0	-0.091339	0	0
107	0	0	0	0	0	-0.091339	0	0
108	0	0	0	0	0	-0.091339	0	0
109	0	0	0	0	0	-0.091339	0	0
110	0	0	0	0	0	-0.091339	0	0
111	0	0	0	0	0	-0.091339	0	0
112	0	0	0	0	0	0	0	0
113	0	0	0	0	0	0	0	0
114	0	0	0	0	0	0	0	0
115	0	0	0	0	0	0	0	0
116	0	0	0	0	0	0	0	0
117	0	0	0	0	0	0	0	0
118	0	0	0	0	0	0	0	0
119	0	0	0	0	0	0	0	0
120	0	0	0	0	0	0	0	0
121	0	0	0	0	0	0	0	0
122	0	0	0	0	0	0	0	0
123	0	0	0	0	0	0	0	0
124	0	0	0	0	0	0	0	0
125	0	0	0	0	0	0	0	0
126	0	0	0	0	0	0	0	0
127	0	0	0	0	0	0	0	0
128	0	0	0	0	0	0	0	0
129	0	0	0	0	0	0	0	0
130	0	0	0	0	0	0	0	0
131	0	0	0	0.133827	0	0	0	0
132	0	0	0	0.133827	0	0	0	0
133	0	0	0	0.133827	0	0	0	0
134	0	0	0	0.133827	0	0	0	0
135	0	0	0	0.133827	0	0	0	0
136	0	0	0	0.133827	0	0	0	0
137	0	0	0	0.133827	0	0	0	0
138	0	0	0	0.133827	0	0	0	0
139	0	0	0	0.133827	0	0	0	0
140	0	0	0	0.133827	0	0	0	0
141	0	0	0	0.133827	0	0	0	0
142	0	0	0	0.133827	0	0	0	0
143	0	0	0	0.133827	0	0	0	0
144	0	0	0	0.133827	0	0	0	0
145	0	0	0	0.133827	0	0	0	0
146	0	0	0	0.133827	0	0	0	0
147	0	0	0	0.133827	0	0	0	0
148	0	0	0	0.133827	0	0	0	0
149	0	0	0	0.133827	0	0	0	0
150	0	0	0	0.133827	0	0	0	0
151	0	0	0	0.133827	0	0	0	0
152	0	0	0	0	0	0	0	0
153	0	0	0	0	0	0	0	0
154	0	0	0	0	0	0	0	0
155	0	0	0	0	0	0	0	0
156	0	0	0	0	0	0	0	0
157	0	0	0	0	0	0	0	0
158	0	0	0	0	0	0	0	0
159	0	0	0	0	0	0	0	0
160	0	0	0	0	0	0	0	0
161	0	0	0	0	0	0	0	0
162	0	0	0	0	0	0	0	0
163	0	0	0	0	0	0	0	0
164	0	0	0	0	0	0	0	0
165	0	0	0	0	0	0	0	0
166	0	0	0	0	0	0	0	0
167	0	0	0	0	0.267653	0	0	0
168	0	0	0	0	0.40148	0	0	0
169	0	0	0	0	0.40148	-0.091339	0	0
170	0	0	0	0	0.40148	-0.091339	0	0
171	0	0	0	0	0.40148	-0.091339	0	0
172	0	0	0	0	0.535307	-0.091339	0	0
173	0	0	0	0	0.535307	-0.091339	0	0
174	0	0	0	0	0.535307	-0.091339	0	0
175	0	0	0	0	0.535307	-0.091339	0	0
176	0	0	0	0	0.535307	-0.091339	0	0
177	0	0	0	0	0.535307	-0.091339	0	0
178	0	0	0	0	0.535307	-0.091339	0	0
179	0	0	0	0	0.535307	-0.091339	0	0
180	0	0	0	0	0.535307	-0.091339	0	0
181	0	0	0	0	0.535307	-0.091339	0	0
182	0	0	0	0	0.535307	-0.091339	0	0
183	0	0	0	0	0.535307	-0.091339	0	0
184	0	0	0	0	0.535307	-0.091339	0	0
185	0.274016	0.484514	0.450151	0.535307	0.535307	-0.091339	0	0
186	0.639372	0.646019	1.12538	0.936787	0.535307	-0.182678	-0.225075	0
187	0.639372	1.13053	1.57553	1.73975	0.535307	-0.182678	-0.225075	-0.32301
188	0.639372	1.13053	1.57553	1.73975	0.267653	-0.182678	-0.225075	-0.32301
189	0.639372	1.13053	1.57553	1.73975	0.133827	-0.182678	-0.225075	-0.32301
190	0.639372	1.13053	1.57553	1.87357	0.133827	-0.091339	-0.225075	-0.32301
191	0.639372	1.13053	1.57553	1.87357	0.133827	-0.091339	-0.225075	-0.32301
192	0.639372	1.13053	1.57553	1.87357	0.133827	-0.091339	-0.225075	-0.32301
193	0.639372	1.13053	1.57553	2.0074	0	-0.091339	-0.225075	-0.32301
194	0.639372	1.13053	1.57553	2.0074	0	-0.091339	-0.225075	-0.32301
195	0.639372	1.29204	1.57553	2.0074	0	-0.091339	-0.225075	-0.32301
196	0.639372	1.29204	1.57553	2.0074	0	-0.091339	-0.225075	-0.32301
197	0.639372	1.29204	1.57553	2.0074	0	-0.091339	-0.225075	-0.32301
198	0.639372	1.29204	1.57553	2.0074	0	-0.091339	-0.225075	-0.32301
199	0.639372	1.29204	1.57553	2.0074	0	-0.091339	-0.225075	-0.32301
200	0.639372	1.29204	1.57553	2.0074	0.40148	-0.091339	-0.450151	-0.32301
201	0.639372	1.29204	1.57553	2.0074	0.80296	-0.182678	-0.900302	-0.484514
202	0.639372	1.29204	1.57553	2.0074	0.80296	-0.274016	-0.900302	-0.484514
203	0.639372	1.29204	1.57553	2.0074	0.80296	-0.274016	-0.900302	-0.484514
204	0.639372	1.29204	1.57553	2.0074	0.80296	-0.274016	-1.12538	-0.484514
205	0.639372	1.45354	1.57553	2.0074	0.80296	-0.274016	-1.12538	-0.484514
206	0.365355	0.969029	1.12538	1.73975	0.936787	-0.548033	-1.12538	-0.484514
207	0	0.807524	0.450151	1.33827	0.936787	-0.456694	-1.57553	-0.484514
208	0	0.32301	0	0.535307	0.936787	-0.456694	-1.57553	-0.646019
209	0	0.32301	0	0.535307	0.936787	-0.456694	-1.57553	-0.646019
210	0	0.32301	0	0.535307	0.936787	-0.456694	-1.57553	-0.646019
211	0	0.32301	0	0.40148	0.936787	-0.456694	-1.57553	-0.646019
212	0	0.32301	0	0.40148	0.936787	-0.456694	-1.57553	-0.646019
213	0	0.32301	0	0.40148	0.936787	-0.456694	-1.57553	-0.646019
214	0	0.32301	0	0.267653	0.936787	-0.456694	-1.57553	-0.646019
215	0	0.32301	0	0.267653	0.936787	-0.456694	-1.57553	-0.646019
216	0	0.161505	0	0.267653	0.936787	-0.456694	-1.57553	-0.646019
217	0	0.161505	0	0.267653	0.936787	-0.456694	-1.57553	-0.646019
218	0	0.161505	0	0.267653	0.936787	-0.456694	-1.57553	-0.646019
219	0	0.161505	0	0.267653	0.936787	-0.456694	-1.57553	-0.646019
220	0	0.161505	0	0.267653	0.936787	-0.456694	-1.57553	-0.646019
221	0	0.161505	0	0.267653	0.535307	-0.456694	-1.35045	-0.646019
222	0	0.161505	0	0.267653	1.07061	-0.365355	-1.12538	-0.646019
223	0	0.161505	0	0.267653	1.07061	-0.365355	-1.12538	-0.807524
224	0	0.161505	0	0.267653	1.73975	-0.548033	-2.92598	-1.45354
225	0	0.161505	0	0.267653	2.0074	-1.09607	-3.15106	-1.61505
226	0.091339	0	0	0.267653	2.14123	-1.37008	-3.60121	-1.77655
227	0.091339	0	0	0	2.94419	-2.28347	-4.50151	-2.26107
228	0.091339	0.161505	0	0.133827	2.94419	-2.28347	-3.82628	-2.26107
229	0.182678	0.161505	0.225075	0.267653	2.94419	-2.28347	-3.82628	-1.77655
230	0.182678	0.161505	0.225075	0.267653	2.94419	-2.37481	-3.82628	-1.77655
231	0.182678	0.161505	0.225075	0.267653	2.94419	-2.37481	-3.82628	-1.77655
232	0.182678	0.161505	0.225075	0.267653	2.94419	-2.37481	-3.82628	-1.77655
233	0.182678	0.161505	0.225075	0.267653	2.94419	-2.37481	-3.82628	-1.77655
234	0.182678	0.161505	0.225075	0.267653	2.94419	-2.37481	-3.82628	-1.77655
235	0.182678	0.161505	0.225075	0.267653	2.94419	-2.37481	-3.82628	-1.77655
236	0.182678	0.161505	0.225075	0.267653	2.94419	-2.37481	-3.82628	-1.77655
237	0.182678	0.161505	0.225075	0.267653	2.94419	-2.37481	-3.82628	-1.77655
238	0.182678	0.161505	0.225075	0.267653	2.94419	-2.37481	-3.82628	-1.77655
239	0.182678	0.161505	0.225075	0.267653	2.94419	-2.37481	-3.82628	-1.77655
240	0.274016	0.161505	0.225075	0.267653	2.94419	-2.37481	-3.82628	-1.77655
241	0.274016	0.161505	0.225075	0.267653	2.94419	-2.37481	-3.82628	-1.77655
242	0.274016	0.161505	0.225075	0.267653	2.94419	-2.37481	-3.82628	-1.77655
243	0.274016	0.32301	0.225075	0.267653	2.0074	-2.37481	-3.60121	-1.61505
244	0.274016	0.32301	0.225075	0.267653	2.0074	-2.28347	-3.60121	-1.45354
245	0.274016	0.32301	0.225075	0.267653	1.33827	-2.10079	-1.8006	-0.807524
246	0.274016	0.32301	0.225075	0.267653	1.07061	-1.55276	-1.35045	-0.646019
247	0.182678	0.32301	0.225075	0.267653	1.07061	-1.27874	-1.12538	-0.484514
248	0.182678	0.32301	0.225075	0.267653	0.133827	-0.182678	-0.225075	0
249	0.182678	0.161505	0.225075	0.133827	0.133827	-0.182678	-0.225075	0
250	0.091339	0.161505	0	0	0.133827	-0.182678	-0.225075	0
251	0.091339	0.161505	0	0	0.133827	-0.091339	-0.225075	0
252	0.091339	0.161505	0	0	0.133827	-0.091339	-0.225075	0
253	0.091339	0.161505	0	0	1.33827	-0.365355	-1.12538	-0.646019
254	0.091339	0.161505	0	0	2.14123	-0.822049	-3.15106	-1.45354
255	0.091339	0.161505	0	0	7.89578	-5.02363	-13.5045	-4.84514
256	0.091339	0.161505	0	0	8.29726	-5.20631	-14.4048	-4.84514
257	0.091339	0.161505	0	0	8.56491	-5.29765	-15.0801	-5.00665
258	0.091339	0.161505	0	0	9.76935	-5.66301	-16.4305	-5.32966
259	0.182678	0.161505	0	0	9.76935	-5.66301	-16.6556	-5.32966
260	0.182678	0.161505	0	0	9.76935	-5.66301	-16.6556	-5.32966
261	0.091339	0.161505	0	0	9.76935	-5.66301	-16.6556	-5.32966
262	0.091339	0.161505	0	0	9.76935	-5.66301	-16.6556	-5.32966
263	0.091339	0.161505	0	0	9.76935	-5.66301	-16.6556	-5.32966
264	0.091339	0	0	0	9.76935	-5.66301	-16.6556	-5.32966
265	0.091339	0	0	0	9.76935	-5.66301	-16.6556	-5.32966
266	0.091339	0	0	0	9.76935	-5.66301	-16.6556	-5.32966
267	0.091339	0	0	0	9.76935	-5.66301	-16.6556	-5.32966
268	0.091339	0	0	0	9.63552	-5.66301	-16.4305	-5.32966
269	0.091339	0	0	0	9.63552	-5.57167	-16.4305	-5.32966
270	0.091339	0	0	0	9.63552	-5.57167	-16.4305	-5.32966
271	0.091339	0	0	0	9.63552	-5.57167	-16.4305	-5.32966
272	0.091339	0	0	0	9.63552	-5.57167	-16.4305	-5.32966
273	0.091339	0	0	0	9.63552	-5.57167	-16.4305	-5.32966
274	0.091339	0	0	0	8.43108	-5.29765	-15.5302	-4.68364
275	0.091339	0	0	0	7.62812	-4.84096	-13.5045	-3.87611
276	0.091339	0	0	0	1.87357	-0.639372	-3.15106	-0.484514
277	0.091339	0	0	0	1.47209	-0.456694	-2.25075	-0.484514
278	0.091339	0	0	0	1.20444	-0.365355	-1.57553	-0.32301
279	0.091339	0	0	0	0	0	-0.225075	0
280	0	0	0	0	0	0	0	0
281	0	0.161505	0	0	0	0	0	0
282	0	0.161505	0	0	0	0	0	0
283	0	0.161505	0	0	0	0	0	0
284	0	0.161505	0	0	0	0	0	0
285	0	0.161505	0	0	0	0	0	0
286	0	0.161505	0	0.133827	0	0	0	0
287	0	0.161505	0	0.133827	0	0	0	0
288	0	0.161505	0	0.133827	0	0	0	0
289	0	0.161505	0	0.133827	0	0	0	0
290	0	0.161505	0	0.133827	0	0	0	0
291	0	0.161505	0	0.133827	0.267653	-0.091339	-0.450151	-0.161505
292	0	0.161505	0	0.267653	0.267653	-0.091339	-0.450151	-0.161505
293	0	0.161505	0	0.40148	0.267653	-0.091339	-0.450151	-0.161505
294	0.274016	0.161505	0	0.669134	0.267653	-0.091339	-0.450151	-0.161505
295	0.274016	0.161505	0	0.669134	0.267653	-0.091339	-0.450151	-0.161505
296	0.274016	0.161505	0	0.669134	0.267653	-0.091339	-0.450151	-0.161505
297	0.274016	0.161505	0	0.669134	0.267653	-0.091339	-0.450151	-0.161505
298	0.274016	0.161505	0	0.669134	0.267653	-0.365355	-0.450151	-0.161505
299	0.274016	0.161505	0	0.669134	0.267653	-0.365355	-0.450151	-0.161505
300	0.274016	0.161505	0	0.669134	0.267653	-0.365355	-0.450151	-0.161505
301	0.274016	0.161505	0	0.669134	0.267653	-0.365355	-0.450151	-0.161505
302	0.274016	0	0	0.669134	0.267653	-0.365355	-0.450151	-0.161505
303	0.274016	0	0	0.669134	0.267653	-0.365355	-0.450151	-0.161505
304	0.274016	0	0	0.669134	0.267653	-0.365355	-0.450151	-0.161505
305	0.274016	0	0	0.669134	0.267653	-0.365355	-0.450151	-0.161505
306	0.274016	0	0	0.669134	0.267653	-0.365355	-0.450151	-0.161505
307	0.274016	0	0	0.535307	0.267653	-0.365355	-0.450151	-0.161505
308	0.274016	0	0.225075	0.535307	0.267653	-0.365355	-0.450151	-0.161505
309	0.274016	0	0.225075	0.535307	0.267653	-0.365355	-0.675226	-0.161505
310	0.274016	0	0.225075	0.669134	0.267653	-0.365355	-0.675226	-0.161505
311	0.456694	0	0.225075	0.669134	0.267653	-0.365355	-0.675226	-0.161505
312	0.456694	0	0.225075	0.669134	0	-0.274016	-0.225075	0
313	0.456694	0	0.225075	0.535307	0	-0.274016	-0.225075	0
314	0.456694	0	0.225075	0.40148	0	-0.274016	-0.225075	0
315	0.182678	0	0.225075	0.133827	0	-0.274016	-0.225075	0
316	0.182678	0	0.225075	0.133827	0	-0.274016	-0.225075	0
317	0.182678	0	0.225075	0.133827	0	-0.274016	-0.225075	0
318	0.182678	0	0.225075	0.133827	0	-0.274016	-0.225075	0
319	0.182678	0	0.225075	0.133827	0	0	-0.225075	0
320	0.182678	0	0.225075	0.133827	0	0	-0.225075	0
321	0.182678	0	0.225075	0.133827	0	0	-0.225075	0
322	0.182678	0	0.225075	0.133827	0	0	-0.225075	0
323	0.182678	0	0.225075	0.133827	0	0	-0.225075	0
324	0.182678	0	0.225075	0.133827	0	0	-0.225075	0
325	0.274016	0	0.450151	0.40148	0	0	-0.225075	0
326	0.639372	0.969029	2.47583	1.20444	0	0	-0.225075	0
327	0.639372	0.969029	2.47583	1.20444	0	-0.091339	-0.450151	0
328	0.639372	0.969029	2.47583	1.20444	0	-0.091339	-0.450151	0
329	0.639372	0.969029	2.25075	1.20444	0	-0.091339	-0.450151	0
330	0.639372	0.969029	2.25075	1.20444	0.133827	-0.274016	-0.900302	-0.161505
331	0.639372	0.969029	2.25075	1.07061	0.936787	-0.639372	-1.57553	-0.32301
332	0.456694	0.969029	2.25075	1.07061	3.07801	-1.55276	-4.27643	-1.13053
333	0.456694	0.969029	2.25075	1.20444	3.07801	-1.55276	-4.27643	-1.13053
334	0.456694	0.969029	2.25075	1.20444	3.07801	-1.55276	-4.27643	-1.13053
335	0.456694	0.969029	2.25075	1.20444	3.21184	-1.55276	-4.27643	-1.13053
336	0.456694	0.969029	2.25075	1.20444	3.47949	-2.10079	-5.40181	-1.29204
337	0.456694	0.969029	2.25075	1.20444	3.47949	-2.10079	-5.40181	-1.29204
338	0.456694	0.969029	2.25075	1.20444	3.74715	-2.37481	-6.30211	-1.29204
339	0.456694	0.969029	2.25075	1.20444	3.74715	-2.37481	-6.30211	-1.45354
340	0.456694	0.969029	2.25075	1.20444	4.55011	-2.46615	-6.30211	-1.45354
341	0.456694	0.969029	2.25075	1.20444	4.55011	-2.46615	-6.52719	-1.45354
342	0.456694	0.969029	2.25075	1.20444	5.08542	-2.46615	-6.52719	-1.45354
343	0.456694	0.969029	2.25075	1.20444	5.08542	-2.46615	-6.52719	-1.45354
344	0.456694	0.969029	2.25075	1.20444	5.08542	-2.46615	-6.52719	-1.45354
345	0.456694	0.969029	2.25075	1.20444	5.08542	-2.46615	-6.52719	-1.45354
346	0.365355	0.969029	2.02568	0.936787	5.08542	-2.46615	-6.52719	-1.45354
347	0	0	0	0.133827	5.08542	-2.46615	-6.52719	-1.45354
348	0	0	0	0.133827	5.08542	-2.37481	-6.30211	-1.45354
349	0	0	0	0.133827	5.08542	-2.37481	-6.30211	-1.45354
350	0	0	0	0.133827	5.08542	-2.37481	-6.30211	-1.45354
351	0	0	0	0.133827	4.95159	-2.19213	-5.62689	-1.29204
352	0	0	0	0.133827	4.14863	-1.82678	-4.95166	-1.13053
353	0	0	0	0.133827	2.0074	-0.913388	-2.25075	-0.32301
354	0	0	0	0	2.0074	-0.913388	-2.25075	-0.32301
355	0	0	0	0	2.0074	-0.913388	-2.25075	-0.32301
356	0	0	0	0	1.87357	-0.913388	-2.25075	-0.32301
357	0	0	0	0	1.60592	-0.365355	-1.12538	-0.161505
358	0	0	0	0	1.60592	-0.365355	-1.12538	-0.161505
359	0	0	0	0	1.33827	-0.091339	-0.225075	-0.161505
360	0	0	0	0	1.33827	-0.091339	-0.225075	0
361	0	0	0	0	0.535307	0	-0.225075	0
362	0	0	0	0.40148	0.535307	0	0	0
363	0.182678	0.32301	0.450151	0.40148	0	0	0	0
364	0.639372	0.646019	1.8006	1.33827	0	0	0	0
365	14.3402	12.9204	40.7387	24.0888	0	0	0	0
366	14.5229	13.0819	41.1888	24.2226	0	0	0	0
367	14.5229	13.0819	41.4139	24.2226	0	0	0	0
368	14.5229	13.0819	41.4139	24.2226	0	0	0	0
369	14.7969	13.0819	41.4139	24.2226	0	0	0	0
370	15.1622	13.7279	41.639	24.8918	0	0	0	0
371	15.4363	13.8894	41.639	24.8918	0	0	0	0
372	15.4363	13.8894	41.639	24.8918	0	0	0	0
373	15.4363	13.8894	41.639	24.8918	0	0	0	0
374	15.4363	13.8894	41.639	24.8918	0	0	0	0
375	15.4363	13.8894	41.639	24.8918	0	0	0	0
376	15.5276	13.8894	41.639	24.8918	0	0	0	0
377	15.5276	13.8894	41.639	24.8918	0	0	0	0
378	15.5276	13.8894	41.639	24.8918	0	0	0	0
379	15.5276	13.8894	41.639	24.8918	0	0	-0.450151	0
380	15.5276	13.8894	41.639	24.8918	0	0	-0.450151	0
381	15.5276	13.8894	41.639	24.8918	0	0	-0.450151	0
382	15.5276	13.8894	41.639	24.8918	0	0	-0.450151	0
383	15.5276	13.8894	41.639	24.4903	0	0	-0.450151	0
384	15.3449	13.5664	41.1888	24.4903	0	0	-0.450151	0
385	14.8882	13.2434	39.8384	23.5535	0	0	-0.450151	0
386	1.1874	0.969029	0.900302	0.80296	0	0	-0.450151	0
387	1.00473	0.807524	0.450151	0.669134	0	0	-0.450151	0
388	1.00473	0.807524	0.225075	0.669134	0	0	-0.450151	0
389	1.00473	0.807524	0.225075	0.669134	0	0	-0.450151	0
390	0.73071	0.807524	0.225075	0.669134	0	0	-0.450151	0
391	0.365355	0.161505	0	0	0	0	-0.450151	0
392	0.091339	0	0	0	0.133827	0	-0.450151	0
393	0.091339	0	0	0	0.133827	0	-0.450151	0
394	0.091339	0	0	0	0.535307	0	-0.450151	0
395	0.091339	0	0	0.133827	0.535307	0	-0.450151	0
396	0.091339	0	0	0.133827	0.535307	0	-0.450151	0
397	0	0	0	0.133827	0.535307	0	-0.450151	0
398	0	0	0	0.133827	0.535307	0	-0.450151	0
399	0	0	0	0.133827	0.535307	0	-0.450151	0
400	0	0	0	0.133827	0.535307	0	0	0
401	0	0	0	0.133827	0.535307	0	0	0
402	0	0	0	0.133827	0.535307	0	0	0
403	0	0	0	0.133827	0.535307	0	0	0
404	0	0	0	0.133827	0.535307	0	0	0
405	0	0	0	0.133827	0.535307	-0.091339	0	0
406	0.182678	0	0	0.133827	0.535307	-0.091339	0	0
407	0.182678	0	0	0.133827	0.669134	-0.091339	-0.225075	0
408	0.182678	0	0	0.133827	0.669134	-0.091339	-0.450151	-0.161505
409	0.182678	0	0	0.133827	0.669134	-0.091339	-0.450151	-0.161505
410	0.274016	0	0.675226	0.133827	0.669134	-0.091339	-0.450151	-0.161505
411	0.274016	0	0.675226	0.133827	0.669134	-0.091339	-0.450151	-0.161505
412	0.274016	0	0.675226	0.133827	0.669134	-0.091339	-0.450151	-0.161505
413	0.274016	0	0.675226	0.133827	0.535307	-0.091339	-0.450151	-0.161505
414	0.274016	0	0.675226	0.133827	0.535307	-0.091339	-0.450151	-0.161505
415	0.274016	0	0.675226	0.133827	0.133827	-0.091339	-0.450151	-0.161505
416	0.274016	0	0.675226	0	0.133827	-0.091339	-0.450151	-0.161505
417	0.274016	0	0.675226	0	0.133827	-0.091339	-0.450151	-0.161505
418	0.274016	0	0.675226	0	0.133827	-0.091339	-0.450151	-0.161505
419	0.274016	0	0.675226	0	0.133827	-0.091339	-0.450151	-0.161505
420	0.274016	0	0.675226	0	0.133827	-0.091339	-0.450151	-0.161505
421	0.274016	0	0.675226	0	0.133827	-0.091339	-0.450151	-0.161505
422	0.274016	0	0.675226	0	0.133827	-0.091339	-0.450151	-0.161505
423	0.274016	0	0.675226	0	0.535307	-0.091339	-0.900302	-0.807524
424	0.274016	0	0.675226	0	0.535307	-0.091339	-0.900302	-0.807524
425	0.274016	0	0.675226	0	0.535307	-0.274016	-1.12538	-0.807524
426	0.274016	0	0.675226	0	0.535307	-0.182678	-1.12538	-0.807524
427	0.091339	0	0.675226	0	0.535307	-0.182678	-1.12538	-0.807524
428	0.091339	0	0.675226	0	0.40148	-0.182678	-0.900302	-0.807524
429	0.091339	0	0.675226	0	0.40148	-0.182678	-0.675226	-0.646019
430	0.091339	0	0.675226	0	0.40148	-0.182678	-0.675226	-0.646019
431	0	0	0	0	0.40148	-0.182678	-0.675226	-0.646019
432	0	0	0	0	0.40148	-0.182678	-0.675226	-0.646019
433	0	0	0	0	0.40148	-0.182678	-0.675226	-0.646019
434	0	0	0	0	0.40148	-0.182678	-0.675226	-0.646019
435	0	0	0	0	0.40148	-0.182678	-0.675226	-0.646019
436	0	0	0	0	0.40148	-0.182678	-0.675226	-0.646019
437	0	0	0	0	0.40148	-0.182678	-0.675226	-0.646019
438	0	0	0	0	0.40148	-0.182678	-0.675226	-0.646019
439	0	0	0	0	0.40148	-0.182678	-0.675226	-0.646019
440	0	0	0	0	0.40148	-0.548033	-0.675226	-0.646019
441	0.091339	0	0	0	0.40148	-0.548033	-0.675226	-0.646019
442	0.091339	0	0	0	0.40148	-0.548033	-0.675226	-0.646019
443	0.091339	0	0	0	0.40148	-0.548033	-0.675226	-0.646019
444	0.091339	0	0	0	0	-0.548033	-0.225075	0
445	0.274016	0.32301	0.450151	0.669134	0	-0.548033	-0.225075	0
446	0.274016	0.32301	0.450151	0.669134	0	-0.456694	0	0
447	0.274016	0.32301	0.450151	0.669134	0	-0.456694	0	0
448	0.274016	0.32301	0.450151	0.669134	0	-0.456694	0	0
449	0.274016	0.32301	0.450151	0.669134	0	-0.456694	0	0
450	0.274016	0.32301	0.450151	0.669134	0.133827	-0.456694	0	0
451	0.274016	0.32301	0.450151	0.669134	0.133827	-0.456694	0	0
452	0.274016	0.32301	0.450151	0.669134	0.133827	-0.456694	0	0
453	0.365355	0.32301	0.450151	0.669134	0.133827	-0.456694	0	0
454	0.456694	0.32301	0.675226	0.669134	0.133827	-0.456694	0	0
455	0.456694	0.32301	0.675226	0.669134	0.133827	-0.456694	0	0
456	0.548033	0.32301	0.675226	0.669134	0.133827	-0.456694	0	0
457	0.548033	0.32301	0.675226	0.669134	0.133827	-0.456694	0	0
458	0.548033	0.484514	0.675226	0.669134	0.133827	-0.456694	0	0
459	1.00473	0.969029	1.12538	1.20444	0.267653	-0.456694	0	0
460	1.00473	1.29204	1.35045	1.33827	0.267653	-0.456694	0	0
461	1.1874	1.61505	1.57553	1.33827	0.267653	-0.091339	0	0
462	1.09607	1.61505	1.57553	1.33827	0.267653	-0.091339	0	0
463	1.09607	1.61505	1.57553	1.33827	0.267653	-0.091339	-0.675226	0
464	1.09607	1.61505	1.57553	1.33827	0.267653	-0.091339	-0.675226	0
465	1.1874	1.77655	1.57553	1.33827	0.267653	-0.091339	-0.675226	0
466	1.00473	1.45354	1.12538	0.669134	0.267653	-0.091339	-0.675226	0
467	1.55276	2.26107	2.02568	1.20444	0.267653	-0.456694	-1.12538	0
468	1.55276	2.26107	2.02568	1.20444	0.267653	-0.548033	-1.12538	0
469	1.55276	2.58408	2.02568	1.47209	0.267653	-0.822049	-1.12538	0
470	1.91812	2.74558	3.15106	2.40888	0.267653	-0.822049	-1.12538	0
471	1.91812	2.90709	3.15106	2.40888	0.267653	-0.822049	-1.12538	0
472	2.00945	2.90709	3.15106	2.40888	0.267653	-1.00473	-1.12538	0
473	2.00945	2.90709	3.15106	2.40888	0.267653	-1.00473	-1.12538	0
474	1.91812	2.90709	3.15106	2.40888	0.267653	-1.00473	-1.12538	0
475	1.82678	2.90709	2.92598	2.40888	0.267653	-1.00473	-1.12538	-0.161505
476	1.82678	2.90709	2.92598	2.40888	0.267653	-1.00473	-1.12538	-0.32301
477	1.73544	2.90709	2.92598	2.40888	0.40148	-1.00473	-1.12538	-0.32301
478	1.73544	2.90709	2.92598	2.40888	0.80296	-1.1874	-1.12538	-0.484514
479	1.73544	2.74558	2.92598	2.40888	0.80296	-1.27874	-1.12538	-0.807524
480	1.27874	2.26107	2.47583	1.87357	0.669134	-1.27874	-1.12538	-0.807524
481	1.27874	1.93806	2.25075	2.0074	0.669134	-1.27874	-1.12538	-0.807524
482	1.09607	1.61505	2.02568	2.0074	0.669134	-1.27874	-1.12538	-0.807524
483	1.09607	1.61505	2.02568	2.0074	0.669134	-1.27874	-1.12538	-0.807524
484	1.09607	1.61505	2.02568	2.0074	0.669134	-1.27874	-0.450151	-0.807524
485	1.09607	1.61505	2.02568	2.0074	0.669134	-1.27874	-0.450151	-0.807524
486	1.00473	1.45354	2.02568	2.0074	0.669134	-1.27874	-0.450151	-0.807524
487	1.00473	1.45354	2.02568	2.0074	0.669134	-1.27874	-0.450151	-0.807524
488	1.1874	0.646019	2.25075	2.0074	0.669134	-0.822049	0	-0.807524
489	1.1874	0.807524	2.25075	2.14123	0.669134	-0.73071	0	-0.807524
490	1.1874	0.484514	2.25075	1.87357	0.669134	-0.456694	0	-0.807524
491	0.822049	0.32301	1.12538	0.936787	0.669134	-0.456694	0	-0.807524
492	0.822049	0.161505	1.12538	0.936787	0.535307	-0.456694	0	-0.807524
493	1.00473	0.161505	1.12538	0.936787	0.535307	-0.274016	0	-0.807524
494	1.00473	0.161505	1.12538	0.936787	0.535307	-0.274016	0	-0.807524
495	1.00473	0.161505	1.12538	0.936787	0.535307	-0.274016	0	-0.807524
496	1.00473	0.161505	1.12538	0.936787	0.535307	-0.274016	0	-0.646019
497	1.00473	0.161505	1.12538	0.936787	0.535307	-0.274016	0	-0.484514
498	1.00473	0.161505	1.12538	0.936787	0.40148	-0.274016	0	-0.484514
499	1.00473	0.161505	1.12538	0.936787	0	-0.091339	0	-0.32301
500	1.00473	0.161505	1.12538	0.936787	0	0	0	0
501	1.00473	0.161505	1.12538	0.936787	0	0	0	0
502	1.00473	0.161505	1.12538	0.669134	0	0	0	0
503	1.00473	0.161505	1.12538	0.669134	0	0	0	0
504	1.00473	0.161505	1.12538	0.669134	0	0	0	0
505	1.00473	0.161505	1.12538	0.669134	0	0	0	0
506	1.00473	0.161505	1.12538	0.669134	0	0	0	0
507	1.00473	0.161505	1.12538	0.669134	0	0	0	0
508	1.00473	0.161505	1.12538	0.669134	0	0	0	0
509	0.274016	0.161505	0	0.133827	0	0	0	0
510	0.274016	0	0	0	0	0	0	0
511	0.274016	0	0	0.133827	0	0	0	0
512	0.274016	0.161505	0	0.669134	0	0	0	0
513	0.274016	0.32301	0	1.07061	0.133827	-0.182678	0	0
514	0	0.32301	0	1.07061	0.133827	-0.182678	-0.225075	0
515	0	0.32301	0	1.07061	0.133827	-0.182678	-0.225075	0
516	0	0.32301	0	1.07061	0.133827	-0.182678	-0.225075	0
517	0	0.32301	0	1.07061	0.133827	-0.182678	-0.225075	0
518	0	0.32301	0	1.07061	0.133827	-0.182678	-0.225075	0
519	0	0.32301	0	1.07061	0.133827	-0.182678	-0.225075	0
520	0	0.32301	0	1.07061	0.133827	-0.182678	-0.225075	0
521	0	0.32301	0	1.07061	0.133827	-0.182678	-0.225075	0
522	0	0.32301	0	1.07061	0.133827	-0.274016	-0.225075	0
523	0	0.484514	0	1.07061	0.133827	-0.274016	-0.225075	0
524	0	0.484514	0	1.07061	0.133827	-0.274016	-0.225075	0
525	0	0.484514	0	1.07061	0.133827	-0.274016	-0.225075	0
526	0	0.484514	0	1.07061	0.133827	-0.274016	-0.225075	0
527	0	0.484514	0	1.07061	0.133827	-0.274016	-0.225075	0
528	0	0.484514	0	1.07061	0.133827	-0.274016	-0.225075	0
529	0	0.484514	0	1.07061	0.133827	-0.274016	-0.225075	0
530	0	0.484514	0	1.07061	0.133827	-0.274016	-0.225075	0
531	0	0.484514	0	1.07061	0.133827	-0.274016	-0.225075	0
532	0	0.484514	0	0.936787	0.133827	-0.274016	-0.225075	0
533	0	0.32301	0	0.40148	0.133827	-0.274016	-0.225075	0
534	0	0.161505	0	0	0	-0.091339	-0.225075	0
535	0	0.161505	0	0	0	-0.091339	0	0
536	0	0.161505	0	0	0	-0.091339	0	0
537	0	0.161505	0	0	0	-0.091339	0	0
538	0	0.161505	0	0	0	-0.091339	0	0
539	0	0.161505	0	0	0	-0.091339	0	0
540	0	0.161505	0	0	0	-0.091339	0	0
541	0	0.161505	0	0	0	-0.091339	0	0
542	0	0.161505	0	0	0	-0.091339	0	0
543	0	0.161505	0	0	0	0	0	0
544	0	0	0	0	0	0	0	0
545	0	0	0	0	0	0	0	0
546	0	0	0	0	0	0	0	0
547	0	0	0	0	0	0	0	0
548	0	0	0	0	0	0	0	0
549	0	0	0	0	0	0	0	0
550	0	0	0	0	0	0	0	0
551	0	0	0	0	0	0	0	0
552	0	0	0	0	0	0	0	0
553	0	0	0	0	0	0	0	0
554	0	0	0	0	0	0	0	0
555	0	0	0	0	0	0	0	0
556	0	0	0	0	0	0	0	0
557	0	0	0	0	0	0	0	0
558	0	0	0	0	0	0	0	0
559	0	0	0	0.535307	0	0	0	0
560	0.091339	0.161505	0	0.535307	0	0	0	0
561	0.365355	0.32301	0.225075	0.669134	0	0	0	0
562	0.365355	0.32301	0.225075	0.669134	0	0	0	0
563	0.365355	0.32301	0.225075	0.669134	0	0	0	0
564	0.365355	0.32301	0.225075	0.669134	0	0	0	0
565	0.365355	0.32301	0.225075	0.669134	0	0	0	0
566	0.365355	0.32301	0.225075	0.669134	0	0	0	0
567	0.365355	0.32301	0.225075	0.669134	0.133827	-0.091339	0	0
568	0.365355	0.32301	0.225075	0.669134	0.133827	-0.091339	0	0
569	0.365355	0.32301	0.225075	0.669134	0.133827	-0.091339	0	0
570	0.365355	0.32301	0.675226	0.669134	0.133827	-0.091339	0	0
571	0.365355	0.32301	0.675226	1.07061	0.133827	-0.091339	0	0
572	0.365355	0.32301	0.675226	1.07061	0.133827	-0.091339	0	0
573	0.365355	0.484514	0.675226	1.07061	0.133827	-0.091339	0	0
574	0.456694	0.484514	0.900302	1.07061	0.133827	-0.091339	0	0
575	0.456694	0.484514	0.900302	1.07061	0.133827	-0.091339	0	0
576	0.456694	0.484514	1.12538	1.07061	0.133827	-0.091339	0	0
577	0.456694	0.484514	1.12538	1.07061	0.133827	-0.091339	0	0
578	0.548033	0.484514	1.12538	1.07061	0.133827	-0.091339	0	0
579	0.548033	0.484514	1.12538	1.07061	0.133827	-0.091339	0	0
580	0.548033	0.484514	1.35045	0.535307	0.133827	-0.091339	0	0
581	0.456694	0.32301	1.35045	0.535307	0.133827	-0.091339	0	0
582	0.182678	0.161505	1.12538	0.669134	0.133827	-0.182678	0	0
583	0.274016	0.161505	1.12538	0.669134	8.29726	-5.38899	-11.7039	-5.49116
584	0.274016	0.161505	1.12538	0.669134	36.6685	-11.2347	-33.3112	-10.8208
585	0.274016	0.161505	1.12538	0.669134	37.3376	-11.5087	-35.3368	-11.4668
586	0.274016	0.161505	1.12538	0.669134	37.3376	-11.5087	-36.0121	-11.4668
587	0.274016	0.161505	1.12538	0.669134	37.3376	-11.5087	-36.0121	-11.4668
588	0.274016	0.161505	1.12538	0.669134	37.2038	-11.4174	-36.0121	-11.4668
589	0.274016	0.161505	1.12538	0.669134	37.2038	-11.4174	-36.0121	-11.4668
590	0.274016	0.161505	1.12538	0.669134	37.2038	-11.4174	-36.0121	-11.4668
591	0.274016	0.161505	0.675226	0.669134	37.2038	-11.4174	-36.0121	-11.4668
592	0.365355	0.32301	0.900302	0.80296	37.2038	-11.6	-36.0121	-11.4668
593	0.365355	0.32301	0.900302	1.47209	37.2038	-11.6	-36.0121	-11.4668
594	0.365355	0.161505	0.900302	1.60592	37.2038	-11.6914	-36.0121	-11.4668
595	0.456694	0.32301	2.02568	2.14123	37.873	-11.6914	-37.1374	-11.4668
596	0.456694	0.484514	2.02568	2.67653	39.0774	-11.7827	-37.5876	-11.4668
597	0.456694	0.484514	1.8006	2.81036	40.2818	-12.1481	-38.4879	-11.4668
598	0.548033	0.484514	1.8006	2.81036	40.2818	-12.1481	-38.713	-11.4668
599	0.456694	0.484514	1.8006	2.94419	40.4157	-12.5134	-38.713	-11.4668
600	0.456694	0.484514	1.8006	2.94419	40.4157	-12.6048	-38.713	-11.4668
601	0.456694	0.484514	1.57553	2.94419	40.4157	-12.6048	-38.713	-11.4668
602	0.456694	0.484514	1.57553	2.94419	40.4157	-12.6048	-38.713	-11.4668
603	0.456694	0.484514	1.57553	2.67653	40.4157	-12.5134	-38.713	-11.4668
604	0.365355	0.484514	1.57553	2.67653	32.2522	-7.3071	-27.0091	-5.97568
605	0.365355	0.484514	1.57553	2.67653	3.88097	-1.46142	-5.40181	-0.646019
606	0.365355	0.484514	1.57553	2.67653	3.21184	-1.1874	-3.37613	0
607	0.365355	0.484514	1.57553	2.81036	3.21184	-1.1874	-2.70091	0
608	0.365355	0.484514	1.57553	2.81036	3.21184	-1.27874	-2.70091	0
609	0.365355	0.484514	1.57553	2.81036	3.21184	-1.27874	-2.70091	0
610	0.365355	0.484514	1.57553	2.81036	3.21184	-1.27874	-2.70091	0
611	0.365355	0.484514	1.8006	2.81036	3.21184	-1.27874	-2.70091	0
612	0.365355	0.484514	1.8006	2.81036	3.21184	-1.27874	-2.70091	0
613	0.274016	0.32301	1.57553	2.27505	3.21184	-1.1874	-2.70091	0
614	0.274016	0.32301	1.57553	1.60592	3.21184	-1.1874	-2.70091	-0.161505
615	0.274016	0.32301	1.57553	1.47209	3.34567	-1.09607	-2.92598	-0.161505
616	0.091339	0.161505	0.225075	0.936787	2.67653	-1.09607	-1.8006	-0.161505
617	0.091339	0	0.225075	0.40148	1.47209	-1.00473	-1.35045	-0.161505
618	0.091339	0	0.225075	0.267653	0.267653	-0.639372	-0.450151	-0.161505
619	0	0	0.225075	0.267653	0.267653	-0.639372	-0.225075	-0.161505
620	0	0	0.225075	0.133827	0.133827	-0.274016	-0.225075	-0.32301
621	0	0	0.225075	0.133827	0.40148	-0.182678	-0.225075	-0.32301
622	0	0	0.225075	0.133827	0.40148	-0.182678	-0.225075	-0.32301
623	0.091339	0	0.225075	0.133827	0.40148	-0.182678	-0.225075	-0.32301
624	0.091339	0	0.225075	0.133827	0.40148	-0.182678	-0.225075	-0.32301
625	0.091339	0	0.225075	0.133827	0.40148	-0.182678	-0.225075	-0.32301
626	0.091339	0	0.225075	0.133827	0.40148	-0.182678	-0.225075	-0.32301
627	0.091339	0	0.225075	0.133827	0.40148	-0.182678	-0.225075	-0.32301
628	1.09607	0.646019	1.57553	0.936787	0.40148	-0.182678	-0.225075	-0.32301
629	2.46615	1.13053	5.17673	2.94419	0.40148	-0.091339	-0.225075	-0.32301
630	3.01418	1.45354	6.30211	3.34567	0.40148	-0.091339	-0.225075	-0.32301
631	3.47087	1.45354	6.75226	3.61332	0.40148	-0.091339	-0.225075	-0.32301
632	3.56221	1.77655	6.75226	3.74715	0.40148	-0.091339	-0.225075	-0.32301
633	4.84096	2.74558	9.67824	5.08542	0.40148	-0.091339	-0.225075	-0.32301
634	10.4126	7.26771	27.6843	16.8622	0.40148	0	-0.225075	-0.32301
635	11.326	7.75223	29.0347	19.0034	0.40148	0	-0.225075	-0.161505
636	11.326	7.75223	29.0347	19.0034	0.267653	0	0	-0.161505
637	11.326	7.75223	29.0347	19.0034	0.267653	0	0	-0.161505
638	11.326	7.75223	29.0347	19.0034	0.267653	0	0	-0.161505
639	11.326	7.75223	29.0347	19.0034	0.267653	0	0	-0.161505
640	11.326	7.75223	29.0347	19.0034	0.267653	0	0	-0.161505
641	11.326	7.75223	29.0347	19.0034	0.267653	0	0	0
642	11.326	7.75223	29.0347	19.0034	0	0	0	0
643	11.326	7.75223	29.0347	19.0034	0	0	0	0
644	11.2347	7.75223	29.0347	19.0034	0	0	-0.450151	-0.161505
645	11.2347	7.75223	29.0347	19.0034	0.40148	-0.274016	-0.450151	-0.969029
646	11.2347	7.75223	29.0347	19.0034	0.40148	-0.274016	-0.450151	-1.13053
647	11.2347	7.75223	29.0347	19.0034	0.40148	-0.274016	-0.450151	-1.13053
648	11.2347	7.75223	29.0347	19.0034	0.40148	-0.274016	-0.450151	-1.13053
649	10.2299	7.10621	27.6843	18.0666	0.40148	-0.274016	-0.450151	-1.13053
650	8.85986	6.6217	24.0831	16.0592	0.40148	-0.365355	-0.450151	-1.13053
651	8.31183	6.29869	22.9577	15.6577	0.40148	-0.365355	-0.450151	-1.13053
652	7.85514	6.29869	22.5075	15.3901	0.40148	-0.365355	-0.450151	-1.13053
653	7.7638	5.97568	22.2825	15.2562	0.40148	-0.365355	-0.450151	-1.13053
654	6.48506	5.00665	19.3565	13.918	0.40148	-0.365355	-0.450151	-1.13053
655	0.913388	0.484514	1.35045	2.14123	0.40148	-0.365355	-0.450151	-1.13053
656	0	0	0	0	0.40148	-0.365355	-0.450151	-1.13053
657	0	0	0	0	0.40148	-0.365355	-0.450151	-1.13053
658	0	0	0	0	0.40148	-0.365355	-0.450151	-1.13053
659	0	0	0	0	0.40148	-0.365355	-0.450151	-1.13053
660	0	0	0	0	0.40148	-0.365355	-0.450151	-1.13053
661	0	0	0	0	0.40148	-0.365355	-0.450151	-1.13053
662	0	0	0	0	0.40148	-0.365355	-0.450151	-1.13053
663	0	0	0	0	0.40148	-0.365355	-0.450151	-1.13053
664	0	0	0	0	0.40148	-0.73071	-0.675226	-1.29204
665	0	0	0	0	0.40148	-0.73071	-0.225075	-1.13053
666	0	0	0	0	0	-0.456694	-0.225075	-0.32301
667	0	0	0	0	0	-0.456694	-0.225075	-0.161505
668	0	0	0	0	0	-0.456694	-0.225075	-0.161505
669	0	0	0	0	0	-0.456694	-0.225075	-0.161505
670	0	0	0	0	0	-0.456694	-0.225075	-0.161505
671	0	0	0	0	0	-0.365355	-0.225075	-0.161505
672	0	0	0	0	0	-0.365355	-0.225075	-0.161505
673	0	0	0	0	0	-0.365355	-0.225075	-0.161505
674	0	0	0	0	0	-0.365355	-0.225075	-0.161505
675	0	0	0	0	0	-0.365355	-0.225075	-0.161505
676	0	0	0	0	0	-0.365355	-0.225075	-0.161505
677	0	0	0	0	0	-0.365355	-0.225075	-0.161505
678	0	0	0	0	0	-0.365355	-0.225075	-0.161505
679	0	0	0	0	0	-0.365355	-0.225075	-0.161505
680	0	0	0	0	0	-0.365355	-0.225075	-0.161505
681	0	0	0	0	0	-0.365355	-0.225075	-0.161505
682	0	0	0	0	0	-0.365355	-0.225075	-0.161505
683	0	0	0	0	0	-0.365355	-0.225075	-0.161505
684	0	0	0	0	0	-0.365355	-0.225075	-0.161505
685	0	0	0	0	0	0	0	0
686	0	0	0	0	0	0	0	0
687	0	0	0	0	0.133827	-0.182678	-0.450151	0
688	0	0	0	0	0.40148	-0.182678	-1.57553	-0.161505
689	0	0	0	0	6.28986	-5.48033	-9.67824	-5.32966
690	0	0	0	0	16.5945	-10.8693	-24.3081	-10.0133
691	0	0	0	0	19.5387	-13.2441	-29.935	-12.7589
692	0	0	0	0	19.9402	-13.2441	-31.2855	-12.7589
693	0	0	0	0	19.9402	-13.2441	-32.1858	-12.7589
694	0	0	0	0	21.0108	-13.8835	-32.861	-13.0819
695	0	0	0	0	21.0108	-13.8835	-32.861	-13.0819
696	0	0	0	0	21.0108	-13.8835	-32.861	-13.0819
697	0	0	0	0	21.0108	-13.8835	-32.861	-13.0819
698	0	0	0	0	21.0108	-13.8835	-32.861	-13.0819
699	3.10552	1.77655	6.97734	4.55011	21.0108	-13.8835	-32.861	-13.0819
700	6.1197	4.84514	24.7583	11.3753	21.0108	-13.8835	-32.861	-13.0819
701	6.1197	4.84514	24.7583	11.3753	21.0108	-13.8835	-32.861	-13.0819
702	6.1197	4.84514	24.7583	11.3753	21.0108	-13.8835	-32.861	-13.0819
703	6.1197	4.84514	24.7583	11.3753	21.0108	-13.8835	-32.861	-13.0819
704	6.1197	4.84514	24.7583	11.5091	21.0108	-13.8835	-32.861	-13.0819
705	6.1197	4.84514	24.7583	11.5091	21.0108	-13.8835	-32.861	-13.0819
706	6.1197	4.84514	24.7583	11.5091	21.0108	-13.8835	-32.861	-13.0819
707	6.1197	4.84514	24.7583	11.5091	21.0108	-13.8835	-32.861	-13.0819
708	6.1197	4.84514	24.7583	11.5091	20.877	-13.7008	-32.4109	-13.0819
709	6.1197	4.84514	24.7583	11.5091	20.6093	-13.7008	-31.2855	-12.9204
710	6.1197	4.84514	24.7583	11.5091	14.7209	-8.40317	-23.1828	-7.75223
711	6.1197	4.84514	24.9834	11.6429	4.41628	-3.01418	-8.55287	-3.06859
712	6.1197	4.84514	25.4335	11.6429	1.47209	-0.639372	-2.92598	-0.32301
713	6.1197	4.84514	25.4335	11.6429	1.07061	-0.639372	-1.57553	-0.32301
714	6.1197	4.84514	25.8837	11.7767	1.07061	-0.639372	-0.675226	-0.32301
715	6.1197	4.84514	25.8837	11.7767	0	0	0	0
716	6.1197	4.84514	25.8837	11.7767	0.133827	0	0	0
717	6.1197	4.84514	25.8837	11.7767	0.133827	0	-0.225075	0
718	6.1197	4.84514	25.8837	11.7767	0.133827	-0.091339	-0.450151	0
719	6.21104	4.84514	25.8837	11.7767	0.133827	-0.091339	-0.450151	0
720	3.19686	3.06859	19.3565	7.62812	0.133827	-0.091339	-0.450151	0
721	0.182678	0	1.57553	0.80296	0.133827	-0.091339	-0.450151	0
722	0.182678	0	1.57553	0.80296	0.133827	-0.091339	-0.450151	0
723	0.182678	0	1.57553	0.80296	0.133827	-0.091339	-0.450151	0
724	0.182678	0	1.57553	0.80296	0.133827	-0.091339	-0.450151	0
725	0.182678	0	1.57553	0.669134	0.267653	-0.091339	-0.450151	0
726	0.182678	0	1.57553	0.669134	0.267653	-0.182678	-0.675226	0
727	0.182678	0	1.57553	0.669134	0.40148	-0.182678	-0.675226	0
728	0.182678	0	1.57553	0.669134	0.40148	-0.182678	-0.675226	0
729	0.182678	0	1.57553	0.669134	0.40148	-0.182678	-0.675226	0
730	0.182678	0	1.57553	0.669134	0.40148	-0.182678	-0.675226	0
731	0.182678	0	1.57553	0.669134	0.40148	-0.182678	-0.675226	0
732	0.182678	0	1.35045	0.535307	0.40148	-0.182678	-0.675226	0
733	0.182678	0	0.900302	0.535307	0.40148	-0.182678	-0.675226	0
734	0.182678	0	0.900302	0.535307	0.40148	-0.182678	-0.675226	0
735	0.182678	0	0.450151	0.40148	0.40148	-0.182678	-0.675226	0
736	0.182678	0	0.450151	0.40148	0.40148	-0.182678	-0.675226	0
737	0.182678	0	0.450151	0.40148	0.267653	-0.182678	-0.675226	0
738	0.182678	0	0.450151	0.40148	0.267653	-0.182678	-0.450151	0
739	0.182678	0	0.450151	0.40148	0.267653	-0.091339	-0.225075	0
740	0.091339	0	0.450151	0.40148	0.267653	-0.091339	-0.225075	0
741	0	0	0	0	0.40148	-0.182678	-0.225075	0
742	0	0	0	0	0.535307	-0.639372	-0.225075	0
743	0	0	0	0	0.80296	-0.639372	-0.225075	-0.161505
744	0	0	0	0	0.80296	-0.639372	-0.225075	-0.161505
745	0	0	0	0	0.80296	-0.639372	-0.225075	-0.161505
746	0	0	0	0	0.669134	-0.639372	-0.225075	-0.161505
747	0	0	0	0	0.669134	-0.73071	0	-0.161505
748	0	0	0	0	0.535307	-0.822049	-0.450151	-0.161505
749	0	0	0	0	0.535307	-0.822049	-0.450151	-0.161505
750	0	0	0	0	0.669134	-0.822049	-0.450151	-0.161505
751	0	0	0	0	0.669134	-0.822049	-0.450151	-0.161505
752	0	0	0	0	0.669134	-0.822049	-0.450151	-0.161505
753	0	0	0	0	0.669134	-0.822049	-0.450151	-0.161505
754	0	0	0	0	0.669134	-0.822049	-0.450151	-0.161505
755	0	0	0	0	0.669134	-0.822049	-0.450151	-0.161505
756	0	0	0	0	7.09282	-4.56694	-7.65257	-1.77655
757	0	0	0	0	11.9106	-5.20631	-9.67824	-2.09956
758	0	0	0	0	15.7916	-5.93702	-15.7553	-3.3916
759	0	0	0	0	15.7916	-5.93702	-15.7553	-3.5531
760	0	0	0	0	15.7916	-5.93702	-15.7553	-3.5531
761	0	0	0	0	15.7916	-5.93702	-15.7553	-3.71461
762	0	0	0	0	15.6577	-6.02836	-16.2054	-3.71461
763	0	0	0	0	15.5239	-5.57167	-16.2054	-3.71461
764	0	0	0	0	15.2562	-5.57167	-16.2054	-3.5531
765	0	0	0	0	15.2562	-5.57167	-16.2054	-3.5531
766	0	0	0	0	15.2562	-5.57167	-16.2054	-3.5531
767	0	0	0	0	15.2562	-5.57167	-16.2054	-3.5531
768	0	0	0	0	15.2562	-5.38899	-16.2054	-3.5531
769	0	0	0	0	15.3901	-5.29765	-15.7553	-3.5531
770	0	0	0	0	15.3901	-5.29765	-15.7553	-3.5531
771	0	0	0	0	15.2562	-5.29765	-15.7553	-3.5531
772	0	0	0	0	15.2562	-5.29765	-15.7553	-3.5531
773	0	0	0	0	15.2562	-5.29765	-15.7553	-3.5531
774	0	0	0	0	15.2562	-5.29765	-15.7553	-3.5531
775	0	0	0	0	15.2562	-5.29765	-15.7553	-3.5531
776	0	0	0	0	15.2562	-5.29765	-15.7553	-3.5531
777	0	0	0	0	8.83256	-1.55276	-8.55287	-1.93806
778	0	0	0	0	4.0148	-0.913388	-6.52719	-1.61505
779	0	0	0	0	0.133827	-0.182678	-0.450151	-0.32301
780	0	0	0	0	0.133827	-0.182678	-0.450151	-0.161505
781	0	0	0	0	0.133827	-0.182678	-0.450151	-0.161505
782	0	0	0	0	0.133827	-0.182678	-0.450151	0
783	0	0	0	0	0.133827	0	0	0
784	0	0	0	0	0.133827	0	0	0
785	0	0	0	0	0.133827	0	0	0
786	0	0	0	0	0.133827	0	0	0
787	0	0	0	0	0.133827	0	0	0
788	0	0	0	0	0.133827	0	0	0
789	0	0	0	0	0.133827	0	0	0
790	0	0	0	0	0	0	0	0
791	0	0	0	0	0	0	0	0
792	0	0	0	0	0	0	0	0
793	0	0	0	0	0	0	0	0
794	0	0	0	0	0	0	0	0
795	0	0	0	0.133827	0	0	0	0
796	0	0	0	0.133827	0	0	0	0
797	0	0	0	0.133827	0	-0.091339	0	0
798	0	0	0	0.133827	0	-0.091339	0	0
799	0.091339	0	0	0.535307	0	-0.091339	0	0
800	0.091339	0	0	0.535307	0	-0.091339	0	0
801	0.091339	0	0	0.535307	0	-0.091339	0	0
802	0.091339	0	0	0.535307	0	-0.091339	0	0
803	0.091339	0	0	0.535307	0	-0.091339	0	0
804	0.091339	0	0	0.535307	0	-0.091339	0	0
805	0.091339	0	0	0.535307	0	-0.091339	0	0
806	0.091339	0	0	0.535307	0	-0.091339	0	0
807	0.091339	0	0	0.535307	0	-0.091339	0	0
808	0.091339	0	0	0.535307	0	-0.091339	0	0
809	0.091339	0	0	0.535307	0	-0.091339	0	0
810	0.091339	0	0	0.535307	0	-0.091339	0	0
811	0.091339	0	0	0.535307	0	-0.091339	0	0
812	0.091339	0	0	0.535307	0	-0.091339	0	0
813	0.182678	0	0.450151	0.535307	0	-0.091339	0	0
814	0.182678	0	0.450151	0.535307	0	-0.365355	-0.900302	0
815	0.182678	0	0.450151	0.669134	0	-0.365355	-0.900302	0
816	0.182678	0	0.450151	0.535307	0	-0.365355	-0.900302	0
817	0.182678	0	0.450151	0.535307	0	-0.365355	-0.900302	0
818	0.182678	0	0.450151	0.535307	0	-0.274016	-0.900302	0
819	0.182678	0	0.450151	0.535307	0	-0.365355	-0.900302	0
820	0.091339	0	0.450151	0.133827	0	-0.365355	-0.900302	0
821	0.091339	0	0.450151	0.133827	0	-0.365355	-0.900302	0
822	0.091339	0	0.450151	0.133827	0.133827	-0.365355	-0.900302	0
823	0.091339	0	0.450151	0.133827	0.133827	-0.365355	-0.900302	0
824	0.091339	0	0.450151	0.133827	0.133827	-0.365355	-0.900302	0
825	0.091339	0	0.450151	0.133827	0.133827	-0.365355	-0.900302	0
826	0.091339	0	0.450151	0.133827	0.133827	-0.365355	-0.900302	0
827	0.091339	0	0.450151	0.133827	0.133827	-0.365355	-0.900302	0
828	0.091339	0	0.450151	0.133827	0.133827	-0.365355	-0.900302	0
829	0.091339	0	0.450151	0.133827	0.133827	-0.365355	-0.900302	0
830	0.091339	0	0.450151	0.133827	0.133827	-0.365355	-0.900302	0
831	0.091339	0	0.450151	0.133827	0.133827	-0.365355	-0.900302	0
832	0.091339	0	0.450151	0.133827	0.133827	-0.365355	-0.900302	0
833	0.091339	0	0.450151	0.133827	0.133827	-0.365355	-0.900302	0
834	0	0	0	0.133827	0.133827	-0.365355	-0.900302	0
835	0	0.161505	0	0.133827	0.133827	-0.091339	0	0
836	0.274016	0.161505	0.675226	0.133827	0.133827	-0.091339	0	0
837	0.274016	0.161505	1.35045	0.267653	0.133827	-0.091339	0	0
838	0.274016	0.161505	1.35045	0.267653	0.133827	-0.091339	0	0
839	0.274016	0.161505	1.35045	0.267653	0.133827	-0.091339	0	0
840	0.274016	0.161505	1.35045	0.267653	0.133827	0	0	0
841	0.274016	0.161505	1.35045	0.669134	0.133827	0	0	0
842	0.365355	0.32301	1.57553	1.07061	0.133827	0	0	0
843	0.365355	0.32301	1.57553	1.07061	0	0	0	0
844	0.365355	0.32301	1.57553	1.07061	0	0	0	0
845	0.365355	0.32301	1.57553	1.07061	0	0	0	0
846	0.365355	0.32301	1.57553	1.07061	0	0	0	0
847	0.365355	0.32301	1.57553	1.07061	0	0	0	0
848	0.365355	0.32301	1.57553	1.07061	0	0	0	0
849	0.365355	0.32301	1.57553	1.07061	0	0	0	0
850	0.365355	0.32301	1.57553	1.07061	0	0	0	0
851	0.365355	0.32301	1.57553	1.07061	0	0	0	0
852	0.365355	0.32301	1.57553	1.07061	0.133827	0	0	0
853	0.365355	0.32301	1.57553	1.07061	0.133827	0	0	0
854	0.365355	0.32301	1.57553	1.07061	0.133827	0	0	0
855	0.365355	0.32301	1.57553	1.07061	0.133827	0	0	0
856	0.365355	0.161505	1.57553	1.07061	0.133827	0	0	0
857	0.091339	0.161505	0.900302	0.936787	0.133827	0	0	0
858	0.091339	0.161505	0.225075	0.80296	0.133827	0	0	0
859	0.091339	0.161505	0.225075	0.80296	0.133827	0	0	0
860	0.091339	0.161505	0.225075	0.80296	0.133827	0	0	0
861	0.182678	0.161505	0.225075	0.80296	0.133827	0	0	0
862	0.182678	0.161505	0.225075	0.40148	0.133827	0	0	0
863	0.091339	0	0	0	0.133827	0	0	0
864	0.091339	0	0	0	0.133827	0	0	0
865	0.091339	0	0	0	0.133827	0	0	0
866	0.091339	0	0	0	0.133827	0	-0.225075	0
867	0.091339	0	0	0	0.133827	0	-0.225075	0
868	0.091339	0	0	0	0.133827	0	-0.225075	0
869	0.091339	0	0	0	0.133827	0	-0.225075	0
870	0.091339	0	0	0	0.133827	0	-0.225075	0
871	0.091339	0	0	0	0.133827	0	-0.225075	0
872	0.091339	0	0	0	0.133827	0	-0.225075	0
873	0.091339	0	0	0	0	0	-0.225075	0
874	0.091339	0	0	0	0	0	-0.225075	0
875	0.091339	0	0	0	0	0	-0.225075	0
876	0.091339	0	0	0	0	0	-0.225075	0
877	0.091339	0	0	0	0	0	-0.225075	0
878	0.091339	0	0	0	0	0	-0.225075	0
879	0.091339	0	0	0	0	0	-0.225075	0
880	0.091339	0	0	0	0	0	-0.225075	0
881	0.091339	0	0	0	0	0	-0.225075	0
882	0	0	0	0	0	0	-0.225075	0
883	0	0	0	0	0	0	-0.225075	0
884	0	0	0	0	0	0	-0.225075	0
885	0	0	0	0	0	0	-0.225075	0
886	0	0	0	0	0	0	-0.225075	0
887	0	0	0	0	0	0	0	0
888	0	0	0	0	0	0	0	0
889	0	0	0	0	0	0	0	0
890	0	0	0	0	0	0	0	0
891	0	0	0	0	0	0	0	0
892	0	0	0	0	0	0	0	0
893	0	0	0	0	0	0	0	0
894	0	0	0	0	0	0	0	0
895	0	0	0	0	0	0	0	0
896	0.091339	0	0	0	0	0	0	0
897	0.091339	0	0	0	0	0	0	0
898	0.091339	0	0	0	0	0	0	0
899	0.274016	0	0	0	0	0	0	0
900	0.639372	0	0.225075	0	0	0	0	0
901	2.92284	2.58408	12.3791	5.88837	0	0	0	0
902	3.2882	3.2301	13.5045	6.69133	0	0	0	0
903	3.47087	3.5531	15.5302	7.4943	0	0	0	0
904	4.9323	3.71461	16.8807	8.83256	0	0	0	0
905	5.02363	3.87611	17.3308	8.83256	0	0	0	0
906	5.02363	3.87611	18.006	8.96639	0	0	0	0
907	5.29765	4.19912	18.2311	9.10022	0	0	0	0
908	5.57167	4.19912	19.3565	9.5017	0	0	0	0
909	5.66301	4.19912	19.3565	9.5017	0	0	0	0
910	5.66301	4.19912	19.3565	9.5017	0	-0.091339	0	-0.161505
911	6.21104	5.00665	20.932	10.4385	0.535307	-0.456694	-0.225075	-0.32301
912	6.21104	5.00665	20.932	10.4385	3.61332	-1.09607	-3.37613	-1.93806
913	6.21104	5.00665	20.932	10.4385	4.55011	-1.46142	-4.72658	-1.93806
914	6.21104	5.00665	20.932	10.7061	4.68393	-1.46142	-4.72658	-1.93806
915	6.21104	5.00665	20.932	10.84	4.81776	-1.46142	-4.95166	-1.93806
916	6.21104	5.00665	20.932	10.84	5.62072	-1.55276	-5.40181	-2.26107
917	6.1197	5.00665	20.932	10.84	6.42368	-1.55276	-5.62689	-2.42257
918	6.1197	5.00665	20.932	10.84	7.62812	-1.73544	-6.75226	-2.42257
919	6.1197	5.00665	20.932	10.84	8.0296	-2.10079	-8.10271	-2.58408
920	5.93702	5.00665	21.1571	10.9738	9.10022	-2.74016	-8.10271	-4.36063
921	5.66301	5.16815	20.932	12.0444	9.63552	-3.2882	-8.10271	-5.00665
922	3.37954	2.58408	8.77794	6.15603	9.63552	-3.2882	-8.10271	-5.00665
923	3.01418	1.93806	7.65257	5.35307	9.63552	-3.2882	-8.10271	-5.00665
924	3.01418	1.61505	5.62689	4.55011	9.63552	-3.2882	-8.10271	-5.00665
925	1.55276	1.45354	4.27643	3.21184	9.76935	-3.2882	-8.32779	-5.32966
926	1.46142	1.29204	3.82628	3.21184	9.76935	-3.2882	-8.32779	-5.32966
927	1.46142	1.29204	3.15106	3.21184	9.76935	-3.37954	-8.55287	-5.32966
928	1.1874	0.969029	2.92598	3.07801	9.76935	-3.37954	-8.55287	-5.32966
929	0.913388	0.969029	1.8006	2.67653	9.76935	-3.37954	-8.55287	-5.32966
930	0.822049	0.969029	1.8006	2.67653	9.76935	-3.37954	-8.55287	-5.32966
931	0.822049	0.969029	1.8006	2.67653	9.76935	-3.2882	-8.55287	-5.16815
932	0.274016	0.161505	0.225075	1.73975	9.23404	-2.92284	-8.32779	-5.00665
933	0.274016	0.161505	0.225075	1.73975	6.15603	-2.28347	-5.17673	-3.3916
934	0.274016	0.161505	0.225075	1.73975	5.21924	-1.91812	-3.82628	-3.3916
935	0.274016	0.161505	0.225075	1.47209	5.08542	-1.91812	-3.82628	-3.3916
936	0.274016	0.161505	0.225075	1.33827	4.95159	-1.91812	-3.60121	-3.3916
937	0.274016	0.161505	0.225075	1.33827	4.14863	-1.82678	-3.15106	-3.06859
938	0.274016	0.161505	0.225075	1.33827	3.34567	-1.82678	-2.92598	-2.90709
939	0.274016	0.161505	0.225075	1.33827	2.14123	-1.6441	-1.8006	-2.90709
940	0.274016	0.161505	0.225075	1.33827	1.73975	-1.27874	-0.450151	-2.74558
941	0.274016	0.161505	0	1.20444	0.669134	-0.639372	-0.450151	-0.969029
942	0.182678	0	0	0.133827	0.133827	-0.091339	-0.450151	-0.32301
943	0.182678	0	0.225075	0.267653	0.133827	-0.091339	-0.450151	-0.32301
944	0.182678	0	0.450151	0.535307	0.133827	-0.091339	-0.450151	-0.32301
945	0	0	0.450151	0.535307	0.133827	-0.091339	-0.450151	-0.32301
946	0	0	0.450151	0.535307	0	-0.091339	-0.225075	0
947	0	0	0.450151	1.07061	0	-0.091339	-0.225075	0
948	0	0	0.450151	1.20444	0	0	0	0
949	0	0	0.450151	1.20444	0.133827	0	0	0
950	0	0	0.450151	1.20444	0.40148	0	-1.12538	0
951	0	0	0.450151	1.20444	0.80296	0	-1.35045	-0.32301
952	0	0	0.450151	1.20444	0.80296	0	-1.8006	-0.32301
953	0	0	0.450151	1.20444	0.80296	0	-2.02568	-0.32301
954	0	0	0.450151	1.20444	0.80296	-0.365355	-2.47583	-0.484514
955	0	0	0.450151	1.20444	0.80296	-0.365355	-2.47583	-0.646019
956	0	0	0.450151	1.20444	0.936787	-0.365355	-2.47583	-0.646019
957	0	0	0.450151	1.20444	1.20444	-0.456694	-2.47583	-0.646019
958	0	0	0.450151	1.20444	1.20444	-0.456694	-2.47583	-0.646019
959	0	0	0.450151	1.20444	1.20444	-0.456694	-2.47583	-0.646019
960	0	0	0.450151	1.20444	1.20444	-0.456694	-2.47583	-0.646019
961	0.091339	0	0.450151	1.20444	1.20444	-0.456694	-2.47583	-0.646019
962	0.091339	0	0.450151	1.20444	1.20444	-0.456694	-2.47583	-0.646019
963	0.091339	0	0.450151	1.20444	1.20444	-0.456694	-2.47583	-0.646019
964	0.091339	0	0.225075	1.07061	1.20444	-0.456694	-2.47583	-0.646019
965	0.091339	0	0	0.80296	1.20444	-0.456694	-2.47583	-0.646019
966	0.091339	0	0	0.80296	1.20444	-0.456694	-2.47583	-0.646019
967	0.091339	0	0	0.80296	1.20444	-0.456694	-2.47583	-0.646019
968	0.091339	0	0	0.267653	1.20444	-0.456694	-2.47583	-0.646019
969	0.091339	0	0	0	1.20444	-0.456694	-2.47583	-0.646019
970	0.091339	0	0	0	1.20444	-0.456694	-2.47583	-0.646019
971	0.091339	0	0	0	0.936787	-0.456694	-1.35045	-0.646019
972	0.091339	0	0	0	0.535307	-0.456694	-1.12538	-0.32301
973	0.091339	0	0	0	0.669134	-0.456694	-0.675226	-0.32301
974	0.091339	0	0	0	0.669134	-0.456694	-0.450151	-0.32301
975	0.091339	0	0	0	0.669134	-0.091339	0	-0.161505
976	0.091339	0	0	0	0.669134	-0.091339	0	0
977	0.091339	0	0	0	0.535307	-0.091339	0	0
978	0.091339	0	0	0	0.267653	0	0	0
979	0.091339	0	0	0	0.267653	0	0	0
980	0.091339	0	0	0	0.267653	0	0	0
981	0.091339	0	0	0	0.267653	0	0	0
982	0	0	0	0	0.267653	0	0	0
983	0	0	0	0	0.267653	0	0	0
984	0	0	0	0	0.267653	0	0	0
985	0	0	0	0	0.267653	0	-0.225075	0
986	0	0	0	0	0.267653	0	-0.225075	0
987	0	0	0	0	0.267653	0	-0.225075	0
988	0	0	0	0	0.267653	0	-0.225075	0
989	0	0	0	0	0.267653	0	-0.225075	0
990	0	0	0	0	0.267653	0	-0.225075	0
991	0	0	0	0	0.133827	0	-0.225075	0
992	0	0	0	0	0.133827	0	-0.225075	0
993	0	0	0	0	0.133827	0	-0.225075	0
994	0	0	0	0	0	0	-0.225075	0
995	0	0	0	0	0	0	-0.225075	0
996	0	0	0	0	0	0	-0.225075	0
997	0	0	0	0	0	0	-0.225075	0
998	0.274016	0.161505	0.225075	0.133827	0.133827	0	-0.225075	0
999	0.274016	0.161505	0.225075	0.133827	0.133827	0	-0.225075	0
1000	0.274016	0.161505	0.225075	0.133827	0.133827	0	-0.225075	0
1001	0.365355	0.161505	0.225075	0.133827	0.133827	0	-0.225075	0
1002	1.00473	0.646019	0.900302	0.936787	0.133827	0	-0.225075	0
1003	4.65828	3.3916	7.87764	8.56491	0.133827	0	-0.225075	0
1004	22.378	13.2434	46.8157	48.5791	0.133827	0	-0.225075	0
1005	23.9308	13.8894	52.4426	51.6571	0.133827	0	-0.225075	0
1006	25.0268	14.5354	54.4683	54.3336	0.133827	0	0	0
1007	25.4835	14.6969	55.3686	54.8689	0.133827	0	0	0
1008	26.3056	15.0199	57.1692	55.2704	0.133827	0	0	-0.161505
1009	26.3056	15.0199	57.1692	55.2704	0.267653	0	0	-0.161505
1010	26.3056	15.1814	57.1692	55.2704	0.267653	0	0	-0.161505
1011	26.3056	15.1814	57.1692	55.2704	0.267653	0	0	-0.161505
1012	26.3056	15.1814	57.1692	55.2704	0.267653	0	0	-0.161505
1013	26.3056	15.1814	57.1692	55.2704	0.267653	0	-0.450151	-0.161505
1014	26.3056	15.1814	57.1692	55.2704	0.267653	0	-0.450151	-0.161505
1015	26.3056	15.1814	57.1692	55.2704	0.267653	0	-0.450151	-0.161505
1016	26.3056	15.1814	57.1692	55.2704	0.267653	0	-0.450151	-0.161505
1017	26.3056	15.1814	57.1692	55.2704	0.267653	0	-0.450151	-0.161505
1018	26.3056	15.1814	57.1692	55.2704	0.267653	0	-0.450151	-0.161505
1019	26.0316	15.0199	56.9441	55.1366	0.133827	0	-0.450151	-0.161505
1020	26.0316	15.0199	56.9441	55.1366	0.267653	-0.091339	-0.675226	-0.161505
1021	26.0316	15.0199	56.9441	55.1366	0.267653	-0.091339	-0.675226	-0.32301
1022	25.9402	15.0199	56.9441	55.1366	0.267653	-0.091339	-0.675226	-0.32301
1023	25.3008	14.5354	56.2689	54.3336	0.267653	-0.091339	-0.675226	-0.32301
1024	21.6473	11.7898	49.2915	46.7055	0.267653	-0.091339	-0.675226	-0.484514
1025	3.92757	1.93806	10.5785	6.69133	0.40148	-0.182678	-1.12538	-0.646019
1026	2.37481	1.29204	4.95166	3.61332	0.80296	-0.548033	-1.57553	-0.969029
1027	1.27874	0.646019	2.92598	0.936787	0.80296	-0.548033	-1.57553	-0.969029
1028	0.822049	0.484514	2.02568	0.40148	0.80296	-0.548033	-1.57553	-0.969029
1029	0	0.161505	0.225075	0	0.80296	-0.548033	-1.57553	-0.807524
1030	0	0.161505	0.225075	0	0.669134	-0.548033	-1.57553	-0.807524
1031	0	0	0.225075	0	0.669134	-0.548033	-1.57553	-0.807524
1032	0.091339	0	0.225075	0.133827	0.669134	-0.548033	-1.57553	-0.807524
1033	0.091339	0	0.450151	0.133827	0.669134	-0.548033	-1.57553	-0.807524
1034	0.091339	0	0.450151	0.267653	0.669134	-0.548033	-1.12538	-0.807524
1035	0.091339	0	0.450151	0.267653	0.669134	-0.548033	-1.35045	-0.807524
1036	0.548033	0.484514	0.900302	0.40148	0.669134	-0.548033	-1.35045	-0.807524
1037	0.822049	1.93806	4.05136	2.94419	0.669134	-0.548033	-1.35045	-0.807524
1038	1.00473	1.93806	4.27643	3.07801	0.669134	-0.548033	-1.35045	-0.807524
1039	1.00473	1.93806	4.27643	3.07801	0.669134	-0.548033	-1.35045	-0.807524
1040	1.37008	1.93806	4.27643	3.07801	0.936787	-0.639372	-1.35045	-0.807524
1041	1.37008	1.93806	4.27643	3.07801	0.80296	-0.548033	-1.12538	-0.807524
1042	1.37008	1.93806	4.72658	3.07801	0.80296	-0.548033	-1.12538	-0.646019
1043	1.37008	1.93806	4.72658	3.34567	0.80296	-0.548033	-1.12538	-0.646019
1044	1.37008	1.93806	4.72658	3.34567	0.936787	-0.73071	-1.35045	-0.646019
1045	1.37008	1.93806	4.72658	3.34567	1.47209	-1.1874	-2.47583	-0.969029
1046	1.37008	1.93806	4.50151	3.34567	4.81776	-2.10079	-4.50151	-1.29204
1047	1.37008	1.93806	4.50151	3.47949	14.7209	-9.31656	-17.3308	-7.75223
1048	1.55276	2.09956	5.17673	3.88097	15.1224	-9.4079	-17.3308	-7.75223
1049	1.55276	2.26107	5.40181	4.14863	15.3901	-9.49924	-18.006	-7.75223
1050	1.55276	2.26107	5.40181	4.14863	15.3901	-9.49924	-18.006	-7.75223
1051	1.55276	2.26107	5.40181	4.14863	15.3901	-9.49924	-18.006	-7.75223
1052	1.55276	2.26107	5.40181	4.28245	16.0592	-9.59057	-18.2311	-7.75223
1053	1.46142	2.26107	5.40181	4.14863	16.5945	-9.68191	-18.2311	-7.75223
1054	1.46142	2.26107	5.17673	4.14863	16.5945	-9.68191	-18.4562	-7.91373
1055	1.46142	2.26107	5.17673	4.0148	16.5945	-10.0473	-18.4562	-7.91373
1056	1.46142	2.26107	5.17673	4.0148	16.5945	-10.2299	-18.2311	-8.07524
1057	1.00473	1.77655	4.72658	3.88097	16.5945	-10.2299	-18.2311	-8.07524
1058	0.73071	0.32301	1.57553	1.33827	16.5945	-10.2299	-18.2311	-8.07524
1059	0.548033	0.32301	1.35045	1.20444	17.2636	-10.3213	-18.6813	-8.07524
1060	0.548033	0.32301	1.35045	1.20444	17.2636	-10.3213	-18.6813	-8.07524
1061	0.274016	0.32301	1.35045	1.20444	16.996	-10.2299	-18.6813	-8.07524
1062	0.274016	0.32301	1.35045	1.47209	16.996	-10.2299	-18.6813	-8.07524
1063	0.274016	0.32301	0.900302	1.47209	16.996	-10.2299	-18.6813	-8.07524
1064	0.274016	0.32301	0.900302	1.20444	16.996	-10.2299	-18.6813	-8.07524
1065	0.274016	0.484514	0.900302	1.20444	16.8622	-10.0473	-18.4562	-8.07524
1066	0.639372	0.484514	0.900302	1.20444	16.3269	-9.68191	-17.3308	-7.59072
1067	0.639372	0.484514	0.900302	1.20444	12.8474	-8.67719	-14.855	-7.10621
1068	0.639372	0.484514	0.900302	1.07061	2.54271	-1.09607	-1.57553	-0.32301
1069	0.456694	0.32301	0.225075	0.669134	2.14123	-1.00473	-1.57553	-0.32301
1070	0.456694	0.161505	0	0.40148	1.87357	-0.913388	-0.900302	-0.32301
1071	0.456694	0.161505	0	0.40148	1.87357	-0.913388	-0.900302	-0.32301
1072	0.456694	0.161505	0	0.40148	1.87357	-0.913388	-0.900302	-0.32301
1073	0.456694	0.161505	0	0.267653	1.20444	-0.822049	-0.675226	-0.32301
1074	0.456694	0.161505	0	0.267653	0.669134	-0.73071	-0.675226	-0.32301
1075	0.456694	0.161505	0	0.267653	0.669134	-0.73071	-0.450151	-0.161505
1076	0.456694	0.161505	0	0.267653	0.669134	-0.365355	-0.450151	-0.161505
1077	0.456694	0.161505	0	0.267653	0.669134	-0.274016	-0.450151	0
1078	0.456694	0.161505	0	0.267653	0.669134	-0.274016	-0.675226	-0.161505
1079	0.456694	0.161505	0	0.267653	3.61332	-1.00473	-1.57553	-0.484514
1080	0.456694	0.161505	0	0.267653	14.4533	-6.02836	-13.5045	-5.49116
1081	0.456694	0.161505	0	0.267653	14.8548	-6.21104	-13.5045	-5.65267
1082	0.365355	0.161505	0	0.267653	15.3901	-6.66773	-14.4048	-5.65267
1083	0.365355	0.161505	0	0	16.996	-7.58112	-15.9804	-6.29869
1084	0.365355	0.161505	0	0	18.4681	-9.04254	-16.6556	-7.10621
1085	0.365355	0.161505	0	0	19.271	-9.4079	-17.781	-8.07524
1086	0.365355	0	0	0.133827	21.1446	-9.4079	-18.2311	-8.07524
1087	0	0	0.225075	0.133827	21.6799	-9.31656	-18.6813	-8.39825
1088	0	0	0.225075	0.267653	22.7505	-10.0473	-21.1571	-9.36728
1089	0	0	0.225075	0.267653	22.7505	-10.3213	-21.1571	-9.36728
1090	0	0	0.225075	0.267653	22.7505	-10.3213	-21.1571	-9.52878
1091	0	0	0.225075	0.40148	22.7505	-10.3213	-21.1571	-9.52878
1092	0	0	0.225075	0.40148	22.7505	-10.3213	-21.1571	-9.52878
1093	0	0	0.225075	0.40148	22.7505	-10.3213	-21.1571	-9.52878
1094	0	0	0.225075	0.40148	22.7505	-10.3213	-21.1571	-9.52878
1095	0	0	0.225075	0.40148	22.7505	-10.3213	-21.1571	-9.52878
1096	0	0	0.225075	0.40148	22.7505	-10.3213	-21.1571	-9.52878
1097	0	0	0.225075	0.40148	22.7505	-10.3213	-21.1571	-9.52878
1098	0	0	0.225075	0.40148	22.7505	-10.2299	-21.1571	-9.52878
1099	0	0	0.225075	0.40148	22.7505	-10.2299	-20.932	-9.36728
1100	0	0	0.225075	0.40148	19.8063	-9.49924	-20.0317	-9.04427
1101	0	0	0.225075	0.40148	8.29726	-4.38426	-7.65257	-4.03762
1102	0	0	0.225075	0.40148	7.89578	-4.20158	-7.65257	-3.87611
1103	0	0	0.225075	0.40148	7.36047	-3.74489	-6.75226	-3.87611
1104	0.182678	0	0.225075	0.40148	5.75455	-2.8315	-5.17673	-3.2301
1105	0.182678	0	0.225075	0.40148	4.28245	-1.37008	-4.50151	-2.42257
1106	0.182678	0	0.225075	0.40148	3.47949	-1.00473	-3.37613	-1.45354
1107	0.182678	0	0.225075	0.267653	1.60592	-1.00473	-2.92598	-1.45354
1108	0.182678	0	0	0.267653	1.07061	-1.00473	-2.47583	-1.13053
1109	0.274016	0.161505	0.675226	0.40148	0	-0.274016	0	-0.161505
1110	0.548033	0.646019	0.900302	0.80296	0	0	0	-0.161505
1111	0.639372	0.646019	1.12538	0.936787	0	0	0	0
1112	1.27874	0.646019	1.35045	1.47209	0	0	0	0
1113	1.27874	0.646019	1.35045	1.47209	0	0	0	0
1114	1.37008	0.969029	1.35045	2.0074	0	0	0	0
1115	1.37008	0.969029	1.35045	2.0074	0	0	0	0
1116	1.37008	0.969029	1.35045	2.0074	0.40148	0	-0.450151	-0.161505
1117	1.37008	0.969029	1.35045	2.0074	0.669134	-0.456694	-1.57553	-0.484514
1118	1.37008	0.969029	1.35045	2.0074	1.20444	-0.822049	-1.57553	-0.484514
1119	1.37008	0.969029	1.35045	2.0074	1.20444	-0.822049	-1.57553	-0.484514
1120	1.37008	0.969029	1.35045	2.0074	1.20444	-0.822049	-1.57553	-0.484514
1121	1.37008	0.969029	1.35045	2.0074	1.20444	-0.822049	-1.57553	-0.484514
1122	1.37008	0.969029	1.35045	2.0074	1.20444	-0.822049	-1.57553	-0.484514
1123	1.37008	0.969029	1.35045	2.0074	1.20444	-0.822049	-1.57553	-0.484514
1124	1.37008	0.969029	1.35045	2.0074	1.20444	-0.822049	-1.57553	-0.484514
1125	1.1874	0.969029	1.35045	2.0074	1.20444	-0.822049	-1.57553	-0.484514
1126	1.1874	0.969029	1.35045	2.0074	1.20444	-0.822049	-1.57553	-0.484514
1127	1.1874	0.969029	1.35045	2.0074	1.20444	-0.822049	-1.57553	-0.484514
1128	1.1874	0.969029	1.35045	2.0074	1.20444	-0.822049	-1.57553	-0.484514
1129	1.1874	0.969029	1.35045	2.0074	1.20444	-0.822049	-1.57553	-0.484514
1130	1.09607	0.807524	0.675226	1.73975	1.20444	-0.822049	-1.57553	-0.484514
1131	0.822049	0.32301	0.450151	1.33827	1.20444	-0.822049	-1.57553	-0.484514
1132	0.73071	0.32301	0.225075	1.20444	1.20444	-0.822049	-1.57553	-0.484514
1133	0.091339	0.32301	0.675226	0.936787	1.20444	-0.822049	-1.57553	-0.484514
1134	0.548033	0.484514	2.02568	1.73975	1.20444	-0.822049	-1.57553	-0.484514
1135	1.1874	0.32301	2.70091	1.87357	1.20444	-0.822049	-1.57553	-0.484514
1136	1.1874	0.32301	2.70091	1.87357	1.20444	-0.822049	-1.57553	-0.484514
1137	1.1874	0.32301	2.70091	1.87357	0.80296	-0.822049	-1.12538	-0.32301
1138	1.1874	0.32301	2.70091	2.0074	0.535307	-0.365355	0	0
1139	1.1874	0.32301	2.70091	2.0074	0	0	0	0
1140	1.1874	0.32301	2.70091	2.0074	0	0	0	0
1141	1.1874	0.32301	2.70091	2.14123	0	0	0	0
1142	2.00945	1.29204	3.82628	3.47949	0	0	0	0
1143	3.2882	2.42257	5.40181	4.41628	0	0	0	0
1144	4.20158	3.5531	5.85196	4.95159	0	0	0	0
1145	4.65828	4.19912	10.3535	8.83256	0	0	-0.225075	0
1146	5.02363	4.36063	11.7039	9.10022	0	0	-0.225075	-0.32301
1147	5.75434	4.84514	13.5045	10.1708	0	-0.182678	-0.225075	-0.646019
1148	5.93702	5.00665	13.9547	10.4385	0	-0.182678	-0.225075	-0.646019
1149	8.12915	6.7832	17.1057	11.6429	0	-0.182678	-0.225075	-0.646019
1150	8.49451	6.94471	17.781	11.9106	0	-0.182678	-0.225075	-0.646019
1151	8.49451	6.94471	17.781	11.9106	0	-0.182678	-0.225075	-0.646019
1152	8.49451	6.94471	17.781	11.9106	0	-0.182678	-0.225075	-0.646019
1153	8.49451	6.94471	17.781	11.9106	0	-0.182678	-0.225075	-0.646019
1154	8.49451	6.94471	17.1057	11.7767	0	-0.182678	-0.225075	-0.646019
1155	8.03782	6.7832	15.9804	10.9738	0	-0.182678	-0.225075	-0.646019
1156	7.3071	6.6217	15.3051	10.3047	0	-0.182678	-0.225075	-0.646019
1157	7.3071	6.6217	15.3051	10.3047	0	-0.182678	-0.225075	-0.646019
1158	7.48978	6.7832	15.5302	10.4385	0	-0.182678	-0.225075	-0.646019
1159	7.48978	6.7832	15.5302	10.3047	0	-0.182678	-0.225075	-0.646019
1160	7.58112	6.94471	15.7553	10.4385	0	-0.182678	-0.225075	-0.646019
1161	7.58112	6.94471	15.7553	10.4385	0	-0.182678	-0.225075	-0.646019
1162	7.58112	6.94471	15.7553	10.3047	0	-0.182678	-0.225075	-0.646019
1163	6.75907	5.97568	14.6299	9.10022	0	-0.182678	-0.225075	-0.646019
1164	5.48033	4.84514	13.0544	8.16343	0	-0.182678	-0.225075	-0.646019
1165	4.56694	3.71461	12.6042	7.62812	0	-0.182678	-0.225075	-0.646019
1166	4.11025	3.06859	8.10271	3.74715	0	-0.182678	0	-0.646019
1167	3.74489	2.90709	6.75226	3.47949	0	-0.182678	0	-0.32301
1168	3.01418	2.42257	4.95166	2.40888	0	0	0	0
1169	2.8315	2.26107	4.50151	2.14123	0	0	0	0
1170	0.639372	0.484514	1.35045	0.936787	0	0	0	0
1171	0.274016	0.32301	0.675226	0.669134	0	0	0	0
1172	0.274016	0.32301	0.675226	0.669134	0	0	0	0
1173	0.274016	0.32301	0.675226	0.669134	0	0	0	0
1174	0.274016	0.32301	0.675226	0.669134	0	0	0	0
1175	0.274016	0.32301	0.675226	0.40148	0	0	0	0
1176	0.274016	0.32301	0.450151	0.40148	0	0	0	0
1177	1.6441	0.807524	2.70091	2.0074	0	0	0	0
1178	1.82678	0.969029	2.92598	2.27505	0	0	0	0
1179	1.73544	0.807524	2.70091	2.14123	0	0	0	0
1180	1.73544	0.807524	2.92598	2.14123	0	0	0	0
1181	1.6441	0.646019	2.70091	2.0074	0	0	0	0
1182	1.6441	0.807524	2.70091	2.14123	0	0	0	0
1183	1.6441	0.807524	2.70091	2.14123	0	0	0	0
1184	1.73544	0.807524	2.70091	2.0074	0	0	0	0
1185	1.73544	0.807524	2.70091	2.0074	0	0	0	0
1186	1.73544	0.807524	2.70091	2.0074	0	0	-0.225075	0
1187	1.73544	0.807524	2.70091	2.0074	0	0	-0.225075	0
1188	1.73544	0.807524	2.70091	2.0074	0	0	-0.225075	0
1189	1.73544	0.807524	2.70091	2.0074	0	0	-0.225075	0
1190	1.73544	0.807524	2.70091	2.0074	0	0	-0.225075	0
1191	1.73544	0.807524	2.70091	2.0074	0	0	-0.225075	0
1192	1.73544	0.807524	2.70091	2.0074	0	0	-0.450151	0
1193	1.73544	0.807524	2.70091	2.0074	0.267653	-0.091339	-0.675226	-0.484514
1194	1.73544	0.807524	2.70091	2.0074	2.0074	-0.456694	-2.70091	-1.45354
1195	1.73544	0.807524	2.70091	2.0074	2.0074	-0.456694	-2.70091	-1.45354
1196	1.73544	0.807524	2.70091	2.0074	2.0074	-0.548033	-3.37613	-1.45354
1197	1.73544	0.807524	2.70091	2.0074	2.54271	-0.639372	-4.27643	-1.77655
1198	0.365355	0.32301	0.450151	0.40148	3.21184	-0.639372	-4.27643	-1.77655
1199	0.182678	0.161505	0.225075	0.133827	4.41628	-0.73071	-5.17673	-1.77655
1200	0.091339	0.161505	0.225075	0.133827	4.55011	-0.913388	-5.85196	-1.93806
1201	0.091339	0.161505	0	0.133827	4.55011	-1.00473	-5.85196	-1.93806
1202	0.091339	0.161505	0	0.133827	4.55011	-1.00473	-5.85196	-1.93806
1203	0.091339	0	0	0	4.55011	-1.00473	-5.85196	-1.93806
1204	0.091339	0	0	0	4.55011	-1.00473	-5.85196	-1.93806
1205	0	0	0	0	4.55011	-1.00473	-5.85196	-1.93806
1206	0	0	0	0	4.55011	-1.00473	-5.85196	-1.93806
1207	0	0	0	0	4.55011	-1.00473	-5.62689	-1.93806
1208	0	0	0	0	4.55011	-1.00473	-5.62689	-1.93806
1209	0	0	0	0	4.55011	-1.00473	-5.62689	-1.93806
1210	0	0	0	0	4.55011	-1.00473	-5.62689	-1.93806
1211	0.091339	0	0	0.267653	4.55011	-1.00473	-5.62689	-1.93806
1212	0.274016	0	0	0.267653	4.55011	-1.00473	-5.62689	-1.93806
1213	0.274016	0	0	0.267653	4.55011	-1.09607	-5.40181	-1.93806
1214	0.274016	0	0	0.267653	4.28245	-1.00473	-5.17673	-1.45354
1215	0.274016	0	0	0.267653	2.54271	-0.639372	-3.15106	-0.484514
1216	0.274016	0	0	0.267653	2.54271	-0.73071	-3.15106	-0.484514
1217	0.274016	0	0	0.267653	2.67653	-0.639372	-2.47583	-0.484514
1218	0.274016	0	0	0.267653	2.14123	-0.548033	-1.57553	-0.161505
1219	0.456694	0	1.12538	0.267653	1.47209	-0.548033	-1.57553	-0.161505
1220	0.548033	0	1.12538	0.267653	0.267653	-0.456694	-0.675226	-0.161505
1221	0.548033	0	1.12538	0.267653	0.133827	-0.274016	0	0
1222	0.548033	0	1.12538	0.936787	0.133827	-0.182678	0	0
1223	0.73071	0	1.12538	1.07061	0.133827	-0.182678	0	0
1224	0.73071	0	1.12538	1.07061	0.133827	-0.182678	0	0
1225	0.73071	0	1.12538	1.07061	0.133827	-0.182678	0	0
1226	0.73071	0	1.12538	1.07061	0.133827	-0.182678	0	-0.161505
1227	0.73071	0	1.12538	1.20444	0.133827	-0.182678	0	-0.161505
1228	0.822049	0	1.12538	1.20444	0.40148	-0.182678	0	-0.161505
1229	0.822049	0	1.12538	1.20444	0.40148	-0.182678	-0.225075	-0.161505
1230	0.822049	0	1.12538	1.20444	0.40148	-0.182678	-0.225075	-0.161505
1231	0.822049	0	1.12538	1.20444	0.40148	-0.182678	-0.225075	-0.161505
1232	0.73071	0	1.12538	0.936787	0.40148	-0.182678	-0.225075	-0.161505
1233	0.548033	0	1.12538	0.936787	0.40148	-0.182678	-0.225075	-0.161505
1234	0.548033	0	1.12538	0.936787	0.40148	-0.091339	-0.225075	-0.161505
1235	0.548033	0	1.12538	0.936787	0.40148	-0.091339	-0.225075	-0.161505
1236	0.548033	0	1.12538	0.936787	0.40148	-0.091339	-0.225075	-0.161505
1237	0.548033	0	1.12538	0.936787	0.40148	0	-0.225075	-0.161505
1238	0.548033	0	1.12538	0.936787	0.267653	0	-0.225075	-0.161505
1239	0.548033	0	1.12538	0.936787	0.267653	0	-0.225075	-0.161505
1240	0.365355	0	0	0.936787	0.267653	0	-0.225075	-0.161505
1241	0.274016	0	0	0.936787	0.267653	0	-0.225075	-0.161505
1242	0.456694	0.32301	0	1.20444	0.267653	0	-0.225075	-0.161505
1243	0.456694	0.32301	0	0.669134	0.267653	0	-0.225075	-0.161505
1244	0.274016	0.32301	0	0.535307	0.267653	0	-0.225075	-0.161505
1245	0.274016	0.32301	0	0.535307	0.267653	0	-0.225075	-0.161505
1246	0.456694	0.484514	0	0.535307	0.267653	0	-0.225075	-0.161505
1247	0.548033	0.484514	0	0.535307	0.267653	0	-0.225075	0
1248	0.548033	0.484514	0	0.40148	0.267653	0	-0.225075	0
1249	0.456694	0.484514	0	0.40148	0	0	-0.225075	0
1250	0.456694	0.484514	0	0.535307	0	0	0	0
1251	0.456694	0.484514	0.225075	0.535307	0	0	0	0
1252	0.456694	0.484514	0.450151	0.669134	0	0	0	0
1253	0.456694	0.484514	0.450151	0.669134	0	0	0	0
1254	0.456694	0.484514	0.450151	0.669134	0	0	0	0
1255	0.456694	0.484514	0.450151	0.669134	0	0	0	0
1256	0.456694	0.484514	0.450151	0.669134	0	0	0	0
1257	0.456694	0.484514	0.450151	0.669134	0	0	0	0
1258	0.456694	0.484514	0.450151	0.669134	0	0	0	0
1259	0.456694	0.484514	0.450151	0.669134	0	0	0	0
1260	0.456694	0.484514	0.450151	0.669134	0	0	0	0
1261	0.456694	0.484514	0.450151	0.669134	0	0	0	0
1262	0.456694	0.484514	0.450151	0.669134	0	0	0	0
1263	0.274016	0.161505	0.450151	0.40148	0	0	0	0
1264	0.274016	0.161505	0.450151	0.267653	0	0	0	0
1265	0.274016	0.161505	0.450151	0.267653	0	0	0	0
1266	0.274016	0.161505	0.450151	0.267653	0	0	0	0
1267	0.091339	0	0.450151	0.267653	0	0	0	0
1268	0	0	0.450151	0.267653	0	0	0	0
1269	0	0	0.450151	0.267653	0	0	0	0
1270	0	0	0.450151	0.267653	0	0	0	0
1271	0	0	0.450151	0.133827	0	0	0	0
1272	0	0	0.225075	0.133827	0	0	0	0
1273	0	0	0	0	0	0	0	0
1274	0	0	0	0	0	0	0	0
1275	0	0	0	0	0	0	0	0
1276	0	0	0	0	0	0	0	0
1277	0	0	0	0	0	0	0	0
1278	0	0	0	0	0	0	0	0
1279	0	0	0	0	0	0	0	0
1280	0	0	0	0	0	0	0	0
1281	0	0	0	0	0	0	0	0
1282	0	0	0	0	0	0	0	0
1283	0	0	0	0	0	0	0	0
1284	0	0	0	0.133827	0	0	0	0
1285	0.091339	0	0	0.133827	0	0	0	0
1286	0.091339	0	0	0.133827	0	0	0	0
1287	0.091339	0	0	0.133827	0	0	0	0
1288	0.091339	0	0	0.133827	0	0	0	0
1289	0.091339	0	0	0.133827	0	0	0	0
1290	0.091339	0	0	0.133827	0	0	0	0
1291	0.091339	0	0	0.133827	0	0	0	0
1292	0.091339	0	0	0.133827	0	0	0	0
1293	0.091339	0	0	0.133827	0	0	0	0
1294	0.091339	0	0	0.133827	0	-0.091339	0	0
1295	0.091339	0	0	0.133827	0	-0.091339	0	0
1296	0.091339	0	0	0.133827	0	-0.091339	0	0
1297	0.091339	0	0	0.133827	0	-0.091339	0	0
1298	0.091339	0	0	0.133827	0	-0.091339	0	0
1299	0.091339	0	0	0.133827	0	-0.091339	0	0
1300	0.091339	0	0	0.133827	0	-0.091339	0	0
1301	0.091339	0	0	0.133827	0	-0.091339	0	0
1302	0.091339	0	0	0.133827	0	-0.091339	0	0
1303	0.091339	0	0	0.133827	0	-0.091339	0	0
1304	0.091339	0	0	0.133827	0	-0.091339	0	0
1305	0.091339	0	0	0	0	-0.091339	0	0
1306	0	0	0	0	0	-0.091339	0	0
1307	0	0	0	0	0	-0.091339	0	0
1308	0	0	0	0	0	-0.091339	0	0
1309	0	0	0	0	0	-0.091339	0	0
1310	0	0	0	0	0	-0.091339	0	0
1311	0	0	0	0	0	-0.091339	0	0
1312	0	0	0	0	0	-0.091339	0	0
1313	0	0	0	0	0	-0.091339	0	0
1314	0	0	0	0	0	-0.091339	0	0
1315	0	0	0	0	0	0	0	0
1316	0	0	0	0	0	0	0	0
1317	0	0	0	0	0	0	0	0
1318	0	0	0	0	0	0	0	0
1319	0	0	0	0	0	0	0	0
1320	0	0	0	0	0	0	0	0
1321	0	0	0	0	0	0	0	0
1322	0	0	0	0	0	0	0	0
1323	0	0	0	0	0	0	0	0
1324	0	0	0	0	0	0	0	0
1325	0	0	0	0	0	0	0	0
1326	0	0	0	0	0	0	0	0
1327	0	0	0	0	0	0	0	0
1328	0	0	0	0	0	0	0	0
1329	0	0	0	0	0	0	0	0
1330	0	0	0	0	0	0	0	0
1331	0	0	0	0	0	0	0	0
1332	0	0	0	0	0	0	0	0
1333	0	0	0	0	0	0	0	0
1334	0	0	0	0	0	0	0	0
1335	0	0	0	0	0	0	0	0
1336	0	0	0	0	0	0	0	0
1337	0	0	0	0	0	0	0	0
1338	0	0	0	0	0	0	0	0
1339	0	0	0	0	0	0	0	0
1340	0	0	0	0	0	0	0	0
1341	0	0	0	0	0	0	0	0
1342	0	0	0	0	0	0	0	0
1343	0	0	0	0	0	0	0	0
1344	0	0	0	0	0	0	0	0
1345	0	0	0	0	0	0	0	0
1346	0	0	0	0	0	0	0	0
1347	0	0	0	0	0	0	0	0
1348	0	0	0	0	0	0	0	0
1349	0	0	0	0	0	0	0	0
1350	0	0	0	0	0	0	0	0
1351	0	0	0	0	0	0	0	0
1352	0	0	0	0	0	0	0	0
1353	0	0	0	0	0	0	0	0
1354	0	0	0	0	0	0	0	0
1355	0	0	0	0	0	0	0	0
1356	0	0	0	0	0	0	0	0
1357	0	0	0	0	0	0	0	0
1358	0	0	0	0	0	0	0	0
1359	0	0	0	0	0	0	0	0
1360	0	0	0	0	0	0	0	0
1361	0	0	0	0	0	0	0	0
1362	0	0	0	0	0	0	0	0
1363	0	0	0	0	0	0	0	0
1364	0	0	0	0	0	0	0	0
1365	0	0	0	0	0	0	0	0
1366	0	0	0	0	0	0	0	0
1367	0	0	0	0	0	0	0	0
1368	0	0	0	0	0	0	-0.450151	0
1369	0	0	0	0	0	0	-0.450151	0
1370	0	0	0	0	0	0	-0.450151	0
1371	0	0	0	0	0	0	-0.450151	0
1372	0	0	0	0	0	0	-0.450151	0
1373	0	0	0	0	0	0	-0.450151	0
1374	0	0	0	0	0	0	-0.450151	0
1375	0	0	0	0	0	0	-0.450151	0
1376	0	0	0	0	0	0	-0.450151	0
1377	0	0	0	0	0	0	-0.450151	0
1378	0	0	0	0	0.267653	0	-0.675226	0
1379	0	0	0	0	0.669134	-0.091339	-0.675226	0
1380	0	0	0	0	0.669134	-0.091339	-0.675226	0
1381	0	0	0	0	0.669134	-0.091339	-0.675226	0
1382	0	0	0	0	0.669134	-0.091339	-0.675226	0
1383	0	0	0	0	0.80296	-0.091339	-0.675226	0
1384	0	0	0	0	0.80296	-0.091339	-0.675226	0
1385	0	0	0	0	0.80296	-0.091339	-0.675226	0
1386	0	0	0	0	0.80296	-0.091339	-0.675226	0
1387	0	0	0	0	0.80296	-0.091339	-0.675226	0
1388	0	0	0	0	0.80296	-0.091339	-0.675226	0
1389	0.73071	0.161505	0.675226	0.80296	0.80296	-0.091339	-0.225075	0
1390	24.4788	35.3695	68.1979	71.5973	0.80296	-0.091339	-0.225075	0
1391	25.0268	35.8541	68.8731	72.1326	0.80296	-0.091339	-0.225075	0
1392	25.3922	36.5001	69.7734	72.8017	0.80296	-0.091339	-0.225075	0
1393	25.4835	36.5001	69.7734	72.8017	0.80296	-0.091339	-0.225075	0
1394	25.4835	36.5001	69.7734	72.8017	0.80296	-0.091339	-0.225075	0
1395	25.4835	36.5001	69.7734	72.8017	0.80296	-0.091339	-0.225075	0
1396	25.4835	36.5001	69.7734	72.8017	0.80296	-0.091339	-0.225075	0
1397	25.4835	36.5001	69.7734	72.8017	0.80296	-0.091339	-0.225075	0
1398	25.4835	36.5001	69.7734	72.8017	0.80296	-0.091339	-0.225075	0
1399	25.4835	36.5001	69.7734	72.8017	0.535307	-0.091339	0	0
1400	26.5796	36.8231	71.574	73.337	0.133827	0	0	0
1401	27.4016	37.6306	75.1752	74.5415	0.133827	0	0	0
1402	27.493	37.7921	75.6253	75.3444	0.133827	0	0	0
1403	28.2237	37.7921	76.0755	75.7459	0.133827	0	0	0
1404	28.2237	37.7921	76.0755	75.7459	0	0	0	0
1405	28.2237	37.7921	76.0755	75.7459	0	0	0	0
1406	28.2237	37.7921	76.0755	75.7459	0	0	0	0
1407	28.2237	37.7921	76.0755	75.7459	0	0	0	0
1408	28.2237	37.7921	76.0755	75.7459	0.133827	0	0	0
1409	28.2237	37.7921	76.0755	75.7459	0.133827	0	0	0
1410	27.493	37.6306	75.6253	75.2106	0.133827	0	0	0
1411	3.74489	2.42257	8.10271	4.41628	0.133827	0	0	0
1412	4.84096	3.2301	10.8036	5.21924	0.133827	0	0	0
1413	4.4756	2.58408	9.90332	4.55011	0.267653	0	0	0
1414	4.38426	2.58408	11.0287	4.55011	0.267653	0	0	0
1415	4.38426	2.58408	11.0287	4.55011	0.267653	0	-0.225075	0
1416	4.4756	2.58408	11.0287	4.55011	0.267653	0	-0.225075	0
1417	4.4756	2.58408	11.0287	4.55011	0.267653	0	-0.675226	0
1418	4.4756	2.58408	11.0287	4.55011	0.40148	0	-0.900302	0
1419	4.4756	2.58408	11.0287	4.55011	0.669134	0	-0.900302	0
1420	4.4756	2.58408	11.0287	4.55011	0.669134	-0.091339	-0.900302	0
1421	3.37954	2.26107	9.22809	4.0148	1.07061	-0.274016	-1.8006	0
1422	2.55749	1.45354	5.62689	2.81036	1.07061	-0.274016	-1.8006	0
1423	2.46615	1.29204	5.17673	2.0074	1.07061	-0.274016	-1.8006	0
1424	1.73544	1.29204	4.72658	1.60592	1.07061	-0.274016	-1.8006	0
1425	1.73544	1.29204	4.72658	1.60592	1.07061	-0.274016	-1.8006	0
1426	1.73544	1.29204	4.72658	1.60592	1.07061	-0.274016	-1.8006	0
1427	1.73544	1.29204	4.72658	1.60592	1.07061	-0.274016	-1.8006	0
1428	1.73544	1.29204	4.72658	1.60592	1.07061	-0.274016	-1.8006	0
1429	1.73544	1.29204	4.72658	1.60592	0.936787	-0.274016	-1.8006	0
1430	1.73544	1.29204	4.72658	1.60592	0.936787	-0.274016	-1.8006	0
1431	1.73544	1.61505	4.50151	1.33827	0.936787	-0.274016	-1.8006	0
1432	2.28347	2.42257	4.72658	2.0074	0.936787	-0.274016	-1.8006	0
1433	1.1874	2.74558	4.50151	2.54271	0.936787	-0.274016	-1.8006	0
1434	1.82678	4.03762	4.95166	3.88097	0.80296	-0.274016	-1.8006	0
1435	2.74016	4.36063	6.07704	4.81776	0.80296	-0.274016	-1.8006	0
1436	7.85514	10.9823	19.3565	16.0592	0.80296	-0.274016	-1.57553	0
1437	9.04254	14.5354	22.9577	17.9328	0.80296	-0.274016	-1.57553	0
1438	10.0473	16.4735	25.2084	19.5387	0.80296	-0.274016	-1.12538	0
1439	10.1386	16.4735	25.2084	19.5387	0.669134	-0.274016	-0.900302	0
1440	10.2299	16.958	25.2084	19.6725	0.40148	-0.274016	-0.900302	0
1441	10.3213	17.281	25.2084	19.6725	0.40148	-0.182678	-0.900302	0
1442	10.6866	17.604	27.0091	20.2078	0	0	0	0
1443	12.6961	19.7036	34.2115	22.3491	0	0	0	0
1444	17.3544	24.8717	47.0408	33.7243	0	0	0	0
1445	17.3544	25.0332	47.0408	33.7243	0	0	0	0
1446	17.7197	25.6793	47.9411	34.1258	0.267653	-0.456694	-4.05136	-0.32301
1447	17.7197	25.6793	47.9411	34.1258	0.535307	-0.456694	-4.50151	-0.32301
1448	17.7197	25.6793	47.9411	34.5273	0.669134	-0.456694	-4.50151	-0.32301
1449	17.7197	25.6793	47.9411	34.5273	0.669134	-0.456694	-4.95166	-0.32301
1450	17.7197	25.6793	47.9411	34.5273	0.669134	-0.456694	-4.95166	-0.32301
1451	17.7197	25.6793	47.9411	34.5273	0.669134	-0.456694	-4.95166	-0.32301
1452	17.7197	25.3563	47.9411	34.5273	1.33827	-0.822049	-5.85196	-0.484514
1453	17.1717	24.5487	47.716	33.8582	1.33827	-0.822049	-6.07704	-0.484514
1454	16.6237	22.9337	44.5649	31.9846	2.0074	-1.27874	-6.97734	-0.484514
1455	15.9843	21.6416	44.1148	30.6463	2.0074	-1.27874	-6.97734	-0.484514
1456	15.0709	21.3186	41.864	29.7095	2.0074	-1.27874	-6.97734	-0.484514
1457	9.95593	14.6969	28.5846	18.4681	2.0074	-1.27874	-6.97734	-0.484514
1458	8.67719	11.1438	24.9834	16.5945	2.0074	-1.27874	-6.97734	-0.484514
1459	7.67246	9.20577	22.7326	14.9886	2.0074	-1.27874	-6.97734	-0.484514
1460	7.58112	9.20577	22.7326	14.9886	2.0074	-1.27874	-6.97734	-0.484514
1461	7.48978	8.72126	22.7326	14.8548	2.0074	-1.27874	-6.97734	-0.484514
1462	7.39844	8.39825	22.7326	14.8548	2.0074	-1.27874	-6.97734	-0.484514
1463	7.03309	8.07524	20.932	14.3195	2.0074	-1.27874	-6.97734	-0.484514
1464	5.02363	5.97568	13.7296	12.1782	2.0074	-1.27874	-6.97734	-0.484514
1465	0.365355	0.807524	0.900302	0.80296	2.0074	-1.27874	-6.97734	-0.484514
1466	0.365355	0.646019	0.900302	0.80296	2.0074	-1.27874	-6.97734	-0.484514
1467	0	0	0	0.40148	1.73975	-0.822049	-2.92598	-0.161505
1468	0	0	0	0.40148	1.47209	-0.822049	-2.47583	-0.161505
1469	0	0	0	0	1.33827	-0.822049	-2.47583	-0.161505
1470	0	0	0	0.133827	1.33827	-0.822049	-2.02568	-0.161505
1471	0	0	0.225075	0.133827	1.33827	-0.822049	-2.02568	-0.161505
1472	0.182678	0	0.225075	0.133827	1.33827	-0.822049	-2.02568	-0.161505
1473	0.182678	0	0.225075	0.133827	0.669134	-0.456694	-1.12538	0
1474	0.182678	0	0.225075	0.133827	0.669134	-0.456694	-0.900302	0
1475	0.182678	0	0.225075	0.133827	0.267653	-0.091339	0	0
1476	0.182678	0	0.225075	0.133827	0.40148	-0.091339	-0.450151	0
1477	0.182678	0	0.225075	0.133827	0.40148	-0.182678	-0.450151	0
1478	0.182678	0	0.225075	0.133827	0.535307	-0.274016	-0.675226	0
1479	0.182678	0	0.225075	0.133827	0.535307	-0.274016	-0.675226	0
1480	0.182678	0	0.225075	0.133827	0.535307	-0.274016	-0.675226	0
1481	0.182678	0	0.225075	0.133827	0.535307	-0.274016	-0.675226	0
1482	0.182678	0	0.225075	0.133827	0.535307	-0.274016	-0.675226	0
1483	0.182678	0	0.225075	0.133827	0.535307	-0.274016	-0.675226	0
1484	0.182678	0	0.225075	0.133827	0.535307	-0.274016	-0.675226	0
1485	0.182678	0	0.225075	0.133827	0.535307	-0.274016	-0.675226	0
1486	0.182678	0	0.225075	0.133827	0.535307	-0.274016	-0.675226	0
1487	0.182678	0	0.225075	0.133827	0.535307	-0.274016	-0.675226	0
1488	0.182678	0	0.225075	0.133827	0.535307	-0.274016	-0.675226	0
1489	0.182678	0	0.225075	0.133827	0.535307	-0.274016	-0.675226	0
1490	0.182678	0	0.225075	0.133827	0.535307	-0.274016	-0.675226	0
1491	0.182678	0	0.225075	0	0.535307	-0.274016	-0.675226	0
1492	0.182678	0	0	0	0.535307	-0.274016	-0.675226	0
1493	0	0	0	0	0.535307	-0.274016	-0.675226	0
1494	0	0	0	0	0.535307	-0.274016	-0.675226	0
1495	0	0	0	0	0.535307	-0.274016	-0.675226	0
1496	0	0	0	0	0.267653	-0.182678	-0.675226	0
1497	0	0	0	0	0.133827	-0.182678	-0.225075	0
1498	0	0	0	0	0.133827	-0.091339	-0.225075	0
1499	0	0	0	0	0	0	0	0
1500	0	0	0	0	0	0	0	0
1501	0	0	0	0	0	0	0	0
1502	0	0	0	0	0	0	0	0
1503	0	0	0	0	0	0	0	0
1504	0	0	0	0	0	0	0	0
1505	0	0	0	0	0	0	0	0
1506	0	0	0	0	0	0	0	0
1507	0	0	0	0	0	0	0	0
1508	0	0	0	0	0	0	0	0
1509	0	0	0	0	0	0	0	0
1510	0	0	0	0	0	0	0	0
1511	0	0	0	0	0	0	0	0
1512	0	0	0	0	0	0	0	0
1513	0	0	0	0	0	0	0	0
1514	0	0	0	0	0	0	0	0
1515	0	0	0	0	0	0	0	0
1516	0	0	0	0	0	0	0	0
1517	0	0	0	0	0	0	0	0
1518	0	0	0	0	0	0	0	0
1519	0	0	0	0	0	0	0	0
1520	0	0	0	0	0	0	0	0
1521	0	0	0	0	0	0	0	0

## Sheet: Fig.1e
SRA feeding	feeding	non-feeding	SRA non-feeding
SRR31654759	53.4394	1.52611	SRR31654754
SRR31654762	24.7828	1.43853	SRR31654760 (Note: non-feeding post-aestivation)
SRR31654752	40.5669	16.2812	SRR31654756
SRR31654758 (note: exceptionally feeding aestivation)	72.2376	13.1995	SRR31654755
Table Analyzed	feeding vs non feeding sRNA
Title
Column B	non-feeding
vs.	vs.
Column A	feeding
Title
Unpaired t test
P value	0.01
P value summary	*
Significantly different (P < 0.05)?	Yes
One- or two-tailed P value?	Two-tailed
t, df	t=3.68, df=6
Title
How large is the effect?
Mean of column A	47.8
Mean of column B	8.11
Difference between means (B - A) ± SEM	-39.6 ± 10.8
95% confidence interval	-66.0 to -13.3
R squared (eta squared)	0.693
Title
F test to compare variances
F, DFn, Dfd	6.71, 3, 3
P value	0.152
P value summary	ns
Significantly different (P < 0.05)?	No
Title
Data analyzed
Sample size, column A	4
Sample size, column B	4

## Sheet: Fig.1g
gut	carcass
12.4055	6.10054
12.5079	4.89454
Title	Data Set-A
Table Analyzed	Data 19
Title
Column B	carcass
vs.	vs.
Column A	gut
Title
Unpaired t test
P value	0.007
P value summary	**
Significantly different (P < 0.05)?	Yes
One- or two-tailed P value?	Two-tailed
t, df	t=11.5, df=2
Title
How large is the effect?
Mean of column A	12.5
Mean of column B	5.5
Difference between means (B - A) ± SEM	-6.96 ± 0.605
95% confidence interval	-9.56 to -4.36
R squared (eta squared)	0.985
Title
F test to compare variances
F, DFn, Dfd	139, 1, 1
P value	0.108
P value summary	ns
Significantly different (P < 0.05)?	No
Title
Data analyzed
Sample size, column A	2
Sample size, column B	2

## Sheet: Fig.1h
rep	250 ng dsRNA	dsNode343
1 (dsPc-1)	7123.86	543.332
2 (dsPc-1)	4350.29	201.073
3 (dsPc-2)	4142.34	439.755

## Sheet: Fig.2a
Title	dsmGFP										dsDcr-2
2 DPT	84.1284	101.648	118.474	81.353	52.732	156.808	116.219	61.0581	179.879	47.7016	248.049	164.267	148.482	145.013	155.074	197.398	249.263	175.542	225.152	140.85
4 DPT	70.7719	146.227	147.962	49.0893	158.023	148.135	94.3625	51.3443	20.2949	169.297	183.695	103.729	123.157	182.827	172.073	128.014	89.1587	224.284	94.0156	129.402
6 DPT	63.5421	41.1934	65.3912	106.958	35.4033	21.7624	117.516	69.5958	33.1049	100.252	113.814	187.462	75.2732	47.5247	52.1249	100.435	131.405	110.637	82.8083	108.349
Compare cell means regardless of rows and columns
Title
Number of families	1
Number of comparisons per family	3
Alpha	0.05
Title
Šídák's multiple comparisons test	Predicted (LS) Mean diff.	95.00% CI of diff.	Below threshold?	Summary	Adjusted P Value
Title
2 DPT:dsmGFP vs. 2 DPT:dsDcr-2	-52.6	-81.0 to -24.3	Yes	***	<.001
4 DPT:dsmGFP vs. 4 DPT:dsDcr-2	-52.6	-81.0 to -24.3	Yes	***	<.001
6 DPT:dsmGFP vs. 6 DPT:dsDcr-2	-52.6	-81.0 to -24.3	Yes	***	<.001
Title
Title
Test details	Predicted (LS) Mean 1	Predicted (LS) Mean 2	Predicted (LS) Mean diff.	SE of diff.	N1	N2	t	DF
Title
2 DPT:dsmGFP vs. 2 DPT:dsDcr-2	116	169	-52.6	11.5	10	10	4.57	56
4 DPT:dsmGFP vs. 4 DPT:dsDcr-2	98	151	-52.6	11.5	10	10	4.57	56
6 DPT:dsmGFP vs. 6 DPT:dsDcr-2	56.9	110	-52.6	11.5	10	10	4.57	56

## Sheet: Fig.2b
Title	dsNode343 1A										dsNode343 2A										dsmGFP
2 DPT	64.4963	75.6644	73.2804	61.48	44.0314	54.9005	52.5335	34.4527	64.5048	30.2401	59.0447	49.4147	90.1307	93.2838	65.4704	77.0486	64.3852	60.6426	68.2133	52.4566	86.747	53.0975	99.6582	94.1981	75.314	142.938	134.718	59.207	139.084	115.039
4 DPT	40.8579	37.5417	28.3961	50.91	22.6292	27.8792	23.9443	29.965	18.4372	70.1786	39.507	52.9505	34.1323	41.568	31.3996	74.9568	53.8913	37.24	84.9782	73.6845	130.807	58.2731	20.7673	108.165	51.6739	82.8275	72.3438	64.6971	48.0116	97.3554
6 DPT	20.2375	0.117064	16.4736	19.4506	12.466	9.46424	12.7574	19.4053	13.0505	7.00931	45.0876	7.59122	36.7222	12.7267	9.99316	8.36538	24.4946	9.17115	4.21772	21.0749	67.7809	78.0458	27.5724	31.5389	19.1062	19.448	17.8783	13.0009	23.247	28.9524
Compare cell means regardless of rows and columns
Title
Number of families	1
Number of comparisons per family	6
Alpha	0.05
Šídák's multiple comparisons test	Predicted (LS) Mean diff.	95.00% CI of diff.	Below threshold?	Summary	Adjusted P Value
Title
2 DPT:dsNode343 1A vs. 2 DPT:dsmGFP	-34.2	-48.6 to -19.7	Yes	***	<.001
2 DPT:dsNode343 2A vs. 2 DPT:dsmGFP	-22.6	-37.1 to -8.12	Yes	***	<.001
4 DPT:dsNode343 1A vs. 4 DPT:dsmGFP	-34.2	-48.6 to -19.7	Yes	***	<.001
4 DPT:dsNode343 2A vs. 4 DPT:dsmGFP	-22.6	-37.1 to -8.12	Yes	***	<.001
6 DPT:dsNode343 1A vs. 6 DPT:dsmGFP	-34.2	-48.6 to -19.7	Yes	***	<.001
6 DPT:dsNode343 2A vs. 6 DPT:dsmGFP	-22.6	-37.1 to -8.12	Yes	***	<.001
Test details	Predicted (LS) Mean 1	Predicted (LS) Mean 2	Predicted (LS) Mean diff.	SE of diff.	N1	N2	t	DF
Title
2 DPT:dsNode343 1A vs. 2 DPT:dsmGFP	59.3	93.4	-34.2	5.37	10	10	6.36	85
2 DPT:dsNode343 2A vs. 2 DPT:dsmGFP	70.8	93.4	-22.6	5.37	10	10	4.21	85
4 DPT:dsNode343 1A vs. 4 DPT:dsmGFP	38.4	72.6	-34.2	5.37	10	10	6.36	85
4 DPT:dsNode343 2A vs. 4 DPT:dsmGFP	50	72.6	-22.6	5.37	10	10	4.21	85
6 DPT:dsNode343 1A vs. 6 DPT:dsmGFP	5.97	40.1	-34.2	5.37	10	10	6.36	85
6 DPT:dsNode343 2A vs. 6 DPT:dsmGFP	17.5	40.1	-22.6	5.37	10	10	4.21	85

## Sheet: Fig.2c
DPT	mGFP	1A	2A	dsDcr2
2		1
2			1
3		1
3		1
3			1
4		1
4		1
4		1
4			1
4			1
5		1
5		1
5		1
5		1
5		1
5		1
5			1
5			1
5			1
7	1
7			1
7			1
12	0
12	0
12	0
12	0
12	0
12	0
12	0
12	0
12	0
12	0
12	0
12	0
12	0
12	0
12	0
12	0
12	0
12	0
12	0
12	0
12	0
12		0
12		0
12		0
12		0
12		0
12		0
12		0
12		0
12		0
12		0
12			0
12			0
12			0
12			0
12			0
12			0
12			0
12			0
12			0
12			0
12			0
12			0
12			0
12				0
12				0
12				0
12				0
12				0
12				0
12				0
12				0
12				0
12				0
12				0
12				0
12				0
12				0
12				0
12				0
12				0
12				0
12				0
12				0
12				0
12				0
12				0
12				0
12				0
Table Analyzed	1A_2A_1ugx2		Table Analyzed	1A_2A_1ugx2			Table Analyzed	1A_2A_1ugx2
Title			Title				Title
Logrank (Mantel-Cox) test (recommended)			Logrank (Mantel-Cox) test				Logrank (Mantel-Cox) test
Chi square	28.4		Chi square	13.54			Chi square	8.504
df	3		df	1			df	1
P value	<0.0001		P value	0.0002			P value	0.0035
P value summary	****		P value summary	***			P value summary	**
Are the survival curves sig different?	Yes		Are the survival curves sig different?	Yes			Are the survival curves sig different?	Yes
Title			Title				Title
Logrank test for trend (recommended)			Gehan-Breslow-Wilcoxon test				Gehan-Breslow-Wilcoxon test
Chi square	0.6898		Chi square	13.95			Chi square	8.661
df	1		df	1			df	1
P value	0.4062		P value	0.0002			P value	0.0033
P value summary	ns		P value summary	***			P value summary	**
Sig. trend?	No		Are the survival curves sig different?	Yes			Are the survival curves sig different?	Yes
Title			Title				Title
Gehan-Breslow-Wilcoxon test			Median survival				Median survival
Chi square	28.59		mGFP	Undefined			mGFP	Undefined
df	3		1A	5			2A	Undefined
P value	<0.0001		Title				Title
P value summary	****		Hazard Ratio (Mantel-Haenszel)	A/B	B/A		Hazard Ratio (Mantel-Haenszel)	A/C	C/A
Are the survival curves sig different?	Yes		Ratio (and its reciprocal)	0.1164	8.593		Ratio (and its reciprocal)	0.1507	6.637
			95% CI of ratio	0.03701 to 0.3660	2.732 to 27.02		95% CI of ratio	0.04223 to 0.5377	1.860 to 23.68
			Title				Title
			Hazard Ratio (logrank)	A/B	B/A		Hazard Ratio (logrank)	A/C	C/A
			Ratio (and its reciprocal)	0.06519	15.34		Ratio (and its reciprocal)	0.09117	10.97
			95% CI of ratio	0.02180 to 0.1949	5.130 to 45.88		95% CI of ratio	0.02623 to 0.3168	3.156 to 38.12

## Sheet: Fig.3a
	dsDcr2	dsDcr2.1	dsDcr2.2	dsDcr2.3	dsDcr2.4	dsDcr2.5	dsmGFP_d	dsmGFP_d.1	dsmGFP_d.2	dsmGFP_d.3	dsmGFP_d.4	dsmGFP_d.5
TRINITY_DN1157_c0_g1	1.40168	0.0965906	2.09604	0.252897	0.503086	0.0745813	-0.282009	-0.973374	-1.16111	-1.29162	-0.427736	-0.289027
TRINITY_DN1709_c0_g2	1.42224	2.17912	-0.117759	1.08689	-0.471911	-0.486267	-0.60963	-0.972354	-0.441122	-0.471407	-0.230528	-0.887271
TRINITY_DN14828_c0_g1	1.3004	1.40922	1.04631	0.370705	0.513612	0.67704	-0.274758	-1.40681	-0.930005	-0.955383	-0.82723	-0.923106
TRINITY_DN32486_c0_g1	-0.454609	-0.568031	0.614562	-0.589528	2.02656	2.01568	-0.412711	-0.588753	-0.579848	-0.535593	-0.514741	-0.412982
TRINITY_DN16991_c0_g1	-0.157674	1.30231	0.368014	1.04184	1.04271	1.14463	-1.17726	-1.04251	-0.0231141	-0.0193275	-1.47738	-1.00225
TRINITY_DN6227_c0_g1	1.9302	1.36203	1.13812	0.0947189	-0.238925	-0.176358	-0.440456	-1.40334	-0.207683	-0.323284	-0.543049	-1.19198
TRINITY_DN72_c0_g2	-0.174168	1.32028	1.615	-0.0248756	0.851456	0.527488	0.646598	-1.45257	-0.748446	-0.734293	-0.513852	-1.31262
Showing 1 to 7 of 7 entries, 12 total columns

[truncated: 11 more sheets: Fig.3d, Fig.4a-b, Fig.4c, Fig.4d, Fig.4e, Fig.5a, Fig.5b, Fig.5e, Fig.5f, Fig.S_Dcr2_exp, Tab.S1]
