# Supplementary material for: Natural double-stranded RNA mediates plant defence against insect herbivores
Source: Research Square preprint supplement (doi:10.21203/rs.3.rs-8904826/v1), 2026-02-19
Supplement: Supplementary file 2 [file b7a6ed641ebbd3a0aff5fc55.xlsx]

## Sheet: dsmGFP-1_vs_dsDcr2
transcript_id	baseMean	log2FoldChange	lfcSE	stat	pvalue	padj
PC12684_c1_g2	13.27	-5.75234	1.09949	-5.23181	1.67861e-07	9.20719e-05
PC72225_c0_g1	4.48086	-5.64131	1.53487	-3.67543	0.000237448	0.0128638
PC23507_c0_g1	38.889	-5.43546	1.34525	-4.04048	5.33409e-05	0.00538337
PC35094_c1_g2	8.85571	-5.11129	1.3205	-3.87073	0.000108512	0.00825415
PC37362_c0_g2	58.5503	-5.01067	0.541426	-9.25458	2.15076e-20	1.35665e-16
PC105757_c0_g1	6.34953	-4.6494	1.17869	-3.94456	7.9945e-05	0.0068145
PC87650_c0_g1	9.4661	-4.10287	1.23238	-3.32922	0.000870909	0.0255789
PC15774_c1_g1	8.10715	-3.99233	0.932441	-4.28159	1.85561e-05	0.00292618
PC121677_c0_g1	21.1785	-3.61955	0.844653	-4.28525	1.82538e-05	0.00291494
PC1123_c0_g3	1209.43	-3.50916	0.912478	-3.84574	0.000120188	0.00876615
PC2940_c0_g4	4.6229	-3.43926	0.808918	-4.25168	2.12172e-05	0.00314901
PC32486_c0_g1	119.833	-3.32937	0.974152	-3.41771	0.000631507	0.0213586
PC105387_c0_g1	19.8605	-2.93273	0.410663	-7.14146	9.23436e-13	3.8832e-09
PC10448_c0_g1	14.7767	-2.80562	0.904894	-3.1005	0.00193196	0.0389375
PC5469_c0_g1	27.802	-2.78674	0.293702	-9.48833	2.3477e-21	2.96174e-17
PC5791_c0_g1	574.627	-2.76588	0.509844	-5.42495	5.7972e-08	4.06303e-05
PC29498_c0_g1	8.96638	-2.68427	0.638734	-4.20248	2.6401e-05	0.00364751
PC7068_c0_g1	22.5408	-2.6643	0.478021	-5.57361	2.49514e-08	2.0985e-05
PC26003_c2_g2	25.0546	-2.61461	0.555363	-4.70793	2.5025e-06	0.000809495
PC134442_c0_g1	17.573	-2.59607	0.683527	-3.79805	0.000145837	0.00953265
PC32070_c1_g1	6.66833	-2.58295	0.875516	-2.9502	0.0031757	0.049871
PC3702_c0_g2	9.18472	-2.55141	0.65614	-3.88852	0.000100859	0.00790301
PC7453_c0_g1	92.8567	-2.54311	0.702908	-3.61799	0.000296903	0.0146312
PC33523_c0_g1	8.40195	-2.51407	0.826514	-3.04178	0.00235184	0.0425677
PC32883_c0_g1	13.0139	-2.50881	0.512801	-4.89237	9.96288e-07	0.000380869
PC2391_c0_g1	135.78	-2.47008	0.559925	-4.41145	1.02681e-05	0.00219555
PC42193_c0_g1	9.85621	-2.46483	0.56407	-4.36972	1.24405e-05	0.00237792
PC70578_c0_g1	17.2504	-2.45003	0.62429	-3.92451	8.69065e-05	0.00726072
PC97862_c0_g1	25.1539	-2.44793	0.617303	-3.96552	7.32352e-05	0.00637172
PC17167_c0_g1	82.8329	-2.43103	0.378004	-6.43122	1.26581e-10	2.24805e-07
PC5500_c0_g1	466.207	-2.40545	0.64801	-3.71206	0.000205578	0.0117885
PC11366_c0_g1	3343.86	-2.3977	0.662183	-3.62091	0.000293571	0.0145237
PC16688_c0_g1	3423.45	-2.38641	0.693967	-3.4388	0.000584306	0.0203067
PC71733_c0_g1	22.29	-2.38164	0.663467	-3.58969	0.000331072	0.0154758
PC5425_c0_g1	224.256	-2.36101	0.382929	-6.16564	7.01971e-10	8.85571e-07
PC56922_c1_g1	22.2987	-2.3588	0.452302	-5.21509	1.83727e-07	9.65753e-05
PC2157_c1_g1	246.828	-2.35535	0.617655	-3.81337	0.000137086	0.00924816
PC8207_c1_g1	20.0578	-2.34065	0.607178	-3.85496	0.000115749	0.00864039
PC84004_c0_g1	30.08	-2.3406	0.333768	-7.01265	2.3384e-12	7.37502e-09
PC21808_c0_g1	20.3387	-2.32818	0.537749	-4.32949	1.49455e-05	0.00260636
PC44605_c0_g2	13.8712	-2.32536	0.759066	-3.06345	0.00218803	0.041322
PC8189_c0_g1	225.085	-2.3237	0.57581	-4.03554	5.44777e-05	0.00541152
PC13501_c2_g1	14.463	-2.31697	0.588962	-3.93399	8.35489e-05	0.00702674
PC128144_c0_g1	102.679	-2.31021	0.626162	-3.68947	0.00022472	0.0123259
PC1123_c0_g4	507.128	-2.2613	0.696864	-3.24497	0.00117464	0.0304113
PC2623_c6_g1	121.015	-2.24906	0.607623	-3.7014	0.000214416	0.0120221
PC11255_c0_g1	10.7406	-2.23896	0.585794	-3.8221	0.000132321	0.00917192
PC49043_c1_g1	7.61534	-2.23863	0.54341	-4.11959	3.79543e-05	0.00439277
PC43589_c0_g2	72.0547	-2.21539	0.719549	-3.07887	0.0020779	0.0402051
PC61244_c0_g1	4.48339	-2.21192	0.717198	-3.08411	0.00204162	0.0398787
PC337_c0_g1	15127.5	-2.21092	0.606937	-3.64275	0.000269745	0.0138706
PC119234_c0_g1	7.69192	-2.20556	0.609074	-3.62116	0.000293282	0.0145237
PC19694_c1_g2	14.4588	-2.17724	0.570167	-3.81859	0.000134214	0.00921758
PC106491_c0_g1	24.4905	-2.16321	0.727142	-2.97494	0.00293043	0.0485792
PC29916_c0_g3	248.835	-2.15162	0.607487	-3.54184	0.000397345	0.0167649
PC23531_c0_g1	2558.46	-2.1415	0.634951	-3.3727	0.000744348	0.0233853
PC10704_c1_g2	7.12731	-2.14078	0.585084	-3.65893	0.000253275	0.013369
PC18496_c0_g2	13.7097	-2.1318	0.616093	-3.46019	0.000539798	0.0197008
PC26817_c0_g1	268.774	-2.11549	0.483952	-4.37127	1.23525e-05	0.00237792
PC316_c0_g1	189.834	-2.10671	0.637925	-3.30244	0.000958493	0.0271727
PC1597_c0_g5	24.6389	-2.08461	0.546379	-3.81532	0.000136008	0.00922477
PC12291_c1_g1	14.8663	-2.0574	0.603522	-3.40899	0.00065204	0.0218772
PC45923_c0_g1	16.5033	-2.04951	0.689549	-2.97225	0.00295629	0.0489372
PC9486_c0_g4	10.1132	-2.03979	0.611014	-3.33837	0.000842715	0.0250634
PC20020_c0_g2	20.8334	-2.03858	0.542202	-3.75982	0.000170039	0.010464
PC29916_c0_g1	514.296	-2.03801	0.64279	-3.17057	0.0015214	0.0340911
PC9671_c0_g1	62.4603	-2.02864	0.505576	-4.01253	6.00702e-05	0.00561345
PC7250_c0_g1	561.272	-2.02858	0.569413	-3.56258	0.000367225	0.0160424
PC26935_c0_g1	162.547	-2.01281	0.479517	-4.19759	2.6977e-05	0.00364751
PC18052_c0_g1	32.6724	-2.00758	0.551794	-3.63828	0.000274463	0.0139616
PC4539_c0_g1	150.049	-1.99789	0.483763	-4.12989	3.6294e-05	0.00427913
PC46930_c0_g1	4812.05	-1.99767	0.559593	-3.56987	0.000357164	0.0160424
PC14680_c0_g1	2467.67	-1.9744	0.670026	-2.94676	0.00321122	0.0499259
PC11360_c4_g1	23.6114	-1.96076	0.527006	-3.72056	0.00019878	0.0115032
PC18288_c0_g1	21.5908	-1.95156	0.623889	-3.12806	0.00175963	0.0370222
PC5993_c1_g2	51.7175	-1.9484	0.64816	-3.00606	0.0026466	0.0456609
PC19379_c0_g6	158.617	-1.94739	0.637799	-3.05329	0.00226345	0.041928
PC17642_c0_g2	10.7768	-1.9412	0.54404	-3.56812	0.000359556	0.0160424
PC28821_c0_g1	8.7088	-1.91624	0.555657	-3.44861	0.000563482	0.0198815
PC10735_c0_g1	31.0086	-1.91363	0.358955	-5.33112	9.76098e-08	6.15698e-05
PC19296_c0_g1	22.9704	-1.91359	0.606169	-3.15686	0.00159476	0.0348677
PC6821_c0_g2	29.13	-1.88099	0.552396	-3.40515	0.000661272	0.0219378
PC48755_c0_g1	15.5783	-1.86031	0.589421	-3.15616	0.00159861	0.0348915
PC8902_c0_g1	8.94808	-1.85635	0.467622	-3.96977	7.19434e-05	0.00635819
PC35647_c2_g1	21.5743	-1.85624	0.485616	-3.82244	0.00013214	0.00917192
PC5266_c0_g1	110.775	-1.85033	0.442527	-4.18128	2.89876e-05	0.00373157
PC14080_c0_g1	527.471	-1.84515	0.600262	-3.07391	0.00211272	0.0404633
PC9295_c0_g1	184.552	-1.84128	0.568286	-3.24007	0.00119502	0.0305797
PC717_c0_g1	2103.76	-1.82	0.478449	-3.80396	0.000142403	0.00950397
PC32436_c0_g2	34.8657	-1.81965	0.516868	-3.52053	0.00043068	0.0178725
PC10457_c0_g2	25.1938	-1.81021	0.398533	-4.54218	5.56743e-06	0.00144764
PC83343_c0_g1	132.431	-1.80681	0.560971	-3.22085	0.0012781	0.0310074
PC21140_c0_g2	78.7173	-1.78597	0.531992	-3.35713	0.000787566	0.0241965
PC25124_c0_g1	1546.64	-1.77491	0.512923	-3.46038	0.000539417	0.0197008
PC5382_c0_g3	19.2072	-1.7713	0.597638	-2.96383	0.00303834	0.049231
PC30972_c0_g2	15.8685	-1.76506	0.588378	-2.99987	0.00270097	0.0458602
PC12487_c0_g1	12.0992	-1.76419	0.525907	-3.35457	0.000794898	0.0242223
PC10276_c0_g1	375.529	-1.75411	0.563853	-3.11094	0.00186495	0.0381318
PC14765_c0_g1	20.2004	-1.74117	0.499978	-3.48248	0.000496788	0.0191658
PC9803_c0_g1	259.749	-1.73645	0.472467	-3.67528	0.000237586	0.0128638
PC22068_c0_g1	537.543	-1.72515	0.566084	-3.04752	0.00230736	0.0420037
PC18274_c0_g1	274.04	-1.72383	0.441782	-3.90199	9.54062e-05	0.0076177
PC10545_c0_g3	48.6678	-1.71701	0.554748	-3.09511	0.00196739	0.0392447
PC26579_c0_g2	12.7363	-1.71538	0.455915	-3.7625	0.000168226	0.0104032
PC72687_c0_g1	22.5824	-1.71447	0.490131	-3.49799	0.000468784	0.0187373
PC119839_c0_g1	301.204	-1.71294	0.404038	-4.23956	2.23962e-05	0.00328534
PC8098_c0_g1	198.196	-1.71097	0.525761	-3.25427	0.00113686	0.0300043
PC4305_c2_g1	7.43972	-1.70454	0.575139	-2.9637	0.00303967	0.049231
PC4766_c0_g1	2128.83	-1.70009	0.52413	-3.24364	0.00118011	0.0304113
PC22949_c0_g1	26.4553	-1.69464	0.564006	-3.00465	0.00265888	0.0456609
PC6764_c2_g1	9.60403	-1.68311	0.486355	-3.46066	0.00053886	0.0197008
PC240_c0_g1	4346.01	-1.65943	0.543896	-3.05101	0.00228076	0.041928
PC10869_c0_g3	8.53737	-1.65886	0.499859	-3.31866	0.000904511	0.0262923
PC9663_c0_g1	217.205	-1.65676	0.475445	-3.48464	0.000492793	0.0191287
PC13449_c0_g1	13.6858	-1.64705	0.486506	-3.38547	0.000710558	0.0228109
PC5266_c1_g1	4000.1	-1.64244	0.394038	-4.16821	3.06995e-05	0.0038641
PC48669_c0_g1	10.2803	-1.62821	0.529945	-3.07241	0.00212335	0.0404639
PC8424_c0_g1	713.856	-1.60797	0.504298	-3.18852	0.00143001	0.0330281
PC13492_c0_g1	41.9894	-1.5769	0.322822	-4.88474	1.03566e-06	0.000384275
PC17962_c0_g1	22.7917	-1.56226	0.528824	-2.95422	0.0031346	0.0498043
PC876_c0_g1	616.824	-1.56	0.3202	-4.87197	1.10492e-06	0.000398261
PC1445_c3_g1	48.9563	-1.55274	0.330284	-4.70122	2.58617e-06	0.000815645
PC27989_c0_g2	13.9955	-1.54024	0.457508	-3.36658	0.000761069	0.0236484
PC95029_c0_g1	16.0496	-1.53016	0.368108	-4.15683	3.227e-05	0.00391444
PC31543_c0_g1	6.5159	-1.52965	0.476512	-3.2101	0.00132689	0.0317635
PC31781_c1_g1	15.2348	-1.52753	0.374294	-4.08108	4.4826e-05	0.00483335
PC3843_c0_g1	59.5961	-1.51166	0.444385	-3.4017	0.000669689	0.0221164
PC15056_c0_g1	421.271	-1.50814	0.403224	-3.7402	0.000183876	0.0110326
PC16332_c0_g1	11.6663	-1.50665	0.439464	-3.42837	0.000607212	0.020816
PC61177_c0_g1	7.18334	-1.50031	0.463404	-3.23759	0.00120543	0.0305979
PC20447_c0_g1	242.488	-1.49764	0.467991	-3.20014	0.00137362	0.0321501
PC1259_c1_g1	513.342	-1.4937	0.448102	-3.33339	0.000857951	0.0252885
PC8539_c0_g1	26.7037	-1.48505	0.47136	-3.15056	0.00162956	0.0354443
PC19429_c0_g2	47.2902	-1.47841	0.480975	-3.07377	0.00211369	0.0404633
PC9703_c0_g1	364.896	-1.46601	0.352494	-4.15896	3.19695e-05	0.00391444
PC21584_c0_g1	152.407	-1.45682	0.473893	-3.07415	0.00211101	0.0404633
PC5786_c0_g2	1857.89	-1.45395	0.418003	-3.47831	0.000504587	0.0193484
PC22922_c1_g1	18.8938	-1.44458	0.426003	-3.391	0.000696385	0.0226424
PC9713_c0_g1	39.2861	-1.44141	0.427422	-3.37234	0.000745334	0.0233853
PC3630_c1_g2	241.813	-1.43708	0.277769	-5.17365	2.29569e-07	0.000115845
PC1015_c0_g1	1558.43	-1.42001	0.468963	-3.02798	0.00246193	0.0438061
PC26908_c0_g1	17.5248	-1.41455	0.430164	-3.2884	0.00100758	0.0281218
PC6588_c0_g1	382.053	-1.40827	0.438648	-3.21048	0.00132515	0.0317635
PC14181_c0_g1	26.198	-1.40789	0.423717	-3.32271	0.000891466	0.0260935
PC11499_c0_g1	1407.69	-1.39655	0.453089	-3.08228	0.0020542	0.0399303
PC565_c1_g1	37.3539	-1.38936	0.429756	-3.23291	0.00122538	0.030849
PC13621_c0_g1	52.6871	-1.38838	0.365983	-3.79358	0.000148491	0.00960663
PC8048_c1_g1	19.5309	-1.37462	0.455434	-3.01825	0.00254237	0.044663
PC6197_c0_g1	134.304	-1.37134	0.406341	-3.37485	0.000738547	0.0233853
PC26933_c0_g1	55.7483	-1.36793	0.384999	-3.55308	0.000380752	0.0163963
PC12824_c2_g1	7.57206	-1.36451	0.450992	-3.02558	0.00248155	0.0439692
PC2410_c0_g1	255.437	-1.36288	0.402093	-3.38947	0.000700269	0.0227101
PC41686_c2_g2	41.6525	-1.3338	0.449784	-2.96543	0.00302261	0.0491982
PC2574_c2_g1	34.8326	-1.32532	0.304498	-4.35248	1.34608e-05	0.00242592
PC1709_c0_g2	5793.51	-1.31787	0.377517	-3.49088	0.000481433	0.0189206
PC12463_c0_g1	277.249	-1.31641	0.41864	-3.14449	0.00166378	0.0358181
PC8734_c0_g1	16.4844	-1.30645	0.34519	-3.78472	0.000153879	0.00980436
PC27360_c0_g1	34.0982	-1.3055	0.403906	-3.2322	0.00122841	0.030849
PC22501_c2_g1	20.6428	-1.29246	0.415232	-3.11261	0.0018544	0.0381013
PC31489_c0_g1	22.2011	-1.291	0.378991	-3.40641	0.000658222	0.0219378
PC19090_c0_g1	327.912	-1.28884	0.372886	-3.4564	0.000547448	0.0197008
PC22350_c0_g1	64.3574	-1.28444	0.368069	-3.48967	0.00048361	0.0189471
PC12667_c0_g3	49.8178	-1.27663	0.414154	-3.08251	0.00205266	0.0399303
PC20541_c0_g1	42.6638	-1.2652	0.281044	-4.50178	6.73866e-06	0.00163484
PC247_c1_g1	364.123	-1.25991	0.391162	-3.22095	0.00127766	0.0310074
PC22847_c0_g1	665.745	-1.25927	0.35332	-3.56411	0.000365098	0.0160424
PC105089_c0_g1	194.803	-1.25814	0.409095	-3.07542	0.00210203	0.0404633
PC5655_c0_g2	72.9031	-1.25023	0.397174	-3.14782	0.00164493	0.0357171
PC6469_c0_g1	64.1463	-1.24969	0.250493	-4.98895	6.07088e-07	0.000273526
PC1647_c0_g2	19.4701	-1.24449	0.348452	-3.57148	0.000354964	0.0160424
PC94553_c0_g1	91.8115	-1.23757	0.364473	-3.39551	0.000685006	0.0225044
PC15227_c0_g1	95.1763	-1.23052	0.282415	-4.35714	1.31775e-05	0.00242592
PC300_c0_g3	3766.4	-1.22177	0.354374	-3.44769	0.000565395	0.0198815
PC6793_c0_g2	190.504	-1.22064	0.294594	-4.14347	3.42084e-05	0.00411006
PC2441_c3_g1	21.7656	-1.21501	0.34701	-3.50138	0.000462848	0.018702
PC7823_c0_g1	14.8728	-1.21444	0.367467	-3.30488	0.000950163	0.0271727
PC534_c0_g2	772.092	-1.21265	0.268005	-4.52474	6.04684e-06	0.00152568
PC1646_c0_g1	385.297	-1.2119	0.242017	-5.0075	5.51417e-07	0.000257645
PC5357_c0_g1	13.3581	-1.20794	0.391745	-3.08349	0.00204587	0.0398913
PC4853_c0_g1	695.144	-1.20257	0.377902	-3.18222	0.0014615	0.0334621
PC831_c0_g1	265.357	-1.20001	0.205021	-5.85313	4.82419e-09	5.53269e-06
PC2048_c0_g1	684.232	-1.19418	0.310621	-3.8445	0.000120801	0.00876615
PC517_c1_g1	143.45	-1.18966	0.35328	-3.36747	0.000758606	0.0236301
PC39262_c0_g2	20.8108	-1.18608	0.312825	-3.79152	0.000149728	0.00963723
PC31020_c1_g1	32.8627	-1.18608	0.332697	-3.56504	0.000363803	0.0160424
PC19450_c0_g1	2052.94	-1.17374	0.379783	-3.09057	0.00199776	0.0392565
PC5055_c1_g1	177.952	-1.16884	0.312455	-3.74083	0.000183412	0.0110326
PC11021_c0_g1	27.8832	-1.167	0.383999	-3.03908	0.00237304	0.0426858
PC7728_c2_g1	10.5601	-1.16597	0.374789	-3.11101	0.00186449	0.0381318
PC2068_c0_g2	659.412	-1.16574	0.322895	-3.61026	0.000305884	0.0148992
PC7838_c0_g1	159.831	-1.1556	0.356358	-3.2428	0.00118362	0.0304113
PC247_c10_g1	35.8203	-1.15481	0.341343	-3.38315	0.0007166	0.022829
PC35410_c0_g2	11.6839	-1.15304	0.387172	-2.9781	0.00290044	0.0482088
PC3985_c0_g2	36.4747	-1.15029	0.371146	-3.09929	0.00193984	0.0390304
PC2820_c0_g1	59.2295	-1.13658	0.257467	-4.41446	1.01263e-05	0.00219555
PC3381_c0_g1	625.823	-1.12846	0.316557	-3.56478	0.000364166	0.0160424
PC19613_c0_g1	54.9058	-1.12556	0.368801	-3.05195	0.00227362	0.041928
PC12716_c0_g1	383.051	-1.1186	0.357199	-3.13159	0.00173862	0.0368632
PC53338_c1_g1	38.4849	-1.11117	0.357617	-3.10715	0.00188897	0.0383742
PC11788_c0_g1	98.1799	-1.10986	0.272935	-4.06638	4.77495e-05	0.00506205
PC2644_c0_g1	1325.89	-1.1089	0.28328	-3.91449	9.05966e-05	0.00742157
PC17396_c0_g1	34.4633	-1.09768	0.306605	-3.58011	0.000343447	0.0158709
PC8179_c0_g1	2399.73	-1.09728	0.338288	-3.24364	0.00118013	0.0304113
PC348_c0_g1	1874.08	-1.09215	0.301206	-3.62594	0.000287915	0.0144709
PC10838_c0_g1	33.0531	-1.08944	0.27652	-3.93983	8.15398e-05	0.00690379
PC6613_c0_g1	38.904	-1.08824	0.271797	-4.00389	6.23103e-05	0.00573778
PC2582_c1_g1	328.244	-1.08709	0.294528	-3.69096	0.000223412	0.0123077
PC61320_c0_g1	58.1562	-1.0798	0.272069	-3.96885	7.22215e-05	0.00635819
PC819_c5_g1	1084.71	-1.07483	0.363272	-2.95873	0.00308907	0.0494597
PC14192_c0_g2	102.601	-1.07218	0.339255	-3.1604	0.00157552	0.0346875
PC11263_c0_g1	37.2697	-1.06842	0.349507	-3.05694	0.00223605	0.0418206
PC7746_c0_g1	806.916	-1.06374	0.318744	-3.33728	0.000846033	0.0250634
PC19365_c0_g1	21.9107	-1.0575	0.358722	-2.94797	0.00319867	0.0498799
PC3851_c0_g2	31.2175	-1.05688	0.319979	-3.30296	0.000956716	0.0271727
PC34323_c0_g1	61.2892	-1.05479	0.228085	-4.62456	3.75397e-06	0.00112758
PC5490_c0_g1	125.395	-1.04524	0.259952	-4.02089	5.79794e-05	0.0055835
PC3284_c4_g1	32.6933	-1.04139	0.338019	-3.08087	0.00206395	0.0400581
PC2068_c0_g1	870.661	-1.0399	0.352493	-2.95013	0.00317645	0.049871
PC705_c0_g1	8801.43	-1.03817	0.335892	-3.09078	0.0019963	0.0392565
PC7120_c0_g1	86.9853	-1.03749	0.335123	-3.09584	0.00196257	0.0392447
PC16698_c0_g1	1530.83	-1.03293	0.309346	-3.33907	0.000840582	0.0250634
PC5483_c0_g1	1037.56	-1.02664	0.313942	-3.27015	0.00107491	0.0289823
PC976_c0_g2	940.801	-1.02179	0.230558	-4.43183	9.34385e-06	0.00206802
PC1016_c0_g1	324.512	-1.01816	0.211566	-4.8125	1.49057e-06	0.000508224
PC2592_c0_g1	121.248	-1.01755	0.247682	-4.10828	3.98621e-05	0.00449
PC10143_c0_g1	409.272	-1.01567	0.315734	-3.21685	0.00129608	0.0312488
PC30658_c0_g1	18.689	-1.01507	0.340586	-2.98037	0.00287897	0.0480419
PC14589_c0_g1	5907.99	-1.01408	0.271033	-3.74154	0.000182892	0.0110326
PC5438_c0_g1	55.0364	-1.01251	0.327162	-3.09484	0.00196916	0.0392447
PC8888_c0_g1	17.3079	-1.01196	0.327313	-3.09172	0.00199	0.0392565
PC5423_c0_g1	896.603	-1.01126	0.327496	-3.08784	0.00201614	0.0394948
PC5351_c0_g1	29186.9	-1.01102	0.298758	-3.38406	0.000714224	0.0228109
PC9171_c0_g1	116.533	-1.00905	0.259019	-3.89568	9.79227e-05	0.00776946
PC95_c0_g4	28.1862	-1.00385	0.324356	-3.09491	0.0019687	0.0392447
PC4628_c0_g1	62.9366	-1.00374	0.279538	-3.59069	0.000329803	0.0154758
PC9122_c0_g1	26.6767	-1.00109	0.304345	-3.28932	0.00100428	0.0280921
PC5594_c0_g1	532.742	-1.00044	0.220357	-4.5401	5.6228e-06	0.00144764
PC15335_c0_g1	71.411	-0.999634	0.280572	-3.56284	0.000366867	0.0160424
PC6227_c0_g1	1328.67	-0.996707	0.30031	-3.31893	0.000903646	0.0262923
PC2799_c0_g1	1317.33	-0.992616	0.306523	-3.23831	0.00120241	0.0305979
PC2248_c0_g3	43.9838	-0.985937	0.233402	-4.22421	2.39782e-05	0.00347698
PC4386_c0_g1	256.755	-0.980944	0.298644	-3.28466	0.00102104	0.0282476
PC12949_c0_g1	73.1856	-0.978127	0.308903	-3.16646	0.00154307	0.034212
PC29926_c1_g1	179.639	-0.968247	0.267979	-3.61314	0.000302513	0.0148496
PC1235_c0_g1	23212.2	-0.964508	0.279906	-3.44582	0.000569327	0.0198957
PC2539_c0_g1	1133.67	-0.962189	0.233469	-4.12127	3.76788e-05	0.00439277
PC19515_c0_g1	877.274	-0.961349	0.296405	-3.24336	0.0011813	0.0304113
PC919_c6_g1	453.61	-0.959525	0.301973	-3.17752	0.00148539	0.0338432
PC822_c4_g2	14.9729	-0.958838	0.298433	-3.21291	0.00131399	0.0315746
PC1824_c0_g1	1067.27	-0.95046	0.258366	-3.67873	0.0002344	0.0128012
PC2170_c2_g1	18.6257	-0.944223	0.300679	-3.1403	0.00168774	0.0361333
PC7699_c0_g1	460.807	-0.940729	0.281609	-3.34055	0.000836137	0.0250553
PC6908_c0_g1	192.723	-0.934373	0.269471	-3.46743	0.000525459	0.0196369
PC12593_c0_g1	243.025	-0.925495	0.289683	-3.19486	0.00139901	0.0326233
PC12893_c0_g1	1438.17	-0.922757	0.302495	-3.05048	0.00228474	0.041928
PC43682_c0_g1	19.7933	-0.921374	0.307727	-2.99412	0.00275234	0.0465444
PC7479_c0_g2	93.3169	-0.916873	0.265615	-3.45189	0.000556668	0.019838
PC1221_c0_g1	9963.63	-0.912127	0.239903	-3.80207	0.000143495	0.00950397
PC7723_c0_g3	91.5034	-0.910981	0.299556	-3.0411	0.00235716	0.0426028
PC6813_c0_g1	2118.79	-0.910349	0.295952	-3.076	0.00209794	0.0404633
PC5215_c0_g1	939.991	-0.909268	0.301294	-3.01788	0.0025455	0.044663
PC1680_c0_g1	479.992	-0.906197	0.236937	-3.82463	0.000130968	0.00917192
PC7722_c0_g1	54.3938	-0.892219	0.243216	-3.66842	0.000244052	0.0131014
PC2370_c1_g1	182.61	-0.891707	0.236234	-3.77468	0.000160215	0.0100557
PC127_c0_g1	517.3	-0.891347	0.292298	-3.04945	0.00229263	0.041928
PC3955_c0_g1	6183.66	-0.886875	0.275186	-3.22282	0.00126934	0.0310074
PC2947_c0_g1	1321.92	-0.882176	0.219843	-4.01277	6.00116e-05	0.00561345
PC1444_c4_g2	98.1505	-0.881038	0.201073	-4.38168	1.17765e-05	0.00232135
PC35346_c0_g3	153.127	-0.875512	0.23921	-3.66001	0.000252203	0.013369
PC948_c0_g1	10426.7	-0.868238	0.26277	-3.30417	0.000952567	0.0271727
PC6189_c0_g1	791.125	-0.848765	0.247334	-3.43166	0.000599894	0.0206775
PC675_c0_g1	694.974	-0.846768	0.285582	-2.96506	0.00302626	0.0491982
PC28557_c0_g1	738.377	-0.845169	0.262384	-3.22112	0.00127692	0.0310074
PC1880_c0_g1	239.257	-0.839239	0.26438	-3.17437	0.00150163	0.0339848
PC2573_c0_g1	800.772	-0.838903	0.273344	-3.06904	0.00214751	0.0407397
PC7741_c0_g1	3316.33	-0.831969	0.256305	-3.24602	0.00117032	0.0304113
PC272_c1_g1	662.647	-0.831723	0.256853	-3.23813	0.00120315	0.0305979
PC600_c0_g1	475.172	-0.828397	0.266072	-3.11343	0.00184924	0.0380573
PC21056_c0_g1	640.058	-0.827855	0.201381	-4.11088	3.94148e-05	0.00447962
PC3456_c0_g3	4635.54	-0.824983	0.27977	-2.94879	0.00319021	0.049871
PC1832_c0_g1	1054.27	-0.819232	0.229273	-3.57318	0.000352677	0.0160424
PC28904_c1_g1	71.4697	-0.819214	0.238931	-3.42866	0.00060657	0.020816
PC1273_c0_g1	1686.25	-0.816208	0.238463	-3.42279	0.00061983	0.0210767
PC2044_c2_g1	113.53	-0.813289	0.275639	-2.95056	0.00317202	0.049871
PC11133_c0_g1	6154.89	-0.80147	0.24018	-3.33696	0.000847001	0.0250634
PC11603_c0_g2	1151.92	-0.7866	0.204616	-3.84428	0.000120908	0.00876615
PC9670_c0_g1	612.044	-0.776183	0.225669	-3.43948	0.000582829	0.0203067
PC8436_c0_g2	238.489	-0.775011	0.248064	-3.12424	0.00178268	0.0371111
PC13807_c0_g1	244.288	-0.774478	0.223319	-3.46804	0.000524276	0.0196369
PC16693_c0_g1	96.3539	-0.764446	0.21377	-3.57602	0.000348864	0.016004
PC3464_c0_g1	630.999	-0.76301	0.241088	-3.16486	0.00155158	0.0343403
PC97011_c0_g1	42.8865	-0.760457	0.255332	-2.9783	0.00289849	0.0482088
PC11290_c0_g1	4012.32	-0.759557	0.203404	-3.73422	0.000188296	0.0111002
PC2229_c0_g1	1747.1	-0.757203	0.256951	-2.94688	0.00320998	0.0499259
PC3382_c0_g1	95.7894	-0.749392	0.238189	-3.1462	0.00165405	0.0357678
PC352_c0_g2	1475.51	-0.74767	0.212637	-3.51618	0.000437804	0.0181086
PC4836_c2_g1	64.0131	-0.745086	0.236844	-3.1459	0.00165577	0.0357678
PC16991_c0_g1	7899.7	-0.743627	0.191109	-3.89112	9.97821e-05	0.00786751
PC3262_c0_g1	11493.4	-0.739659	0.243444	-3.03831	0.00237906	0.0426928
PC116768_c0_g1	707.071	-0.726673	0.196607	-3.69606	0.000218969	0.0121158
PC1026_c0_g1	5991.9	-0.72544	0.199462	-3.63699	0.000275842	0.0139754
PC71342_c0_g1	680.72	-0.717828	0.206289	-3.47971	0.00050195	0.0193059
PC1809_c1_g1	929.536	-0.715735	0.228102	-3.13779	0.00170227	0.0362752
PC72_c0_g2	2921.06	-0.708969	0.235975	-3.00442	0.00266088	0.0456609
PC33563_c0_g1	9981.26	-0.705016	0.180016	-3.91642	8.98752e-05	0.00741059
PC1983_c1_g2	2803.25	-0.701982	0.215791	-3.25306	0.00114169	0.0300062
PC689_c0_g1	446.299	-0.701442	0.176789	-3.96768	7.25758e-05	0.00635819
PC5749_c0_g1	671.03	-0.695765	0.234218	-2.97059	0.00297226	0.0489372
PC1714_c0_g1	530.472	-0.695698	0.233353	-2.98132	0.00287012	0.0479576
PC10250_c1_g1	734.778	-0.694412	0.213843	-3.24731	0.00116503	0.0304113
PC2622_c0_g1	1427.6	-0.693462	0.216615	-3.20136	0.00136783	0.0321138
PC57897_c0_g1	1202.31	-0.691433	0.124481	-5.55454	2.78349e-08	2.19469e-05
PC2352_c2_g1	586.227	-0.688834	0.210393	-3.27403	0.00106027	0.0289823
PC3219_c0_g1	124.184	-0.68782	0.156925	-4.38312	1.16991e-05	0.00232135
PC21174_c0_g1	574.421	-0.683719	0.211436	-3.23369	0.00122202	0.030849
PC4885_c0_g2	382.371	-0.682679	0.158102	-4.31796	1.57481e-05	0.00264894
PC4733_c0_g1	117.93	-0.681119	0.212753	-3.20146	0.00136733	0.0321138
PC2726_c0_g1	1950.56	-0.678662	0.176723	-3.84027	0.000122899	0.00880925
PC844_c1_g6	213.359	-0.67743	0.193699	-3.49733	0.000469935	0.0187373
PC308_c2_g1	984.805	-0.670896	0.194073	-3.45693	0.000546368	0.0197008
PC5812_c0_g1	43.309	-0.664521	0.224475	-2.96033	0.00307307	0.0493235
PC8034_c0_g1	91.0972	-0.654726	0.220725	-2.96626	0.00301446	0.0491966
PC104_c0_g2	286.436	-0.654158	0.207206	-3.15705	0.00159376	0.0348677
PC4951_c0_g1	774.598	-0.654004	0.120859	-5.41131	6.2565e-08	4.15415e-05
PC9811_c0_g1	74.1184	-0.653205	0.19966	-3.27158	0.00106947	0.0289823
PC4452_c0_g1	1707.96	-0.651459	0.175827	-3.70512	0.000211289	0.0120068
PC160_c0_g3	799.374	-0.65084	0.159034	-4.09246	4.26825e-05	0.00468227
PC2171_c0_g1	966.709	-0.650627	0.196688	-3.30791	0.000939959	0.0270732
PC5039_c0_g1	409.434	-0.648668	0.217085	-2.98808	0.00280736	0.0472216
PC938_c0_g1	1388.5	-0.647486	0.148373	-4.36392	1.27753e-05	0.00240548
PC1693_c3_g3	3049.67	-0.645322	0.149643	-4.31242	1.6148e-05	0.00265122
PC21109_c0_g1	1728.81	-0.64479	0.192926	-3.34216	0.000831295	0.0249695
PC11691_c0_g1	1266.3	-0.633581	0.21417	-2.95831	0.00309331	0.0494597
PC698_c1_g1	694.037	-0.633547	0.212377	-2.98312	0.00285328	0.0477395
PC6682_c1_g1	147.896	-0.63289	0.206767	-3.06088	0.00220688	0.0415536
PC3888_c0_g1	313.426	-0.630546	0.208046	-3.0308	0.00243903	0.0435213
PC2955_c0_g1	121.661	-0.629708	0.213768	-2.94575	0.00322169	0.0499719
PC10588_c0_g1	9768.13	-0.626961	0.196593	-3.18914	0.00142697	0.0330281
PC27651_c0_g1	568.837	-0.624284	0.206099	-3.02904	0.00245331	0.0437142
PC1780_c0_g1	441.008	-0.623968	0.211579	-2.94911	0.00318694	0.049871
PC2843_c0_g1	67.3804	-0.623255	0.180272	-3.4573	0.000545623	0.0197008
PC1172_c2_g2	293.219	-0.617016	0.174513	-3.53565	0.000406773	0.0171055
PC10030_c0_g2	47.5541	-0.615138	0.184001	-3.34312	0.000828408	0.0249422
PC5711_c0_g1	2876.67	-0.602125	0.193978	-3.10409	0.00190864	0.0386493
PC271_c0_g1	525.784	-0.599469	0.195214	-3.07083	0.00213462	0.0406173
PC5623_c0_g1	1495.85	-0.5991	0.140753	-4.2564	2.07748e-05	0.00312006
PC4338_c0_g1	1078.73	-0.595121	0.198063	-3.0047	0.00265842	0.0456609
PC6783_c0_g1	1088.84	-0.59116	0.178979	-3.30295	0.000956721	0.0271727
PC13363_c0_g1	133.38	-0.589378	0.17102	-3.44626	0.00056841	0.0198957
PC14206_c0_g1	145.19	-0.587944	0.182514	-3.22137	0.00127581	0.0310074
PC7589_c0_g1	2502	-0.584155	0.188084	-3.10583	0.00189746	0.0384847
PC4889_c0_g1	186.353	-0.583692	0.185664	-3.1438	0.0016677	0.0358412
PC3330_c1_g1	1224.56	-0.579463	0.196025	-2.95607	0.00311587	0.0496944
PC15304_c0_g1	999.412	-0.567115	0.103953	-5.45549	4.88389e-08	3.62428e-05
PC254_c0_g1	1734.66	-0.562657	0.173208	-3.24844	0.00116042	0.0303718
PC8083_c0_g1	170.326	-0.562366	0.190521	-2.95173	0.00316001	0.049871
PC2606_c0_g1	1738.41	-0.560805	0.145835	-3.84548	0.000120315	0.00876615
PC14828_c0_g1	4601.12	-0.55839	0.0970909	-5.75121	8.86084e-09	9.31533e-06
PC8738_c0_g1	903.968	-0.558063	0.156294	-3.57059	0.000356177	0.0160424
PC11360_c0_g1	150.009	-0.555936	0.159426	-3.48712	0.000488254	0.019011
PC3000_c0_g1	1121.87	-0.552866	0.168911	-3.27312	0.00106366	0.0289823
PC6988_c0_g1	1208.93	-0.550733	0.131108	-4.20059	2.66219e-05	0.00364751
PC5160_c0_g1	1753	-0.548079	0.163806	-3.3459	0.00082015	0.024812
PC3577_c2_g1	119.476	-0.542303	0.171764	-3.15726	0.00159259	0.0348677
PC12655_c2_g1	7299.5	-0.540461	0.128578	-4.20336	2.62979e-05	0.00364751
PC3010_c0_g1	557.728	-0.539814	0.128867	-4.18893	2.80274e-05	0.00368313
PC3636_c0_g1	299.908	-0.538274	0.17913	-3.00494	0.00265635	0.0456609
PC806_c1_g1	407.775	-0.536829	0.116292	-4.61621	3.90807e-06	0.00114656
PC2529_c0_g1	1345	-0.536642	0.166844	-3.21643	0.00129796	0.0312488
PC1957_c0_g1	8731.52	-0.530819	0.179157	-2.96288	0.00304779	0.049231
PC15647_c0_g1	6058.36	-0.523802	0.129304	-4.05093	5.10146e-05	0.0052119
PC10065_c0_g1	781.103	-0.523584	0.150075	-3.48882	0.000485158	0.0189489
PC37_c0_g1	6684.68	-0.519229	0.14236	-3.64729	0.000265019	0.0138155
PC8750_c0_g1	140.068	-0.517813	0.16467	-3.14454	0.00166347	0.0358181
PC5828_c0_g1	135.228	-0.517736	0.156457	-3.30912	0.000935912	0.0270183
PC2249_c2_g1	241.244	-0.516759	0.170847	-3.0247	0.00248883	0.0439745
PC11270_c0_g2	2788.1	-0.516525	0.150242	-3.43794	0.000586148	0.0203147
PC546_c11_g1	1292.66	-0.513363	0.167842	-3.05861	0.00222363	0.0418028
PC43316_c0_g2	4923.56	-0.512068	0.130926	-3.91111	9.18721e-05	0.00742957
PC6172_c0_g1	300.065	-0.510773	0.116069	-4.4006	1.07951e-05	0.00226977
PC5732_c1_g1	2425.77	-0.508704	0.136089	-3.73804	0.000185463	0.0110363
PC5831_c0_g1	282.983	-0.504214	0.123196	-4.09278	4.26235e-05	0.00468227
PC14489_c0_g1	95.1972	-0.503559	0.145792	-3.45396	0.00055242	0.0197424
PC2246_c0_g2	249.778	-0.503466	0.165643	-3.03946	0.00237	0.0426858
PC10359_c0_g1	595.185	-0.500855	0.158104	-3.16789	0.0015355	0.0342063
PC6486_c0_g1	900.845	-0.498896	0.161155	-3.09576	0.00196312	0.0392447
PC39262_c0_g1	5595.85	-0.495137	0.133459	-3.71005	0.000207222	0.011829
PC4093_c0_g1	149.233	-0.493235	0.15101	-3.26624	0.00108986	0.0292535
PC17064_c0_g1	4614.51	-0.489563	0.145505	-3.36457	0.00076663	0.0237627
PC4283_c0_g1	3463.32	-0.48859	0.144297	-3.38601	0.000709169	0.0228109
PC2520_c0_g1	400.796	-0.487269	0.157565	-3.09249	0.00198483	0.0392489
PC5670_c0_g1	207.276	-0.487173	0.16453	-2.96099	0.00306652	0.0492819
PC7585_c0_g1	173.699	-0.484527	0.149941	-3.23146	0.00123158	0.030849
PC11803_c0_g1	4673.34	-0.481493	0.139555	-3.4502	0.000560164	0.0198815
PC6097_c0_g1	696.317	-0.479774	0.125667	-3.81781	0.000134642	0.00921758
PC2293_c0_g1	372.172	-0.478705	0.128863	-3.71485	0.000203323	0.0117124
PC227_c0_g1	7016.74	-0.476361	0.15205	-3.13293	0.00173071	0.0367572
PC93833_c0_g1	382.428	-0.473058	0.153937	-3.07306	0.00211879	0.0404639
PC17531_c0_g1	5266.87	-0.470978	0.122232	-3.85314	0.000116611	0.00865359
PC3877_c0_g1	242.577	-0.469685	0.131761	-3.56468	0.000364303	0.0160424
PC11470_c0_g1	239.838	-0.467904	0.150009	-3.11918	0.00181356	0.0376298
PC105601_c0_g1	5437.2	-0.467459	0.126432	-3.69732	0.000217892	0.0121093
PC11895_c1_g1	1632.32	-0.466556	0.138724	-3.36319	0.000770468	0.0238231
PC120578_c0_g1	3671.73	-0.465947	0.138193	-3.37171	0.000747039	0.0233853
PC13_c0_g4	682.632	-0.465421	0.129196	-3.60245	0.000315229	0.0151785
PC4443_c0_g1	2292.93	-0.465379	0.143436	-3.2445	0.00117656	0.0304113
PC8849_c0_g1	144.086	-0.465327	0.148911	-3.12487	0.00177881	0.0371111
PC359_c0_g1	3657.28	-0.464332	0.116716	-3.97832	6.94048e-05	0.00625411
PC3665_c1_g1	7958.01	-0.460998	0.141692	-3.25353	0.0011398	0.0300062
PC4021_c0_g1	827.226	-0.459626	0.129719	-3.54326	0.000395219	0.0167479
PC117533_c0_g1	217.481	-0.459359	0.153076	-3.00085	0.00269227	0.0458578
PC2449_c0_g2	1180.14	-0.458612	0.137766	-3.32891	0.000871857	0.0255789
PC1705_c0_g1	1246.69	-0.458607	0.106584	-4.30278	1.68667e-05	0.00272798
PC7923_c0_g1	4331.67	-0.458325	0.125638	-3.64798	0.000264312	0.0138155
PC444_c1_g1	132.231	-0.457904	0.133635	-3.42653	0.000611348	0.0208445
PC9072_c0_g1	3779.65	-0.456155	0.135941	-3.35553	0.000792133	0.0241965
PC17675_c1_g1	6647.91	-0.455608	0.122254	-3.72673	0.000193977	0.0113458
PC4923_c0_g1	4264.56	-0.45482	0.120654	-3.76963	0.00016349	0.0101602
PC13375_c0_g1	363.09	-0.453217	0.152929	-2.96357	0.00304092	0.049231
PC7475_c0_g1	1323.72	-0.451823	0.144602	-3.1246	0.00178046	0.0371111
PC814_c0_g2	248.185	-0.448879	0.130772	-3.43254	0.000597966	0.0206675
PC43880_c3_g2	2757.18	-0.443328	0.149911	-2.95728	0.00310371	0.0495631
PC3752_c0_g1	38355.1	-0.440492	0.144037	-3.0582	0.00222675	0.0418028
PC4064_c0_g1	612.576	-0.440125	0.109555	-4.01739	5.88472e-05	0.00561345
PC5814_c0_g1	346.916	-0.439581	0.143999	-3.05266	0.00226824	0.041928
PC20193_c0_g1	8429.95	-0.439194	0.134099	-3.27515	0.00105608	0.0289823
PC19593_c0_g1	5467.03	-0.437148	0.107442	-4.06871	4.72744e-05	0.00505415
PC20170_c0_g1	6154.87	-0.436472	0.12298	-3.54913	0.000386501	0.0164726
PC128435_c0_g1	203.73	-0.435889	0.144502	-3.0165	0.00255712	0.0448046
PC18346_c0_g1	155.792	-0.432149	0.142449	-3.03372	0.00241557	0.0432865
PC2913_c0_g1	10437.9	-0.432092	0.109397	-3.94975	7.82317e-05	0.00675981
PC15102_c0_g1	204.173	-0.428974	0.142538	-3.00955	0.00261637	0.0454639
PC29919_c0_g1	282.689	-0.426821	0.114261	-3.7355	0.000187344	0.0110959
PC2308_c1_g1	536.137	-0.42595	0.131964	-3.22779	0.00124753	0.0309198
PC9461_c0_g1	292.589	-0.425898	0.112038	-3.80138	0.000143891	0.00950397
PC16287_c0_g1	11033.9	-0.425576	0.0848268	-5.01699	5.24863e-07	0.00025467
PC11299_c0_g1	317.883	-0.421957	0.103991	-4.05761	4.9578e-05	0.00516902
PC93688_c0_g1	6323.42	-0.42161	0.111251	-3.7897	0.000150827	0.00965864
PC4577_c0_g1	10859	-0.420826	0.120158	-3.50227	0.00046131	0.018702
PC1471_c0_g2	1293.35	-0.420672	0.119684	-3.51486	0.000439981	0.0181342
PC16810_c0_g1	1080.26	-0.420605	0.134437	-3.12865	0.00175611	0.0370222
PC18053_c0_g1	861.305	-0.418255	0.120621	-3.46753	0.000525268	0.0196369
PC5250_c0_g1	227.24	-0.41682	0.118918	-3.50511	0.000456412	0.0186339
PC238_c0_g2	264.29	-0.416591	0.129919	-3.20655	0.00134338	0.031969
PC105896_c0_g1	6584.91	-0.413486	0.114707	-3.60471	0.000312501	0.0151048
PC5171_c0_g2	6494.14	-0.407205	0.091773	-4.4371	9.11809e-06	0.00205409
PC4447_c0_g1	241.456	-0.405249	0.132008	-3.06987	0.00214149	0.0406867
PC10072_c0_g1	302.501	-0.40499	0.129956	-3.11637	0.00183095	0.0378662
PC14362_c0_g1	342.706	-0.404532	0.132418	-3.05496	0.0022509	0.0418206
PC3881_c0_g1	5584.05	-0.404113	0.130055	-3.10725	0.00188834	0.0383742
PC7219_c0_g1	540.535	-0.403617	0.115878	-3.48311	0.000495633	0.0191658
PC3389_c0_g1	474.469	-0.401955	0.122934	-3.26968	0.00107668	0.0289823
PC17400_c0_g1	6116.55	-0.401127	0.126034	-3.18268	0.00145919	0.0334621
PC1892_c0_g1	295.327	-0.395516	0.129485	-3.05454	0.00225407	0.0418206
PC2337_c0_g3	974.101	-0.392981	0.130963	-3.0007	0.00269356	0.0458578
PC14_c0_g1	829.234	-0.392245	0.127539	-3.0755	0.00210149	0.0404633
PC7740_c0_g1	6485.4	-0.390737	0.118941	-3.28514	0.00101932	0.0282476
PC995_c1_g1	7961.47	-0.388804	0.127573	-3.04769	0.00230606	0.0420037
PC36_c2_g1	345.814	-0.387239	0.123803	-3.12787	0.0017608	0.0370222
PC1664_c0_g1	1214.59	-0.380948	0.0909138	-4.19021	2.78697e-05	0.00368313
PC6329_c0_g1	8422.5	-0.380509	0.0890334	-4.27378	1.92189e-05	0.00299328
PC1232_c0_g1	5154.53	-0.378389	0.097545	-3.87913	0.000104832	0.00811355
PC4007_c2_g1	23485.8	-0.37723	0.127859	-2.95035	0.00317412	0.049871
PC93868_c0_g1	687.06	-0.37539	0.115036	-3.26324	0.00110146	0.0293773
PC26511_c0_g1	6962.54	-0.372234	0.103395	-3.60012	0.000318072	0.0151994
PC2397_c0_g1	160.999	-0.367425	0.122468	-3.00017	0.00269828	0.0458602
PC7889_c0_g1	330.026	-0.365897	0.123192	-2.97013	0.0029767	0.0489372
PC4011_c0_g1	236.365	-0.364357	0.113751	-3.20312	0.00135945	0.0320702
PC8076_c0_g1	12783.1	-0.364121	0.103378	-3.52223	0.000427925	0.0178168
PC995_c1_g2	1176.08	-0.356677	0.116713	-3.05602	0.00224298	0.0418206
PC4101_c0_g1	268.784	-0.352772	0.105247	-3.35184	0.000802762	0.024403
PC14440_c0_g1	6252.86	-0.352303	0.109034	-3.23112	0.00123308	0.030849
PC1157_c0_g1	1150.5	-0.350804	0.111724	-3.13993	0.00168988	0.0361333
PC1129_c0_g1	286.63	-0.34386	0.112541	-3.05541	0.0022475	0.0418206
PC11525_c0_g1	13618.2	-0.343439	0.082494	-4.1632	3.13816e-05	0.00388132
PC4829_c0_g1	6201.34	-0.337659	0.107297	-3.14694	0.00164988	0.035763
PC3291_c0_g1	4196.65	-0.335672	0.107258	-3.12958	0.00175056	0.0370222
PC8020_c0_g1	11599.5	-0.329842	0.0821549	-4.01488	5.94762e-05	0.00561345
PC48_c0_g3	3178.85	-0.324953	0.0750903	-4.32749	1.50818e-05	0.00260636
PC5595_c0_g1	7054.38	-0.319777	0.100204	-3.19126	0.00141656	0.0329108
PC8506_c1_g1	239.193	-0.319616	0.106157	-3.01077	0.00260585	0.0454639
PC8178_c0_g1	5449.27	-0.316753	0.0864953	-3.66208	0.000250173	0.013369
PC362_c1_g1	1458.43	-0.307237	0.0954762	-3.21795	0.00129112	0.0312033
PC2406_c0_g1	745.472	-0.29649	0.0919478	-3.22455	0.00126171	0.0310074
PC402_c0_g1	4894.19	-0.295475	0.0810904	-3.64378	0.000268666	0.0138706
PC9896_c0_g1	341.418	-0.28717	0.0931146	-3.08405	0.00204206	0.0398787
PC1778_c0_g1	5157.16	-0.281578	0.095403	-2.95146	0.00316278	0.049871
PC1422_c0_g1	1127.47	-0.219566	0.0743946	-2.95136	0.00316374	0.049871
PC2013_c0_g1	855.45	0.231247	0.0758982	3.0468	0.00231291	0.042044
PC2072_c0_g1	1061.34	0.252914	0.0722463	3.50072	0.000464011	0.018702
PC20095_c0_g1	636.378	0.284995	0.0929136	3.06731	0.00215994	0.0409025
PC1516_c1_g2	148.494	0.355702	0.112757	3.15458	0.00160727	0.0350199
PC1377_c1_g1	939.562	0.373824	0.108151	3.4565	0.000547244	0.0197008
PC2579_c0_g1	5798.43	0.378157	0.124003	3.04959	0.00229155	0.041928
PC2244_c0_g1	770.089	0.421421	0.133053	3.16732	0.00153849	0.0342063
PC1919_c0_g1	24601.7	0.437992	0.130838	3.34759	0.000815161	0.0247203
PC1576_c0_g1	1596.9	0.453989	0.142401	3.18811	0.00143208	0.0330281
PC5955_c0_g1	2578.17	0.464068	0.157349	2.9493	0.00318499	0.049871
PC4464_c0_g1	1276.98	0.482084	0.153369	3.1433	0.00167056	0.0358417
PC4004_c0_g1	2710.49	0.484477	0.153246	3.16143	0.00156995	0.0346253
PC4847_c0_g1	909.737	0.511576	0.162051	3.15689	0.00159459	0.0348677
PC3812_c0_g3	76.3615	0.512541	0.172565	2.97013	0.00297674	0.0489372
PC164_c2_g2	580.171	0.519349	0.171645	3.02572	0.00248042	0.0439692
PC774_c0_g1	869.899	0.524137	0.177945	2.9455	0.00322437	0.0499719
PC18088_c0_g1	167.478	0.525016	0.165489	3.17251	0.00151127	0.0339848
PC7491_c1_g1	252.763	0.530274	0.174828	3.03312	0.00242037	0.0432919
PC2325_c0_g1	1307.69	0.532199	0.136021	3.91263	9.12978e-05	0.00742957
PC1679_c0_g1	860.023	0.538891	0.149468	3.6054	0.000311672	0.0151048
PC4291_c0_g2	434.99	0.543444	0.155525	3.49424	0.00047541	0.0188249
PC2803_c0_g1	203.169	0.547345	0.185228	2.95498	0.00312689	0.0497444
PC581_c0_g1	317.955	0.549239	0.186283	2.94841	0.00319415	0.049871
PC11008_c0_g1	3089.46	0.550249	0.136439	4.03293	5.50862e-05	0.00542922
PC238_c1_g1	345.786	0.55042	0.150397	3.65979	0.000252419	0.013369
PC4846_c0_g2	195.555	0.552174	0.156455	3.52929	0.00041667	0.0174635
PC14143_c0_g1	196.385	0.552814	0.182277	3.03283	0.00242274	0.0432919
PC7269_c0_g1	244.29	0.558911	0.186031	3.0044	0.00266107	0.0456609
PC15486_c0_g1	943.85	0.561513	0.17003	3.30244	0.000958473	0.0271727
PC588_c0_g1	287.279	0.563435	0.17577	3.20553	0.00134815	0.031969
PC1103_c0_g1	121.345	0.564217	0.176462	3.19739	0.00138678	0.0323981
PC10549_c0_g2	233.881	0.566896	0.168882	3.35676	0.000788628	0.0241965
PC74_c0_g1	4536.46	0.579532	0.180073	3.21832	0.00128946	0.0312033
PC12401_c0_g1	117.574	0.588927	0.178527	3.29881	0.000970967	0.027342
PC5961_c0_g1	145.158	0.59799	0.200192	2.98708	0.00281654	0.047313
PC2825_c0_g1	3783.05	0.598044	0.186561	3.20562	0.0013477	0.031969
PC7035_c0_g1	20408.1	0.599701	0.138823	4.3199	1.56098e-05	0.00264894
PC12013_c0_g1	4068.23	0.602235	0.202775	2.96997	0.0029783	0.0489372
PC530_c0_g1	2334.32	0.604709	0.180057	3.35844	0.000783851	0.0241777
PC581_c1_g1	95.3529	0.612419	0.189653	3.22916	0.00124157	0.0308934
PC25357_c0_g1	319.434	0.61365	0.205131	2.99151	0.00277602	0.0468821
PC2794_c0_g1	480.501	0.617507	0.159542	3.8705	0.000108612	0.00825415
PC1564_c0_g1	170.758	0.626743	0.174058	3.60077	0.000317281	0.0151994
PC10033_c0_g2	37.4865	0.628721	0.198027	3.17492	0.00149879	0.0339848
PC1793_c0_g4	166.661	0.628787	0.138165	4.55099	5.33947e-06	0.00144764
PC1019_c0_g2	576.577	0.633486	0.204319	3.10047	0.00193214	0.0389375
PC5010_c0_g1	295.816	0.636321	0.198664	3.203	0.00136004	0.0320702
PC4175_c0_g2	598.472	0.637179	0.139528	4.56668	4.95519e-06	0.00138916
PC1950_c0_g1	307.391	0.641781	0.196168	3.27158	0.00106947	0.0289823
PC3445_c0_g1	188.714	0.646031	0.163743	3.94541	7.96645e-05	0.0068145
PC1453_c0_g1	151.929	0.646179	0.188532	3.42743	0.000609324	0.0208318
PC4080_c0_g1	958.587	0.647269	0.180277	3.59041	0.000330154	0.0154758
PC27946_c0_g1	115.663	0.648512	0.214464	3.02388	0.00249559	0.0440323
PC484_c0_g1	801.39	0.649974	0.213892	3.03879	0.00237528	0.0426858
PC925_c0_g8	66.4633	0.656476	0.206917	3.17266	0.00151052	0.0339848
PC1793_c2_g1	39.6909	0.658523	0.212869	3.09356	0.00197773	0.0392489
PC26568_c0_g1	164.517	0.658572	0.212246	3.10287	0.00191657	0.0387475
PC4881_c0_g1	171.807	0.66186	0.17893	3.69899	0.00021646	0.0120829
PC6763_c0_g1	128.109	0.664348	0.223725	2.96948	0.00298305	0.0489372
PC47_c1_g1	317.031	0.664456	0.206105	3.22387	0.00126469	0.0310074
PC4107_c1_g2	151.686	0.669821	0.191711	3.4939	0.000476013	0.0188249
PC7536_c0_g1	43.5074	0.670003	0.225569	2.97028	0.00297529	0.0489372
PC2306_c0_g1	399.248	0.675373	0.18144	3.72229	0.000197422	0.0114773
PC25388_c0_g1	246.251	0.675488	0.160987	4.19591	2.71781e-05	0.00364751
PC2489_c1_g1	63.1623	0.676247	0.229164	2.95093	0.00316818	0.049871
PC2162_c0_g1	306.252	0.677345	0.169738	3.99053	6.59269e-05	0.00600253
PC3405_c1_g1	2550.21	0.680547	0.205511	3.31149	0.000928009	0.0268516
PC15183_c0_g1	178.12	0.683856	0.187706	3.64323	0.000269242	0.0138706
PC6605_c0_g1	68.2943	0.687312	0.212088	3.24069	0.00119242	0.0305751
PC4919_c0_g1	54.382	0.690077	0.208932	3.30288	0.000956972	0.0271727
PC31489_c0_g2	42.4252	0.698746	0.216902	3.22148	0.0012753	0.0310074
PC10173_c0_g1	194.935	0.700222	0.232653	3.00973	0.00261479	0.0454639
PC12847_c0_g1	75.497	0.701079	0.196801	3.56238	0.000367503	0.0160424
PC10174_c0_g1	472.077	0.701228	0.123176	5.6929	1.24901e-08	1.21207e-05
PC1714_c2_g1	60.1964	0.701724	0.225262	3.11515	0.00183851	0.0379603
PC289_c0_g1	9565.39	0.707936	0.15708	4.50686	6.57938e-06	0.00162749
PC7615_c0_g1	429.654	0.71373	0.233664	3.05452	0.00225421	0.0418206
PC10834_c0_g1	2192.43	0.71547	0.225913	3.16702	0.0015401	0.0342063
PC4575_c0_g1	187.514	0.71684	0.225822	3.17436	0.00150168	0.0339848
PC542_c0_g1	391.397	0.721301	0.112348	6.42025	1.36049e-10	2.24805e-07
PC1961_c2_g1	564.033	0.723885	0.221742	3.26454	0.00109644	0.0293053
PC7191_c0_g1	38.688	0.728275	0.215128	3.38531	0.000710975	0.0228109
PC22605_c0_g1	61.1392	0.728828	0.24564	2.96706	0.00300663	0.0491596
PC24837_c0_g1	3764.07	0.730951	0.237376	3.07929	0.00207494	0.0402051
PC3103_c1_g1	69.851	0.735286	0.231692	3.17354	0.0015059	0.0339848
PC3808_c0_g1	172.174	0.739625	0.228869	3.23166	0.00123074	0.030849
PC1704_c0_g2	56.4263	0.740938	0.21789	3.40051	0.000672595	0.0221544
PC26624_c0_g1	297.62	0.753227	0.237346	3.17354	0.00150593	0.0339848
PC26196_c0_g1	905.832	0.762481	0.233189	3.26979	0.00107627	0.0289823
PC3050_c0_g2	704.643	0.767818	0.236133	3.25163	0.00114745	0.0300949
PC6898_c0_g1	364.675	0.76958	0.203951	3.77336	0.000161061	0.0100587
PC191_c0_g1	337.082	0.775661	0.179004	4.33319	1.46963e-05	0.00260636
PC8861_c0_g1	88.2737	0.778728	0.259334	3.00279	0.00267513	0.0457271
PC76_c1_g1	1013.87	0.786076	0.262079	2.99939	0.00270524	0.0458709
PC7601_c0_g1	31.6332	0.790666	0.253886	3.11426	0.0018441	0.0380134
PC57_c3_g1	56.3292	0.792359	0.258745	3.06232	0.0021963	0.0414162
PC12925_c0_g1	99.3986	0.793055	0.262182	3.02482	0.0024878	0.0439745
PC31761_c0_g1	25.7765	0.793121	0.24312	3.26226	0.00110526	0.0294165
PC9176_c0_g1	301.919	0.794398	0.245258	3.23903	0.00119937	0.0305979
PC12023_c4_g1	189.359	0.794687	0.180881	4.39341	1.11586e-05	0.0022705
PC1695_c4_g1	29.4467	0.795056	0.264807	3.0024	0.00267864	0.0457271
PC27574_c0_g1	164.255	0.795412	0.237032	3.35571	0.000791606	0.0241965
PC18906_c0_g1	121.567	0.796463	0.24616	3.23555	0.0012141	0.0307559
PC1073_c0_g2	57.2296	0.798363	0.213264	3.74354	0.000181443	0.0110326
PC25002_c0_g2	91.3859	0.811716	0.274085	2.96155	0.00306094	0.0492819
PC6821_c0_g3	216.197	0.811902	0.216066	3.75766	0.000171509	0.0105033
PC24881_c0_g1	18.1623	0.811975	0.266068	3.05176	0.00227507	0.041928
PC9911_c0_g1	1400.08	0.818445	0.268398	3.04937	0.00229324	0.041928
PC132_c0_g1	929.167	0.823222	0.243261	3.38411	0.0007141	0.0228109
PC960_c2_g2	72.5084	0.829812	0.268025	3.09603	0.00196133	0.0392447
PC6765_c1_g2	33.7268	0.83512	0.28138	2.96794	0.00299801	0.0491187
PC10768_c0_g1	60.7091	0.835372	0.250129	3.33976	0.000838508	0.0250634
PC21641_c0_g1	90.6326	0.835383	0.271861	3.07283	0.00212038	0.0404639
PC11694_c0_g2	436.144	0.836725	0.26237	3.1891	0.00142717	0.0330281
PC9484_c0_g1	85.3313	0.839043	0.210298	3.98977	6.6137e-05	0.00600253
PC1841_c0_g1	530.284	0.840254	0.216859	3.87465	0.000106779	0.00821386
PC28766_c0_g1	215.204	0.852051	0.274206	3.10734	0.00188782	0.0383742
PC70511_c0_g2	30.5248	0.852867	0.255615	3.33653	0.000848326	0.0250634
PC1147_c4_g1	594.282	0.86305	0.254301	3.39381	0.000689286	0.0225277
PC8113_c2_g1	83.652	0.86429	0.214638	4.02674	5.65563e-05	0.0055309
PC13219_c0_g1	110.65	0.864696	0.279593	3.0927	0.00198344	0.0392489
PC10438_c0_g1	79.0702	0.864795	0.277964	3.11117	0.00186347	0.0381318
PC5211_c0_g1	97.9364	0.871349	0.250727	3.47529	0.000510293	0.0194037
PC7413_c1_g2	23.2734	0.875089	0.261679	3.34413	0.000825418	0.0249116
PC7197_c1_g1	46.6774	0.878208	0.257058	3.41638	0.000634593	0.0213833
PC21104_c1_g2	28.2779	0.886667	0.291151	3.04539	0.00232379	0.042181
PC5393_c0_g1	41.8247	0.887454	0.217329	4.08346	4.43693e-05	0.00482535
PC45958_c0_g1	83.2677	0.896542	0.170881	5.24659	1.54937e-07	8.88456e-05
PC7121_c0_g1	205.092	0.89702	0.158963	5.64296	1.67155e-08	1.50624e-05
PC10074_c0_g1	48.2052	0.898806	0.271332	3.31257	0.000924424	0.0268093
PC28325_c0_g2	1289.22	0.909304	0.237066	3.83566	0.000125226	0.00887521
PC11419_c0_g1	131.451	0.909766	0.269742	3.37273	0.000744275	0.0233853
PC10095_c0_g1	22.2262	0.910305	0.302469	3.00958	0.00261608	0.0454639
PC3063_c0_g1	67.5885	0.911555	0.288323	3.16158	0.00156916	0.0346253
PC3680_c0_g1	393.833	0.915649	0.271782	3.36905	0.000754269	0.0235532
PC52878_c0_g2	76.2445	0.920709	0.305782	3.011	0.00260385	0.0454639
PC73_c2_g2	35.62	0.923319	0.221607	4.16646	3.09361e-05	0.0038641
PC19218_c0_g1	22.1089	0.924224	0.308292	2.99788	0.00271864	0.0460362
PC13795_c1_g1	30.1999	0.936298	0.255026	3.67138	0.000241246	0.0130062
PC39223_c0_g2	22.0011	0.947	0.28746	3.29437	0.000986421	0.0276538
PC36767_c0_g2	467.405	0.947431	0.315157	3.00621	0.00264522	0.0456609
PC591_c0_g1	1572.04	0.950149	0.262404	3.62093	0.000293543	0.0145237
PC7317_c0_g1	138.316	0.955155	0.224071	4.26274	2.01938e-05	0.00306934
PC18875_c1_g1	20.5945	0.963042	0.326302	2.95138	0.00316357	0.049871
PC5067_c0_g1	754.545	0.967548	0.320859	3.01549	0.00256563	0.0448915
PC8627_c0_g1	116.573	0.975832	0.267197	3.65211	0.000260095	0.0136718
PC37903_c1_g1	256.848	0.984754	0.334207	2.94654	0.0032135	0.0499259
PC27762_c1_g1	127.725	0.98802	0.290154	3.40515	0.000661266	0.0219378
PC4827_c0_g1	342.088	0.997595	0.287696	3.46753	0.000525273	0.0196369
PC9032_c0_g1	99.0687	0.999432	0.261415	3.82316	0.000131753	0.00917192
PC2095_c0_g1	1577.24	1.00962	0.289081	3.49251	0.000478504	0.0188643
PC6727_c0_g1	681.228	1.01418	0.255306	3.97239	7.11542e-05	0.00635819
PC14121_c0_g1	44.141	1.02249	0.248482	4.11495	3.87257e-05	0.00444131
PC14293_c0_g3	25.6471	1.02386	0.266565	3.84095	0.000122558	0.00880925
PC18746_c0_g2	24.6046	1.02658	0.344813	2.97722	0.00290876	0.0482836
PC36718_c0_g1	196.449	1.03883	0.306318	3.39134	0.000695522	0.0226424
PC11219_c0_g1	41.3119	1.04204	0.278671	3.73931	0.000184525	0.0110326
PC23620_c0_g1	48.2315	1.04634	0.323952	3.22992	0.00123825	0.0308718
PC4831_c0_g2	28.1586	1.05289	0.293124	3.59198	0.000328174	0.0154758
PC288_c0_g3	278.952	1.05448	0.212271	4.9676	6.77856e-07	0.000294879
PC12778_c0_g1	92.8941	1.05653	0.25238	4.18628	2.83569e-05	0.00368801
PC45436_c0_g1	466.72	1.05754	0.295036	3.58443	0.000337815	0.0156714
PC2358_c0_g1	254.357	1.05843	0.253973	4.16749	3.07977e-05	0.0038641
PC94564_c0_g1	17.9503	1.05933	0.337792	3.13605	0.00171239	0.0364295
PC4068_c3_g1	23.8851	1.05935	0.295119	3.58958	0.000331217	0.0154758
PC5672_c0_g1	283.701	1.06149	0.340536	3.1171	0.00182638	0.0378336
PC21823_c0_g3	29.2675	1.07155	0.309868	3.45807	0.000544056	0.0197008
PC17117_c1_g1	50.5355	1.08218	0.353993	3.05706	0.00223523	0.0418206
PC12760_c0_g1	18.3839	1.08874	0.343641	3.16825	0.00153362	0.0342063
PC4076_c0_g2	13.0079	1.09136	0.34764	3.13934	0.00169329	0.0361451
PC54910_c0_g1	24.4307	1.09869	0.323722	3.39394	0.000688947	0.0225277
PC17202_c0_g1	22.4828	1.1071	0.298999	3.70268	0.00021333	0.0120221
PC12046_c0_g3	41.1964	1.10837	0.345488	3.20812	0.00133608	0.0318894
PC18287_c0_g2	158.466	1.10979	0.264265	4.19952	2.67483e-05	0.00364751
PC9007_c0_g1	77.0503	1.1132	0.284914	3.90715	9.33926e-05	0.00750442
PC19533_c1_g1	136.43	1.11442	0.313448	3.55537	0.000377446	0.0163631
PC37810_c0_g1	379.758	1.11857	0.279185	4.00655	6.16109e-05	0.00571509
PC2149_c0_g1	44.0634	1.12	0.276475	4.05099	5.10009e-05	0.0052119
PC10006_c0_g1	41.3107	1.12534	0.341234	3.29786	0.000974247	0.0273733
PC3483_c0_g2	13.3918	1.12882	0.30994	3.64205	0.000270474	0.0138706
PC7749_c0_g1	197.394	1.12891	0.373053	3.02612	0.00247711	0.0439692
PC49401_c0_g1	18.4161	1.13471	0.371876	3.05133	0.00227831	0.041928
PC4586_c1_g1	69.4542	1.14131	0.379733	3.00557	0.00265087	0.0456609
PC53141_c0_g1	23.9484	1.14481	0.344884	3.31942	0.000902043	0.0262923
PC10308_c1_g1	27.5111	1.14577	0.322178	3.55633	0.00037607	0.0163597
PC11229_c0_g1	34.7222	1.15114	0.38814	2.9658	0.003019	0.0491982
PC8666_c10_g1	33.1181	1.15328	0.323417	3.56593	0.000362563	0.0160424
PC75177_c0_g1	34.7204	1.16063	0.391194	2.96689	0.0030083	0.0491596
PC29220_c0_g1	61.5843	1.16231	0.355406	3.27039	0.00107401	0.0289823
PC18235_c0_g1	266.734	1.16669	0.336956	3.46244	0.000535309	0.0197008
PC46073_c0_g1	38.719	1.16707	0.37952	3.07512	0.00210419	0.0404633
PC9139_c0_g1	25.3623	1.17181	0.367073	3.19232	0.00141137	0.0328508
PC128407_c0_g1	32.4755	1.17366	0.310396	3.78116	0.000156102	0.00989597
PC15223_c0_g1	82.374	1.17522	0.299771	3.92041	8.83975e-05	0.0073367
PC6466_c0_g3	21.7351	1.1785	0.268192	4.39424	1.11159e-05	0.0022705
PC2865_c2_g1	50.1314	1.18211	0.391314	3.02088	0.0025204	0.044408
PC2759_c0_g1	661.418	1.19301	0.346048	3.44752	0.000565768	0.0198815
PC5341_c0_g1	21.1173	1.19354	0.353128	3.37992	0.00072508	0.0230409
PC15041_c0_g1	18.978	1.20265	0.377294	3.18756	0.00143479	0.0330303
PC19497_c0_g1	195.733	1.2271	0.35406	3.46581	0.00052864	0.0196575
PC8769_c0_g1	180.556	1.22801	0.397078	3.09262	0.00198399	0.0392489
PC12667_c0_g1	67.9792	1.23151	0.320896	3.83773	0.000124175	0.00885042
PC5609_c0_g1	212.565	1.24409	0.4082	3.04774	0.0023057	0.0420037
PC1445_c4_g2	18.173	1.24479	0.355976	3.49683	0.000470829	0.0187373
PC30499_c0_g3	19.1442	1.24646	0.353534	3.52572	0.000422333	0.0176422
PC10726_c1_g1	17.6843	1.25573	0.306074	4.10268	4.08385e-05	0.00455927
PC3163_c2_g1	22.0622	1.25861	0.339964	3.70219	0.000213748	0.0120221
PC11826_c0_g2	21.4676	1.25886	0.402741	3.12574	0.0017736	0.0371111
PC31141_c0_g1	18.5076	1.26127	0.38708	3.25842	0.00112035	0.0296928
PC9599_c1_g1	16.2246	1.2673	0.410365	3.08822	0.00201359	0.0394948
PC26043_c3_g1	8.96387	1.27733	0.400957	3.18571	0.00144399	0.0331816
PC8452_c0_g1	60.6865	1.27752	0.413286	3.09114	0.00199392	0.0392565
PC42397_c0_g1	39.4028	1.29553	0.394193	3.28654	0.00101427	0.0281839
PC5222_c1_g1	128.199	1.29986	0.395432	3.28719	0.00101193	0.028181
PC10137_c0_g3	13.5464	1.30183	0.427904	3.04235	0.00234735	0.0425474
PC5016_c0_g2	10.3379	1.30486	0.399104	3.26948	0.00107746	0.0289823
PC7065_c1_g2	9.65809	1.31198	0.438935	2.989	0.0027989	0.0472052
PC23817_c0_g1	14.8672	1.31471	0.378784	3.47087	0.00051877	0.0196369
PC28_c0_g1	89.5446	1.31546	0.388202	3.38859	0.00070254	0.0227254
PC27948_c0_g2	11.5027	1.31904	0.445147	2.96316	0.00304502	0.049231
PC27913_c1_g1	29.1922	1.32406	0.423558	3.12604	0.00177176	0.0371111
PC13924_c0_g1	62.1842	1.33125	0.375741	3.54299	0.000395615	0.0167479
PC129046_c0_g1	7.3079	1.33308	0.446119	2.98818	0.00280645	0.0472216
PC894_c0_g3	10.3871	1.34039	0.428488	3.12818	0.00175891	0.0370222
PC11138_c0_g1	1058.05	1.34599	0.376167	3.57817	0.000346008	0.0159309
PC45070_c0_g1	16.3196	1.34697	0.38508	3.49791	0.000468925	0.0187373
PC11090_c0_g1	95.1664	1.35726	0.283246	4.79182	1.65278e-06	0.0005487
PC15645_c0_g1	15.5991	1.35742	0.398698	3.40463	0.000662541	0.0219378
PC13922_c1_g1	37.5633	1.35964	0.281198	4.83518	1.33025e-06	0.00046616
PC32420_c0_g1	82.7962	1.36664	0.395669	3.45401	0.000552324	0.0197424
PC17703_c0_g1	7.26914	1.36867	0.453418	3.01857	0.00253974	0.044663
PC37591_c0_g1	35.6001	1.37455	0.461277	2.97988	0.0028836	0.0480556
PC11783_c1_g1	13.1118	1.38163	0.431327	3.20321	0.00135904	0.0320702
PC127930_c0_g1	244.027	1.39105	0.445873	3.11983	0.00180955	0.0376086
PC21869_c0_g2	9.93316	1.41124	0.418273	3.37398	0.000740907	0.0233853
PC127653_c0_g1	30.161	1.42203	0.396729	3.58437	0.000337887	0.0156714
PC94787_c0_g1	13.1912	1.43724	0.398066	3.61054	0.000305556	0.0148992
PC10900_c1_g1	107.237	1.44906	0.293279	4.94089	7.77648e-07	0.000327014
PC7565_c0_g4	131.82	1.45797	0.458863	3.17737	0.0014862	0.0338432
PC14125_c2_g3	15.6353	1.46085	0.411513	3.54995	0.000385304	0.0164726
PC8397_c0_g1	21.8327	1.46575	0.403808	3.62981	0.000283625	0.0143123
PC1963_c1_g1	23.6764	1.46944	0.422558	3.47748	0.000506158	0.0193498
PC33254_c3_g3	38.6037	1.49679	0.372254	4.0209	5.79769e-05	0.0055835
PC9105_c0_g1	23.8012	1.4972	0.355793	4.20806	2.57576e-05	0.00364751
PC13409_c0_g1	24.9485	1.49741	0.368717	4.06114	4.88344e-05	0.00513392
PC2284_c0_g1	79.6769	1.50185	0.285921	5.25266	1.49922e-07	8.88456e-05
PC4402_c0_g3	17.9573	1.50484	0.3964	3.79627	0.000146887	0.00955184
PC38441_c0_g1	7.60646	1.53177	0.517162	2.96187	0.00305774	0.0492819
PC3456_c2_g2	13.4867	1.53255	0.437143	3.50584	0.000455173	0.0186339
PC12330_c0_g1	26.6976	1.53564	0.313574	4.89723	9.71979e-07	0.000380869
PC17460_c0_g1	63.0045	1.54586	0.473479	3.2649	0.00109503	0.0293053
PC4957_c1_g1	172.829	1.55376	0.520375	2.98584	0.00282799	0.0473792
PC106530_c0_g1	40.2044	1.56599	0.493792	3.17135	0.00151733	0.0340603
PC107717_c0_g1	20.1704	1.57791	0.504818	3.12569	0.00177386	0.0371111
PC10673_c0_g1	530.651	1.57861	0.246846	6.39514	1.60404e-10	2.24842e-07
PC31007_c0_g1	9.68451	1.58052	0.532191	2.96984	0.00297953	0.0489372
PC4911_c1_g1	75.4037	1.58341	0.323015	4.90197	9.48797e-07	0.000380869
PC5902_c0_g3	10.7552	1.58503	0.488624	3.24386	0.00117923	0.0304113
PC28522_c0_g1	17.6087	1.59072	0.486174	3.27191	0.00106824	0.0289823
PC17451_c0_g1	10.7178	1.60905	0.498705	3.22645	0.00125337	0.0309431
PC14494_c0_g3	42.5071	1.61976	0.474177	3.41594	0.000635625	0.0213833
PC35849_c0_g1	10.8088	1.62159	0.543025	2.98621	0.00282456	0.0473792
PC6466_c0_g2	6.56007	1.63087	0.551861	2.95522	0.00312448	0.0497444
PC30849_c0_g1	11.4472	1.64497	0.441441	3.72636	0.000194261	0.0113458
PC15903_c0_g1	20.2217	1.65212	0.370824	4.45527	8.37882e-06	0.00192187
PC1673_c0_g2	86.7889	1.66291	0.503955	3.29971	0.000967843	0.0273167
PC47221_c0_g1	17.8613	1.66291	0.47852	3.47511	0.000510644	0.0194037
PC2781_c0_g1	269.931	1.6758	0.557843	3.00407	0.0026639	0.0456609
PC2593_c0_g1	25.0399	1.67707	0.486411	3.44786	0.000565053	0.0198815
PC8683_c0_g1	529.511	1.67747	0.393445	4.26355	2.01206e-05	0.00306934
PC42359_c0_g8	11.2178	1.69121	0.488844	3.45961	0.000540958	0.0197008
PC194_c1_g1	45.1909	1.69715	0.256778	6.60941	3.85845e-11	9.73526e-08
PC4134_c1_g1	29.6756	1.70187	0.52678	3.2307	0.00123489	0.030849
PC12003_c0_g1	43.5924	1.70456	0.375161	4.54354	5.53163e-06	0.00144764
PC48279_c1_g2	7.53773	1.71529	0.496313	3.45606	0.000548133	0.0197008
PC8282_c0_g1	15.6893	1.73489	0.448549	3.86779	0.000109828	0.00829659
PC17961_c0_g2	21.3554	1.74487	0.491548	3.54974	0.000385611	0.0164726
PC41320_c0_g1	5.76657	1.7458	0.574486	3.0389	0.00237447	0.0426858
PC8914_c0_g1	7.12292	1.75075	0.53058	3.29969	0.000967902	0.0273167
PC68853_c0_g1	10.6466	1.79565	0.499656	3.59378	0.000325916	0.0154758
PC6680_c0_g1	9.5386	1.81254	0.553381	3.2754	0.00105511	0.0289823
PC19238_c0_g1	7.40899	1.82093	0.519839	3.50287	0.000460279	0.018702
PC17621_c1_g3	16.4748	1.84243	0.540734	3.40727	0.000656154	0.0219378
PC7093_c2_g1	14.7	1.86644	0.61098	3.05482	0.00225194	0.0418206
PC5136_c2_g1	1253.63	1.88007	0.637525	2.94902	0.00318784	0.049871
PC82851_c0_g1	171.956	1.92401	0.591139	3.25476	0.00113488	0.0300043
PC15458_c0_g3	19.4557	1.93257	0.467389	4.13482	3.55233e-05	0.00422778
PC9751_c1_g3	84.8195	1.96022	0.454601	4.31195	1.6182e-05	0.00265122
PC13630_c0_g1	17.0527	1.97596	0.623792	3.16766	0.00153673	0.0342063
PC30085_c0_g1	6.88707	1.98022	0.613926	3.2255	0.00125753	0.0309852
PC2775_c0_g1	175.532	1.98351	0.43316	4.57917	4.66834e-06	0.00133849
PC5967_c0_g2	32.3552	2.01974	0.635413	3.17862	0.00147978	0.0338191
PC44971_c0_g1	35.144	2.04991	0.662869	3.09248	0.00198492	0.0392489
PC34889_c0_g1	23.5146	2.05136	0.531553	3.85918	0.000113767	0.00854301
PC40367_c0_g1	10.5742	2.0822	0.703213	2.96098	0.00306657	0.0492819
PC2871_c1_g1	12.4083	2.11594	0.583917	3.62371	0.000290408	0.0145237
PC4334_c0_g1	55.003	2.1255	0.558737	3.80411	0.000142313	0.00950397
PC21810_c1_g1	22.8169	2.13727	0.490847	4.35424	1.33531e-05	0.00242592
PC2071_c1_g3	9.3691	2.24156	0.477747	4.69194	2.70633e-06	0.000832724
PC58752_c0_g1	7.33683	2.28015	0.712326	3.201	0.00136952	0.0321138
PC37813_c0_g1	7.17049	2.30082	0.663975	3.46522	0.000529789	0.0196575
PC2071_c1_g1	86.6488	2.39216	0.532165	4.49516	6.95189e-06	0.00165475
PC11597_c1_g2	9.29019	2.39532	0.593515	4.03582	5.44118e-05	0.00541152
PC55915_c1_g1	15.0057	2.41596	0.621643	3.88641	0.000101737	0.00792262
PC10446_c0_g1	10.4047	2.46482	0.763558	3.22807	0.00124629	0.0309198
PC43846_c0_g2	7.38756	2.46872	0.754469	3.27213	0.00106741	0.0289823
PC12611_c0_g1	6.07584	2.55824	0.676981	3.7789	0.000157525	0.00993627
PC6162_c0_g1	26.9625	2.61372	0.868918	3.00801	0.00262961	0.0456312
PC82651_c0_g1	15.3641	2.65336	0.827141	3.20787	0.0013372	0.0318894
PC54925_c0_g1	16.4504	2.68063	0.702315	3.81684	0.000135171	0.00921758
PC84105_c0_g1	9.91057	2.69498	0.777302	3.46709	0.00052612	0.0196369
PC26822_c3_g1	6.33839	2.70324	0.91374	2.95844	0.00309203	0.0494597
PC12467_c0_g1	21.4313	2.72147	0.906152	3.00333	0.00267045	0.0457111
PC15548_c0_g1	5.15303	2.74427	0.802329	3.42038	0.000625341	0.021207
PC8973_c0_g1	28.8235	2.77909	0.852047	3.26166	0.00110762	0.0294172
PC7886_c0_g1	35.578	2.83262	0.911331	3.10822	0.00188219	0.0383742
PC35915_c2_g1	54.6851	2.8424	0.78098	3.63953	0.000273133	0.0139502
PC13761_c0_g1	10.2835	2.92165	0.769081	3.79889	0.000145347	0.00953265
PC32993_c0_g1	7.58406	3.15646	1.02919	3.06695	0.00216258	0.0409025
PC2993_c1_g1	19.2511	3.18203	0.905511	3.51407	0.000441298	0.0181342
PC15082_c0_g1	27.5969	3.35611	0.941694	3.5639	0.000365382	0.0160424
PC14618_c0_g2	32.3141	3.44907	0.97074	3.55304	0.000380811	0.0163963
PC13100_c0_g1	24.9809	3.54743	0.87592	4.04995	5.12287e-05	0.0052119
PC1330_c1_g1	15.1592	3.63422	1.12619	3.22702	0.00125088	0.0309422
PC27338_c0_g1	70.7021	3.74299	0.838659	4.46307	8.07929e-06	0.00188749
PC14983_c0_g1	107.907	3.90811	0.609392	6.41313	1.42558e-10	2.24805e-07
PC4383_c0_g1	227.351	0.343631	0.116732	2.94375	0.00324264	0.0501932
PC11681_c0_g2	80.2871	-0.924668	0.314414	-2.94092	0.00327235	0.0505911
PC11743_c0_g1	600.782	-0.608386	0.206943	-2.93987	0.00328346	0.0507007
PC9448_c0_g1	102.89	-0.681259	0.231847	-2.9384	0.00329906	0.0508793
PC93869_c0_g1	9.78027	2.29303	0.780543	2.93773	0.00330624	0.0509278
PC1027_c1_g1	446.264	0.813734	0.277154	2.93603	0.00332441	0.0510919
PC61_c0_g2	705.539	-0.547581	0.186507	-2.93598	0.00332499	0.0510919
PC73333_c0_g1	179.724	-0.495225	0.168729	-2.93503	0.00333514	0.0511855
PC32436_c0_g3	41.7418	-3.24986	1.10751	-2.93439	0.00334208	0.0512297
PC3098_c0_g1	48.8035	0.593392	0.202283	2.93348	0.00335189	0.0512555
PC6849_c0_g1	546.3	0.892231	0.304144	2.93358	0.00335078	0.0512555
PC1038_c2_g2	170.931	-0.548879	0.187389	-2.92909	0.00339956	0.051761
PC1389_c1_g1	22.3283	1.06739	0.364435	2.9289	0.00340168	0.051761
PC14001_c0_g1	34.8833	0.80657	0.275557	2.92706	0.00342187	0.051761
PC18320_c1_g1	165.012	-0.568333	0.194103	-2.928	0.00341153	0.051761
PC2049_c0_g1	1441.34	0.741912	0.253238	2.9297	0.0033929	0.051761
PC321_c0_g1	4403.65	-0.643477	0.219737	-2.9284	0.00340711	0.051761
PC6428_c0_g1	235.345	-0.834541	0.285049	-2.9277	0.00341474	0.051761
PC6572_c4_g1	33.6503	0.944224	0.322501	2.92782	0.00341351	0.051761
PC72025_c0_g1	2162.75	-0.989161	0.337916	-2.92724	0.00341984	0.051761
PC19200_c0_g3	85.8254	1.10556	0.377804	2.92629	0.00343031	0.0518125
PC2546_c3_g1	7.39387	-1.26425	0.432402	-2.92378	0.00345814	0.0518125
PC25805_c0_g1	23.3022	-1.67942	0.574367	-2.92396	0.00345614	0.0518125
PC26940_c0_g1	15.4604	2.87861	0.9845	2.92393	0.00345642	0.0518125
PC3043_c0_g2	584.639	-0.507838	0.173626	-2.92489	0.00344579	0.0518125
PC621_c0_g1	14.2589	0.96703	0.330584	2.92522	0.00344218	0.0518125
PC7173_c0_g1	111.197	0.719962	0.246143	2.92498	0.00344479	0.0518125
PC972_c0_g1	186.76	0.432313	0.147829	2.92442	0.00345101	0.0518125
PC71795_c0_g1	3290.55	-0.351152	0.120122	-2.9233	0.0034634	0.0518297
PC10068_c1_g1	147.145	-0.365202	0.124969	-2.92234	0.00347414	0.051929
PC2117_c1_g2	2766.96	-1.13222	0.387592	-2.92117	0.00348716	0.0519609
PC4134_c1_g2	119.601	1.18245	0.404804	2.92104	0.00348863	0.0519609
PC52107_c1_g2	17.7162	-1.32973	0.455112	-2.92177	0.00348049	0.0519609
PC1023_c3_g1	48.839	0.794374	0.272266	2.91764	0.00352694	0.0523177
PC13244_c0_g1	35.5195	0.725121	0.248672	2.91597	0.00354585	0.0523177
PC1414_c3_g1	48.2548	0.763517	0.26161	2.91853	0.00351684	0.0523177
PC1990_c0_g1	7152.01	-0.440513	0.151054	-2.91627	0.00354242	0.0523177
PC21076_c0_g1	556.343	-1.74397	0.59815	-2.91561	0.00354992	0.0523177
PC3624_c1_g2	1198.74	0.939485	0.321961	2.91801	0.00352275	0.0523177
PC5293_c0_g1	489.588	-0.404717	0.13881	-2.91562	0.00354978	0.0523177
PC7400_c0_g1	135.757	0.686855	0.23555	2.91596	0.00354594	0.0523177
PC829_c0_g2	1395.81	-0.617196	0.211636	-2.91631	0.00354199	0.0523177
PC44764_c0_g1	6.79355	-1.56438	0.536767	-2.91445	0.00356312	0.0524511
PC10110_c0_g1	51.5168	1.20958	0.415145	2.91363	0.00357255	0.0525285
PC27862_c0_g1	16.0472	1.04433	0.358488	2.91316	0.00357792	0.0525462
PC3422_c0_g1	119.691	0.676505	0.23229	2.91233	0.00358744	0.0526171
PC4030_c0_g1	252.965	-0.418203	0.143613	-2.91201	0.00359108	0.0526171
PC19197_c0_g1	330.894	-0.332299	0.114167	-2.91064	0.00360691	0.0526655
PC4699_c0_g1	312.624	0.432821	0.148693	2.91083	0.00360467	0.0526655
PC4804_c0_g1	174.856	-0.432383	0.148533	-2.91103	0.00360244	0.0526655
PC3458_c0_g3	65.1074	0.713194	0.245143	2.9093	0.00362241	0.0528306
PC17009_c0_g1	95.1157	0.718987	0.247172	2.90885	0.00362755	0.0528446
PC116045_c0_g1	3995.27	-0.381717	0.131257	-2.90817	0.0036355	0.0528992
PC19669_c0_g1	1167.96	-0.784539	0.269897	-2.90681	0.00365132	0.0529197
PC1991_c0_g1	730.001	-1.27779	0.439614	-2.90661	0.00365369	0.0529197
PC45_c1_g1	1408.1	0.742211	0.255337	2.90679	0.0036516	0.0529197
PC4606_c0_g1	288.071	0.423424	0.145657	2.907	0.00364917	0.0529197
PC3440_c0_g1	899.565	-0.244789	0.0842637	-2.90503	0.0036722	0.0531268
PC4319_c0_g1	241.757	0.685612	0.236045	2.90458	0.00367743	0.0531416
PC10461_c0_g2	931.931	-1.72837	0.595164	-2.90403	0.00368391	0.0531743
PC1220_c2_g1	1302.65	-0.492	0.169473	-2.90312	0.00369467	0.0532687
PC11551_c0_g3	191.288	1.12098	0.386286	2.90195	0.00370848	0.0532851
PC528_c0_g1	963.323	-1.45896	0.502747	-2.90198	0.00370811	0.0532851
PC737_c0_g1	3758.43	-0.710002	0.244614	-2.90254	0.00370145	0.0532851
PC5695_c0_g1	445.406	-0.385186	0.132776	-2.90102	0.00371955	0.0533242
PC6820_c0_g1	1408.78	-0.67063	0.231171	-2.90101	0.00371965	0.0533242
PC1787_c0_g2	333.221	0.598791	0.206475	2.90007	0.0037308	0.0533248
PC19379_c0_g7	5.47487	2.35195	0.811036	2.89994	0.00373238	0.0533248
PC56_c6_g1	222.019	0.635278	0.219056	2.90007	0.00373085	0.0533248
PC7656_c0_g1	599.992	-0.42525	0.146682	-2.89912	0.0037421	0.0534032
PC6740_c0_g1	352.701	0.729031	0.251512	2.89859	0.00374844	0.0534332
PC2076_c0_g3	269.423	-1.18453	0.408758	-2.89788	0.00375699	0.0534741
PC3903_c0_g1	35.8405	1.07794	0.372004	2.89764	0.00375978	0.0534741
PC2205_c0_g1	554.259	-1.23485	0.426245	-2.89704	0.00376697	0.053516
PC8248_c0_g1	100.501	1.11366	0.384485	2.8965	0.00377355	0.0535492
PC232_c0_g1	1998.64	-0.367632	0.126942	-2.89606	0.00377885	0.0535642
PC71240_c0_g1	13.239	1.26327	0.436352	2.89507	0.00379068	0.0536716
PC10179_c0_g3	831.507	0.468637	0.162209	2.8891	0.00386344	0.0537525
PC13141_c0_g1	20.3921	1.19467	0.413219	2.89113	0.00383862	0.0537525
PC15026_c0_g1	5098.23	-0.390342	0.135163	-2.88793	0.00387789	0.0537525
PC16050_c0_g1	16.7026	-1.21052	0.418423	-2.89305	0.00381515	0.0537525
PC19336_c0_g3	5519.01	-0.707613	0.244962	-2.88866	0.00386886	0.0537525
PC2057_c0_g1	2813.13	0.584519	0.20229	2.88951	0.00385844	0.0537525
PC2778_c0_g1	376.734	-0.349563	0.120877	-2.8919	0.00382925	0.0537525
PC31049_c0_g1	348.949	-0.668173	0.231121	-2.89101	0.0038401	0.0537525
PC31208_c0_g1	333.729	0.822046	0.284268	2.8918	0.00383039	0.0537525
PC3224_c0_g1	344.756	-0.533487	0.184679	-2.88873	0.00386801	0.0537525
PC32711_c0_g1	75.316	0.703129	0.243475	2.88789	0.00387836	0.0537525
PC4083_c0_g1	1924.07	0.679223	0.234734	2.89358	0.00380872	0.0537525
PC41311_c0_g1	4771.04	-0.638536	0.220693	-2.89332	0.00381194	0.0537525
PC57131_c4_g1	32.7757	-1.65781	0.574088	-2.88773	0.00388035	0.0537525
PC5953_c0_g1	394.967	-0.858241	0.297213	-2.88763	0.00388162	0.0537525
PC6057_c0_g1	6234.39	-0.490365	0.169583	-2.89158	0.00383305	0.0537525
PC707_c0_g1	175.069	-0.945514	0.327218	-2.88955	0.00385791	0.0537525
PC71930_c0_g1	7.64562	2.21823	0.767238	2.89119	0.00383785	0.0537525
PC933_c0_g1	733.468	-1.33716	0.46216	-2.89328	0.00381244	0.0537525
PC9914_c0_g1	12.5853	-1.43402	0.496435	-2.88863	0.00386922	0.0537525
PC42578_c0_g2	6.68632	-1.86333	0.645438	-2.88692	0.00389029	0.0538135
PC201_c0_g1	749.424	-0.43	0.148973	-2.88643	0.00389645	0.0538324
PC2891_c0_g1	691.696	-0.749716	0.259779	-2.88597	0.00390207	0.0538324
PC3367_c0_g1	210.709	-0.73772	0.25564	-2.88578	0.00390446	0.0538324
PC2847_c0_g1	19978.9	-0.403024	0.139743	-2.88403	0.00392619	0.054073
PC20429_c0_g1	923.181	0.969448	0.336326	2.88246	0.00394583	0.0542132
PC2316_c4_g1	15.8652	-1.95929	0.679731	-2.88246	0.00394587	0.0542132
PC3912_c0_g1	28.7054	-0.86978	0.301778	-2.88219	0.00394927	0.0542132
PC3344_c0_g1	2641.04	0.529354	0.183725	2.88123	0.00396124	0.0542636
PC48559_c0_g1	67.5921	-0.954285	0.33121	-2.88121	0.00396154	0.0542636
PC11405_c0_g1	27.134	0.977463	0.339643	2.87791	0.0040032	0.0543014
PC11737_c0_g2	37.7738	-1.02996	0.357812	-2.8785	0.00399573	0.0543014
PC16344_c1_g1	1841.69	-0.69817	0.242451	-2.87963	0.00398143	0.0543014
PC24882_c0_g1	14.6114	-1.56073	0.542418	-2.87735	0.00401027	0.0543014
PC303_c0_g1	6477.27	-0.624389	0.216923	-2.87839	0.00399709	0.0543014
PC5508_c0_g1	181.463	-0.773381	0.268704	-2.8782	0.00399957	0.0543014
PC5526_c0_g1	809.681	0.780871	0.271202	2.8793	0.00398556	0.0543014
PC6326_c0_g1	394.5	-0.350133	0.121554	-2.88046	0.00397094	0.0543014
PC724_c0_g1	696.156	-0.402708	0.139864	-2.87928	0.00398582	0.0543014
PC8214_c0_g1	520.721	0.886396	0.308071	2.87724	0.00401165	0.0543014
PC8223_c0_g2	37.1001	0.698631	0.242789	2.87752	0.00400813	0.0543014
PC23007_c0_g1	33.6461	2.45723	0.85434	2.87618	0.00402524	0.0543105
PC27135_c0_g1	5369.25	-0.395686	0.13757	-2.87624	0.00402444	0.0543105
PC79_c0_g2	304.468	0.721797	0.250905	2.87677	0.00401763	0.0543105
PC4357_c0_g1	2655.34	-0.739915	0.257311	-2.87557	0.00403301	0.0543273
PC784_c0_g1	332.013	0.598597	0.208178	2.87541	0.00403509	0.0543273
PC3156_c0_g1	1409.35	0.964041	0.335515	2.87331	0.00406189	0.0545717
PC7342_c0_g2	142.561	0.528388	0.183885	2.87348	0.00405983	0.0545717
PC12155_c0_g1	1926.77	-0.804507	0.280087	-2.87235	0.00407428	0.0546218
PC3650_c0_g1	351.136	-0.324609	0.113008	-2.87243	0.00407326	0.0546218
PC27307_c0_g1	137.939	0.693482	0.24161	2.87025	0.00410145	0.0546954
PC31071_c0_g1	9.05087	-2.41639	0.841821	-2.87043	0.00409913	0.0546954
PC4646_c0_g1	289.109	0.799499	0.278539	2.87033	0.00410048	0.0546954
PC5909_c0_g6	613.369	-0.761528	0.2652	-2.87153	0.00408493	0.0546954
PC6742_c0_g1	776.652	-0.369833	0.128813	-2.87108	0.00409069	0.0546954
PC11450_c0_g2	11.0138	1.52958	0.532997	2.86978	0.00410761	0.0547197
PC9285_c0_g1	69.0628	0.744587	0.259544	2.86882	0.00412001	0.054827
PC27708_c0_g1	64.5334	-1.12743	0.39305	-2.86843	0.00412519	0.0548381
PC3082_c0_g1	797.309	1.1377	0.396831	2.86697	0.00414424	0.0549754
PC42147_c0_g1	19.1151	1.30227	0.454229	2.867	0.00414382	0.0549754
PC10707_c0_g2	9.99444	1.65957	0.579199	2.86528	0.00416642	0.0551537
PC9084_c0_g1	261.866	1.76309	0.615284	2.86549	0.00416368	0.0551537
PC10733_c0_g1	28.8383	-1.14292	0.399065	-2.86399	0.00418342	0.0552075
PC5252_c1_g1	9.77139	-1.85659	0.648172	-2.86434	0.00417876	0.0552075
PC9014_c0_g1	889.484	-0.792704	0.276785	-2.86397	0.00418362	0.0552075
PC7783_c0_g1	6289.96	-1.43268	0.500321	-2.86353	0.00418944	0.0552266
PC2332_c0_g1	221.983	-0.390172	0.136295	-2.8627	0.00420047	0.0553143
PC105264_c0_g1	1831	0.60304	0.210736	2.86159	0.00421518	0.0554052
PC3112_c0_g1	305.337	-1.74334	0.609235	-2.86152	0.00421616	0.0554052
PC12101_c1_g1	19.9287	-0.925176	0.323596	-2.85905	0.00424914	0.0554376
PC1395_c0_g2	459.528	0.611971	0.214045	2.85907	0.00424881	0.0554376
PC1833_c0_g1	1214.01	-0.254126	0.0888743	-2.85939	0.0042446	0.0554376
PC20098_c0_g1	972.99	-0.827468	0.289294	-2.8603	0.00423237	0.0554376
PC25992_c1_g1	25.6746	0.923404	0.322973	2.85908	0.00424878	0.0554376
PC4127_c0_g1	458.993	0.591228	0.206663	2.86083	0.00422532	0.0554376
PC5655_c0_g1	17609.3	-1.15793	0.405006	-2.85903	0.00424939	0.0554376
PC88152_c0_g1	372.799	0.992851	0.347366	2.85823	0.00426014	0.0554632
PC9491_c1_g1	40.4682	1.01281	0.354335	2.85834	0.0042587	0.0554632
PC1456_c0_g1	1070.21	0.674686	0.236161	2.85689	0.00427818	0.0556155
PC15257_c0_g1	687.119	-1.19023	0.416671	-2.85652	0.00428317	0.0556155
PC15856_c0_g2	84.1955	0.589984	0.206573	2.85605	0.00428948	0.0556155
PC3846_c0_g2	32.9717	0.8477	0.296798	2.85615	0.00428815	0.0556155
PC7248_c0_g2	148.674	-0.796892	0.27909	-2.85532	0.0042993	0.0556856
PC11726_c0_g1	3138.94	-0.555992	0.194872	-2.85311	0.00432932	0.0558134
PC16974_c0_g1	369.085	0.526738	0.184662	2.85244	0.00433844	0.0558134
PC20570_c0_g1	156.946	0.801828	0.280959	2.8539	0.00431863	0.0558134
PC283_c0_g1	1118.84	-0.374327	0.131222	-2.85263	0.00433587	0.0558134
PC2899_c1_g2	4780.15	-0.632745	0.22186	-2.852	0.00434456	0.0558134
PC301_c0_g2	4963.46	-0.376583	0.132034	-2.85217	0.00434221	0.0558134
PC4882_c0_g1	136.19	-1.08566	0.380475	-2.85344	0.0043248	0.0558134
PC48878_c0_g1	11.2822	-1.46065	0.511791	-2.854	0.00431727	0.0558134
PC1328_c4_g2	27.4814	-0.726428	0.254767	-2.85134	0.00435351	0.0558716
PC46069_c0_g2	9.93527	-1.42098	0.498516	-2.85042	0.00436619	0.0559774
PC26585_c0_g1	23.7992	1.2095	0.424404	2.84988	0.00437353	0.0559884
PC9810_c0_g1	77.135	-0.582911	0.204551	-2.84971	0.00437593	0.0559884
PC16727_c0_g2	24.583	-0.718633	0.252237	-2.84904	0.00438519	0.05605
PC18136_c0_g2	31.041	-0.946841	0.33241	-2.84841	0.00439379	0.0561031
PC46120_c0_g1	244.288	-1.66015	0.583079	-2.84721	0.00441042	0.0562585
PC1459_c0_g1	570.003	0.595629	0.209253	2.84645	0.00442101	0.0563136
PC3039_c1_g2	145.437	0.884041	0.310598	2.84626	0.00442367	0.0563136
PC1511_c1_g2	221.02	0.694826	0.244177	2.84558	0.0044331	0.05632
PC1606_c0_g1	312.526	0.479485	0.168484	2.84588	0.00442885	0.05632
PC18544_c0_g1	54.4366	1.22241	0.429633	2.84524	0.00443783	0.0563234
PC15062_c0_g1	159.234	0.662339	0.232857	2.8444	0.00444953	0.0564151
PC17601_c0_g1	1361.24	-0.487849	0.171618	-2.84264	0.00447419	0.0565572
PC3442_c0_g1	187.293	0.86398	0.303899	2.84298	0.00446939	0.0565572
PC4369_c0_g1	88.8682	0.717045	0.252219	2.84295	0.00446986	0.0565572
PC5320_c0_g4	8904.98	0.77665	0.273388	2.84084	0.00449955	0.0568208
PC13130_c0_g2	82.5435	-1.85661	0.653999	-2.83885	0.00452758	0.0571176
PC17700_c0_g1	15735.6	-0.358114	0.126254	-2.83646	0.00456165	0.05749
PC6489_c1_g1	103.641	0.524155	0.184828	2.8359	0.00456965	0.0575333
PC2278_c0_g2	497.693	-0.525618	0.185405	-2.83497	0.00458299	0.0576438
PC247_c8_g1	94.9954	0.508517	0.179478	2.83331	0.00460692	0.057887
PC18982_c0_g1	219.667	-1.30302	0.460221	-2.83129	0.00463603	0.0581948
PC1321_c1_g1	307.581	-0.430252	0.152068	-2.82934	0.0046644	0.058342
PC14755_c0_g1	57.3145	0.627568	0.221812	2.82927	0.00466536	0.058342
PC20289_c0_g2	53.2126	-0.757154	0.26762	-2.82921	0.00466625	0.058342
PC7291_c0_g1	1111.13	-1.4412	0.509276	-2.82991	0.00465616	0.058342
PC1343_c0_g1	364.224	-0.465512	0.16459	-2.82831	0.0046795	0.0584498
PC2432_c0_g2	405.86	0.691334	0.24462	2.82616	0.00471104	0.0587854
PC2055_c0_g1	2733.32	-0.408866	0.14471	-2.82543	0.00472178	0.0588613
PC3653_c0_g1	34.5168	1.06571	0.377246	2.82496	0.00472858	0.0588879
PC2127_c0_g1	90.8183	-1.01172	0.358203	-2.82443	0.00473648	0.0589281
PC13337_c0_g1	58.6423	0.651136	0.230574	2.82398	0.00474312	0.0589525
PC20984_c0_g1	247.364	-0.403287	0.142828	-2.82358	0.00474904	0.058968
PC10902_c0_g1	12.9033	1.09635	0.388416	2.82263	0.0047632	0.0590857
PC22096_c6_g2	21.4034	-1.79374	0.635598	-2.82213	0.00477057	0.059119
PC11261_c0_g1	1247.77	-0.372655	0.132094	-2.82114	0.00478536	0.059244
PC26938_c0_g1	162.803	-1.12171	0.397682	-2.82062	0.0047931	0.0592817
PC1992_c0_g1	11931.7	-1.40581	0.498566	-2.81971	0.00480671	0.0593337
PC33894_c0_g1	8.32633	1.90977	0.677228	2.81997	0.00480276	0.0593337
PC1963_c0_g1	3038.73	-0.810958	0.287784	-2.81794	0.00483328	0.0596034
PC10373_c0_g3	17.0273	1.058	0.375525	2.81739	0.00484163	0.059648
PC2242_c1_g1	22.3219	1.46079	0.518562	2.81699	0.00484754	0.0596626
PC20546_c0_g1	11.4903	-1.43954	0.511155	-2.81625	0.00485873	0.0596839
PC3918_c0_g2	133.242	-0.748703	0.265847	-2.8163	0.00485804	0.0596839
PC7695_c1_g2	9.00395	1.32868	0.472011	2.81493	0.00487882	0.0598724
PC5601_c0_g1	114.056	-0.586404	0.208408	-2.81373	0.00489703	0.0600374
PC9930_c0_g1	4566.51	-0.474977	0.16883	-2.81334	0.00490301	0.0600524
PC116073_c0_g1	9.78086	1.73559	0.617257	2.81177	0.0049269	0.0600534
PC2149_c1_g1	19.8515	1.01146	0.359711	2.81187	0.00492548	0.0600534
PC5471_c0_g2	1299.54	-1.05408	0.374758	-2.81269	0.00491284	0.0600534
PC6215_c0_g1	946.527	0.879861	0.312907	2.81189	0.00492507	0.0600534
PC8958_c0_g1	249.325	-0.387652	0.137823	-2.81269	0.0049129	0.0600534
PC1006_c0_g1	384.903	0.525409	0.186995	2.80974	0.0049581	0.0602071
PC1179_c0_g1	883.132	0.314817	0.112046	2.80971	0.0049586	0.0602071
PC12686_c0_g1	559.901	-0.553848	0.1971	-2.80999	0.00495434	0.0602071
PC13893_c0_g1	1520.32	-0.518691	0.184553	-2.81052	0.00494609	0.0602071
PC71413_c0_g1	19.1523	-1.81192	0.644986	-2.80923	0.00496595	0.0602384
PC1701_c0_g1	84.1603	-0.597437	0.212783	-2.80773	0.00498928	0.0604632
PC108960_c0_g1	10.8332	-3.16265	1.12661	-2.80722	0.00499712	0.0604687
PC11408_c0_g1	77.0972	0.863899	0.307823	2.80648	0.00500862	0.0604687
PC12041_c0_g1	30.0317	-1.24343	0.443159	-2.80584	0.00501849	0.0604687
PC19488_c0_g1	206.109	1.2575	0.44814	2.80605	0.00501526	0.0604687
PC30596_c0_g1	102.389	-1.05334	0.375391	-2.80598	0.00501633	0.0604687
PC7016_c1_g1	29.4608	0.788566	0.281009	2.8062	0.00501303	0.0604687
PC13914_c0_g1	77.5899	1.11178	0.396343	2.80508	0.00503037	0.0604813
PC26336_c0_g1	27.8461	0.899922	0.320914	2.80424	0.0050435	0.0604813
PC3476_c0_g1	3294.59	-1.52846	0.544949	-2.80478	0.00503506	0.0604813
PC8201_c0_g1	179.868	-0.613818	0.218819	-2.80514	0.00502954	0.0604813
PC9121_c2_g2	31.2028	1.63732	0.583834	2.80443	0.00504063	0.0604813
PC9290_c1_g1	2405.21	0.809709	0.288779	2.8039	0.00504881	0.0604874
PC4571_c0_g1	2848.94	-0.469033	0.167424	-2.80146	0.00508717	0.0608636
PC7653_c0_g1	3188.96	-0.898671	0.320806	-2.80129	0.00508986	0.0608636
PC2214_c0_g1	1426.81	-0.454011	0.162096	-2.80087	0.00509656	0.060886
PC1717_c0_g1	208.985	0.882281	0.31519	2.79921	0.00512281	0.0610263
PC5147_c0_g1	1545.75	0.813486	0.290601	2.79933	0.0051209	0.0610263
PC8693_c0_g1	33.2695	1.17907	0.421208	2.79925	0.00512216	0.0610263
PC3188_c0_g1	511.923	0.527204	0.188368	2.7988	0.00512934	0.0610464
PC11837_c0_g1	295.142	-0.946377	0.338282	-2.7976	0.00514845	0.0612161
PC5239_c0_g2	366.853	0.385663	0.137916	2.79635	0.00516826	0.0613938
PC15538_c0_g1	324.909	-0.838061	0.299759	-2.79578	0.00517742	0.0614448
PC129904_c0_g1	5.53044	-1.60938	0.575727	-2.79539	0.00518372	0.0614617
PC2268_c0_g1	95.1513	0.74027	0.264929	2.79422	0.00520244	0.0616258
PC17582_c0_g1	42.1983	-0.94353	0.337719	-2.79383	0.00520878	0.0616429
PC58640_c0_g1	13.5259	1.29664	0.464207	2.79324	0.00521831	0.0616978
PC2003_c0_g1	494.888	0.823079	0.294738	2.79258	0.00522894	0.0617584
PC65_c0_g3	371.715	-0.986924	0.353481	-2.79201	0.00523812	0.0617584
PC8442_c0_g1	14.2868	0.988194	0.353934	2.79203	0.00523785	0.0617584
PC20027_c0_g1	449.872	1.06391	0.38111	2.7916	0.00524482	0.0617797
PC1143_c0_g1	147.566	-0.381577	0.136725	-2.79084	0.0052572	0.0618593
PC14597_c0_g1	14.7155	0.96169	0.34462	2.79058	0.00526138	0.0618593
PC32096_c0_g1	87.7049	0.520452	0.186527	2.79022	0.00526728	0.0618709
PC1578_c0_g1	72.9825	-0.988913	0.354504	-2.78957	0.00527781	0.0619369
PC37711_c0_g1	1427.46	-0.289694	0.103877	-2.78881	0.00529014	0.0620097
PC6568_c0_g1	997.544	-1.2367	0.443485	-2.78859	0.00529384	0.0620097
PC28089_c0_g1	835.134	0.666548	0.239067	2.78813	0.0053014	0.0620406
PC11138_c0_g2	44.4935	0.68754	0.24686	2.78515	0.00535038	0.0621465
PC14592_c0_g1	15.9443	0.860386	0.30897	2.78469	0.00535789	0.0621465
PC18182_c0_g2	11.9385	1.28198	0.460093	2.78636	0.00533039	0.0621465
PC25402_c1_g1	20.8118	1.26156	0.453015	2.78482	0.00535582	0.0621465
PC269_c0_g1	261.029	0.27603	0.0990932	2.78556	0.00534345	0.0621465
PC2784_c0_g1	6963.02	-0.34921	0.125409	-2.78458	0.00535971	0.0621465
PC27850_c2_g2	8.70061	1.33105	0.477708	2.78632	0.00533095	0.0621465
PC4573_c0_g1	183.405	-0.435412	0.156275	-2.78619	0.0053332	0.0621465
PC5688_c0_g1	1465.02	-0.410797	0.147502	-2.78502	0.00535252	0.0621465
PC6449_c0_g1	103.551	0.615194	0.220867	2.78537	0.00534675	0.0621465
PC104937_c0_g1	1018.77	-0.902273	0.324111	-2.78384	0.00537199	0.0622197
PC4403_c0_g1	3193.55	-1.18272	0.424887	-2.7836	0.00537589	0.0622197
PC11674_c0_g1	63.9597	0.942803	0.338798	2.78279	0.00538936	0.0623085
PC17325_c2_g1	9.31768	-1.16256	0.417806	-2.78255	0.00539343	0.0623085
PC12782_c0_g1	2386.97	-0.71521	0.257102	-2.78182	0.00540551	0.0623339
PC13091_c0_g1	58.2282	0.765943	0.275334	2.78187	0.00540474	0.0623339
PC1726_c2_g1	86.7428	0.538509	0.193738	2.77957	0.00544305	0.0625233
PC18303_c0_g4	11.0335	1.05649	0.379998	2.78026	0.00543146	0.0625233
PC22573_c1_g1	12.2282	1.32104	0.475325	2.77925	0.00544853	0.0625233
PC6762_c0_g1	75.1411	0.733239	0.263792	2.77961	0.00544238	0.0625233
PC70_c0_g1	757.623	-0.319857	0.115062	-2.77986	0.00543821	0.0625233
PC7433_c0_g1	328.165	-0.848578	0.30538	-2.77876	0.00545664	0.0625233
PC94561_c0_g1	335.264	-1.25765	0.452584	-2.77882	0.00545572	0.0625233
PC13184_c0_g1	142.157	-0.761209	0.274049	-2.77764	0.00547553	0.0625353
PC21712_c0_g1	19.1481	-1.13189	0.40755	-2.77731	0.00548116	0.0625353
PC43846_c0_g1	12.1739	1.92042	0.691215	2.77833	0.00546391	0.0625353
PC47858_c0_g1	31.2763	0.914671	0.329377	2.77697	0.00548682	0.0625353
PC7242_c0_g1	257.692	-0.479223	0.172571	-2.77695	0.0054871	0.0625353
PC8070_c0_g2	5897.39	0.676356	0.243562	2.77693	0.00548742	0.0625353
PC121746_c0_g1	589.057	0.811622	0.292382	2.7759	0.00550492	0.062599
PC1985_c0_g1	7.64836	-1.40576	0.506501	-2.77543	0.00551286	0.062599
PC3311_c0_g1	1276.29	0.779648	0.280843	2.7761	0.00550159	0.062599
PC74377_c0_g1	223.172	-0.533532	0.192231	-2.77548	0.00551209	0.062599
PC13413_c0_g1	42.2174	-1.23196	0.444086	-2.77415	0.00553462	0.0627896
PC10267_c1_g1	2453.26	-0.481634	0.173666	-2.77333	0.00554858	0.0627955
PC17317_c0_g1	52.6454	-0.991081	0.357627	-2.77127	0.00558374	0.0627955
PC19_c0_g1	8789.7	0.526944	0.190058	2.77254	0.00556211	0.0627955
PC20273_c0_g1	809.23	0.443244	0.159888	2.77221	0.00556768	0.0627955
PC21475_c0_g2	12370.6	-0.500129	0.180467	-2.7713	0.00558322	0.0627955
PC32026_c0_g2	12.4255	1.20134	0.433447	2.7716	0.00557814	0.0627955
PC5896_c0_g1	300.821	0.459575	0.165689	2.77372	0.00554198	0.0627955
PC6117_c0_g1	2279.69	-0.789737	0.28498	-2.77121	0.00558492	0.0627955
PC8006_c0_g1	1265.5	-0.453395	0.163528	-2.77258	0.00556142	0.0627955
PC9121_c4_g1	129.845	1.31421	0.474085	2.7721	0.00556953	0.0627955
PC3302_c0_g2	56.2723	0.654906	0.236356	2.77084	0.00559116	0.0628096
PC8204_c0_g1	85.532	1.58491	0.572285	2.76943	0.00561538	0.0630256
PC3429_c0_g2	388.802	-0.566557	0.20461	-2.76896	0.00562353	0.063061
PC5125_c0_g1	774.498	-1.06142	0.383433	-2.76821	0.00563646	0.0631498
PC2426_c0_g1	53.7572	0.823533	0.297722	2.76611	0.00567288	0.0633403
PC276_c0_g1	731.29	0.577482	0.208819	2.76547	0.00568401	0.0633403
PC4172_c1_g1	39.8932	1.14913	0.415384	2.76642	0.00566747	0.0633403
PC4393_c0_g1	376.51	0.686344	0.248207	2.76521	0.0056886	0.0633403
PC6128_c0_g1	91.136	0.742773	0.268606	2.76529	0.0056872	0.0633403
PC6671_c1_g1	2993.25	-1.02081	0.36916	-2.76521	0.00568855	0.0633403
PC695_c0_g1	3032.31	-0.635496	0.22975	-2.76603	0.00567439	0.0633403
PC616_c3_g1	29.1167	0.872351	0.315508	2.76491	0.00569389	0.0633433
PC25341_c2_g1	13.8957	-1.83316	0.66338	-2.76337	0.00572082	0.0635868
PC2819_c0_g1	181.965	-1.20911	0.437668	-2.76261	0.00573411	0.0636224
PC3705_c0_g1	1655.99	-1.84332	0.6672	-2.76277	0.0057314	0.0636224
PC13661_c0_g1	538.75	-0.569288	0.206234	-2.7604	0.00577304	0.0636624
PC13762_c0_g2	19.1721	1.15701	0.419143	2.76041	0.00577293	0.0636624
PC15967_c0_g1	115.698	0.692459	0.250791	2.7611	0.00576066	0.0636624
PC19919_c0_g1	18.3291	-1.7537	0.635198	-2.76087	0.0057647	0.0636624
PC2687_c0_g1	305.063	-1.26	0.456308	-2.76129	0.00575742	0.0636624
PC4072_c0_g1	93.6616	1.21881	0.441284	2.76196	0.00574547	0.0636624
PC4833_c0_g2	53.6522	2.96359	1.07359	2.76046	0.00577209	0.0636624
PC2179_c0_g1	325.856	0.332957	0.120643	2.75986	0.00578253	0.0636887
PC7604_c0_g1	261.429	-0.32629	0.118234	-2.7597	0.00578552	0.0636887
PC160_c2_g1	15.9238	1.0967	0.397593	2.75835	0.00580942	0.0636917
PC28958_c0_g1	18.9884	-1.33348	0.483458	-2.75821	0.00581195	0.0636917
PC38063_c0_g2	8.66542	1.06833	0.387359	2.75797	0.00581609	0.0636917
PC462_c0_g1	523.537	-0.807921	0.292859	-2.75874	0.00580248	0.0636917
PC544_c0_g1	543.739	-0.515758	0.186955	-2.75872	0.00580279	0.0636917
PC8770_c0_g1	333.12	0.597842	0.216703	2.75881	0.00580126	0.0636917
PC6218_c2_g1	45.5403	-1.32823	0.481776	-2.75695	0.0058344	0.0638368
PC36281_c0_g1	13.7604	-1.31689	0.477762	-2.75638	0.00584457	0.0638927
PC10690_c0_g1	215.409	0.803306	0.291669	2.75417	0.00588407	0.0639052
PC1181_c0_g1	848.298	0.390152	0.141664	2.75407	0.00588586	0.0639052
PC15359_c0_g1	28.7701	-0.708446	0.257308	-2.7533	0.00589984	0.0639052
PC1647_c2_g1	1901.82	-0.701711	0.25478	-2.75418	0.00588391	0.0639052
PC19269_c0_g1	340.547	0.863437	0.313667	2.75272	0.00591028	0.0639052
PC2471_c1_g1	931.74	-0.886002	0.321905	-2.75237	0.00591664	0.0639052
PC25676_c1_g3	6.76049	-2.12098	0.77034	-2.7533	0.00589979	0.0639052
PC381_c2_g1	71.5737	-1.2317	0.447065	-2.75509	0.00586763	0.0639052
PC4146_c0_g2	129.178	0.351301	0.127517	2.75494	0.00587024	0.0639052
PC49990_c0_g1	7.50915	1.32384	0.480458	2.75537	0.00586249	0.0639052
PC6987_c0_g1	14.1831	-0.876542	0.318403	-2.75294	0.00590635	0.0639052
PC7104_c0_g1	18.0396	0.971286	0.352463	2.75571	0.00585652	0.0639052
PC9155_c0_g1	831.002	-1.57157	0.570817	-2.75319	0.0059018	0.0639052
PC9245_c0_g1	585.855	-1.66246	0.60399	-2.75247	0.00591484	0.0639052
PC5162_c0_g2	1768.23	-0.292015	0.10611	-2.75201	0.00592306	0.0639199
PC11476_c0_g1	1707.18	0.723592	0.263329	2.74786	0.00599855	0.0639985
PC11546_c0_g1	1230.09	-0.282377	0.102651	-2.75085	0.00594412	0.0639985
PC12440_c0_g1	362.045	-1.20193	0.437148	-2.74947	0.00596913	0.0639985
PC12979_c0_g1	469.661	-0.5892	0.214277	-2.74971	0.00596483	0.0639985
PC13846_c0_g1	623.696	0.919685	0.334483	2.74958	0.00596725	0.0639985
PC15503_c0_g1	10.7379	1.31645	0.478673	2.75022	0.00595554	0.0639985
PC242_c0_g1	3566.25	-0.488428	0.17753	-2.75125	0.00593686	0.0639985
PC444_c0_g1	8235.7	-1.11836	0.406945	-2.74819	0.0059925	0.0639985
PC4999_c0_g1	35.2308	0.759546	0.276324	2.74875	0.00598236	0.0639985
PC5199_c0_g1	730.916	-0.382956	0.13931	-2.74896	0.0059785	0.0639985
PC596_c0_g2	56.0509	0.643732	0.234163	2.74908	0.00597629	0.0639985
PC6860_c0_g1	2814.93	-0.532086	0.193521	-2.7495	0.00596856	0.0639985
PC7790_c0_g1	271.07	-0.683817	0.248801	-2.74845	0.00598782	0.0639985
PC7944_c0_g1	192.526	-0.994213	0.361834	-2.74771	0.00600137	0.0639985
PC10765_c0_g1	128.216	0.870148	0.316737	2.74723	0.00601015	0.064038
PC14899_c0_g1	44.1088	0.660247	0.240387	2.7466	0.00602157	0.0640516
PC805_c0_g1	1795.26	0.901842	0.328324	2.74681	0.00601783	0.0640516
PC1009_c1_g1	8.98968	1.34532	0.489957	2.74578	0.00603666	0.0641579
PC7163_c0_g1	51.8479	-0.613957	0.223634	-2.74537	0.00604427	0.0641847
PC40186_c0_g1	24.4077	1.02258	0.372577	2.74461	0.00605825	0.0642791
PC13022_c1_g2	77.9618	0.902717	0.329002	2.74381	0.00607311	0.0643286
PC17820_c0_g2	18.2996	-1.14289	0.416518	-2.74392	0.00607108	0.0643286
PC1053_c1_g2	2264.83	-0.325766	0.118749	-2.74332	0.00608207	0.0643694
PC14986_c0_g2	894.248	-0.719006	0.262156	-2.74266	0.00609429	0.0644447
PC1008_c0_g1	100.309	0.754115	0.274995	2.74229	0.00610131	0.0644649
PC27476_c0_g1	1080.73	0.484181	0.176611	2.74151	0.0061158	0.0645311
PC5009_c1_g1	1456.15	-0.68826	0.251062	-2.7414	0.00611781	0.0645311
PC12823_c0_g1	34.7789	-1.99366	0.727391	-2.74084	0.00612819	0.0645417
PC36028_c0_g4	11.4327	-1.45649	0.531411	-2.7408	0.00612904	0.0645417
PC7428_c2_g1	474.993	0.736666	0.268846	2.74011	0.00614191	0.0646232
PC23486_c1_g1	7.94963	-1.78161	0.650272	-2.73979	0.00614793	0.0646327
PC11287_c0_g1	110.792	0.574499	0.209737	2.73914	0.00616004	0.064706
PC26584_c0_g1	17.8738	0.801954	0.292819	2.73873	0.00616764	0.064732
PC12046_c0_g1	17.2088	0.971765	0.355091	2.73666	0.00620664	0.0648177
PC18079_c0_g1	9.35149	1.49138	0.544863	2.73716	0.00619726	0.0648177
PC2084_c0_g1	395.261	-0.954499	0.348617	-2.73796	0.00618216	0.0648177
PC2367_c0_g1	2264.82	0.643303	0.235048	2.7369	0.00620202	0.0648177
PC61_c0_g4	295.694	-0.52812	0.192922	-2.73747	0.0061913	0.0648177
PC6455_c0_g1	739.608	-0.374225	0.136743	-2.7367	0.00620588	0.0648177
PC51849_c1_g1	16.2833	1.08041	0.394848	2.73626	0.00621413	0.0648423
PC46129_c0_g1	63.5942	0.884449	0.32332	2.73552	0.00622818	0.0649352
PC11297_c0_g1	1019.33	-0.509411	0.186281	-2.73464	0.00624494	0.0650135
PC4151_c0_g1	560.352	-1.55607	0.569036	-2.73458	0.006246	0.0650135
PC1333_c0_g1	931.054	0.57325	0.209695	2.73374	0.00626195	0.0650722
PC9751_c0_g1	169.725	1.35685	0.496326	2.73378	0.00626112	0.0650722
PC107290_c0_g1	142.333	3.49138	1.27819	2.73151	0.00630452	0.0654068
PC7761_c0_g1	7285.23	-0.392109	0.143545	-2.73161	0.00630259	0.0654068
PC7165_c0_g3	22.8268	1.03094	0.377546	2.73063	0.00632129	0.0654793
PC8147_c0_g1	38.1333	0.958236	0.350925	2.7306	0.00632189	0.0654793
PC12959_c0_g1	511.879	-0.393328	0.144104	-2.72947	0.00634369	0.0656433
PC3669_c0_g1	128.564	0.999865	0.366354	2.72924	0.00634813	0.0656433
PC26586_c0_g1	9.16097	1.56566	0.573749	2.72881	0.00635624	0.0656733
PC24718_c0_g1	9.10056	1.33345	0.489014	2.72681	0.00639504	0.0660202
PC10946_c0_g1	22.9627	0.860053	0.315455	2.72639	0.00640308	0.0660233
PC1121_c0_g1	377.547	0.398036	0.146043	2.72546	0.00642114	0.0660233
PC1652_c0_g1	931.728	-1.01716	0.373183	-2.72564	0.00641764	0.0660233
PC22681_c0_g1	15.5651	0.909771	0.333749	2.72592	0.0064123	0.0660233
PC23038_c0_g1	37.8471	1.05572	0.387356	2.72544	0.00642151	0.0660233
PC83281_c0_g1	9.5367	2.18002	0.800003	2.72502	0.00642971	0.0660538
PC1074_c0_g1	37056.2	0.715599	0.262767	2.72332	0.00646289	0.0660715
PC11414_c0_g1	59.2262	-0.981314	0.360372	-2.72306	0.0064681	0.0660715
PC45624_c0_g1	46.5182	1.01532	0.372826	2.7233	0.00646325	0.0660715
PC663_c2_g1	6.44276	1.89474	0.695674	2.7236	0.00645749	0.0660715
PC73909_c0_g1	144.648	-0.42042	0.154374	-2.72338	0.00646186	0.0660715
PC84556_c0_g1	5.99032	-1.48198	0.544153	-2.72346	0.00646013	0.0660715
PC992_c0_g1	4778.14	-0.740575	0.271901	-2.72369	0.00645577	0.0660715
PC30439_c2_g1	73.1974	0.554923	0.203836	2.7224	0.00648096	0.0661493
PC1229_c1_g1	120.022	0.719439	0.264333	2.72171	0.00649448	0.0662065
PC28969_c0_g1	14.9585	-1.14376	0.420257	-2.72158	0.00649706	0.0662065
PC14853_c0_g1	328.15	0.606772	0.223065	2.72016	0.0065251	0.0662248
PC1731_c0_g1	1696.41	0.435492	0.160086	2.72036	0.00652106	0.0662248
PC2006_c0_g1	1482.24	0.880566	0.323716	2.72018	0.00652471	0.0662248
PC2147_c0_g1	55.9719	-0.71987	0.264608	-2.72052	0.00651797	0.0662248
PC3100_c0_g5	13.3617	0.897924	0.33007	2.72041	0.00652015	0.0662248
PC1044_c0_g2	230.891	-0.480669	0.176777	-2.71907	0.00654652	0.0663676
PC98270_c0_g1	4449.84	-0.33079	0.121663	-2.71891	0.00654969	0.0663676
PC6394_c0_g1	189.272	-0.840903	0.309344	-2.71834	0.006561	0.0664288
PC19608_c0_g2	567.676	-0.569297	0.209511	-2.71726	0.00658241	0.0664313
PC20193_c1_g3	514.12	0.533886	0.196468	2.71741	0.00657943	0.0664313
PC2743_c0_g1	725.939	0.687013	0.252848	2.7171	0.00658563	0.0664313
PC511_c5_g1	103.982	-0.516703	0.190182	-2.71688	0.00659002	0.0664313
PC5319_c0_g1	349.309	-0.513798	0.189104	-2.71702	0.00658727	0.0664313
PC925_c1_g1	110.679	-0.911762	0.335609	-2.71674	0.00659284	0.0664313
PC14281_c0_g4	39.003	-0.80039	0.2947	-2.71595	0.00660856	0.0665365
PC243_c0_g2	4252.52	-0.275397	0.101442	-2.71484	0.00663086	0.0665486
PC26388_c0_g2	16.8261	0.961587	0.354184	2.71494	0.00662882	0.0665486
PC6026_c0_g1	28.8588	-0.652049	0.240162	-2.71504	0.00662673	0.0665486
PC62111_c0_g1	7.18121	-1.72416	0.634942	-2.71547	0.00661823	0.0665486
PC2185_c0_g1	189.177	0.348032	0.128225	2.71422	0.00664325	0.0666199
PC12419_c0_g1	568.269	0.913919	0.336861	2.71305	0.00666678	0.06679
PC7904_c0_g1	480.502	0.656658	0.242055	2.71285	0.0066708	0.06679
PC3183_c0_g1	743.232	0.587385	0.216637	2.71138	0.00670038	0.0669269
PC32311_c0_g2	11.8685	1.15145	0.424659	2.71148	0.00669842	0.0669269
PC5371_c0_g1	27.898	0.780907	0.287988	2.71159	0.00669604	0.0669269
PC4289_c1_g1	18.213	0.865624	0.319438	2.70983	0.00673171	0.0671866
PC8652_c0_g1	9.79063	2.07817	0.767209	2.70874	0.00675395	0.0673553
PC13450_c0_g1	16.3944	1.6317	0.602686	2.70738	0.00678176	0.0675413
PC22863_c0_g1	106.032	0.945993	0.349423	2.7073	0.00678331	0.0675413
PC5540_c0_g1	685.077	-1.32509	0.489586	-2.70654	0.00679882	0.0676424
PC1390_c3_g1	338.657	-1.13881	0.420825	-2.70613	0.00680719	0.0676723
PC16344_c0_g1	54.9234	0.675282	0.249682	2.70457	0.00683938	0.0679388
PC3088_c0_g1	159.433	-0.47521	0.175797	-2.70318	0.00686801	0.0681159
PC4522_c0_g2	1715.06	-0.517168	0.191305	-2.70336	0.00686415	0.0681159
PC11824_c0_g1	91.0413	0.559844	0.207276	2.70096	0.00691394	0.0681961
PC130842_c0_g1	211.272	-0.501669	0.185657	-2.70213	0.00688973	0.0681961
PC17616_c0_g1	87.4343	-0.938192	0.347266	-2.70165	0.00689953	0.0681961
PC18159_c0_g2	146.107	0.948933	0.351272	2.70142	0.00690436	0.0681961
PC6853_c0_g1	334.296	0.731489	0.270729	2.70192	0.00689406	0.0681961
PC7288_c0_g2	41.8476	-0.97464	0.360847	-2.70098	0.00691357	0.0681961
PC8548_c0_g1	47.9829	-0.932162	0.345015	-2.7018	0.0068965	0.0681961
PC21312_c1_g1	1019.55	-0.675991	0.250322	-2.70048	0.0069239	0.068241
PC128241_c0_g1	899.776	1.14515	0.424358	2.69854	0.00696436	0.0682863
PC13283_c0_g1	19.4165	-0.916151	0.339439	-2.69902	0.00695447	0.0682863
PC13802_c0_g1	3094.19	-0.49842	0.184626	-2.69963	0.0069417	0.0682863
PC19519_c0_g1	3001.4	1.00019	0.370478	2.69973	0.00693952	0.0682863
PC3040_c0_g1	142.773	0.790935	0.293108	2.69845	0.00696639	0.0682863
PC463_c0_g2	382.895	0.846135	0.313562	2.69846	0.00696611	0.0682863
PC9986_c0_g1	517.135	-0.976527	0.361837	-2.6988	0.00695895	0.0682863
PC17056_c0_g1	201.744	0.84463	0.313101	2.69763	0.00698359	0.0683487
PC208_c0_g1	2296.9	-0.473048	0.175351	-2.69772	0.00698163	0.0683487
PC17509_c0_g1	496.821	0.875711	0.324721	2.69681	0.0070007	0.068463
PC13715_c0_g1	46.1739	-0.885831	0.328582	-2.69592	0.00701938	0.0685558
PC43137_c0_g1	19.9645	1.63999	0.608341	2.69584	0.00702105	0.0685558
PC19992_c1_g1	8.68285	1.47298	0.546684	2.69438	0.00705194	0.0688042
PC2327_c3_g1	176.721	0.708545	0.262997	2.69412	0.00705746	0.0688048
PC1682_c0_g1	763.396	-0.461918	0.171483	-2.69366	0.00706717	0.0688463
PC10542_c0_g2	40.395	-0.874546	0.324775	-2.69278	0.00708597	0.0689761
PC275_c0_g1	436.376	-0.312075	0.115921	-2.69213	0.00709977	0.0690572
PC8195_c0_g1	638.864	-0.462687	0.171912	-2.69141	0.00711506	0.0691526
PC16508_c0_g1	3570.41	-0.501277	0.186533	-2.68734	0.00720232	0.0698392
PC1769_c2_g1	974.446	-0.792689	0.294947	-2.68757	0.00719749	0.0698392
PC68772_c0_g1	12.6397	-1.43516	0.534041	-2.68736	0.00720196	0.0698392
PC19778_c0_g1	19.613	0.911499	0.339264	2.68669	0.00721632	0.069882
PC262_c0_g2	470.401	-1.33917	0.49847	-2.68656	0.00721922	0.069882
PC27024_c0_g1	29.5965	1.24986	0.465438	2.68534	0.0072455	0.069882
PC3855_c0_g1	329.87	0.604369	0.225056	2.68542	0.00724382	0.069882
PC5204_c0_g1	685.902	0.743875	0.277006	2.68542	0.00724398	0.069882
PC5557_c0_g1	214.978	0.732278	0.272631	2.68597	0.00723191	0.069882
PC57815_c0_g1	2603.42	-0.412946	0.153729	-2.68619	0.00722724	0.069882
PC2046_c0_g1	431.436	-0.381592	0.142121	-2.68498	0.00725335	0.0699043
PC9384_c0_g1	581.869	-0.620196	0.231026	-2.68453	0.00726311	0.0699448
PC3125_c0_g1	25.6941	1.2493	0.465427	2.6842	0.00727035	0.0699612
PC1761_c0_g1	498.238	0.641041	0.23886	2.68375	0.00728009	0.0700015
PC1024_c0_g1	175.747	0.687113	0.256226	2.68166	0.00732575	0.0702169
PC150_c0_g1	982.504	0.43207	0.161178	2.68069	0.00734702	0.0702169
PC19145_c0_g1	46.5345	-1.41255	0.526635	-2.68221	0.00731371	0.0702169
PC20888_c1_g1	1428.48	0.441336	0.164549	2.68209	0.00731632	0.0702169
PC25399_c1_g2	10.4595	1.2815	0.47802	2.68084	0.00734371	0.0702169
PC28028_c0_g2	10.2469	-1.42319	0.530804	-2.6812	0.00733596	0.0702169
PC28473_c0_g1	321.656	-0.49712	0.185382	-2.68161	0.00732695	0.0702169
PC5353_c0_g1	514.193	0.349289	0.130282	2.68102	0.00733978	0.0702169
PC7171_c0_g1	865.872	0.483658	0.180462	2.68011	0.00735983	0.0702329
PC9770_c0_g2	105.964	-0.428658	0.159939	-2.68013	0.00735934	0.0702329
PC2489_c0_g2	3328.07	-0.46584	0.173845	-2.67963	0.00737031	0.0702798
PC26524_c0_g1	35.8161	0.773638	0.288806	2.67875	0.00738978	0.0704122
PC101_c1_g1	200.966	-0.505881	0.188937	-2.67752	0.00741705	0.0706187
PC2347_c5_g1	15.3058	1.57775	0.589368	2.67703	0.00742787	0.0706684
PC11296_c0_g1	4960.3	-0.484025	0.180825	-2.67675	0.00743392	0.0706727
PC16704_c0_g1	42.3451	0.57657	0.215472	2.67584	0.00745416	0.0708055
PC18_c0_g1	637.038	0.5066	0.189339	2.67562	0.00745912	0.0708055
PC328_c6_g1	274.524	-0.281305	0.105167	-2.67483	0.0074767	0.070919
PC11839_c0_g1	1356.63	0.912567	0.341252	2.67417	0.00749134	0.0710045
PC23857_c0_g1	1717	0.267358	0.0999926	2.67377	0.00750031	0.0710362
PC10596_c0_g1	41.1085	0.652532	0.244131	2.67288	0.00752039	0.0711729
PC11750_c0_g1	39.6368	0.611528	0.228853	2.67214	0.0075369	0.0712756
PC76_c2_g2	15.8924	0.906808	0.339474	2.67121	0.00755775	0.0714193
PC13772_c0_g1	1203.3	-0.66034	0.247332	-2.66986	0.00758839	0.0714271
PC24327_c1_g2	12.3815	-1.68451	0.630741	-2.67069	0.00756959	0.0714271
PC36678_c0_g1	156.248	0.787617	0.294947	2.67037	0.00757672	0.0714271
PC403_c3_g1	44.7219	0.986096	0.369363	2.66972	0.00759144	0.0714271
PC8_c1_g3	32.8558	1.1201	0.419564	2.66967	0.00759254	0.0714271
PC8891_c1_g1	208.853	0.416855	0.156112	2.67024	0.00757982	0.0714271
PC3714_c0_g1	611.674	0.925717	0.346819	2.66916	0.00760407	0.0714822
PC1370_c0_g1	209.551	0.34123	0.127857	2.66884	0.00761131	0.071497
PC27913_c2_g3	16.8143	1.04765	0.392643	2.66819	0.00762605	0.0715822
PC14687_c0_g1	66.6856	-0.59712	0.223925	-2.66661	0.00766201	0.0717126
PC25403_c0_g2	6.01973	1.54187	0.578132	2.667	0.00765325	0.0717126
PC4661_c2_g1	206.63	-0.349751	0.131161	-2.66658	0.00766268	0.0717126
PC6584_c2_g1	9.35757	1.39959	0.524758	2.66711	0.00765059	0.0717126
PC2910_c0_g5	29.3456	0.95066	0.356634	2.66564	0.00768415	0.0717894
PC346_c0_g1	27.1318	1.38811	0.520713	2.66578	0.00768091	0.0717894
PC4591_c0_g1	960.05	-0.893017	0.335031	-2.66547	0.00768797	0.0717894
PC10946_c1_g1	156.781	0.766049	0.287495	2.66456	0.00770894	0.071932
PC128_c3_g1	150.848	0.655785	0.246191	2.66372	0.00772816	0.0720581
PC21353_c0_g1	15.7648	1.1776	0.442132	2.66346	0.00773416	0.0720608
PC37435_c0_g1	11.7383	-1.41457	0.531242	-2.66277	0.00775011	0.0721561
PC4563_c2_g1	293.575	0.95855	0.36005	2.66227	0.00776162	0.07221
PC83896_c0_g1	7.78881	-1.79105	0.672928	-2.66158	0.00777748	0.0723042
PC20750_c1_g1	15.8135	-1.50196	0.564542	-2.66049	0.00780259	0.0724309
PC30620_c1_g1	22.2701	-1.51284	0.568603	-2.66062	0.00779959	0.0724309
PC19765_c0_g1	747.789	-0.530196	0.199319	-2.66004	0.00781322	0.0724762
PC54359_c0_g1	13.8106	-1.26803	0.476784	-2.65955	0.00782443	0.0725269
PC1531_c0_g1	3456.2	-0.599991	0.225646	-2.659	0.00783739	0.0725404
PC3758_c2_g1	15.1868	0.876382	0.32959	2.65901	0.0078371	0.0725404
PC105036_c0_g1	25.5466	-1.33083	0.500599	-2.65848	0.0078495	0.0725777
PC61970_c0_g1	16.637	-1.40811	0.529696	-2.65833	0.00785292	0.0725777
PC11363_c0_g1	63.6173	1.10628	0.416381	2.6569	0.00788639	0.0727048
PC13040_c0_g2	9.37011	1.06444	0.40069	2.65652	0.00789514	0.0727048
PC18945_c0_g1	105.03	1.25439	0.472184	2.65658	0.00789372	0.0727048
PC5910_c0_g1	498.826	-0.333411	0.125507	-2.65651	0.0078955	0.0727048
PC9326_c0_g2	23992.7	-0.836064	0.314618	-2.65739	0.00787473	0.0727048
PC1109_c5_g1	73.0324	0.926503	0.349493	2.65099	0.00802556	0.0728916
PC116268_c0_g1	980.531	-0.395428	0.149008	-2.65373	0.00796074	0.0728916
PC14467_c0_g1	255.53	0.668932	0.252286	2.65148	0.00801389	0.0728916
PC1460_c1_g1	858.293	0.953213	0.359339	2.65268	0.00798544	0.0728916
PC1682_c1_g1	1281.99	-0.589357	0.222299	-2.65119	0.00802087	0.0728916
PC23518_c1_g2	21.3211	0.860922	0.324687	2.65155	0.00801242	0.0728916
PC2352_c3_g1	512.653	0.749682	0.282718	2.65169	0.00800899	0.0728916
PC2419_c1_g1	554.141	-0.447405	0.168679	-2.65241	0.00799189	0.0728916
PC38275_c0_g1	114.086	4.15219	1.5655	2.6523	0.00799443	0.0728916
PC4066_c0_g1	579.777	-0.287834	0.108433	-2.65448	0.00794305	0.0728916
PC5607_c0_g1	685.326	-0.408357	0.153995	-2.65176	0.00800726	0.0728916
PC625_c0_g3	1047.64	0.860396	0.324405	2.65223	0.00799618	0.0728916
PC6260_c0_g1	354.503	-0.360753	0.136076	-2.6511	0.0080229	0.0728916
PC68904_c0_g1	9.7121	1.30883	0.493163	2.65396	0.0079554	0.0728916
PC77_c0_g1	1258.46	-0.44103	0.166326	-2.6516	0.00801105	0.0728916
PC83596_c0_g1	69.667	1.26943	0.478163	2.6548	0.00793549	0.0728916
PC839_c0_g1	9965.24	-0.686368	0.258646	-2.6537	0.00796146	0.0728916
PC8489_c0_g1	31.6399	0.866207	0.32654	2.65268	0.0079855	0.0728916
PC93678_c0_g1	289.296	0.464589	0.175059	2.6539	0.00795663	0.0728916
PC17604_c0_g1	14.8476	1.35818	0.512375	2.65074	0.00803146	0.0728927
PC1769_c7_g1	4416.45	-0.567476	0.214115	-2.65034	0.0080411	0.0729278
PC1868_c1_g1	474.332	0.416124	0.157069	2.6493	0.00806589	0.0730475
PC3458_c0_g1	734.956	0.315986	0.119262	2.64951	0.00806075	0.0730475
PC523_c0_g1	549.713	-0.375044	0.141625	-2.64816	0.00809316	0.0732419
PC10787_c0_g1	34.321	0.947235	0.357784	2.6475	0.00810888	0.0732791
PC27765_c0_g1	442.377	-1.01555	0.383576	-2.64758	0.00810711	0.0732791
PC4374_c0_g1	332.461	-1.3427	0.507221	-2.64718	0.00811665	0.0732967
PC11816_c0_g1	20.4443	1.1849	0.44781	2.64599	0.00814516	0.0733447
PC12305_c0_g1	569.202	-0.386723	0.146154	-2.64599	0.00814521	0.0733447
PC4831_c0_g3	12.0605	0.896919	0.338972	2.646	0.00814501	0.0733447
PC76_c0_g1	2494.01	0.970594	0.366742	2.64653	0.00813227	0.0733447
PC1674_c0_g1	206.028	-0.475051	0.179565	-2.64557	0.00815537	0.0733838
PC5434_c0_g1	423.582	0.624818	0.236231	2.64495	0.00817026	0.0734654
PC15411_c0_g2	5738.06	-0.591701	0.223761	-2.64435	0.00818485	0.0735441
PC4592_c0_g1	951.248	-0.987786	0.373728	-2.64306	0.00821604	0.0737622
PC51127_c0_g1	5132.56	1.0325	0.390676	2.64286	0.00822082	0.0737622
PC10932_c2_g1	36.5078	0.911207	0.345023	2.641	0.00826616	0.0738239
PC12454_c0_g1	39.861	0.720517	0.272775	2.64143	0.00825558	0.0738239
PC16036_c1_g1	9756.15	-0.270461	0.102422	-2.64066	0.0082745	0.0738239
PC18493_c0_g1	86.45	1.04203	0.394371	2.64225	0.00823573	0.0738239
PC19599_c0_g1	864.517	-0.30003	0.113585	-2.64146	0.00825493	0.0738239
PC31194_c1_g1	82.7725	-0.961342	0.364024	-2.64087	0.00826927	0.0738239
PC41555_c0_g1	28.1218	-1.29613	0.490787	-2.64092	0.00826802	0.0738239
PC8574_c0_g1	412.893	0.727958	0.275543	2.64191	0.0082441	0.0738239
PC1834_c9_g1	13.2684	2.06176	0.781268	2.639	0.00831515	0.0739734
PC21328_c1_g1	29.3713	1.10191	0.417452	2.63962	0.00829998	0.0739734
PC23694_c0_g2	229.988	-0.954333	0.361636	-2.63894	0.00831665	0.0739734
PC350_c0_g1	1096.03	0.309027	0.117084	2.63936	0.00830627	0.0739734
PC477_c0_g1	769.609	0.635666	0.240894	2.63878	0.00832058	0.0739734
PC8222_c0_g1	66.8516	0.788642	0.298904	2.63844	0.00832878	0.0739942
PC2441_c1_g2	388.111	-1.02636	0.389159	-2.63737	0.00835523	0.0740206
PC2956_c1_g1	35.0304	0.624983	0.236963	2.63747	0.00835275	0.0740206
PC625_c0_g2	41.1547	0.82647	0.313342	2.6376	0.00834962	0.0740206
PC93870_c0_g1	902.96	-0.470203	0.178248	-2.63791	0.0083418	0.0740206
PC13979_c0_g1	9.70676	1.16179	0.440711	2.63617	0.00838469	0.0741775
PC5691_c0_g1	4691.91	-0.895387	0.339629	-2.63637	0.00837986	0.0741775
PC37362_c0_g3	22.4873	1.79987	0.682843	2.63585	0.00839266	0.0741959
PC158_c0_g1	3475.96	-0.40312	0.152986	-2.63501	0.00841343	0.0743274
PC19379_c0_g4	27.3471	1.92402	0.730244	2.63476	0.00841958	0.0743297
PC11635_c0_g1	592.417	0.593692	0.225485	2.63296	0.00846448	0.0743932
PC117443_c0_g1	201.425	-0.391722	0.148803	-2.63248	0.00847644	0.0743932
PC12264_c0_g2	30.8037	0.872076	0.331231	2.63283	0.00846765	0.0743932
PC12744_c0_g1	592.979	-1.37774	0.52336	-2.63249	0.00847616	0.0743932
PC15069_c0_g1	13.7339	1.06116	0.403116	2.63239	0.00847872	0.0743932
PC16070_c0_g1	27.1764	0.992374	0.377027	2.63211	0.00848574	0.0743932
PC22_c0_g2	46.9815	0.661215	0.251187	2.63236	0.00847931	0.0743932
PC22962_c1_g1	23.5294	0.786726	0.298884	2.63221	0.00848321	0.0743932
PC5303_c0_g1	57.0408	-0.831052	0.315723	-2.63222	0.00848295	0.0743932
PC547_c0_g1	64.8093	0.561961	0.213376	2.63367	0.00844685	0.0743932
PC16217_c0_g1	68.0783	-1.20647	0.458439	-2.6317	0.00849588	0.0744304
PC9370_c3_g1	33.9867	0.596479	0.226755	2.6305	0.00852593	0.0746418
PC117182_c0_g1	51.612	1.02615	0.390261	2.6294	0.00855347	0.0746503
PC2352_c3_g2	644.831	0.403382	0.153372	2.63009	0.00853611	0.0746503
PC5062_c1_g1	46.5405	0.541807	0.206066	2.62928	0.00855648	0.0746503
PC66155_c0_g1	9.28372	-2.5714	0.9779	-2.62951	0.00855071	0.0746503
PC87131_c0_g1	21.7637	2.56006	0.97365	2.62934	0.00855506	0.0746503
PC27830_c0_g1	1732.82	-0.815301	0.310143	-2.62879	0.00856899	0.0746562
PC46361_c0_g1	410.382	-1.39583	0.530962	-2.62888	0.00856678	0.0746562
PC39187_c0_g2	38.6577	1.20738	0.459367	2.62835	0.00857992	0.0746998
PC1060_c0_g1	342.317	0.573385	0.218176	2.62808	0.00858677	0.0747079
PC670_c0_g1	105.501	0.582857	0.221892	2.62677	0.00862007	0.0749459
PC2980_c0_g1	201.746	0.370243	0.141	2.62584	0.00864349	0.0750978
PC4663_c0_g1	214.158	-0.407498	0.155222	-2.62527	0.00865803	0.0751723
PC2965_c0_g1	1568.27	-0.255324	0.0972702	-2.6249	0.00866755	0.0752032
PC5197_c0_g1	3852.06	-1.58864	0.605345	-2.62436	0.00868125	0.0752186
PC71355_c0_g1	1515.68	-0.358281	0.136519	-2.62441	0.00868002	0.0752186
PC15509_c0_g1	279.449	0.413172	0.157482	2.62362	0.00870019	0.0752824
PC5704_c0_g1	562.952	-1.2437	0.474044	-2.6236	0.00870054	0.0752824
PC7468_c0_g1	691.688	0.740001	0.282083	2.62334	0.00870723	0.0752886
PC83250_c0_g1	6478.24	0.929895	0.354516	2.623	0.00871589	0.0753119
PC1044_c0_g1	1120.51	-0.508747	0.194034	-2.62195	0.00874279	0.0753876
PC1230_c0_g1	715.972	-0.481504	0.183659	-2.62173	0.00874856	0.0753876
PC31575_c0_g4	18.7169	0.895002	0.341305	2.62229	0.00873403	0.0753876
PC4022_c0_g1	436.779	1.1261	0.429494	2.62191	0.0087438	0.0753876
PC12927_c0_g1	41.9761	1.32173	0.504311	2.62086	0.00877092	0.0755287
PC44453_c0_g1	395.933	0.869144	0.331768	2.61973	0.00879984	0.0756886
PC94429_c0_g1	9.96912	-1.23957	0.47318	-2.61967	0.00880149	0.0756886
PC27387_c0_g4	7.67178	-1.1037	0.42162	-2.61777	0.00885062	0.0758526
PC27870_c0_g1	9.05286	1.6891	0.645226	2.61784	0.00884886	0.0758526
PC4279_c1_g1	149.502	-0.979822	0.374222	-2.61829	0.0088372	0.0758526
PC70456_c0_g1	26.3458	-1.79842	0.686835	-2.61841	0.00883398	0.0758526
PC94220_c0_g1	36.4454	0.850201	0.324755	2.61798	0.00884521	0.0758526
PC18232_c0_g1	5564.37	-0.248383	0.0949291	-2.61652	0.0088832	0.0760389
PC25313_c0_g1	25.5825	1.2596	0.48141	2.61647	0.00888441	0.0760389
PC6823_c0_g1	26.8699	0.944827	0.361156	2.61612	0.00889351	0.0760652
PC13854_c0_g1	418.639	-1.18698	0.453858	-2.61531	0.00891463	0.0760723
PC16500_c0_g1	68.3535	0.786381	0.300764	2.61461	0.008933	0.0760723
PC5105_c0_g1	877.959	-0.779584	0.298153	-2.61471	0.00893036	0.0760723
PC65588_c0_g3	1136.7	0.732087	0.279888	2.61564	0.00890603	0.0760723
PC7170_c0_g1	2356.04	-0.274011	0.10479	-2.61486	0.00892638	0.0760723
PC8544_c0_g1	3945.07	-1.53825	0.58836	-2.61447	0.00893656	0.0760723
PC9769_c0_g1	1001.86	-0.694	0.265372	-2.61519	0.00891772	0.0760723
PC26_c2_g3	244.432	-0.326927	0.125135	-2.61261	0.00898549	0.0764373
PC6170_c0_g1	741.899	0.615943	0.235792	2.61223	0.00899544	0.0764704
PC11815_c0_g2	678.282	0.8812	0.337448	2.61136	0.00901819	0.0765173
PC4610_c0_g2	1206.01	0.699405	0.267812	2.61155	0.00901316	0.0765173
PC7025_c0_g1	398.648	-0.832244	0.318705	-2.61133	0.00901916	0.0765173
PC3432_c0_g1	19.9571	-0.711471	0.272611	-2.60984	0.00905843	0.0767988
PC25960_c1_g4	790.034	-0.366675	0.140522	-2.60939	0.0090705	0.076801
PC4682_c0_g1	554.482	-0.855908	0.328042	-2.60914	0.00907695	0.076801
PC5435_c1_g1	2151.45	0.510838	0.195787	2.60915	0.00907685	0.076801
PC2077_c0_g1	2582.38	-0.674292	0.2585	-2.60848	0.00909452	0.0768428
PC22976_c1_g1	89.8805	0.678249	0.260025	2.6084	0.00909671	0.0768428
PC56217_c0_g1	74.9385	0.870883	0.333908	2.60816	0.00910311	0.0768428
PC9338_c0_g1	102.186	-0.517094	0.198269	-2.60804	0.00910626	0.0768428
PC17613_c2_g1	53.4786	0.737464	0.282818	2.60756	0.00911906	0.0768994
PC3869_c0_g1	615.811	0.710828	0.272693	2.60669	0.00914208	0.077042
PC8010_c0_g2	31.1685	0.76376	0.293034	2.60638	0.00915038	0.0770605
PC16670_c1_g2	13.4233	-1.20911	0.464016	-2.60575	0.00916732	0.0771516
PC131_c0_g1	2701.08	-1.52924	0.586965	-2.60534	0.00917837	0.0771524
PC3962_c0_g1	102.45	1.21418	0.466043	2.60529	0.00917965	0.0771524
PC1898_c0_g1	208.712	-0.503883	0.193426	-2.60504	0.00918625	0.0771565
PC87_c0_g1	168.448	-0.810971	0.311365	-2.60457	0.00919906	0.0772127
PC13732_c0_g1	49.4016	-1.21689	0.467377	-2.60365	0.00922372	0.0772785
PC5647_c0_g1	155.325	-0.924333	0.354994	-2.6038	0.00921965	0.0772785
PC8035_c0_g1	168.992	-0.811868	0.311826	-2.60359	0.00922527	0.0772785
PC1189_c1_g1	5047.72	-0.289354	0.111155	-2.60316	0.00923693	0.0773248
PC13540_c0_g1	4638.01	-0.645602	0.248038	-2.60283	0.00924569	0.0773468
PC1377_c0_g1	69.2938	0.775828	0.298167	2.60199	0.00926853	0.0774865
PC2611_c0_g1	122.836	-0.680012	0.261381	-2.60161	0.00927872	0.0775203
PC105_c0_g2	442.492	-1.63063	0.627083	-2.60035	0.00931299	0.0776188
PC13269_c0_g1	3497.46	-0.447987	0.172258	-2.60068	0.00930399	0.0776188
PC3951_c0_g1	176.72	0.555607	0.213634	2.60074	0.00930235	0.0776188
PC468_c0_g2	995.08	-1.50613	0.579222	-2.60027	0.00931511	0.0776188
PC1878_c0_g1	318.892	-0.50285	0.193411	-2.59991	0.00932486	0.0776487
PC20566_c0_g1	25.4719	1.90738	0.733878	2.59904	0.00934852	0.0777069
PC21228_c4_g2	24.1793	1.09289	0.420546	2.59875	0.00935647	0.0777069
PC253_c0_g3	916.891	-0.449112	0.17278	-2.59933	0.0093407	0.0777069
PC7136_c0_g1	429.667	-1.42893	0.549855	-2.59875	0.00935649	0.0777069
PC10181_c0_g1	1127.9	-0.644701	0.248234	-2.59715	0.00939997	0.0778158
PC1292_c9_g2	63.7716	0.872798	0.336038	2.59732	0.00939541	0.0778158
PC264_c0_g1	7651.6	-1.77236	0.68243	-2.59714	0.00940044	0.0778158
PC30753_c0_g1	35.0212	-1.63741	0.630401	-2.59741	0.00939305	0.0778158
PC7916_c0_g1	198.604	0.732527	0.282044	2.59721	0.00939846	0.0778158
PC5026_c0_g1	203.313	0.639274	0.246178	2.5968	0.00940967	0.0778411
PC31308_c0_g2	209.659	0.920151	0.354399	2.59637	0.00942148	0.0778877
PC2793_c0_g1	201.409	-0.359995	0.138723	-2.59507	0.0094573	0.0780305
PC3624_c0_g1	3322.13	0.56372	0.217221	2.59514	0.00945515	0.0780305
PC5149_c0_g2	102.081	-0.457131	0.176131	-2.5954	0.00944811	0.0780305
PC22308_c0_g1	101.561	1.44977	0.55882	2.59434	0.00947737	0.0780939
PC465_c0_g1	1002.16	-0.773028	0.297954	-2.59445	0.00947412	0.0780939
PC1744_c0_g1	4026.64	-0.876596	0.337996	-2.59351	0.00950019	0.0781288
PC193_c0_g1	2832.83	-0.790977	0.304968	-2.59364	0.00949666	0.0781288
PC2616_c1_g1	14.5068	1.01894	0.392856	2.59366	0.00949602	0.0781288
PC1799_c0_g1	52.0462	0.689407	0.265876	2.59297	0.00951508	0.0781494
PC19242_c0_g1	8.62425	1.83077	0.706039	2.59302	0.00951371	0.0781494
PC174_c10_g1	14.0616	-1.38233	0.533186	-2.59259	0.00952551	0.0781842
PC71184_c0_g1	195.181	-0.942269	0.363562	-2.59177	0.00954836	0.0783207
PC2341_c0_g1	363.404	-0.436022	0.168265	-2.59127	0.00956212	0.0783446
PC5960_c1_g1	241.931	-0.802337	0.309642	-2.59118	0.00956484	0.0783446
PC6772_c0_g1	8.12066	1.03592	0.399814	2.59099	0.00956989	0.0783446
PC48924_c0_g1	45.6385	1.76733	0.682289	2.59029	0.00958951	0.0784543
PC131068_c0_g1	17.3708	-1.04802	0.4047	-2.58963	0.00960805	0.0784621
PC14263_c0_g1	35.8288	0.914097	0.35299	2.58959	0.00960913	0.0784621
PC209_c1_g2	13768.1	-0.283299	0.109395	-2.58969	0.00960623	0.0784621
PC7409_c0_g1	133.296	0.90867	0.350962	2.58908	0.00962322	0.0785264
PC4293_c0_g1	62.9205	0.536286	0.207179	2.58852	0.00963891	0.0786035
PC1908_c0_g1	123.973	-0.416753	0.161016	-2.58826	0.00964611	0.0786114
PC2427_c0_g1	58.4748	0.487371	0.188339	2.58774	0.00966082	0.0786805
PC8402_c1_g1	713.705	0.601413	0.23243	2.58749	0.00966768	0.0786856
PC2200_c0_g1	1923.49	-0.404225	0.156258	-2.5869	0.00968431	0.0787701
PC14504_c0_g1	1134.05	0.563018	0.217748	2.58564	0.00971981	0.0789408
PC8466_c1_g2	13349.5	-0.459198	0.177606	-2.58549	0.00972407	0.0789408
PC96814_c0_g1	22.0248	1.4524	0.561746	2.5855	0.00972368	0.0789408
PC2102_c4_g1	19.6021	-0.881166	0.340912	-2.58473	0.00974547	0.0790515
PC4364_c0_g1	540.693	0.792472	0.306617	2.58456	0.00975023	0.0790515
PC15292_c0_g2	54.2628	1.57348	0.609112	2.58324	0.00978763	0.0793037
PC3619_c0_g1	637.284	-0.924761	0.358122	-2.58225	0.00981579	0.079382
PC5572_c0_g1	1217.62	-1.55921	0.603757	-2.58251	0.00980846	0.079382
PC609_c0_g1	3196.83	0.585724	0.226828	2.58224	0.00981618	0.079382
PC18727_c0_g1	11.4217	-1.65063	0.639353	-2.58172	0.00983105	0.0794514
PC8070_c0_g3	7.40329	1.44379	0.559421	2.58086	0.00985554	0.0795983
PC299_c0_g2	128.343	0.464676	0.180092	2.58022	0.00987372	0.0796432
PC5703_c0_g1	1230.67	-0.686656	0.266101	-2.58044	0.00986755	0.0796432
PC25811_c0_g2	18.2854	-0.969429	0.375925	-2.57878	0.00991492	0.0798911
PC3578_c0_g1	37.6546	0.55835	0.216523	2.57871	0.00991712	0.0798911
PC243_c0_g1	3173.77	-0.365095	0.141613	-2.57812	0.0099339	0.0799752
PC22501_c2_g2	19.9118	-1.49913	0.581681	-2.57723	0.00995948	0.0800279
PC24706_c0_g1	5613.87	-0.550401	0.213553	-2.57734	0.00995626	0.0800279
PC27_c2_g2	135.542	0.702862	0.272678	2.57763	0.0099481	0.0800279
PC2258_c0_g1	5093.68	-0.51682	0.200572	-2.57674	0.00997379	0.0800919
PC13278_c1_g1	321.482	0.570226	0.221378	2.5758	0.0100008	0.080105
PC642_c0_g1	402.297	-0.774831	0.300766	-2.57619	0.00998945	0.080105
PC97012_c0_g1	20.6012	1.61862	0.628304	2.57618	0.00998989	0.080105
PC9800_c0_g1	48.3771	-0.717062	0.278363	-2.576	0.00999518	0.080105
PC6793_c0_g1	717.539	-0.605098	0.235007	-2.57481	0.0100296	0.0802335
PC8973_c0_g2	25.1682	1.44001	0.559228	2.57499	0.0100242	0.0802335
PC13_c0_g2	66.7731	0.462613	0.179792	2.57305	0.0100807	0.080556
PC2716_c0_g1	6353.03	-0.307861	0.119694	-2.57207	0.0101093	0.080556
PC27701_c0_g1	457.723	0.33668	0.130873	2.57257	0.0100948	0.080556
PC3296_c0_g1	48.9215	0.698284	0.271506	2.57189	0.0101146	0.080556
PC4284_c0_g1	188.696	-0.35605	0.138439	-2.57189	0.0101146	0.080556
PC6998_c0_g1	1365.85	-1.26169	0.490497	-2.57226	0.0101037	0.080556
PC8477_c0_g1	270.263	1.52945	0.59461	2.57218	0.010106	0.080556
PC10129_c0_g1	1582.37	0.799611	0.311007	2.57103	0.0101395	0.0806261
PC4655_c0_g1	850.764	-0.255003	0.0991723	-2.57132	0.0101313	0.0806261
PC5227_c0_g1	5012.68	-0.327779	0.127494	-2.57093	0.0101426	0.0806261
PC873_c0_g1	614.191	-0.438267	0.170529	-2.57004	0.0101685	0.0807817
PC1067_c0_g1	126.355	-0.465036	0.181089	-2.56799	0.010229	0.0808701
PC2475_c2_g1	10.694	-1.0884	0.423773	-2.56835	0.0102183	0.0808701
PC2783_c0_g1	410.203	0.836184	0.32555	2.56853	0.0102132	0.0808701
PC3954_c0_g1	1571.18	0.920403	0.358298	2.56882	0.0102046	0.0808701
PC419_c0_g1	1323.11	-0.610238	0.237618	-2.56815	0.0102243	0.0808701
PC4408_c1_g1	37.0443	0.711508	0.277075	2.56792	0.010231	0.0808701
PC6478_c0_g1	5025.13	-1.0007	0.389518	-2.56908	0.0101969	0.0808701
PC8727_c0_g1	3307.09	-0.484416	0.18857	-2.56889	0.0102024	0.0808701
PC65314_c0_g1	152.24	0.61805	0.240758	2.5671	0.0102553	0.0810117
PC19039_c0_g1	32.5217	3.11144	1.21255	2.56603	0.0102871	0.0812119
PC10168_c0_g3	165.537	0.588967	0.229597	2.56523	0.0103109	0.0813164
PC3552_c1_g1	10262.5	-0.287958	0.112262	-2.56505	0.0103161	0.0813164
PC5849_c0_g1	450.572	-0.373584	0.145651	-2.56493	0.0103196	0.0813164
PC9802_c1_g1	12.0785	2.09407	0.816657	2.56419	0.0103416	0.0814382
PC1838_c0_g1	2822.08	0.595224	0.232209	2.56331	0.0103679	0.0815437
PC26680_c0_g2	48.5056	0.776553	0.302939	2.5634	0.0103654	0.0815437
PC3071_c0_g1	106.07	0.466009	0.181829	2.5629	0.0103801	0.0815889
PC2416_c0_g1	65.1704	0.80216	0.31303	2.56257	0.0103902	0.0816164
PC82532_c0_g1	141.294	1.06053	0.413889	2.56235	0.0103965	0.0816164
PC14071_c0_g1	19.6016	1.30451	0.509205	2.56185	0.0104116	0.0816841
PC15713_c2_g1	7.34859	1.62621	0.634943	2.56119	0.0104314	0.0817373
PC33632_c1_g1	102.013	-0.597713	0.233364	-2.56129	0.0104285	0.0817373
PC42209_c0_g1	10555.8	0.959915	0.374881	2.56059	0.0104496	0.0818289
PC16241_c1_g1	117.497	0.924224	0.361073	2.55966	0.0104775	0.0819968
PC22209_c0_g1	6.72278	-2.44859	0.956717	-2.55937	0.0104862	0.0820142
PC26509_c0_g1	177.399	-1.08889	0.425553	-2.55878	0.0105041	0.0821033
PC29630_c0_g1	4824.74	0.460134	0.179887	2.55791	0.0105303	0.0822573
PC1901_c0_g1	5239.5	0.296431	0.11594	2.55676	0.0105651	0.0822798
PC2405_c0_g1	463.649	0.560736	0.219316	2.55674	0.0105657	0.0822798
PC5198_c0_g1	23.6138	-0.734772	0.28731	-2.55742	0.0105452	0.0822798
PC73817_c0_g1	60.2818	-0.634048	0.247991	-2.55674	0.0105658	0.0822798
PC93966_c0_g1	353.719	-0.494981	0.193582	-2.55696	0.010559	0.0822798
PC107579_c0_g1	385.854	0.963628	0.377175	2.55486	0.010623	0.0826743
PC24819_c0_g1	582.622	-0.319521	0.125136	-2.55339	0.0106679	0.0828924
PC58_c0_g1	2362.79	0.422134	0.165313	2.55355	0.0106632	0.0828924
PC9987_c0_g2	14.3824	0.963465	0.377341	2.5533	0.0106708	0.0828924
PC55348_c0_g1	198.481	0.742719	0.290911	2.55308	0.0106775	0.0828933
PC10355_c0_g1	804.482	-0.38789	0.151947	-2.5528	0.010686	0.0829088
PC50557_c0_g1	13.7032	1.66114	0.651002	2.55167	0.0107208	0.0831272
PC1178_c0_g1	54792	-0.765577	0.300211	-2.55013	0.0107683	0.0832
PC13256_c0_g1	1183.28	-0.756989	0.296808	-2.55043	0.0107589	0.0832
PC3375_c0_g3	277.608	0.376851	0.14778	2.55008	0.0107697	0.0832
PC3732_c0_g2	440.977	1.22168	0.479069	2.55011	0.0107689	0.0832
PC5336_c4_g1	10.8861	-2.25113	0.882609	-2.55054	0.0107557	0.0832
PC71963_c0_g1	3105.26	-0.321824	0.126172	-2.55068	0.0107512	0.0832
PC29021_c0_g1	11.3831	1.26753	0.497185	2.54942	0.0107901	0.0832047
PC35128_c0_g1	1483.74	0.950111	0.372632	2.54973	0.0107806	0.0832047
PC5633_c1_g1	32.8581	0.649514	0.254758	2.54954	0.0107867	0.0832047
PC29308_c0_g1	142.941	0.41736	0.163729	2.54909	0.0108004	0.0832332
PC11939_c0_g1	493.239	0.533315	0.209256	2.54862	0.0108149	0.083243
PC82482_c0_g1	29.2967	0.923721	0.362435	2.54865	0.0108139	0.083243
PC1378_c0_g1	154.349	-0.304505	0.119534	-2.54743	0.010852	0.083478
PC2097_c0_g4	565.25	0.814731	0.319898	2.54685	0.0108701	0.0835656
PC1583_c0_g1	663.467	0.798776	0.313765	2.54578	0.0109034	0.0836032
PC23292_c0_g1	76.234	0.968337	0.380392	2.54563	0.0109081	0.0836032
PC29626_c1_g1	15.7081	1.45341	0.570925	2.54571	0.0109057	0.0836032
PC6108_c0_g1	46509.1	-0.735755	0.289019	-2.5457	0.010906	0.0836032
PC9588_c0_g1	4111.69	-0.917241	0.360284	-2.54589	0.0109001	0.0836032
PC8973_c1_g2	12.6837	0.97138	0.381646	2.54524	0.0109204	0.0836465
PC844_c2_g2	141.039	0.681104	0.267855	2.54281	0.0109966	0.0841796
PC29856_c0_g1	84.9923	0.859764	0.338188	2.54227	0.0110136	0.0841886
PC657_c0_g1	688.968	0.507846	0.199772	2.54213	0.0110178	0.0841886
PC6690_c0_g1	65.5968	-0.54687	0.215101	-2.54238	0.01101	0.0841886
PC27827_c0_g1	10.4283	1.20048	0.472289	2.54182	0.0110276	0.0842122
PC13876_c0_g1	22.053	1.10729	0.435795	2.54084	0.0110585	0.0843587
PC5093_c0_g3	21.7662	1.33873	0.526895	2.54079	0.0110601	0.0843587
PC14602_c0_g1	662.623	0.453526	0.178575	2.53969	0.0110952	0.0844964
PC22714_c0_g1	212.83	-1.55044	0.610476	-2.53972	0.0110943	0.0844964
PC40648_c0_g1	43.6916	1.0118	0.39841	2.53959	0.0110983	0.0844964
PC18713_c0_g2	26.4416	1.2482	0.491579	2.53917	0.0111117	0.0844967
PC23224_c1_g1	21.0512	-1.39399	0.548977	-2.53925	0.011109	0.0844967
PC10322_c1_g1	16.4824	1.69008	0.665677	2.53889	0.0111205	0.0845121
PC1124_c2_g1	36.0124	0.745295	0.293593	2.53853	0.0111319	0.0845151
PC3107_c0_g1	218.557	0.488085	0.19228	2.5384	0.011136	0.0845151
PC5273_c0_g2	78.354	0.550398	0.216842	2.53825	0.0111409	0.0845151
PC6068_c0_g1	1376.47	-0.626893	0.247044	-2.53758	0.0111623	0.0846259
PC10461_c0_g1	1483.51	-1.62471	0.640383	-2.53709	0.0111778	0.0846926
PC296_c0_g1	13.8803	1.44471	0.569495	2.53682	0.0111865	0.0847075
PC26497_c0_g1	202.144	-1.51001	0.595296	-2.53657	0.0111943	0.0847163
PC3680_c3_g1	13.5163	0.964603	0.380457	2.53538	0.0112326	0.0849552
PC1102_c0_g1	2967.06	-0.677054	0.26709	-2.53493	0.0112471	0.0850134
PC1448_c0_g2	99.0784	1.83771	0.725046	2.53461	0.0112571	0.0850387
PC4199_c1_g1	49.2665	-0.758573	0.299349	-2.53407	0.0112745	0.0850678
PC4227_c0_g2	14.5704	-0.852601	0.336439	-2.53419	0.0112707	0.0850678
PC3039_c1_g1	44.9746	1.06224	0.419222	2.53385	0.0112817	0.0850715
PC1354_c0_g2	554.97	-1.29587	0.511514	-2.53339	0.0112965	0.0851318
PC4786_c0_g1	721.062	-0.333858	0.1318	-2.53306	0.0113071	0.0851614
PC30752_c0_g1	8.97491	-1.90245	0.751228	-2.53246	0.0113267	0.0852067
PC3956_c0_g1	1520.39	0.448631	0.177141	2.53262	0.0113212	0.0852067
PC18896_c0_g1	14.357	1.09358	0.432006	2.5314	0.0113607	0.0854121
PC7517_c0_g1	1300.64	-0.442411	0.174854	-2.53018	0.0114005	0.08566
PC8049_c0_g1	30.7801	-0.890144	0.35206	-2.52839	0.0114588	0.0860466
PC6946_c0_g1	1034.13	-0.455512	0.180267	-2.52688	0.0115082	0.0863662
PC5649_c1_g1	38.0486	1.07642	0.426053	2.52649	0.0115208	0.0864091
PC1330_c0_g1	178.569	0.476397	0.188592	2.52608	0.0115344	0.0864604
PC14438_c0_g3	9.54306	1.13152	0.448083	2.52525	0.0115614	0.0866113
PC13840_c1_g1	33.259	0.643316	0.254881	2.52398	0.0116033	0.0866165
PC19637_c0_g1	12.7724	0.85752	0.339639	2.5248	0.0115764	0.0866165
PC2735_c0_g1	669.496	0.341293	0.135185	2.52463	0.0115821	0.0866165
PC32696_c0_g1	561.564	-1.55795	0.617251	-2.52401	0.0116025	0.0866165
PC4194_c0_g1	230.046	0.899613	0.35642	2.52402	0.011602	0.0866165
PC7211_c0_g2	262.952	0.855558	0.338933	2.52427	0.0115938	0.0866165
PC7687_c0_g1	2184.63	-0.388216	0.153861	-2.52317	0.0116304	0.0867544
PC9445_c0_g1	40.6682	0.835849	0.331291	2.52301	0.0116356	0.0867544
PC1625_c2_g1	44.4409	-0.608589	0.241252	-2.52263	0.0116481	0.0867966
PC12113_c0_g1	28.1888	0.763854	0.302933	2.52153	0.0116846	0.0869182
PC16261_c0_g1	89.8564	1.07303	0.425525	2.52166	0.0116803	0.0869182
PC23264_c0_g1	158.622	-0.409141	0.162301	-2.52088	0.0117061	0.0869182
PC4028_c0_g1	465.441	0.362011	0.143585	2.52122	0.0116947	0.0869182
PC49389_c0_g2	80.6941	-0.949457	0.37662	-2.52099	0.0117024	0.0869182
PC71123_c0_g1	185.886	-1.3408	0.531876	-2.52089	0.0117059	0.0869182
PC7909_c0_g2	416.586	-0.425317	0.168731	-2.52069	0.0117126	0.0869182
PC7542_c0_g1	418.254	-0.243924	0.0967967	-2.51997	0.0117366	0.0870451
PC6257_c0_g1	631.656	0.48232	0.191464	2.51912	0.0117649	0.0872036
PC14485_c0_g1	89.843	0.486189	0.193066	2.51825	0.0117938	0.0873662
PC13734_c0_g1	359.762	-1.01009	0.401436	-2.5162	0.0118627	0.0876186
PC1460_c0_g3	98.2592	0.665655	0.264597	2.51574	0.0118784	0.0876186
PC2440_c0_g2	210.875	-0.414137	0.164582	-2.51629	0.0118596	0.0876186
PC25980_c0_g1	12.0151	1.01812	0.40456	2.51661	0.011849	0.0876186
PC5563_c0_g1	870.21	-0.457639	0.1819	-2.51588	0.0118734	0.0876186
PC563_c2_g1	172.371	0.907369	0.360633	2.51605	0.0118679	0.0876186
PC62557_c1_g1	31.4135	-0.952661	0.378703	-2.51559	0.0118834	0.0876186
PC8461_c0_g3	2606.08	-0.665585	0.264469	-2.51668	0.0118466	0.0876186
PC2516_c0_g2	125.392	-0.50584	0.201203	-2.51408	0.0119343	0.0879422
PC13549_c0_g1	109.298	-1.04448	0.415597	-2.51321	0.0119638	0.0880568
PC18803_c2_g2	7.3806	-1.12381	0.447134	-2.51336	0.0119587	0.0880568
PC3671_c0_g1	1238.74	-0.576884	0.229587	-2.5127	0.011981	0.0881322
PC7441_c0_g1	338.837	0.686324	0.273279	2.51144	0.012024	0.0883964
PC31321_c1_g1	17.5776	-1.28104	0.51025	-2.51061	0.0120523	0.0884018
PC3616_c0_g1	33.1071	0.985737	0.392594	2.51083	0.0120448	0.0884018
PC471_c3_g2	219.854	-0.393884	0.156888	-2.5106	0.0120527	0.0884018
PC932_c1_g2	27.8579	-0.880036	0.350513	-2.51071	0.0120489	0.0884018
PC13649_c0_g1	16.5372	-0.841505	0.335248	-2.5101	0.0120698	0.0884268
PC7185_c0_g4	21.4105	-1.24711	0.496841	-2.51009	0.0120702	0.0884268
PC3247_c0_g1	146.549	-0.33284	0.132629	-2.50956	0.0120881	0.088507
PC4957_c1_g2	396.246	0.6323	0.25206	2.50853	0.0121234	0.088714
PC1923_c0_g3	426.934	-0.323751	0.129101	-2.50773	0.0121509	0.088719
PC3016_c1_g1	732.909	-0.602855	0.24038	-2.50793	0.0121442	0.088719
PC4807_c0_g1	353.631	0.629037	0.250791	2.50821	0.0121344	0.088719
PC60595_c0_g1	21.2632	0.888972	0.354498	2.50769	0.0121522	0.088719
PC15663_c0_g1	76.3106	0.650823	0.2596	2.50702	0.0121754	0.0887344
PC37570_c0_g1	162.694	-0.820097	0.327107	-2.50712	0.0121718	0.0887344
PC684_c0_g1	1958.28	-0.539422	0.215136	-2.50735	0.012164	0.0887344
PC29704_c0_g1	20.9753	-2.01533	0.804018	-2.50658	0.0121905	0.0887419
PC54258_c0_g1	24.2274	-0.948495	0.378396	-2.50662	0.0121893	0.0887419
PC7084_c0_g1	631.636	0.46766	0.18663	2.50582	0.0122168	0.0888308
PC9770_c0_g1	662.507	-0.392266	0.15654	-2.50585	0.0122157	0.0888308
PC7295_c0_g1	139.189	0.802978	0.320627	2.5044	0.0122659	0.0891362
PC16401_c0_g2	124.482	-0.859385	0.343267	-2.50355	0.0122956	0.0891977
PC20846_c0_g1	32.0932	0.725342	0.289687	2.50388	0.0122841	0.0891977
PC7356_c0_g1	1743.41	0.521779	0.208406	2.50367	0.0122913	0.0891977
PC4129_c0_g1	124.106	-0.561286	0.224312	-2.50225	0.0123406	0.0894447
PC4757_c0_g1	501.142	-0.376612	0.150515	-2.50215	0.0123441	0.0894447
PC60685_c2_g1	22.9794	-1.08419	0.433336	-2.50196	0.0123509	0.0894447
PC5_c0_g2	285.088	0.505467	0.202106	2.50101	0.0123841	0.0896335
PC5047_c1_g1	110.365	0.566028	0.226416	2.49994	0.0124213	0.0898001
PC9617_c0_g1	349.442	0.573438	0.229372	2.50003	0.0124181	0.0898001
PC8048_c0_g2	89.8617	0.798062	0.319289	2.49949	0.0124371	0.0898623
PC29296_c0_g1	18.9335	0.891025	0.356537	2.49911	0.0124507	0.0899091
PC5111_c0_g1	184.348	0.668525	0.267586	2.49836	0.012477	0.0899266
PC5684_c0_g1	968.672	0.431333	0.172623	2.4987	0.0124651	0.0899266
PC57059_c0_g1	1303.01	0.968495	0.387633	2.49848	0.0124726	0.0899266
PC7380_c0_g1	91.9303	0.374501	0.149907	2.49823	0.0124816	0.0899266
PC2168_c0_g1	1061.46	0.727258	0.291167	2.49773	0.012499	0.0899496
PC3971_c3_g1	296.964	-0.960955	0.38472	-2.4978	0.0124965	0.0899496
PC44507_c0_g1	149.856	0.670427	0.268471	2.49721	0.0125175	0.0899801
PC7822_c0_g1	29.1082	-0.624347	0.250012	-2.49727	0.0125152	0.0899801
PC2510_c1_g2	16.8098	0.867759	0.347523	2.49698	0.0125255	0.0899862
PC2207_c0_g2	29.3116	0.614639	0.246233	2.49617	0.0125544	0.0901422
PC10550_c1_g1	86.3016	1.0876	0.435943	2.49483	0.0126016	0.0903788
PC1498_c2_g1	156.873	-0.483287	0.193742	-2.49449	0.012614	0.0903788
PC2387_c0_g1	51.3562	0.78227	0.313607	2.49443	0.012616	0.0903788
PC71514_c0_g1	109.446	-1.23657	0.495665	-2.49476	0.0126042	0.0903788
PC27_c5_g1	8306.56	-0.232716	0.0933066	-2.4941	0.0126278	0.0904124
PC15451_c0_g1	77.4246	-0.838109	0.336068	-2.49387	0.012636	0.0904197
PC5784_c1_g1	53.6113	0.621724	0.249342	2.49346	0.0126505	0.090472
PC37588_c0_g1	16.2519	-1.76059	0.706213	-2.493	0.0126667	0.0905243
PC8296_c0_g1	99.6761	0.322382	0.129323	2.49285	0.0126722	0.0905243
PC15836_c1_g1	138.026	0.735862	0.295253	2.49231	0.0126915	0.0906109
PC4512_c0_g1	7295.05	-0.567455	0.227756	-2.4915	0.0127203	0.0907655
PC11397_c0_g1	11.1424	-0.941554	0.377983	-2.491	0.0127385	0.0908089
PC17223_c0_g1	56.6222	1.93059	0.775048	2.49093	0.0127408	0.0908089
PC19545_c0_g1	21.5468	0.691637	0.277708	2.49052	0.0127557	0.0908127
PC49425_c0_g1	51.533	-0.527122	0.21164	-2.49065	0.012751	0.0908127
PC1769_c3_g1	143.954	0.511786	0.205515	2.49027	0.0127648	0.0908257
PC5453_c0_g2	21.0507	0.770595	0.30947	2.49005	0.0127727	0.0908307
PC7376_c0_g1	22.3527	1.0141	0.40733	2.48962	0.0127878	0.0908847
PC8014_c0_g1	113.376	-0.428562	0.172153	-2.48943	0.0127947	0.0908847
PC6839_c0_g1	165.678	-0.642866	0.258263	-2.48919	0.0128033	0.0908947
PC11430_c0_g1	1080.57	0.531658	0.2137	2.48786	0.0128513	0.0909282
PC12369_c0_g1	820.379	-0.613013	0.246344	-2.48844	0.0128305	0.0909282
PC4417_c0_g1	110.292	-1.09582	0.440371	-2.48839	0.0128322	0.0909282
PC4516_c0_g1	49.9594	0.752683	0.302527	2.48799	0.0128467	0.0909282
PC71471_c0_g1	6.30742	-1.35855	0.54606	-2.48792	0.0128493	0.0909282
PC7430_c0_g1	257.499	0.840408	0.337765	2.48814	0.0128413	0.0909282
PC8274_c0_g1	257.874	-0.390675	0.157048	-2.48761	0.0128605	0.0909429
PC20175_c0_g1	12.0389	0.99882	0.401747	2.48619	0.0129117	0.0912537
PC1133_c0_g1	2152.7	-0.990232	0.398442	-2.48526	0.0129458	0.0913823
PC2774_c0_g1	4194.43	-0.43332	0.174342	-2.48546	0.0129384	0.0913823
PC5270_c0_g1	618.51	-0.284166	0.114352	-2.485	0.0129551	0.0913823
PC9480_c0_g1	2088.2	-1.54801	0.622968	-2.4849	0.0129589	0.0913823
PC83559_c0_g1	49.9835	-1.46198	0.588513	-2.4842	0.0129843	0.09151
PC2488_c0_g1	260.733	-0.418692	0.168604	-2.48329	0.0130176	0.0916938
PC19535_c0_g1	52.5875	-1.05669	0.425584	-2.48293	0.0130308	0.0917199
PC20677_c0_g1	93.0839	-1.08724	0.437911	-2.48279	0.0130359	0.0917199
PC27201_c0_g1	105.203	0.539321	0.217308	2.48183	0.0130709	0.0918667
PC503_c0_g2	215.209	0.394859	0.159101	2.48182	0.0130713	0.0918667
PC557_c0_g1	1928.81	-0.366875	0.147849	-2.48143	0.0130858	0.0919173
PC12228_c0_g1	163.236	-0.364919	0.147075	-2.48118	0.0130947	0.0919291
PC12803_c0_g1	147.091	0.557875	0.224895	2.4806	0.013116	0.0920275
PC6148_c0_g1	234.362	-0.493548	0.199036	-2.4797	0.0131494	0.0921588
PC9390_c3_g1	259.256	-0.313731	0.126514	-2.4798	0.0131454	0.0921588
PC16162_c0_g1	73.6463	0.713402	0.287767	2.47909	0.0131717	0.0922639
PC14818_c1_g1	39.6216	0.762711	0.307698	2.47876	0.013184	0.0922883
PC19649_c0_g3	29.5608	-1.34597	0.543081	-2.47841	0.0131971	0.0922883
PC36259_c0_g2	44.5686	1.08775	0.438856	2.4786	0.01319	0.0922883
PC8306_c0_g1	80.1123	0.500853	0.202107	2.47816	0.0132063	0.0923014
PC3895_c0_g1	244.268	-0.545123	0.219996	-2.47788	0.0132166	0.0923224
PC105626_c0_g1	1640.69	-0.527711	0.213049	-2.47694	0.0132513	0.0923244
PC11344_c0_g1	3947.64	-0.651062	0.262814	-2.47728	0.013239	0.0923244
PC13815_c0_g1	75.2386	-1.74672	0.705227	-2.47682	0.0132559	0.0923244
PC15848_c0_g1	38.7642	0.650386	0.262766	2.47516	0.0133178	0.0923244
PC16280_c0_g1	21.4251	0.678216	0.273927	2.4759	0.0132902	0.0923244
PC1812_c0_g1	1428.41	0.939143	0.379216	2.47654	0.0132663	0.0923244
PC23783_c1_g1	13.1336	-2.28934	0.924762	-2.4756	0.0133011	0.0923244
PC5363_c0_g2	60.8755	-0.926175	0.373949	-2.47674	0.0132589	0.0923244
PC5846_c1_g1	2363.28	0.582446	0.235211	2.47628	0.0132761	0.0923244
PC6309_c0_g1	524.592	-0.302155	0.122087	-2.47492	0.0133267	0.0923244
PC6968_c0_g1	885.784	-0.738741	0.298314	-2.47639	0.0132719	0.0923244
PC740_c0_g1	317.229	-0.374462	0.151265	-2.47553	0.0133038	0.0923244
PC7574_c1_g2	347.625	0.755899	0.305274	2.47614	0.0132813	0.0923244
PC78833_c0_g1	30.0977	0.999766	0.403931	2.47509	0.0133203	0.0923244
PC9680_c0_g1	243.227	0.906873	0.366346	2.47546	0.0133066	0.0923244
PC18279_c0_g3	19.5242	0.950146	0.384028	2.47416	0.0133552	0.0924709
PC12425_c0_g1	4183.05	-0.335358	0.135614	-2.47289	0.0134026	0.0925455
PC1910_c2_g1	1265.65	0.651463	0.263413	2.47316	0.0133924	0.0925455
PC5362_c0_g1	300.847	0.675559	0.273104	2.47363	0.0133748	0.0925455
PC71862_c0_g1	739.465	-0.29469	0.119163	-2.473	0.0133985	0.0925455
PC7375_c0_g1	1434.08	-0.490211	0.198188	-2.47346	0.013381	0.0925455
PC2881_c2_g1	3110.07	-0.488101	0.197425	-2.47233	0.0134234	0.0926382
PC13044_c0_g1	713.515	-0.773856	0.313052	-2.47197	0.013437	0.0926813
PC13089_c2_g1	179.479	-0.285474	0.115509	-2.47143	0.0134573	0.0927386
PC284_c0_g1	183.518	0.487158	0.197121	2.47136	0.01346	0.0927386
PC1895_c0_g1	602.868	0.483759	0.195821	2.47041	0.0134957	0.0929337
PC11919_c0_g1	36.9325	0.734809	0.297479	2.47012	0.0135068	0.0929594
PC12773_c0_g1	236.326	0.562732	0.227978	2.46836	0.0135732	0.0932826
PC1631_c0_g1	290.524	0.39704	0.160855	2.46831	0.0135753	0.0932826
PC6874_c0_g1	266.159	-1.28449	0.520395	-2.46829	0.0135759	0.0932826
PC117418_c0_g1	11.2417	-0.806533	0.3268	-2.46797	0.0135881	0.0932884
PC19551_c0_g1	1610.09	0.714211	0.289406	2.46785	0.0135927	0.0932884
PC21325_c0_g1	95.4883	-0.386264	0.156529	-2.46769	0.0135989	0.0932884
PC14257_c0_g1	1184.42	-0.315946	0.128079	-2.4668	0.0136326	0.0933254
PC3011_c0_g2	44.1271	1.11663	0.452773	2.4662	0.0136556	0.0933254
PC5024_c0_g2	48.4446	0.645146	0.261559	2.46654	0.0136424	0.0933254
PC6452_c0_g1	1341.65	-1.63098	0.661181	-2.46676	0.013634	0.0933254
PC801_c1_g1	19.2584	-0.841167	0.340989	-2.46685	0.0136309	0.0933254
PC8149_c0_g1	169.301	-0.338062	0.137079	-2.46618	0.0136561	0.0933254
PC94022_c0_g1	2924.62	-1.42606	0.578212	-2.46632	0.0136509	0.0933254
PC2641_c0_g1	352.583	-0.535768	0.217335	-2.46516	0.013695	0.0935407
PC12970_c0_g1	2123.81	-0.856657	0.347593	-2.46454	0.0137188	0.0936521
PC16970_c1_g1	31.3441	1.1921	0.483854	2.46376	0.0137488	0.0937557
PC23802_c0_g1	7.91948	-1.34091	0.54424	-2.46382	0.0137464	0.0937557
PC2176_c0_g2	86.1787	1.20216	0.488143	2.46272	0.0137889	0.0938771
PC2293_c1_g1	49.9799	-0.592135	0.240437	-2.46274	0.0137879	0.0938771
PC4874_c0_g1	554.619	-1.66174	0.674653	-2.4631	0.0137743	0.0938771
PC1352_c0_g1	264.162	0.51171	0.207806	2.46244	0.0137996	0.0938992
PC164_c4_g1	549.448	1.11851	0.454291	2.46211	0.0138123	0.0939347
PC800_c3_g1	54.3425	1.13584	0.461383	2.46183	0.0138232	0.0939581
PC106231_c0_g1	8.31799	1.16776	0.474487	2.46111	0.0138509	0.0939977
PC18402_c0_g1	220.215	0.869257	0.353154	2.46141	0.0138392	0.0939977
PC4828_c0_g1	109.817	0.896836	0.364405	2.4611	0.0138514	0.0939977
PC16543_c0_g1	7.38466	-1.29644	0.527063	-2.45975	0.0139034	0.0941817
PC2266_c0_g1	4824.39	-1.46668	0.596211	-2.46	0.0138936	0.0941817
PC3489_c0_g1	413.62	0.482676	0.196225	2.45981	0.0139011	0.0941817
PC7413_c0_g1	361.954	-0.534161	0.217172	-2.45962	0.0139083	0.0941817
PC128_c1_g1	1251.69	0.346211	0.140872	2.45762	0.013986	0.0942076
PC1486_c0_g1	4268.2	-1.44277	0.586693	-2.45915	0.0139265	0.0942076
PC1736_c0_g1	903.193	-0.288125	0.117168	-2.45907	0.0139296	0.0942076
PC20421_c0_g1	35.9599	-0.733327	0.298368	-2.4578	0.0139793	0.0942076
PC30305_c0_g1	5.78078	-1.47849	0.601601	-2.4576	0.0139868	0.0942076
PC342_c0_g1	4569.9	-1.51034	0.614407	-2.4582	0.0139636	0.0942076
PC3708_c2_g1	64.1497	0.777185	0.316144	2.45833	0.0139585	0.0942076
PC7408_c0_g1	656.854	0.862005	0.350641	2.45837	0.0139571	0.0942076
PC7817_c0_g1	264.865	0.629869	0.256282	2.45772	0.0139823	0.0942076
PC85573_c0_g1	22.6444	1.23427	0.501964	2.45888	0.0139373	0.0942076
PC24396_c1_g2	29.9868	0.564737	0.229857	2.4569	0.0140142	0.0943413
PC51_c3_g1	72.141	1.19567	0.486742	2.45648	0.0140305	0.094401
PC3101_c0_g1	1421.02	-0.673882	0.274377	-2.45604	0.0140477	0.0944162
PC4623_c0_g1	1014.07	-0.363841	0.148141	-2.45604	0.0140477	0.0944162
PC11318_c0_g3	24.5729	0.721162	0.293703	2.45541	0.0140723	0.0944751
PC1852_c0_g1	221.454	-0.320649	0.130608	-2.45505	0.0140865	0.0944751
PC19708_c0_g2	144.452	-0.905126	0.368648	-2.45526	0.0140783	0.0944751
PC7197_c0_g1	7.56077	2.00046	0.814802	2.45514	0.0140828	0.0944751
PC5437_c0_g1	12.1493	1.42723	0.581469	2.45452	0.0141072	0.0945643
PC1414_c0_g4	102.66	0.432565	0.176289	2.45373	0.0141383	0.0945713
PC18445_c0_g1	36.5104	1.30248	0.530809	2.45377	0.0141367	0.0945713
PC6120_c0_g1	7383.29	-0.301553	0.122893	-2.45379	0.014136	0.0945713
PC9441_c0_g2	717.266	-0.521715	0.212587	-2.45413	0.0141227	0.0945713
PC30424_c0_g1	518.335	-0.305868	0.124687	-2.45309	0.0141634	0.0946393
PC6409_c2_g3	12.0572	2.27101	0.925729	2.45321	0.0141587	0.0946393
PC3871_c4_g1	1664.31	0.341048	0.139046	2.45277	0.0141761	0.0946494
PC4013_c0_g1	903.96	0.538012	0.219358	2.45267	0.01418	0.0946494
PC2934_c0_g1	956.481	-0.943773	0.384834	-2.45242	0.01419	0.0946664
PC21180_c0_g1	9.78097	1.41824	0.578395	2.45202	0.0142056	0.0947203
PC1533_c0_g2	50.166	0.86784	0.353978	2.45168	0.014219	0.0947599
PC10221_c0_g1	54.2396	-1.05062	0.428625	-2.45113	0.0142407	0.0948542
PC19146_c0_g1	183.432	0.689875	0.281474	2.45094	0.0142484	0.094855
PC3456_c2_g1	17.2727	1.02362	0.417726	2.45046	0.0142675	0.0949324
PC1793_c6_g1	31.1157	1.05983	0.432645	2.44965	0.0142994	0.0950945
PC11868_c0_g1	52.367	1.13088	0.461688	2.44945	0.0143075	0.0950981
PC25671_c0_g1	8.68878	1.18376	0.483605	2.44777	0.0143741	0.0950981
PC27240_c0_g1	3026.61	-0.412144	0.168283	-2.44911	0.0143208	0.0950981
PC28540_c0_g1	14.9397	0.885055	0.36161	2.44754	0.0143834	0.0950981
PC3145_c1_g1	1156.91	-0.713781	0.291609	-2.44773	0.0143759	0.0950981
PC4445_c0_g1	471.445	0.740954	0.302672	2.44804	0.0143635	0.0950981
PC4809_c0_g2	42.9021	1.21575	0.496757	2.44737	0.0143904	0.0950981
PC5654_c0_g1	133.065	-0.645295	0.263599	-2.44801	0.0143646	0.0950981
PC630_c0_g1	2204.58	-0.999664	0.408213	-2.44888	0.0143301	0.0950981
PC6580_c0_g1	19.3701	-0.677958	0.276838	-2.44894	0.0143279	0.0950981
PC7116_c0_g1	44.5254	-0.80411	0.328541	-2.44752	0.0143843	0.0950981
PC9738_c0_g1	10.9175	0.914259	0.373568	2.44737	0.0143904	0.0950981
PC2577_c0_g2	1047.84	0.582399	0.237994	2.44712	0.0144003	0.0951137
PC6186_c0_g1	255.954	0.434307	0.177526	2.44644	0.0144276	0.095244
PC777_c0_g2	307.612	-1.07403	0.439065	-2.44617	0.0144383	0.0952646
PC1094_c1_g1	338.327	0.474391	0.194014	2.44513	0.01448	0.0953258
PC33538_c0_g1	16.556	-2.05801	0.841663	-2.44517	0.0144784	0.0953258
PC4454_c0_g1	575.939	-0.657649	0.269001	-2.44478	0.014494	0.0953258
PC6342_c2_g1	216.595	0.88311	0.361246	2.44462	0.0145004	0.0953258
PC7112_c0_g1	220.055	-0.352489	0.144184	-2.44473	0.0144962	0.0953258
PC9467_c0_g2	23.0085	0.841094	0.343916	2.44564	0.0144594	0.0953258
PC9757_c0_g1	8.1941	1.46589	0.599536	2.44505	0.0144833	0.0953258
PC6969_c0_g1	572.679	-0.326552	0.133622	-2.44384	0.0145318	0.0954823
PC31269_c1_g1	8.61836	1.18316	0.484263	2.44322	0.0145567	0.09555
PC40169_c0_g1	90.3368	0.864577	0.353869	2.44321	0.0145573	0.09555
PC2857_c0_g1	166.76	0.458569	0.187721	2.44282	0.0145728	0.0956025
PC12528_c0_g1	94.2203	0.602465	0.24673	2.4418	0.0146143	0.0958247
PC1309_c0_g1	584.411	-0.471177	0.193005	-2.44127	0.0146357	0.0958291
PC1761_c0_g2	103.32	0.363551	0.148901	2.44156	0.0146241	0.0958291
PC23967_c0_g1	41.1243	0.687115	0.281464	2.44122	0.0146378	0.0958291
PC7987_c0_g1	125.572	-0.783328	0.320962	-2.44056	0.0146645	0.0959542
PC11189_c0_g1	39.5839	0.722644	0.296154	2.4401	0.0146833	0.0959777
PC5487_c0_g1	146.918	0.41785	0.171236	2.44021	0.0146788	0.0959777
PC1902_c0_g2	27.6927	0.603782	0.247565	2.43888	0.0147328	0.0962517
PC27794_c0_g1	100.813	-1.44374	0.592094	-2.43835	0.0147543	0.0962761
PC56049_c0_g2	288.989	0.741821	0.304207	2.43854	0.0147468	0.0962761
PC6308_c0_g2	1302.52	-0.322908	0.132435	-2.43823	0.0147595	0.0962761
PC72_c0_g1	15882.8	-1.50568	0.617819	-2.43709	0.0148061	0.0964806
PC8169_c0_g1	772.047	-0.285122	0.116985	-2.43726	0.014799	0.0964806
PC8211_c0_g1	142.004	-0.674747	0.276934	-2.43649	0.0148305	0.0965899
PC6287_c0_g1	1097.13	-0.41405	0.170021	-2.43528	0.0148801	0.096863
PC4045_c0_g1	736.621	-0.681714	0.279972	-2.43494	0.0148943	0.096905
PC104936_c0_g1	2781.76	0.884134	0.363237	2.43404	0.0149313	0.0970955
PC2197_c1_g1	18.4384	0.714278	0.293541	2.43331	0.0149614	0.0972412
PC11371_c0_g1	16.9583	0.990551	0.407268	2.43219	0.0150079	0.0973474
PC18361_c0_g2	183.362	-0.459481	0.188961	-2.43161	0.0150317	0.0973474
PC2160_c0_g2	2634.31	-1.23439	0.50758	-2.43192	0.0150191	0.0973474
PC4350_c0_g2	1644.56	-0.631661	0.259727	-2.43202	0.0150149	0.0973474
PC5920_c0_g1	199.773	0.514533	0.211591	2.43174	0.0150266	0.0973474
PC6683_c0_g3	93.721	-0.933622	0.383831	-2.43238	0.015	0.0973474
PC694_c0_g1	44.6315	0.584892	0.240506	2.43192	0.015019	0.0973474
PC12227_c0_g1	299.497	-0.440685	0.181254	-2.43131	0.0150442	0.0973783
PC10518_c0_g1	555.743	-1.42528	0.586409	-2.43052	0.0150773	0.0974925
PC2135_c0_g1	286.078	-0.474558	0.195242	-2.43062	0.0150731	0.0974925
PC43060_c0_g1	12.9807	1.18232	0.486561	2.42996	0.0151005	0.0975926
PC546_c6_g1	831.647	0.701758	0.28882	2.42974	0.0151096	0.0976013
PC25450_c1_g1	8.78249	1.20872	0.497639	2.42891	0.0151441	0.0977741
PC105034_c0_g1	1172.3	0.860846	0.354504	2.42831	0.0151694	0.0978084
PC13019_c0_g3	2594.51	-0.532216	0.219238	-2.42757	0.0152005	0.0978084
PC1409_c3_g1	513.252	-0.684476	0.281885	-2.42821	0.0151735	0.0978084
PC15200_c0_g2	26.0453	-1.13644	0.468103	-2.42775	0.0151928	0.0978084
PC393_c3_g2	87.774	0.560197	0.230772	2.42749	0.0152037	0.0978084
PC6439_c0_g1	1474.88	0.498405	0.205271	2.42804	0.0151808	0.0978084
PC6910_c2_g1	5.73021	1.84764	0.760942	2.4281	0.0151783	0.0978084
PC61057_c0_g1	1079.82	-0.807279	0.332583	-2.4273	0.0152116	0.0978094
PC22269_c0_g1	116.164	-1.14623	0.472264	-2.42711	0.0152198	0.097812
PC3438_c1_g3	15.028	-0.799059	0.329268	-2.42678	0.0152337	0.0978446
PC4450_c0_g1	56683.2	0.422396	0.174068	2.42662	0.0152403	0.0978446
PC15294_c0_g1	43.7181	0.797148	0.328606	2.42585	0.0152726	0.0980019
PC3406_c1_g1	39.1862	1.71223	0.705917	2.42553	0.0152858	0.0980369
PC1105_c0_g1	109.144	-0.443246	0.182767	-2.42521	0.0152997	0.098076
PC5834_c0_g1	1136.08	-0.48816	0.201319	-2.42481	0.0153164	0.0981333
PC83_c0_g1	469.975	-0.289639	0.119466	-2.42444	0.0153319	0.0981828
PC30074_c0_g1	18.9948	0.953799	0.393658	2.42292	0.0153965	0.0984462
PC3708_c1_g1	44.8779	0.591585	0.24416	2.42294	0.0153953	0.0984462
PC4620_c0_g1	133.26	0.698064	0.288091	2.42307	0.01539	0.0984462
PC15155_c0_g1	16.3368	-1.16069	0.479123	-2.42254	0.0154125	0.0984654
PC24905_c1_g1	94.0154	-0.703835	0.290543	-2.42248	0.0154151	0.0984654
PC2340_c0_g1	74.0245	1.56879	0.647651	2.42227	0.0154238	0.0984713
PC1454_c0_g1	644.458	-0.323122	0.133431	-2.42164	0.0154508	0.0985934
PC16509_c0_g1	21.5795	-0.636922	0.26309	-2.42093	0.015481	0.0987361
PC12477_c2_g1	54.0084	0.762555	0.315319	2.41836	0.0155908	0.0993361
PC1874_c4_g1	518.697	-0.440328	0.182072	-2.41843	0.0155878	0.0993361
PC16747_c0_g1	15.2671	-1.10679	0.457737	-2.41797	0.0156076	0.0993622
PC68_c0_g3	3193.13	-0.291336	0.120501	-2.41771	0.0156185	0.0993622
PC9402_c0_g1	735.993	-0.468669	0.193835	-2.41788	0.0156113	0.0993622
PC12835_c0_g1	26.8293	0.651765	0.269624	2.41731	0.0156356	0.0993822
PC33558_c0_g1	7.94958	1.0849	0.448813	2.41727	0.0156374	0.0993822
PC15706_c1_g1	29.642	0.787047	0.325739	2.41619	0.0156839	0.0996275
PC24118_c0_g1	18.0611	-1.53507	0.635538	-2.41539	0.0157184	0.0997464
PC59430_c0_g1	36.655	0.776139	0.321308	2.41556	0.0157109	0.0997464
PC8502_c0_g1	22654.4	-0.459611	0.190301	-2.41519	0.0157271	0.0997512
PC222_c0_g1	328.399	-0.411588	0.170436	-2.41492	0.0157388	0.0997752
PC4839_c1_g1	161.864	0.576274	0.238677	2.41445	0.0157588	0.0998521
PC16410_c0_g1	8.9309	1.07294	0.444431	2.41418	0.0157705	0.0998616
PC960_c0_g1	1176.78	-0.470486	0.194909	-2.41387	0.0157841	0.0998616
PC968_c0_g1	538.362	-0.21849	0.0905088	-2.41402	0.0157774	0.0998616
PC6924_c0_g1	55.5602	0.745481	0.308939	2.41304	0.0158201	0.100039
PC1069_c0_g1	1716.6	-0.677978	0.281102	-2.41186	0.0158714	0.100167
PC17532_c0_g1	4356.67	-0.384168	0.159284	-2.41184	0.015872	0.100167
PC66782_c0_g1	1405.88	0.998015	0.413776	2.41197	0.0158665	0.100167
PC94842_c0_g1	1923.42	0.881179	0.365292	2.41226	0.015854	0.100167
[truncated: 1,046,576+ more rows]

## Sheet: dsNode343-A1_vs_dsmGFP-2
transcript_id	baseMean	log2FoldChange	lfcSE	stat	pvalue	padj
PC0_c0_g1	535.265	0.0941296	0.194474	0.484021	0.628371	0.880553
PC0_c0_g2	121.762	0.251029	0.133453	1.88102	0.0599688	0.471989
PC0_c0_g3	25.5389	-0.549044	0.34313	-1.6001	0.109575	0.581974
PC0_c1_g1	1149.99	-0.0530578	0.116519	-0.455356	0.648853	0.890185
PC1_c0_g1	851.798	-0.0209228	0.105135	-0.199009	0.842255	0.955047
PC1_c0_g2	480.694	-0.318229	0.216908	-1.46711	0.142345	0.622051
PC1_c0_g3	2316.87	-0.200112	0.18397	-1.08774	0.27671	0.729783
PC1_c0_g4	154.753	0.18711	0.438766	0.426446	0.669783	0.896963
PC1_c0_g5	51.8833	0.0465598	0.213857	0.217715	0.827651	0.95124
PC1_c1_g1	135.984	0.16062	0.256383	0.626485	0.530997	0.841261
PC1_c2_g2	64.6516	0.274689	0.206898	1.32766	0.184292	0.662395
PC10_c0_g1	327.539	-0.0533276	0.10494	-0.508174	0.611332	0.872233
PC10_c1_g1	216.131	0.82847	0.580303	1.42765	0.153393	0.633217
PC100_c0_g1	520.72	0.0193381	0.180708	0.107013	0.914779	0.975668
PC100_c1_g1	57.7654	0.116075	0.301594	0.384872	0.700332	0.906803
PC100_c1_g2	48.9086	0.0508843	0.270349	0.188217	0.850706	0.957692
PC100_c1_g5	25.6972	0.249208	0.278962	0.893341	0.371675	0.771176
PC1000_c0_g1	2341.25	0.0592502	0.15003	0.394923	0.6929	0.903297
PC10000_c1_g2	12.1552	0.553811	0.305588	1.81228	0.0699427
PC10002_c0_g1	318.255	-0.408859	0.326985	-1.25039	0.211156	0.688364
PC10002_c1_g1	13.9469	0.376487	0.438416	0.858743	0.390482
PC10003_c0_g1	9.35057	-0.500335	0.421624	-1.18669	0.235351
PC10004_c0_g1	59.3513	-0.5735	0.352843	-1.62537	0.104084	0.571309
PC10004_c1_g1	100.315	-0.0419839	0.259949	-0.161508	0.871693	0.96447
PC10004_c2_g1	2.04593	1.64602	1.30304	1.26322	0.206511
PC10005_c0_g1	44.7111	0.239337	0.271214	0.882468	0.377524	0.771333
PC10006_c0_g1	36.259	-0.180677	0.500248	-0.361175	0.717968	0.911819
PC10006_c0_g2	16.6459	0.427483	0.464373	0.920559	0.357281
PC10009_c0_g1	189.711	-0.0374308	0.177783	-0.210542	0.833244	0.952389
PC10009_c1_g1	7.5967	-0.243103	0.74555	-0.326072	0.74437
PC1001_c0_g1	112.803	-0.331531	0.170888	-1.94005	0.0523733	0.448889
PC10010_c0_g1	1066.63	-0.0305907	0.124957	-0.24481	0.806604	0.945853
PC10012_c0_g1	227.427	0.290736	0.206855	1.40551	0.159871	0.640616
PC10014_c0_g2	5.53349	1.3561	0.396698	3.41846	0.000629773
PC10014_c2_g1	6.70991	0.926705	0.557772	1.66144	0.0966249
PC100140_c0_g1	360.43	0.715295	0.875969	0.816576	0.414171	0.789654
PC10016_c0_g1	748.696	0.0509664	0.169788	0.300177	0.764042	0.930132
PC10018_c1_g1	25.3986	-0.0415528	0.310296	-0.133913	0.893471	0.969537
PC1002_c0_g1	666.41	-0.19536	0.159928	-1.22156	0.221876	0.695484
PC1002_c0_g2	40.6605	-0.0290879	0.169104	-0.172013	0.863428	0.961774
PC1002_c1_g1	119.818	-0.111157	0.149186	-0.745087	0.456219	0.811784
PC1002_c1_g3	71.613	-0.692117	0.87979	-0.786684	0.431467	0.798845
PC10020_c0_g1	873.848	0.22449	0.206573	1.08673	0.277154	0.730185
PC10021_c0_g1	282.559	0.193364	0.148064	1.30594	0.191571	0.670139
PC10022_c0_g1	105.725	-0.335572	0.15626	-2.14752	0.0317515	0.369444
PC10023_c0_g1	239.45	0.0135825	0.254153	0.0534424	0.957379	0.987014
PC52211_c0_g1	55.4319	-5.49455	1.17673	-4.66933	3.02188e-06	0.0016555
PC10023_c0_g3	40.1399	0.107718	0.377855	0.285077	0.775585	0.934499
PC10026_c0_g1	164.348	-0.802842	0.398742	-2.01344	0.0440684	0.418133
PC10028_c0_g2	9.82482	-0.0462053	0.621989	-0.0742864	0.940782
PC10028_c1_g1	6.23017	-0.65514	0.897671	-0.729822	0.465499
PC1003_c0_g1	70.3813	0.0987392	0.197898	0.49894	0.617822	0.876088
PC10030_c0_g1	16.4049	-0.171361	0.410558	-0.417385	0.676397
PC10030_c0_g2	37.4162	-0.0661369	0.328718	-0.201196	0.840545	0.955016
PC10031_c0_g1	5671.84	0.176286	0.142644	1.23585	0.216516	0.691128
PC10031_c1_g1	5.42294	-0.672238	0.573115	-1.17295	0.240814
PC10032_c0_g1	16.209	-0.587946	0.52892	-1.1116	0.266311
PC10033_c0_g1	27.5008	-0.179078	0.247792	-0.722692	0.469869	0.815611
PC10033_c0_g2	35.371	-0.0789754	0.194897	-0.405216	0.685319	0.902219
PC10033_c1_g1	214.81	-0.0757564	0.143512	-0.527876	0.597585	0.86541
PC10034_c0_g1	21.8054	0.249713	0.293111	0.85194	0.394248	0.780654
PC10034_c1_g1	127.671	-0.341744	0.151381	-2.25751	0.0239761	0.336484
PC10035_c0_g2	10.7562	1.06282	0.394658	2.69301	0.00708093
PC10036_c0_g1	1141.3	0.115441	0.219645	0.52558	0.59918	0.866552
PC10039_c2_g1	7.42644	-0.697153	0.42165	-1.65339	0.0982511
PC1004_c0_g1	159.33	0.228528	0.25452	0.897879	0.36925	0.770697
PC10040_c0_g1	34.863	0.173789	0.927302	0.187414	0.851336	0.95782
PC10042_c0_g1	12.317	-0.0335953	0.825616	-0.0406912	0.967542
PC10042_c0_g3	4.5006	-0.941378	1.15325	-0.816286	0.414337
PC10042_c0_g4	14.4679	1.56193	0.753738	2.07225	0.0382425
PC10043_c0_g1	1222.67	0.327504	0.191283	1.71214	0.0868702	0.537106
PC10044_c0_g1	10.9058	0.183447	0.364779	0.502899	0.615035
PC10045_c0_g1	35.6165	-0.0841549	0.18761	-0.448562	0.653747	0.891935
PC10047_c0_g1	40.2558	0.138109	0.167009	0.826952	0.408264	0.786814
PC10047_c0_g5	13.178	0.241171	0.288828	0.834996	0.40372
PC10048_c0_g1	10.986	0.122709	0.365466	0.335761	0.737051
PC10048_c1_g1	31.7708	-0.395541	0.575642	-0.68713	0.492001	0.825592
PC10048_c2_g2	5.81847	-0.353785	0.384297	-0.920604	0.357257
PC10048_c4_g1	13.0988	-0.0693313	0.323392	-0.214388	0.830245
PC10048_c7_g1	9.14808	-0.146766	0.417189	-0.351798	0.72499
PC1005_c0_g1	451.407	-0.113731	0.0981153	-1.15916	0.246392	0.712791
PC10050_c0_g1	160.861	-0.0986268	0.177095	-0.556914	0.577586	0.858391
PC10050_c1_g1	303.782	-0.184472	0.306842	-0.601195	0.54771	0.847624
PC10055_c0_g1	12.6232	-0.44481	0.3653	-1.21766	0.223355
PC10055_c2_g1	8.12091	0.489291	0.46573	1.05059	0.293447
PC10055_c2_g2	14.583	0.109981	0.315788	0.348275	0.727634
PC10058_c0_g1	15.5367	0.575124	0.512072	1.12313	0.261382
PC1006_c0_g1	288.819	-0.328661	0.243822	-1.34795	0.177674	0.654855
PC1006_c0_g3	68.3155	0.190826	0.323758	0.589409	0.555587	0.851336
PC10064_c0_g1	426.689	-0.0610531	0.197774	-0.308701	0.757549	0.927943
PC10065_c0_g1	707.755	-0.278422	0.212074	-1.31285	0.189232	0.667472
PC10066_c0_g1	7987.09	0.181121	0.139776	1.2958	0.195046	0.673141
PC10067_c0_g1	206.555	0.157939	0.465682	0.339156	0.734492	0.9197
PC10067_c0_g2	24.7434	-0.415605	1.32442	-0.313801	0.753672	0.925925
PC10067_c1_g1	9.42412	-0.215846	0.4381	-0.492687	0.622234
PC10068_c0_g1	694.611	0.113096	0.18002	0.628244	0.529844	0.840994
PC10068_c1_g1	123.049	-0.272176	0.187586	-1.45094	0.146798	0.626386
PC10069_c0_g1	32.847	-0.107701	0.284879	-0.37806	0.705386	0.909046
PC10069_c0_g2	10.273	-0.701576	0.39276	-1.78627	0.0740552
PC1007_c0_g1	722.01	-0.0212242	0.124605	-0.170331	0.86475	0.962016
PC10070_c0_g1	27.3996	-0.714385	0.338108	-2.11289	0.0346104	0.381872
PC10070_c0_g2	29.2632	-0.257123	0.399388	-0.643792	0.51971	0.835578
PC10072_c0_g1	318.208	-0.15368	0.15247	-1.00794	0.313485	0.746309
PC10073_c0_g1	6.36567	-0.164096	0.404626	-0.405548	0.685074
PC10074_c0_g1	53.8179	-0.271793	0.226403	-1.20048	0.229951	0.702303
PC10076_c0_g1	27.7844	-0.0776062	0.299448	-0.259164	0.795509	0.941879
PC1008_c0_g1	168.343	0.474309	0.266481	1.7799	0.0750924	0.513123
PC10082_c0_g1	215.671	-0.0915829	0.159044	-0.575834	0.564728	0.854452
PC10082_c1_g1	3569.37	-0.552872	0.280676	-1.96979	0.0488624	0.436553
PC10084_c0_g1	36.0899	0.229403	0.18019	1.27312	0.202976	0.679044
PC10087_c0_g1	7284.87	0.253937	0.352009	0.721394	0.470667	0.815758
PC10089_c2_g1	16.264	0.136744	0.476345	0.28707	0.774059
PC1009_c0_g1	756.77	-0.23103	0.111723	-2.06787	0.0386524	0.399624
PC1009_c0_g2	13.979	-0.630044	0.336141	-1.87434	0.0608832
PC1009_c1_g1	11.2306	0.0110523	0.387888	0.0284936	0.977268
PC1009_c1_g2	6.64902	1.24183	0.710458	1.74793	0.0804769
PC10090_c0_g1	146.258	-0.320094	0.208766	-1.53327	0.125211	0.599282
PC10091_c0_g1	180.933	0.0387229	0.118464	0.326875	0.743763	0.923198
PC10092_c0_g1	7.26921	-0.00049305	0.400045	-0.00123248	0.999017
PC10092_c1_g1	37.0554	0.0472403	0.217065	0.217632	0.827716	0.95124
PC10093_c0_g1	36.4441	0.173083	0.603051	0.287012	0.774103	0.933738
PC100944_c0_g1	8.0388	-0.312619	0.457361	-0.683529	0.494273
PC10095_c0_g1	15.326	-0.164366	0.304384	-0.539995	0.589201
PC10096_c0_g1	213.828	0.191934	0.218251	0.879417	0.379175	0.771786
PC101_c0_g2	380.416	-0.415022	0.180006	-2.30559	0.0211333	0.318994
PC4257_c0_g2	88.126	-3.51377	0.418725	-8.3916	4.79586e-17	8.54575e-13
PC101_c1_g1	201.368	-0.0503974	0.18892	-0.266765	0.78965	0.93974
PC101_c3_g1	179.457	0.378637	0.200686	1.88671	0.0591992	0.471265
PC1010_c0_g1	1074.98	0.0415734	0.144248	0.288207	0.773188	0.933692
PC10101_c3_g1	12.1242	0.555688	0.349258	1.59106	0.111597
PC10102_c0_g1	1099.62	0.240517	0.117686	2.04372	0.0409816	0.40876
PC10104_c0_g1	87.2745	-0.456908	0.288399	-1.58429	0.113128	0.586793
PC10107_c0_g2	7.36964	-0.665384	0.385699	-1.72514	0.0845025
PC10107_c1_g1	8.69824	0.801246	0.474669	1.68801	0.0914095
PC10108_c0_g1	7.82232	0.140802	0.495849	0.283961	0.776441
PC10109_c0_g1	5.47232	0.681457	0.737683	0.92378	0.355601
PC1011_c1_g1	15.4552	0.502635	0.370644	1.35611	0.175064
PC10110_c0_g1	25.4088	-0.0833381	0.428725	-0.194386	0.845874	0.956478
PC10110_c0_g2	15.9584	0.148064	0.484792	0.305417	0.760049
PC10110_c0_g3	25.4953	-0.628558	0.243396	-2.58245	0.00981017	0.2284
PC10113_c0_g1	21.4861	-0.17714	0.337547	-0.524786	0.599732	0.866717
PC10113_c0_g2	855.771	0.00671925	0.110584	0.0607614	0.951549	0.985576
PC10114_c0_g1	509.465	-0.19594	0.299703	-0.653783	0.513252	0.833535
PC10115_c0_g2	14.9086	-0.279578	0.267855	-1.04376	0.296595
PC10117_c0_g1	15.8801	0.574136	0.483843	1.18662	0.235378
PC10118_c0_g1	11.9299	0.462023	0.370956	1.24549	0.212951
PC10119_c0_g1	118.178	0.41184	0.153559	2.68197	0.00731906	0.200953
PC1012_c0_g1	58.9018	-0.284434	0.168218	-1.69086	0.0908635	0.544459
PC1012_c0_g2	20.5394	-0.381118	0.277225	-1.37476	0.169206	0.647703
PC1012_c1_g1	25.5023	0.492128	0.231313	2.12754	0.033375	0.377354
PC10124_c0_g1	447.954	0.277692	0.22391	1.24019	0.214904	0.69026
PC10125_c0_g1	121.141	-0.159236	0.577036	-0.275955	0.782583	0.93673
PC10127_c0_g1	718.147	-0.00466219	0.110673	-0.0421258	0.966398	0.990344
PC10128_c0_g1	49.0145	-0.420106	0.231528	-1.81449	0.0696019	0.498672
PC10129_c0_g1	1028.51	0.464759	0.383369	1.2123	0.225397	0.698666
PC1013_c0_g1	253.819	-0.281835	0.182488	-1.5444	0.122492	0.595196
PC1013_c3_g1	10.5527	-0.23586	0.343469	-0.686701	0.492271
PC10131_c0_g1	15.0069	0.467366	0.288381	1.62065	0.105092
PC10133_c0_g1	726.243	-0.461733	0.276646	-1.66904	0.0951099	0.555113
PC10134_c0_g2	8.35814	0.484133	0.482539	1.0033	0.315714
PC10135_c0_g1	190.855	0.0918375	0.235677	0.389674	0.696777	0.905601
PC10137_c0_g3	9.60294	0.700415	0.446837	1.56749	0.116999
PC1014_c0_g1	262.077	0.0516264	0.0904407	0.570831	0.568114	0.855019
PC10140_c0_g1	76.1009	-0.196472	0.209183	-0.939235	0.34761	0.760286
PC10142_c0_g1	30.6374	-0.551085	0.324611	-1.69768	0.0895683	0.542324
PC10143_c0_g1	524.379	-0.108596	0.272998	-0.397788	0.690786	0.903236
PC10145_c0_g1	4.72053	0.253741	0.75626	0.335521	0.737232
PC10146_c0_g2	7.31445	0.184076	0.410481	0.44844	0.653836
PC1015_c0_g1	2180.27	-0.5935	0.444072	-1.3365	0.181387	0.65962
PC10151_c0_g1	11.7565	-0.860357	0.596978	-1.44119	0.149531
PC101524_c0_g1	1.38587	2.26852	1.52215	1.49033	0.136136
PC101546_c0_g1	5.53592	-0.102124	0.403887	-0.252852	0.800382
PC10155_c0_g1	8.43055	-0.227125	0.3496	-0.649672	0.515904
PC10158_c0_g1	14.2137	-0.0421855	0.330846	-0.127508	0.898538
PC10159_c0_g1	67.4785	0.363397	0.232527	1.56282	0.118096	0.591942
PC1016_c0_g1	289.581	-0.0784602	0.207664	-0.377824	0.705562	0.909086
PC10162_c0_g1	1024.28	0.230498	0.28407	0.811413	0.417129	0.791146
PC10163_c0_g1	43.3893	-0.0461487	0.187222	-0.246492	0.805301	0.945453
PC10164_c0_g1	49.3224	0.130101	0.284833	0.45676	0.647843	0.889826
PC10165_c0_g1	34.802	-0.0246295	0.285555	-0.0862514	0.931267	0.98021
PC10166_c0_g1	900.61	0.238267	0.126464	1.88406	0.0595566	0.471265
PC10168_c0_g2	30.1531	-0.35964	0.386576	-0.930323	0.352204	0.763665
PC10168_c0_g3	132.692	0.077976	0.226185	0.344745	0.730286	0.917635
PC10169_c0_g1	129.244	-0.360992	0.147714	-2.44386	0.0145312	0.271457
PC1017_c0_g1	7.6934	-0.568175	0.3862	-1.4712	0.141238
PC1017_c1_g1	142.297	-0.318698	0.169224	-1.8833	0.0596602	0.471435
PC10170_c0_g1	358.492	-0.304514	0.148475	-2.05095	0.040272	0.405886
PC10170_c1_g1	52.6722	0.0157287	0.383052	0.0410615	0.967247	0.990703
PC10173_c0_g1	157.029	0.208373	0.178389	1.16808	0.242773	0.711159
PC10174_c0_g1	413.801	-0.143163	0.192722	-0.742845	0.457576	0.811973
PC10175_c0_g1	34.349	0.538179	0.458632	1.17345	0.240617	0.710387
PC10176_c0_g1	132.775	0.178219	0.209482	0.85076	0.394903	0.781266
PC10179_c0_g1	12.7931	0.788897	0.297974	2.64754	0.00810793
PC10179_c0_g3	1060.77	0.0280719	0.145174	0.193367	0.846671	0.956709
PC1018_c0_g1	2932.63	0.298953	0.726764	0.411348	0.680817	0.900964
PC10180_c0_g3	8.12094	-0.0525411	0.400914	-0.131053	0.895733
PC10180_c1_g1	13.1881	-0.200941	0.295738	-0.679456	0.496849
PC10181_c0_g1	1362.48	-0.108326	0.223433	-0.484826	0.6278	0.880416
PC10183_c0_g1	408.821	0.56092	0.519586	1.07955	0.280342	0.73288
PC10185_c0_g1	13.2617	-1.62806	1.64995	-0.986731	0.323774
PC10185_c0_g2	41.399	-0.101554	0.244386	-0.415547	0.677742	0.900603
PC10185_c0_g4	20.1459	-1.16619	0.967396	-1.2055	0.228012	0.700871
PC10186_c0_g1	20.4952	-0.167303	0.281645	-0.594022	0.552497	0.849655
PC10187_c0_g1	6.64655	-0.125578	0.402319	-0.312134	0.754938
PC1019_c0_g1	547.665	0.284301	0.134915	2.10725	0.0350955	0.383997
PC1019_c0_g2	478.184	0.162703	0.24365	0.667774	0.504278	0.830475
PC1019_c1_g1	364.303	0.0261222	0.0822579	0.317564	0.750815	0.924728
PC1019_c3_g1	567.202	-0.0621106	0.161143	-0.385437	0.699914	0.906803
PC1019_c8_g1	6.52079	0.144519	0.498572	0.289866	0.771919
PC10190_c0_g1	27.4328	-0.847468	0.644363	-1.3152	0.188442	0.666769
PC10191_c0_g1	82.2467	-0.570453	0.211008	-2.70346	0.00686219	0.193989
PC10192_c0_g1	264.408	0.217579	0.515786	0.421841	0.673141	0.898547
PC10196_c0_g1	28.9128	-0.0255367	0.599666	-0.042585	0.966032	0.990195
PC10199_c0_g1	8.91597	-0.249107	0.342522	-0.727272	0.467059
PC10199_c1_g1	4.99652	0.01691	0.416198	0.0406296	0.967591
PC102_c0_g1	25.1628	0.144205	0.267637	0.53881	0.590018	0.862767
PC1020_c0_g1	198.643	0.134172	0.350173	0.383158	0.701603	0.90741
PC1020_c0_g2	7288.79	0.301684	0.180269	1.67352	0.094224	0.552841
PC10200_c1_g1	25.7687	-0.635999	0.367676	-1.72978	0.0836694	0.529239
PC10203_c0_g1	631.779	-0.0275323	0.163178	-0.168725	0.866013	0.962362
PC10206_c0_g1	19751.8	0.0244602	0.401874	0.0608654	0.951466	0.985576
PC10208_c0_g1	624.694	0.262135	0.124346	2.10811	0.0350217	0.383997
PC10209_c0_g1	212.928	0.361839	0.275056	1.31551	0.188338	0.666769
PC1021_c0_g1	141.48	-0.202513	0.363478	-0.557151	0.577424	0.858391
PC1021_c1_g1	892.025	-0.64931	0.280589	-2.31409	0.0206626	0.31878
PC10210_c0_g1	40.2927	-0.0180553	0.295774	-0.0610442	0.951324	0.985576
PC10211_c0_g1	26168.9	0.635671	0.988837	0.642847	0.520323	0.836054
PC10211_c0_g2	958.428	1.19968	0.66275	1.81015	0.0702721	0.500292
PC10212_c1_g1	8.18009	-0.741003	0.778348	-0.95202	0.341087
PC10213_c1_g4	26.8463	-0.129787	0.429955	-0.301862	0.762757	0.929528
PC10213_c4_g1	12.8295	-0.578698	0.298158	-1.94091	0.0522696
PC10215_c0_g1	61.1024	-0.240953	0.259025	-0.930231	0.352251	0.763665
PC10215_c0_g2	8.97444	-0.343042	0.357522	-0.959496	0.337309
PC10216_c0_g1	273.145	0.159984	0.105701	1.51355	0.13014	0.607164
PC10217_c0_g1	82.3103	-0.1466	0.164518	-0.891086	0.372883	0.771176
PC10218_c0_g1	27.8349	0.430423	0.459763	0.936184	0.349178	0.761414
PC1022_c0_g1	162.527	-0.315208	0.185161	-1.70235	0.0886904	0.54141
PC1022_c0_g3	414.117	-0.224581	0.194514	-1.15458	0.248262	0.714398
PC10220_c0_g1	8.58225	-0.00120475	0.536189	-0.00224688	0.998207
PC10220_c0_g2	471.947	-0.182114	0.166248	-1.09543	0.273326	0.72864
PC10220_c1_g1	4.31919	-1.11828	0.667256	-1.67595	0.093749
PC10220_c1_g4	5.50922	-1.38701	0.815853	-1.70007	0.089118
PC10221_c0_g1	104.452	0.0929012	0.498726	0.186277	0.852228	0.958158
PC10222_c0_g1	28.1175	-0.8071	0.641388	-1.25836	0.20826	0.684768
PC10224_c0_g1	8.2968	0.46155	0.516505	0.893601	0.371535
PC10224_c3_g1	3.93391	0.248805	0.798679	0.311521	0.755405
PC10225_c0_g1	5.89019	-0.510571	0.478325	-1.06741	0.285786
PC10225_c0_g2	16.5361	0.237227	0.599583	0.395654	0.692361
PC10225_c1_g1	16.1724	0.744781	0.673606	1.10566	0.268872
PC10225_c1_g3	5.26027	0.640729	0.457589	1.40023	0.161445
PC10226_c0_g1	15.0633	-0.306212	0.342238	-0.894732	0.37093
PC10227_c0_g1	70.3015	0.204008	0.22808	0.894461	0.371076	0.771176
PC10228_c0_g1	6.34339	-1.14999	0.691052	-1.66412	0.096089
PC10229_c0_g1	28.8876	-0.640532	0.288381	-2.22113	0.0263419	0.345901
PC1023_c0_g2	292.166	-0.0921834	0.163824	-0.562696	0.573642	0.857694
PC1023_c0_g3	114.534	0.153068	0.203037	0.753892	0.450914	0.808657
PC1023_c1_g1	44.1028	-0.470288	0.193029	-2.43637	0.0148357	0.274514
PC1023_c3_g1	38.9969	-0.0690653	0.305349	-0.226185	0.821058	0.950302
PC10230_c1_g1	10.395	-0.138243	0.767055	-0.180226	0.856975
PC10231_c0_g1	63.4163	0.321031	0.324628	0.988919	0.322703	0.750782
PC10231_c0_g3	6.79836	-0.276642	0.406235	-0.68099	0.495878
PC10232_c0_g1	111.86	0.175679	0.389496	0.451042	0.651959	0.891578
PC45668_c0_g1	32.1981	-3.338	0.827308	-4.03477	5.46553e-05	0.0135526
PC10234_c0_g1	27.3049	-0.43846	0.200536	-2.18644	0.0287834	0.358165
PC10234_c1_g1	13.7939	0.808979	0.699934	1.15579	0.247766
PC10234_c2_g2	8.54035	-0.526153	0.627943	-0.8379	0.402087
PC10235_c0_g1	85.2081	-0.117466	0.184923	-0.635218	0.525286	0.838542
PC10235_c0_g2	42.7393	-0.274339	0.164708	-1.66561	0.0957917	0.555755
PC10236_c0_g1	16.3359	0.623518	0.338852	1.84009	0.0657548
PC10237_c0_g1	15.8585	-0.58486	0.339519	-1.72261	0.0849583
PC10238_c0_g1	5.20763	0.0173173	0.567329	0.0305242	0.975649
PC10238_c1_g1	6.02895	0.833293	0.395585	2.10648	0.0351624
PC10239_c0_g1	27.5338	-0.671682	0.288064	-2.33171	0.0197157	0.311722
PC1024_c0_g1	194.784	0.332839	0.166398	2.00026	0.0454722	0.424002
PC10240_c0_g1	71.0654	1.27563	0.519427	2.45584	0.0140556	0.26871
PC10241_c0_g1	55.7146	-0.0951819	0.286853	-0.331814	0.74003	0.922192
PC10242_c0_g1	4.65251	-0.589524	0.574526	-1.0261	0.304842
PC10243_c0_g1	528.691	0.232927	0.113511	2.05203	0.0401672	0.405856
PC10244_c0_g1	14.9832	-0.485369	0.466596	-1.04023	0.298231
PC10244_c0_g2	668.255	0.342147	0.150982	2.26614	0.0234426	0.332697
PC10245_c0_g1	79.5307	-0.486172	0.43635	-1.11418	0.265202	0.724635
PC10246_c0_g1	24.0976	0.213974	0.287847	0.743358	0.457265	0.811868
PC102499_c0_g1	29.5534	2.56862	1.91131	1.3439
PC1025_c0_g1	305.067	-0.250973	0.260137	-0.964774	0.334658	0.753621
PC1025_c1_g1	369.762	-0.111639	0.186775	-0.597716	0.550029	0.848016
PC1025_c1_g2	226.713	0.0234238	0.273096	0.0857713	0.931648	0.980322
PC1025_c2_g1	137.397	-0.588716	0.365487	-1.61077	0.10723	0.578306
PC1025_c3_g1	24.5931	-0.428924	0.336839	-1.27338	0.202884	0.679044
PC1025_c6_g1	4.8994	-0.956191	0.507173	-1.88533	0.0593849
PC10250_c0_g1	44.4192	-0.16908	0.207747	-0.813874	0.415717	0.790066
PC10250_c1_g1	922.707	-0.0449268	0.140635	-0.319456	0.749381	0.92423
PC10251_c0_g2	24.4507	-0.0483112	0.23599	-0.204717	0.837793	0.954255
PC10251_c1_g2	16.9127	-0.385557	0.504355	-0.764455	0.444596
PC10251_c2_g1	17.0636	-0.0154527	0.374743	-0.0412355	0.967108
PC10251_c3_g1	7.21706	-0.00447769	0.467975	-0.00956823	0.992366
PC10253_c0_g1	203.963	0.445017	0.379989	1.17113	0.241546	0.710421
PC10254_c0_g1	20.8259	0.0154323	0.286113	0.0539379	0.956985	0.986948
PC10256_c3_g1	4.90289	0.967188	0.459402	2.10532	0.0352635
PC10257_c0_g1	252.723	0.0577263	0.214267	0.269413	0.787612	0.938921
PC10259_c0_g3	25.516	0.550626	0.31834	1.72968	0.0836877	0.529239
PC1026_c0_g1	4915.25	-0.159035	0.178247	-0.892217	0.372277	0.771176
PC10260_c0_g2	134.621	0.0389809	0.207187	0.188143	0.850764	0.957692
PC10261_c0_g1	12.1495	0.66503	0.430129	1.54612	0.122076
PC10262_c0_g1	209.734	0.749871	0.397766	1.8852	0.0594023	0.471265
PC10262_c0_g2	5.12156	-0.374843	0.51907	-0.722144	0.470206
PC10263_c0_g1	76.8935	0.256799	0.216963	1.18361	0.236568	0.707652
PC10263_c2_g1	17.3216	0.395481	0.265965	1.48696	0.137024
PC10263_c3_g1	13.3147	-0.0397079	0.489424	-0.0811318	0.935337
PC10263_c6_g1	7.05501	-0.575187	0.424181	-1.35599	0.175101
PC10264_c0_g1	21.9075	0.348971	0.421855	0.827228	0.408108	0.786814
PC10265_c1_g1	44.1432	-0.450796	0.336561	-1.33942	0.180434	0.657965
PC10266_c0_g2	14.4165	0.59507	0.532802	1.11687	0.264051
PC10267_c1_g1	2413.98	-0.105565	0.1194	-0.884132	0.376625	0.771333
PC10269_c0_g1	32.4735	0.285423	0.320484	0.890602	0.373143	0.771176
PC1027_c0_g1	87.2882	0.228363	0.25878	0.88246	0.377528	0.771333
PC1027_c0_g2	39.8075	0.180236	0.329083	0.547692	0.583904	0.859812
PC1027_c1_g1	528.331	-0.271353	0.266916	-1.01662	0.309334	0.74485
PC1027_c1_g3	452.997	0.0520082	0.423174	0.1229	0.902186	0.972651
PC1027_c2_g1	34.5315	0.622758	0.431378	1.44365	0.148838	0.628337
PC1027_c2_g2	202.986	0.38688	0.419571	0.922084	0.356485	0.766248
PC10270_c0_g1	37.684	-1.21322	0.551477	-2.19994	0.0278108	0.352443
PC10273_c0_g1	1388.49	-0.159647	0.108524	-1.47107	0.141271	0.621416
PC10273_c1_g1	407.103	-0.0453	0.281277	-0.161051	0.872053	0.964503
PC10274_c0_g1	12.481	-0.381155	0.593083	-0.642668	0.52044
PC10276_c0_g1	327.696	-0.653541	0.496806	-1.31548	0.188347	0.666769
PC26868_c0_g2	61.1502	-3.0745	0.939241	-3.27339	0.00106267	0.0717259
PC10277_c0_g2	8.6105	-0.327467	0.44666	-0.733147	0.463469
PC10278_c0_g1	7.35339	-0.472123	0.437781	-1.07844	0.280835
PC10278_c1_g1	11.1838	0.0874342	0.570552	0.153245	0.878205
PC10279_c1_g1	6.54917	0.147121	0.452662	0.325012	0.745172
PC1028_c0_g1	258.401	-0.0876579	0.175075	-0.500687	0.616592	0.875253
PC1028_c0_g2	274.497	-0.327861	0.243106	-1.34864	0.177454	0.654793
PC1028_c0_g3	27.8131	0.129751	0.230012	0.564105	0.572683	0.857331
PC1028_c1_g1	43.4084	-0.718501	0.317236	-2.26488	0.0235203	0.333274
PC10280_c0_g2	14.9906	-0.536675	0.38828	-1.38219	0.166915
PC10281_c3_g1	23.5005	0.650781	0.345178	1.88535	0.0593829	0.471265
PC10282_c0_g1	37.2972	0.264913	0.227466	1.16463	0.24417	0.712237
PC10283_c0_g1	78.234	0.165984	0.155251	1.06913	0.28501	0.736373
PC10283_c0_g2	6.13204	0.0865372	0.395764	0.218659	0.826916
PC10283_c0_g3	125.233	0.971417	0.921647	1.054	0.291882	0.738858
PC10285_c0_g1	200.361	0.263958	0.161348	1.63596	0.101848	0.56589
PC10287_c0_g1	83.1989	-0.0263998	0.254741	-0.103634	0.91746	0.976419
PC10287_c1_g1	593.653	-0.179895	0.138111	-1.30254	0.192732	0.670827
PC10288_c0_g1	89.4374	-0.488785	0.389172	-1.25596	0.209131	0.685396
PC1029_c0_g1	678.875	-0.711977	0.368598	-1.93158	0.0534117	0.452349
PC10290_c0_g1	17.073	0.20445	0.311258	0.656849	0.511278
PC10290_c1_g1	15.5245	-0.177464	0.283764	-0.625391	0.531714
PC10290_c1_g2	25.7883	-0.641637	0.236381	-2.71442	0.00663924	0.1902
PC10290_c2_g1	38.5337	0.297085	0.249256	1.19189	0.233305	0.705325
PC10291_c0_g1	6.0666	1.17138	0.48035	2.4386	0.0147443
PC10295_c0_g3	250.975	-0.02718	0.195849	-0.13878	0.889624	0.968251
PC10296_c0_g1	20.8171	-0.375794	0.547468	-0.686422	0.492447	0.825691
PC10298_c0_g2	7.7838	0.461569	0.448374	1.02943	0.303279
PC103_c0_g1	161.665	-0.0150467	0.206391	-0.0729039	0.941883	0.983234
PC103_c1_g1	46.4595	-0.32803	0.295821	-1.10888	0.267483	0.726291
PC1030_c0_g1	122.648	0.0647621	0.199323	0.324911	0.745249	0.92354
PC10301_c0_g1	31.6191	-0.224197	0.323556	-0.692916	0.488362	0.824533
PC10301_c1_g1	18.2572	-0.0981922	0.458055	-0.214368	0.83026	0.95152
PC10301_c4_g1	4.45565	-1.28554	1.7427	-0.737673	0.460713
PC10304_c0_g1	257.571	-0.387782	0.213086	-1.81983	0.0687842	0.496422
PC10305_c0_g2	4.80027	-0.478856	0.64196	-0.745928	0.455711
PC10308_c1_g1	16.0503	0.311559	0.457395	0.681161	0.49577
PC1031_c0_g1	291.561	-0.0200321	0.13287	-0.150765	0.880161	0.96645
PC1031_c0_g2	302.066	-0.0460252	0.254693	-0.180708	0.856596	0.959377
PC1031_c1_g1	12.095	0.00282781	0.404731	0.00698688	0.994425
PC10310_c0_g1	20.43	-0.251196	0.5233	-0.480022	0.631212	0.881717
PC10311_c0_g1	3.41406	-0.0428926	0.574176	-0.0747028	0.940451
PC10312_c0_g2	43.2304	-0.186516	0.248179	-0.751539	0.452329	0.808715
PC10313_c0_g1	10.2599	-0.200117	0.329418	-0.607486	0.543528
PC10313_c0_g2	7.02385	-0.715594	0.486015	-1.47237	0.140921
PC10313_c0_g3	483.782	-0.165046	0.416846	-0.395941	0.692149	0.903236
PC10313_c0_g4	128.529	-0.720311	0.606443	-1.18776	0.234926	0.706631
PC10315_c0_g1	8.17988	0.276906	0.495912	0.558378	0.576586
PC10315_c0_g2	38.9585	-0.0792709	0.251522	-0.315165	0.752636	0.925737
PC10318_c1_g1	45.1763	-0.454012	0.36014	-1.26065	0.207434	0.684094
PC10319_c0_g1	3169.37	0.0615573	0.143623	0.428603	0.668212	0.896668
PC1032_c0_g1	137.923	-0.191333	0.168565	-1.13507	0.256347	0.72027
PC1032_c0_g2	819.66	-0.128066	0.104348	-1.22729	0.219713	0.69428
PC1032_c0_g3	192.097	-0.166333	0.104754	-1.58784	0.112321	0.585301
PC1032_c1_g1	22.8758	0.00870672	0.255346	0.0340978	0.972799	0.992299
PC1032_c2_g1	54.7976	-0.290418	0.175806	-1.65193	0.0985493	0.560897
PC42550_c0_g1	23.6463	-2.54013	0.749787	-3.3878	0.000704563	0.0583935
PC1032_c4_g1	10.7719	-0.215982	0.531672	-0.406231	0.684573
PC1032_c5_g1	19.4473	0.471951	0.331532	1.42354	0.154578	0.633294
PC1032_c5_g2	34.8994	-0.35914	0.279571	-1.28461	0.198928	0.674998
PC1032_c6_g1	18.063	0.911457	0.393042	2.31898	0.020396
PC1032_c7_g1	215.27	0.18631	0.150994	1.23389	0.217244	0.692144
PC1032_c8_g1	29.6225	-0.0343743	0.265332	-0.129552	0.896921	0.970915
PC10321_c0_g1	30.4239	-0.0783809	0.253165	-0.309604	0.756862	0.927764
PC10322_c1_g1	9.72427	0.256739	0.708064	0.362593	0.716909
PC10323_c1_g3	8.03099	0.0433399	0.380513	0.113899	0.909318
PC10324_c0_g1	36.8858	0.23006	0.219901	1.0462	0.295468	0.740617
PC10324_c2_g1	16.0043	0.0842383	0.960377	0.0877138	0.930104
PC10325_c0_g1	90.9559	-0.32359	0.157409	-2.05572	0.0398092	0.404318
PC10325_c1_g1	154.092	0.326179	0.398648	0.818213	0.413236	0.789246
PC10326_c3_g1	34.9354	-0.0848559	0.306214	-0.277113	0.781693	0.93673
PC10326_c3_g2	19.7404	-0.223189	0.286088	-0.780142	0.435307	0.801234
PC10327_c0_g1	105.148	0.635855	0.221906	2.86542	0.00416453	0.146078
PC10327_c1_g1	24.5255	-0.314628	0.261774	-1.20191	0.2294	0.701944
PC10328_c0_g1	401.202	0.14772	0.118272	1.24899	0.211668	0.688383
PC1033_c0_g1	41104	0.0516553	0.336202	0.153644	0.877891	0.965874
PC1033_c0_g2	357.725	-0.0919343	0.417159	-0.220382	0.825574	0.950732
PC1033_c4_g1	6764.55	0.728072	0.383015	1.90089	0.0573159	0.464942
PC10331_c0_g1	95.7753	-0.207118	0.241993	-0.855883	0.392062	0.779077
PC10333_c0_g1	7.10867	-0.307073	0.53968	-0.568991	0.569362
PC10334_c0_g1	1602.62	-0.0470123	0.109412	-0.42968	0.667429	0.89636
PC10338_c0_g1	258.827	-0.0597991	0.127706	-0.468256	0.639602	0.885813
PC1034_c0_g1	257.234	0.429331	0.214325	2.00318	0.0451576	0.42373
PC10340_c0_g2	490.675	0.503167	0.396879	1.26781	0.204866	0.680928
PC10341_c0_g1	7.49174	-0.965839	0.558273	-1.73005	0.0836219
PC10342_c0_g1	4.9436	0.732615	0.585258	1.25178	0.210649
PC10345_c0_g1	66.5018	-0.148897	0.188398	-0.790333	0.429333	0.797849
PC10346_c0_g1	36.9394	0.177518	0.400357	0.443399	0.657477	0.892522
PC10346_c0_g2	46.7712	0.0134726	0.200561	0.0671747	0.946443	0.984394
PC10347_c0_g1	303.242	0.105589	0.134084	0.787478	0.431002	0.798754
PC10351_c0_g1	42.4033	0.350741	0.359001	0.976992	0.328573	0.752816
PC10351_c0_g2	8.24199	0.130985	0.358727	0.365139	0.715008
PC10351_c1_g1	14.3004	0.216065	0.290913	0.742714	0.457655
PC10351_c2_g1	305.879	-0.14366	0.152712	-0.940723	0.346847	0.760062
PC10354_c2_g2	31.4149	-0.209274	0.206958	-1.01119	0.311923	0.74569
PC10355_c0_g1	860.798	-0.273769	0.13439	-2.03713	0.0416372	0.412055
PC10356_c0_g1	39.6947	-0.208541	0.256043	-0.814475	0.415373	0.789965
PC10356_c0_g2	9.03174	-0.485749	0.428221	-1.13434	0.256651
PC10358_c0_g1	394.679	0.27257	0.188322	1.44736	0.147796	0.627241
PC10359_c0_g1	940.349	-0.0278657	0.123883	-0.224936	0.822029	0.950302
PC1036_c0_g1	392.557	0.181141	0.0874102	2.07231	0.0382367	0.397259
PC10360_c0_g1	104.944	-0.290528	0.262795	-1.10553	0.26893	0.726291
PC10361_c0_g1	23.7201	-0.370068	0.307162	-1.2048	0.22828	0.70097
PC10362_c0_g1	6.75578	0.663675	0.686708	0.966459	0.333815
PC10363_c0_g1	15.4388	0.14452	0.28084	0.514599	0.606833
PC10364_c0_g1	235.011	-0.0596565	0.251335	-0.237358	0.812379	0.947058
PC1037_c0_g1	353.83	-0.354048	0.256907	-1.37811	0.168168	0.646789
PC10370_c0_g2	183.53	0.248005	0.241478	1.02703	0.304406	0.743526
PC10370_c1_g1	13.7877	-0.525555	0.293135	-1.79288	0.0729927
PC10371_c0_g1	7.70657	0.234947	0.385834	0.608931	0.54257
PC10373_c0_g3	17.6709	0.09039	0.664115	0.136106	0.891738
PC10374_c0_g1	15.2299	0.343425	0.65835	0.521645	0.601918
PC10375_c1_g1	6.10194	0.216949	0.507093	0.42783	0.668775
PC10376_c0_g1	9.15565	0.408471	0.571023	0.715332	0.474404
PC10379_c0_g1	6.73432	0.669377	0.371048	1.80402	0.0712286
PC1038_c0_g2	52.4622	0.144752	0.249423	0.580348	0.56168	0.853974
PC1038_c1_g1	538.205	0.0980437	0.152834	0.641503	0.521196	0.836074
PC1038_c2_g1	661.464	0.0980125	0.103006	0.951523	0.341339	0.756496
PC1038_c2_g2	134.705	-0.0323	0.191696	-0.168496	0.866193	0.96242
PC1038_c2_g3	46.5439	0.0644036	0.329642	0.195374	0.8451	0.956222
PC1038_c27_g1	100.963	-0.21331	0.142463	-1.49729	0.134317	0.612276
PC1038_c3_g1	2239.3	0.120039	0.599108	0.200363	0.841196	0.955016
PC1038_c4_g1	88.4454	-0.26872	0.170924	-1.57216	0.115913	0.589457
PC1038_c5_g1	16.504	0.00973936	0.288884	0.0337137	0.973105
PC1038_c6_g1	40.0424	0.00579577	0.18575	0.031202	0.975108	0.992628
PC10380_c0_g1	11.4675	-0.415211	0.39005	-1.06451	0.2871
PC10380_c0_g2	435.235	-0.108119	0.287291	-0.376339	0.706665	0.909313
PC10383_c0_g1	26.7448	-0.567889	0.418412	-1.35725	0.174702	0.652288
PC10383_c1_g2	18.7008	-0.670802	0.573576	-1.16951	0.242198	0.710838
PC10383_c2_g1	8.47987	-0.299746	0.341737	-0.877127	0.380418
PC10384_c0_g1	11.6317	-0.145699	0.337448	-0.431768	0.66591
PC10385_c0_g1	11.2424	-0.0296743	0.308239	-0.0962704	0.923306
PC10386_c0_g1	42.7826	0.892146	0.577092	1.54593	0.12212	0.595196
PC10388_c0_g1	23.6495	0.483422	0.241989	1.9977	0.0457493	0.424839
PC10390_c0_g1	36.1428	0.00713107	0.394641	0.0180698	0.985583	0.995471
PC10391_c0_g1	13.375	-0.246881	0.354135	-0.697139	0.485716
PC10392_c0_g1	5.23744	-0.191887	0.459412	-0.41768	0.676181
PC10392_c1_g1	51.3571	0.187201	0.339497	0.551408	0.581354	0.859112
PC10392_c1_g2	6.17072	0.852596	0.418247	2.0385	0.0415001
PC10394_c0_g1	18.5665	0.285165	0.282602	1.00907	0.31294	0.746177
PC10396_c0_g1	47.6474	0.588128	0.361536	1.62675	0.103791	0.570421
PC10396_c1_g2	4.53212	-0.767612	0.523736	-1.46565	0.142745
PC10397_c0_g1	11.7802	0.435484	0.38198	1.14007	0.254257
PC10398_c0_g1	6.48314	0.600133	0.482441	1.24395	0.213517
PC104_c0_g1	621.899	0.326257	0.169215	1.92806	0.0538475	0.453548
PC104_c0_g2	286.213	-0.187214	0.195404	-0.958091	0.338017	0.754156
PC1040_c0_g1	455.787	-0.109078	0.143328	-0.761042	0.446632	0.807154
PC10402_c0_g1	13.6074	0.632914	0.46804	1.35226	0.176291
PC10403_c0_g1	21.1194	-0.310247	0.383272	-0.809469	0.418245	0.791437
PC10404_c0_g1	23.9868	-0.171646	0.335171	-0.512115	0.60857	0.871013
PC1041_c0_g1	628.956	0.126807	0.0874365	1.45028	0.146981	0.626718
PC10410_c0_g1	417.403	-0.185585	0.126884	-1.46263	0.143568	0.623807
PC10416_c0_g1	120.929	-0.092197	0.19956	-0.462002	0.64408	0.8877
PC1042_c0_g1	180.633	0.265218	0.260153	1.01947	0.307981	0.74485
PC10423_c0_g1	47.6481	-0.353683	0.17899	-1.97599	0.0481557	0.434035
PC10423_c0_g2	17.7019	-0.0568404	0.323488	-0.175711	0.860521
PC10424_c0_g1	11.1638	-0.534041	0.357908	-1.49212	0.135668
PC10425_c0_g1	504.778	-0.0280902	0.128456	-0.218676	0.826902	0.951151
PC10427_c0_g1	189.225	-0.00236266	0.147191	-0.0160516	0.987193	0.996342
PC10427_c1_g1	55.8589	0.051576	0.420513	0.12265	0.902384	0.972651
PC10427_c1_g3	4.0814	-0.149965	0.509573	-0.294296	0.768532
PC10428_c0_g1	12879.2	-0.189894	0.438211	-0.433338	0.664769	0.895508
PC1043_c0_g1	539.264	0.0206128	0.108683	0.18966	0.849576	0.957692
PC1043_c1_g1	90.9564	0.38763	0.45091	0.859662	0.389975	0.777882
PC1043_c2_g1	839.328	-0.0783659	0.188162	-0.416481	0.677058	0.900603
PC1043_c4_g1	33.0561	-0.361782	0.20118	-1.7983	0.07213	0.504231
PC1043_c7_g1	10.2782	-0.639184	0.571667	-1.1181	0.263522
PC20936_c0_g1	42.1988	-2.47021	0.729529	-3.38603	0.000709116	0.0584737
PC10434_c0_g1	58.3949	-0.159927	0.164415	-0.972703	0.330701	0.753268
PC10435_c0_g1	40.3723	-0.234222	0.223506	-1.04795	0.294663	0.740179
PC10437_c0_g2	4.23531	0.811919	1.02317	0.79353	0.427469
PC10438_c0_g1	46.8836	0.696466	0.399846	1.74183	0.0815375	0.524396
PC10438_c1_g1	216.542	-0.172391	0.18372	-0.938332	0.348074	0.760602
PC10438_c1_g2	40.3228	0.0222284	0.169362	0.131248	0.895579	0.970235
PC10438_c1_g3	189.584	0.0420646	0.109775	0.383189	0.701579	0.90741
PC10439_c0_g1	27.9167	0.572152	0.28402	2.01448	0.0439596	0.417992
PC10439_c1_g2	3.9983	0.308367	0.529451	0.582428	0.560279
PC1044_c0_g1	1013.08	0.158917	0.204405	0.777464	0.436885	0.80174
PC1044_c0_g2	222.228	0.244377	0.143215	1.70637	0.0879399	0.539441
PC10440_c0_g1	46.4361	-0.0856523	0.205728	-0.416337	0.677163	0.900603
PC10441_c0_g1	10.5938	-0.6559	0.977632	-0.670906	0.50228
PC10441_c0_g2	10.2541	-0.314571	1.05726	-0.297534	0.766059
PC10443_c0_g1	637.798	-0.0704955	0.126117	-0.558968	0.576183	0.858198
PC10444_c0_g1	7.14034	-0.0195251	0.5629	-0.0346867	0.97233
PC10445_c0_g1	120.029	0.420647	0.326025	1.29023	0.196971	0.674067
PC10445_c1_g1	1311.5	0.14759	0.242507	0.608598	0.542791	0.845961
PC10445_c2_g1	8.7377	0.579107	0.507819	1.14038	0.254128
PC10447_c0_g1	113.327	-0.0370649	0.333879	-0.111013	0.911606	0.974692
PC10448_c0_g1	22.3901	0.917283	0.427524	2.14557	0.0319071	0.36967
PC10449_c0_g1	35.2994	0.24854	0.268923	0.924205	0.355379	0.765306
PC1045_c0_g1	939.61	-0.146378	0.145154	-1.00844	0.313245	0.746309
PC10451_c0_g1	4.91253	0.828112	0.573196	1.44473	0.148535
PC10452_c0_g1	114.887	-0.0983583	0.181173	-0.542896	0.587201	0.86136
PC10454_c0_g1	8.37441	0.065446	0.608876	0.107487	0.914403
PC10455_c0_g1	20.2441	0.460445	0.326676	1.40948	0.158692	0.639182
PC10456_c0_g1	688.411	0.111706	0.415473	0.268865	0.788033	0.939121
PC10457_c0_g2	13.4748	-0.287105	0.444617	-0.645735	0.518451
PC1046_c0_g1	172.505	-0.15132	0.241787	-0.62584	0.53142	0.841651
PC1046_c1_g1	5.42045	-0.142363	0.462455	-0.307842	0.758203
PC10460_c0_g1	11.2338	0.222026	0.369047	0.60162	0.547427
PC10461_c0_g1	1894.76	0.0577405	0.342196	0.168735	0.866005	0.962362
PC10461_c0_g2	1276.87	0.1466	0.362138	0.404819	0.685611	0.902219
PC10462_c0_g2	15.1385	0.219402	0.368448	0.595475	0.551526
PC10462_c1_g1	17.2952	-0.751639	0.308622	-2.43547	0.0148726
PC10462_c2_g1	4.41545	0.657371	0.611923	1.07427	0.282702
PC10462_c5_g1	6.25574	-1.22409	0.67462	-1.81449	0.0696023
PC10463_c0_g1	136.29	0.128881	0.240408	0.536093	0.591894	0.863444
PC10463_c2_g1	30.4118	-0.0723392	0.236175	-0.306295	0.75938	0.92827
PC10464_c0_g1	22.2604	0.210023	0.320331	0.655643	0.512054	0.833497
PC2243_c0_g1	808.93	-2.35897	0.389271	-6.05997	1.36145e-09	4.26415e-06
PC10467_c1_g1	11.3769	0.459013	0.615511	0.745743	0.455823
PC10467_c2_g1	12.9066	-0.644782	0.500363	-1.28863	0.197528
PC10468_c0_g1	4928.88	0.276355	0.0955046	2.89363	0.00380817	0.141104
PC1047_c0_g1	131.712	-0.222306	0.223155	-0.996194	0.319156	0.749025
PC10470_c0_g1	160.448	-0.172827	0.33664	-0.51339	0.607679	0.870506
PC10471_c0_g1	50.425	0.120345	0.318987	0.377273	0.70597	0.909244
PC10472_c0_g1	18.3228	-0.512228	0.434343	-1.17932	0.238272	0.709993
PC10472_c0_g2	6.34535	0.222987	0.452693	0.492578	0.622311
PC10472_c2_g2	3.23998	-1.67344	1.11011	-1.50746	0.131692
PC10473_c0_g1	22.8748	0.0170251	0.296279	0.0574633	0.954176	0.986393
PC10474_c0_g1	22.1318	0.45592	0.481439	0.946994	0.343642	0.758241
PC10475_c0_g1	42.7037	-0.0855481	0.259643	-0.329484	0.74179	0.922677
PC10475_c0_g2	16.0813	0.418662	0.34499	1.21355	0.22492
PC10475_c2_g1	9.70659	-0.182424	0.416288	-0.438217	0.661229
PC10477_c0_g1	289.101	0.783036	0.827134	0.946685	0.343799	0.758282
PC10478_c0_g1	10.4686	-0.743158	0.368301	-2.0178	0.043612
PC1048_c0_g1	339.9	-0.0755505	0.159076	-0.474935	0.634833	0.883797
PC1048_c0_g2	128.306	0.0396139	0.153212	0.258556	0.795978	0.941887
PC1048_c1_g2	342.401	0.226703	0.324022	0.699652	0.484145	0.821895
PC1048_c2_g1	97.5866	-0.654276	0.352445	-1.85639	0.0633974	0.48165
PC1048_c4_g1	8.98177	0.000187893	0.387701	0.000484632	0.999613
PC10480_c0_g1	61.0003	0.311214	0.240915	1.2918	0.196427	0.674067
PC10480_c0_g2	42.5277	-0.521128	0.201781	-2.58264	0.00980483	0.2284
PC10481_c1_g1	9.02453	-0.182573	0.45056	-0.405213	0.685321
PC10487_c1_g1	9.06422	-0.529662	0.500458	-1.05836	0.289893
PC10487_c2_g1	248.957	-0.207342	0.184467	-1.12401	0.26101	0.723004
PC10488_c1_g1	20.2159	0.703149	0.39326	1.788	0.0737755	0.50854
PC10488_c1_g2	11.7767	0.412886	0.440322	0.937693	0.348402
PC1049_c0_g1	479.564	0.0739664	0.111947	0.660725	0.508789	0.832158
PC104936_c0_g1	1412.25	0.912923	1.01123	0.902784	0.36664	0.769241
PC104937_c0_g1	593.74	-0.44212	0.369657	-1.19603	0.231686	0.704107
PC104939_c0_g1	7.59087	-1.33357	0.547229	-2.43695	0.0148116
PC104942_c0_g1	12.3887	-0.251633	0.640495	-0.392873	0.694413
PC104943_c0_g1	27.293	0.230208	0.364322	0.631881	0.527465	0.840154
PC104947_c0_g1	1398.58	0.785167	0.991727	0.791716	0.428526	0.79765
PC104948_c0_g1	134.632	-0.0510926	0.119652	-0.427009	0.669373	0.896963
PC104950_c0_g1	4.34064	0.177056	0.929905	0.190402	0.848994
PC104953_c0_g1	739.977	0.258599	0.183308	1.41074	0.158323	0.63827
PC10496_c0_g1	18.8123	0.460849	0.330226	1.39556	0.162848	0.64299
PC104960_c0_g1	5.551	-0.415022	0.402548	-1.03099	0.302547
PC104967_c0_g1	353.253	-0.0191496	0.159202	-0.120284	0.904258	0.972977
PC104979_c0_g1	9.13823	0.142807	0.447578	0.319066	0.749677
PC10498_c0_g1	231.069	0.180682	0.174444	1.03576	0.300316	0.743526
PC104982_c0_g1	14.1716	-0.0508623	0.607574	-0.0837137	0.933284
PC104985_c0_g1	58.048	1.32663	1.11856	1.18601	0.235617	0.707098
PC104995_c0_g1	53.5129	-0.190148	0.334287	-0.568818	0.56948	0.855829
PC104999_c0_g1	25.8479	0.14557	0.284195	0.512218	0.608498	0.871013
PC105_c0_g1	3914.39	0.27138	0.3761	0.721563	0.470563	0.815737
PC105_c0_g2	827.74	0.112127	0.442118	0.253613	0.799795	0.943123
PC1050_c0_g1	1592.17	0.00210867	0.182653	0.0115447	0.990789	0.996816
PC10500_c0_g1	28.6084	0.369376	0.614458	0.601141	0.547746	0.847624
PC105001_c0_g1	70.0879	2.00366	1.56622	1.2793	0.200791	0.676912
PC105023_c0_g1	16.5579	0.0822928	0.556086	0.147986	0.882354
PC10503_c0_g1	24.0864	0.188564	0.619498	0.304381	0.760838	0.928608
PC10503_c0_g2	5.73312	1.11007	0.535723	2.0721	0.0382563
PC10503_c1_g1	24.5932	0.235311	0.246221	0.955694	0.339227	0.755208
PC10503_c1_g2	27.2384	0.185792	0.231903	0.801166	0.423036	0.793997
PC10503_c2_g1	28.3493	-0.336571	0.904764	-0.371999	0.709894	0.910018
PC105031_c0_g1	11.7648	-3.30095	1.0196	-3.2375	0.00120582
PC105032_c0_g1	21.2214	-0.684115	1.10042	-0.621683	0.53415	0.842663
PC105033_c0_g1	246.052	0.844449	0.834787	1.01157	0.311741	0.745584
PC105034_c0_g1	567.155	0.866585	0.846798	1.02337	0.306134	0.744383
PC105036_c0_g1	46.8141	-0.47568	0.432922	-1.09877	0.27187	0.728084
PC105043_c0_g1	375.187	0.818608	0.797211	1.02684	0.304496	0.743526
PC105049_c0_g1	18.4665	0.60038	0.73669	0.814969	0.41509	0.789965
PC10505_c0_g1	475.098	0.0124255	0.183958	0.0675455	0.946147	0.984394
PC105069_c0_g1	31.9491	0.326385	0.248635	1.31271	0.189282	0.667472
PC105079_c0_g1	19.6789	0.130255	0.213021	0.611468	0.54089	0.845259
PC105080_c0_g1	977.238	0.1534	0.169713	0.903879	0.366059	0.768551
PC105089_c0_g1	96.6574	0.100968	0.347095	0.290895	0.771132	0.932659
PC1051_c0_g1	449.232	0.411628	0.169599	2.42706	0.0152216	0.279047
PC105104_c0_g1	115.663	-0.0469102	0.185998	-0.252208	0.800881	0.943661
PC10511_c0_g1	58.4971	-0.135091	0.15544	-0.869087	0.3848	0.775585
PC105111_c0_g1	445.351	0.549021	0.913859	0.600772	0.547992	0.847624
PC10512_c0_g1	43.6695	0.0349587	0.251803	0.138833	0.889582	0.968251
PC10512_c1_g1	25.8941	-0.239447	0.474028	-0.505133	0.613466	0.873632
PC105125_c0_g1	908.017	0.457475	0.197383	2.3177	0.0204656	0.318755
PC10513_c1_g1	4.99323	0.705269	0.498314	1.41531	0.156978
PC10514_c0_g2	66.9616	-0.0591261	0.330313	-0.179	0.857938	0.95964
PC10514_c0_g3	23.5295	-0.390932	0.308692	-1.26641	0.205365	0.681452
PC10514_c0_g4	7.28563	-0.295473	0.787064	-0.375412	0.707354
PC105141_c0_g1	183.874	2.33736	1.45669	1.60457	0.108588	0.580089
PC105144_c0_g1	81.4474	1.13818	0.742129	1.53366	0.125112	0.599015
PC10515_c0_g1	39.2082	0.138328	0.278168	0.497284	0.618989	0.876751
PC10515_c0_g3	13.9457	-0.121296	0.269653	-0.449823	0.652838
PC10515_c1_g1	19.1645	0.82729	0.536662	1.54155	0.123184	0.595961
PC105156_c0_g1	12.6038	0.356919	0.351963	1.01408	0.310544
PC10516_c0_g1	52.8117	-0.241287	0.169246	-1.42567	0.153965	0.633294
PC10516_c0_g3	12.2772	-0.749071	0.421811	-1.77585	0.0757583
PC10516_c1_g1	15.6695	-0.334754	0.330472	-1.01296	0.311081
PC10517_c0_g1	25.3219	-0.281825	0.34062	-0.827388	0.408017	0.786814
PC105173_c0_g1	30.204	-0.375082	0.369961	-1.01384	0.310658	0.745173
PC105176_c0_g1	3.90093	-0.0668211	0.727455	-0.091856	0.926812
PC10518_c0_g1	616.451	0.0967052	0.333531	0.289943	0.77186	0.932901
PC105184_c0_g1	3743.04	-0.1478	0.146919	-1.006	0.314417	0.746605
PC105197_c0_g1	18.8409	-0.141964	0.283429	-0.500879	0.616456	0.8752
PC1052_c0_g1	166.36	0.101798	0.120568	0.844316	0.398493	0.781911
PC1052_c0_g2	22.7612	0.0631733	0.288156	0.219233	0.826469	0.950899
PC105209_c0_g1	5.55687	-0.0308067	0.521164	-0.0591113	0.952863
PC10521_c0_g1	30.2427	0.282982	0.248325	1.13957	0.254467	0.718256
PC10521_c0_g2	25.1555	0.00838264	0.271885	0.0308315	0.975404	0.992628
PC10521_c1_g1	7.44664	0.880254	0.445206	1.97718	0.0480209
PC105210_c0_g1	510.184	0.632203	1.00223	0.630794	0.528175	0.840392
PC10522_c0_g1	359.102	0.057268	0.144478	0.39638	0.691825	0.903236
PC10522_c0_g2	91.8999	0.735341	0.780085	0.942642	0.345864	0.759443
PC10522_c1_g2	5.11024	-0.0192203	0.469942	-0.0408992	0.967376
PC105227_c0_g1	334.088	-0.175035	0.168086	-1.04134	0.297717	0.741398
PC10523_c0_g1	22.6448	0.487572	0.530562	0.918973	0.35811	0.766693
PC105240_c0_g1	349.436	0.940598	0.806502	1.16627	0.243506	0.711803
PC10525_c0_g2	72.7478	0.311953	0.225943	1.38067	0.16738	0.645785
PC10525_c1_g1	16.0229	0.439975	0.463678	0.94888	0.342681
PC10525_c3_g2	16.6757	-0.445349	0.258	-1.72616	0.084318
PC105252_c0_g1	8.15751	0.185951	0.670404	0.277371	0.781495
PC105264_c0_g1	2243.82	0.255145	0.155429	1.64156	0.100682	0.564195
PC105278_c0_g1	130.829	-0.0114575	0.212059	-0.0540297	0.956912	0.986948
PC10528_c0_g1	34.4215	-0.715799	0.364913	-1.96156	0.0498133	0.440254
PC10528_c1_g1	80.5315	0.153167	0.625848	0.244736	0.806661	0.945853
PC105281_c0_g1	3.61879	-0.821547	0.538627	-1.52526	0.127194
PC105287_c0_g1	22.7082	-0.267402	0.274382	-0.974561	0.329778	0.753055
PC1053_c0_g2	282.565	-0.0374451	0.174611	-0.214448	0.830198	0.95152
PC1053_c0_g3	16.4946	-0.319184	0.26286	-1.21427	0.224644
PC1053_c1_g1	14.8331	-0.164814	0.310199	-0.531317	0.595199
PC1053_c1_g2	1807.99	-0.016425	0.12437	-0.132066	0.894932	0.970214
PC1053_c1_g3	29.757	0.0510583	0.345025	0.147984	0.882355	0.966829
PC1053_c2_g1	404.371	0.0424112	0.132055	0.321163	0.748087	0.924151
PC1053_c3_g1	155.521	-0.20695	0.25785	-0.802601	0.422206	0.793444
PC1053_c3_g2	41.1123	0.287239	0.331557	0.866336	0.386306	0.776068
PC1053_c3_g3	35.9475	-0.103109	0.283462	-0.363748	0.716046	0.911712
PC10531_c0_g1	505.048	-0.237785	0.214797	-1.10702	0.268284	0.726291
PC10532_c0_g1	99.8181	-0.253868	0.267629	-0.948583	0.342833	0.757651
PC10533_c0_g1	1653.69	-0.142931	0.304751	-0.46901	0.639063	0.885632
PC105331_c0_g1	11.4197	-0.496346	0.381658	-1.3005	0.19343
PC10534_c0_g2	33.4652	-0.318438	0.39107	-0.814273	0.415488	0.789965
PC105365_c0_g1	125.515	-0.0194245	0.146452	-0.132634	0.894483	0.970044
PC105369_c0_g1	8.36813	-1.38511	0.552924	-2.50507	0.0122428
PC10537_c0_g1	2186.13	0.0296848	0.370848	0.0800459	0.936201	0.981708
PC10538_c0_g1	41.738	0.805054	0.536992	1.49919	0.133824	0.611745
PC10538_c0_g2	5.61059	0.665344	0.500607	1.32908	0.183823
PC10538_c0_g5	7.74825	1.02424	0.395537	2.5895	0.00961147
PC10538_c0_g6	69.5716	0.873191	0.621287	1.40545	0.159886	0.640616
PC105387_c0_g1	8.5964	-0.169265	0.501029	-0.337835	0.735488
PC1054_c0_g1	13789.7	0.244166	0.250574	0.974428	0.329844	0.753055
PC10540_c0_g1	13.7409	0.473212	0.30902	1.53133	0.125688
PC10540_c1_g1	9.98977	-0.379681	0.321933	-1.17938	0.238247
PC10540_c3_g1	11.2411	-0.703405	0.564983	-1.245	0.213131
PC10541_c0_g1	2131.95	0.140677	0.126649	1.11076	0.266671	0.725799
PC10541_c1_g1	23.2956	-0.365881	0.481087	-0.760528	0.446939	0.807381
PC105419_c0_g1	565.181	0.080002	0.257715	0.310428	0.756235	0.927288
PC10542_c0_g2	28.9323	0.26853	0.355191	0.756014	0.449641	0.808657
PC10542_c1_g4	7.74129	-0.0766737	0.751543	-0.102022	0.918739
PC7808_c0_g2	61.7139	-2.03004	0.659314	-3.07901	0.00207688	0.0994836
PC10545_c0_g1	39.085	-0.0828136	0.209864	-0.394606	0.693134	0.903307
PC10545_c0_g3	65.3304	0.145907	0.37699	0.38703	0.698734	0.90624
PC10545_c1_g1	7.77602	-0.09891	0.401824	-0.246152	0.805564
PC105459_c0_g1	8.35759	0.573762	0.625587	0.917158	0.35906
PC10546_c2_g1	48.2672	-0.157169	0.454791	-0.345585	0.729654	0.917635
PC105464_c0_g1	7.93167	-1.64413	0.916613	-1.7937	0.0728609
PC105468_c0_g1	86.4353	-0.0823625	0.18489	-0.445467	0.655982	0.892478
PC105487_c0_g1	577.873	-0.232609	0.165132	-1.40862	0.158948	0.639513
PC10549_c0_g1	1305.13	-0.383631	0.430768	-0.890575	0.373157	0.771176
PC10549_c0_g2	264.825	0.401417	0.33682	1.19178	0.233346	0.705325
PC10549_c0_g3	5.22381	0.764558	0.469719	1.62769	0.10359
PC10549_c1_g1	32.2138	0.26718	0.258166	1.03492	0.300707	0.743526
PC105496_c0_g1	168.794	-0.359292	0.166776	-2.15434	0.0312134	0.367054
PC1055_c0_g1	98.9028	0.208837	0.221253	0.943884	0.345229	0.75935
PC1055_c0_g2	21.9163	0.566686	0.444077	1.2761	0.20192	0.678112
PC1055_c0_g3	72.2624	0.139795	0.25486	0.548517	0.583337	0.859759
PC1055_c0_g4	164.624	0.0990788	0.170618	0.580704	0.56144	0.853933
PC10550_c0_g1	23.8061	0.0258702	0.352028	0.073489	0.941417	0.983234
PC10550_c0_g2	7.74018	0.0383363	0.714764	0.0536348	0.957226
PC10550_c1_g1	128.207	0.892421	0.766172	1.16478	0.244109	0.712237
PC105500_c0_g1	22.8347	0.420795	0.303014	1.38869	0.164926	0.64299
PC105507_c0_g1	3.97815	2.29539	0.767561	2.99049	0.00278529
PC10551_c0_g1	1583.2	-0.344433	0.162205	-2.12345	0.0337163	0.378541
PC10553_c0_g1	81.2796	-0.124549	0.207339	-0.600704	0.548037	0.847624
PC105531_c0_g1	16.4929	-0.128083	0.656647	-0.195056	0.845349
PC105544_c0_g1	79.2679	1.00142	0.393239	2.5466	0.0108779	0.24192
PC105545_c0_g1	3.89051	0.990841	0.848454	1.16782	0.242879
PC105547_c0_g1	72.7426	0.458093	0.252976	1.81081	0.0701699	0.500292
PC10555_c0_g1	573.472	0.442395	0.439661	1.00622	0.314311	0.746605
PC10555_c0_g3	44.664	-0.0397166	0.201801	-0.196811	0.843976	0.955766
PC10557_c0_g1	1133.94	-0.220921	0.133434	-1.65566	0.0977909	0.559581
PC1056_c0_g1	549.112	0.071726	0.156058	0.459611	0.645795	0.888479
PC1056_c1_g1	214.44	0.143016	0.179801	0.795411	0.426374	0.796437
PC1056_c2_g1	201.331	0.229321	0.161081	1.42363	0.154553	0.633294
PC1056_c3_g1	17.0129	-0.252698	0.321037	-0.78713	0.431206
PC10560_c0_g1	10.9741	0.208587	0.435123	0.479375	0.631672
PC105601_c0_g1	9594.74	0.129252	0.122727	1.05317	0.292264	0.738858
PC10561_c0_g1	5.19819	0.498173	0.650099	0.766302	0.443496
PC105613_c0_g1	82.3403	0.582705	0.298368	1.95297	0.0508229	0.443596
PC10562_c1_g1	7.94669	0.46363	0.48514	0.955662	0.339243
PC10562_c1_g3	32.4519	0.0905519	0.49612	0.18252	0.855174	0.958602
PC105622_c0_g1	17.6628	-0.176286	0.287863	-0.612397	0.540275
PC18231_c0_g1	232.269	-1.88728	0.590205	-3.19767	0.00138543	0.0798178
PC10563_c0_g1	27.8604	-0.0915228	0.276559	-0.330934	0.740694	0.922251
PC105630_c0_g1	3.76336	0.293069	0.794284	0.368973	0.712148
PC105639_c0_g1	4801.51	0.35076	0.162828	2.15417	0.0312269	0.367054
PC10564_c1_g1	44.6801	-0.071261	0.470828	-0.151352	0.879698	0.966217
PC10565_c0_g1	15.2789	0.217756	0.465128	0.468164	0.639667
PC10565_c2_g1	9.13054	-0.111126	0.381548	-0.291249	0.770861
PC105652_c0_g1	7.41421	0.116868	0.526673	0.221898	0.824393
PC10566_c0_g2	2.93167	0.936395	0.709919	1.31902	0.187164
PC105660_c0_g1	346.887	0.10682	0.143938	0.742124	0.458012	0.812314
PC10567_c0_g1	58.0546	-0.104003	0.250704	-0.414844	0.678256	0.900603
PC105672_c0_g1	3.01085	-1.40256	0.927335	-1.51246	0.130418
PC10568_c1_g1	15.8823	0.305167	0.380396	0.802235	0.422417
PC10569_c0_g1	77.8913	0.220198	0.3843	0.572985	0.566655	0.854976
PC1057_c0_g1	813.573	-0.183011	0.0881998	-2.07496	0.0379903	0.397102
PC10570_c0_g1	1195.91	0.00125628	0.104163	0.0120607	0.990377	0.99681
PC10571_c0_g1	26.2723	0.0764074	0.224509	0.340332	0.733607	0.919279
PC10572_c0_g1	8.17398	-0.3938	0.489605	-0.804323	0.421211
PC10572_c0_g2	5.71055	0.314624	0.421	0.747327	0.454866
PC105720_c0_g1	24.9064	-0.22505	0.689151	-0.326561	0.744	0.923198
PC105726_c0_g1	10.8166	-0.666929	0.426606	-1.56334	0.117973
PC105737_c0_g1	59.6152	0.756906	0.789197	0.959085	0.337516	0.753795
PC10574_c0_g2	8.41084	0.0394245	0.368744	0.106916	0.914856
PC10574_c0_g4	6.34734	0.382063	0.505823	0.755331	0.450051
PC105744_c0_g1	10.5932	-0.391467	0.368936	-1.06107	0.288657
PC10575_c1_g1	5.35884	0.860324	0.395852	2.17335	0.0297542
PC105758_c0_g1	15.4577	0.125237	0.335424	0.373368	0.708874
PC105760_c0_g1	359.736	0.809606	0.885652	0.914136	0.360645	0.766743
PC105768_c0_g1	10	0.537479	0.432551	1.24258	0.214023
PC10578_c0_g1	1125.11	0.0809303	0.139396	0.580578	0.561525	0.853933
PC105782_c0_g1	1949.24	0.0890593	0.0894644	0.995472	0.319507	0.749025
PC105786_c0_g1	78.2477	0.0915994	0.16454	0.5567	0.577732	0.858391
PC10579_c0_g1	214.729	0.190919	0.251744	0.758385	0.448221	0.807976
PC1058_c0_g3	112.743	0.0679826	0.148903	0.456557	0.647989	0.889826
PC10583_c0_g1	224.332	-0.353649	0.15338	-2.30571	0.0211269	0.318994
PC105833_c0_g1	12.9048	-0.884393	0.32277	-2.74001	0.00614371
PC10584_c0_g1	87.9233	-0.28617	0.148465	-1.92753	0.0539136	0.453548
PC10585_c0_g1	7.52286	-0.666433	0.424303	-1.57065	0.116263
PC10586_c1_g2	6.21101	-0.532884	0.410999	-1.29656	0.194784
PC105866_c0_g1	37.4938	0.354175	0.257624	1.37478	0.169201	0.647703
PC105869_c0_g1	8.59783	-0.439199	0.425628	-1.03188	0.302126
PC10587_c0_g1	18.4688	-0.278614	0.381848	-0.729645	0.465607	0.813641
PC105873_c0_g1	6.55663	0.659923	0.588388	1.12158	0.262042
PC10588_c0_g1	4932.66	-0.789453	0.307554	-2.56687	0.010262	0.234562
PC10588_c0_g2	71.1119	-1.03422	0.462431	-2.23649	0.0253197	0.341538
PC10588_c0_g3	20.7025	-0.567156	0.44764	-1.26699	0.205158	0.681375
PC10588_c0_g4	8.67934	0.499405	0.637039	0.783947	0.433071
PC10588_c1_g1	6.20612	-0.266969	0.426991	-0.625234	0.531817
PC105896_c0_g1	9542.44	0.00348553	0.137005	0.025441	0.979703	0.993361
PC1059_c0_g1	15.1861	0.26298	0.407115	0.64596	0.518305
PC10590_c0_g1	19.9766	0.329564	0.308822	1.06717	0.285897	0.736408
PC10591_c0_g1	749.578	-0.0588929	0.0953379	-0.617728	0.536754	0.843647
PC10592_c0_g1	19.2465	-0.474707	0.5711	-0.831216	0.405852	0.785561
PC10592_c1_g1	7.83493	0.309814	0.391336	0.791681	0.428547
PC105922_c0_g1	99.6513	2.27017	1.31397	1.72772
PC10593_c0_g1	12.9843	-0.543083	0.431583	-1.25835	0.208265
PC105939_c0_g1	35.1428	0.576979	0.619405	0.931504	0.351593	0.763563
PC10595_c0_g1	548.271	-0.431851	0.153538	-2.81266	0.00491334	0.160822
PC10595_c0_g2	29.5472	-0.152661	0.212928	-0.716963	0.473397	0.816849
PC105952_c0_g1	25.298	-0.615112	0.370018	-1.66238	0.0964356	0.556833
PC10596_c0_g1	47.3285	0.0313173	0.263782	0.118724	0.905494	0.973138
PC10597_c0_g1	11.0936	-0.241542	0.374374	-0.645189	0.518805
PC10598_c0_g1	482.442	0.117075	0.167806	0.69768	0.485377	0.822612
PC105989_c0_g1	11.2039	0.619332	0.711311	0.870691	0.383923
PC105994_c0_g1	2.94735	-0.788005	1.11655	-0.705748	0.480345
PC106_c0_g1	1897.61	0.00860668	0.0783853	0.1098	0.912568	0.974779
PC1060_c0_g1	309.607	0.313744	0.141373	2.21927	0.0264683	0.346316
PC1060_c0_g2	141.396	-0.274371	0.246049	-1.1151	0.264806	0.724635
PC106005_c0_g1	11.8264	-0.602775	0.330824	-1.82204	0.0684483
PC106010_c0_g1	57.1917	-0.156515	0.3409	-0.459122	0.646147	0.888608
PC106014_c0_g1	501.318	0.85998	0.879981	0.977271	0.328435	0.752816
PC10602_c0_g1	9.32517	-0.132257	0.491323	-0.269185	0.787787
PC10603_c0_g3	6.62079	0.13982	0.550893	0.253806	0.799645
PC106031_c0_g1	251.039	0.158883	0.215561	0.737067	0.461082	0.813141
PC106035_c0_g1	8.53294	1.33355	0.641658	2.07829	0.0376824
PC106045_c0_g1	353.162	0.781878	1.02237	0.764768	0.44441	0.806574
PC10605_c0_g1	3.98543	0.436429	0.570801	0.76459	0.444516
PC10605_c0_g2	13.6286	0.0446926	0.465729	0.0959626	0.92355
PC10605_c0_g3	5.83598	0.485534	0.617326	0.786511	0.431568
PC106057_c0_g1	14.0818	-0.104732	0.418676	-0.25015	0.802472
PC10606_c0_g1	25.7295	-0.11311	0.272852	-0.414549	0.678472	0.900603
PC106061_c0_g1	4.97448	-0.233021	0.888086	-0.262386	0.793024
PC106069_c0_g1	6.81243	-0.0553822	0.534253	-0.103663	0.917437
PC10607_c0_g1	62.2378	0.0580638	0.21813	0.266188	0.790094	0.939958
PC10608_c0_g1	75.9378	-0.300946	0.566258	-0.531464	0.595097	0.864555
PC106087_c0_g1	9.97341	-0.848313	0.334577	-2.53548	0.0112293
PC10609_c0_g1	5.59821	0.237995	0.477083	0.498855	0.617881
PC1061_c0_g1	27.0726	-0.420279	0.209647	-2.00469	0.0449959	0.422577
PC1061_c0_g2	34.3318	-0.139112	0.280072	-0.496701	0.6194	0.876795
PC1061_c1_g1	99.0875	-0.149105	0.188267	-0.791989	0.428367	0.797588
PC1061_c2_g1	216.511	-0.192673	0.157143	-1.2261	0.220161	0.69468
PC10610_c0_g1	116.396	0.404716	0.615782	0.657238	0.511028	0.833044
PC10612_c0_g1	67.8125	0.549884	0.477193	1.15233	0.249186	0.714734
PC10613_c0_g1	6.08479	-0.664974	0.443493	-1.4994	0.13377
PC10615_c1_g1	132.416	0.00207935	0.173616	0.0119767	0.990444	0.996816
PC106153_c0_g1	10.5229	-0.0972898	0.602537	-0.161467	0.871726
PC10618_c0_g1	17.4548	-0.669089	1.75336	-0.381603	0.702756
PC10618_c0_g3	2.38343	2.69852	1.23594	2.18337	0.0290086
PC106180_c0_g1	41.5869	0.888988	0.701254	1.26771	0.204901	0.680928
PC10619_c0_g1	49.1511	-0.0140198	0.210219	-0.0666914	0.946827	0.984394
PC36159_c0_g1	46.0588	-1.83978	0.560852	-3.28032	0.00103689	0.0715491
PC10620_c0_g1	336.84	-0.223338	0.374527	-0.596322	0.55096	0.848536
PC106206_c0_g1	113.406	0.43383	0.175253	2.47546	0.0133066	0.263825
PC10621_c0_g1	86.1551	-0.355275	0.259117	-1.3711	0.170343	0.648085
PC10621_c1_g1	57.9157	-0.212929	0.248763	-0.855948	0.392026	0.779077
PC10622_c0_g1	237.019	-0.0547348	0.170949	-0.320182	0.74883	0.92423
PC10622_c1_g2	8.49716	0.373552	0.453081	0.824471	0.409672
PC10623_c2_g1	10.233	0.623973	0.483205	1.29132	0.196592
PC10624_c0_g2	6.07442	0.175399	0.462914	0.378902	0.704761
PC106241_c0_g1	7.64085	-0.737922	0.465623	-1.58481	0.11301
PC10625_c0_g1	7.54392	0.233585	0.460875	0.506829	0.612275
PC106262_c0_g1	244.728	0.233718	0.236709	0.987362	0.323465	0.75134
PC106264_c0_g1	412.073	-0.0806714	0.114344	-0.705518	0.480488	0.82014
PC10627_c0_g2	104.455	-0.456545	0.354586	-1.28754	0.197905	0.674998
PC106273_c0_g1	53.0659	0.56692	0.488618	1.16025	0.245946	0.712791
PC10628_c3_g1	8.65304	-0.685911	0.398479	-1.72132	0.085192
PC106282_c0_g1	15.9751	-0.522634	0.307622	-1.69895	0.089329
PC106285_c0_g1	2.73782	0.298505	0.931031	0.320617	0.748501
PC10629_c0_g1	9.91392	0.800604	0.530671	1.50866	0.131385
PC1063_c0_g1	962.738	0.251626	0.262257	0.959464	0.337325	0.753795
PC10631_c0_g1	77.3204	-0.0504728	0.171161	-0.294884	0.768082	0.931963
PC10631_c0_g2	12.4642	0.105545	0.31139	0.338948	0.734649
PC10633_c0_g1	22.5925	-0.153393	0.318305	-0.481907	0.629872	0.881257
PC10633_c0_g2	6.98192	0.28543	0.425947	0.670107	0.502789
PC10634_c0_g1	19.9603	-0.186765	0.332187	-0.562229	0.57396	0.857715
PC10634_c1_g1	18.3838	0.378288	0.414592	0.912433	0.361541	0.766823
PC10635_c1_g2	9.17871	1.51906	1.01881	1.49101	0.13596
PC10636_c0_g1	17.172	0.0498201	0.361727	0.137728	0.890455
PC10637_c0_g1	22.8206	-0.223228	0.253366	-0.88105	0.378291	0.771333
PC10638_c0_g2	3.25308	0.0533588	1.16619	0.0457548	0.963506
PC10638_c1_g1	318.759	-0.426046	0.153997	-2.76659	0.00566462	0.176157
PC106392_c0_g1	13.6083	0.249437	0.370572	0.673112	0.500876
PC106398_c0_g1	350.422	0.916874	0.865251	1.05966	0.289298	0.737727
PC1064_c0_g1	623.115	-0.214146	0.105165	-2.0363	0.0417204	0.41255
PC1064_c0_g2	328.726	0.135711	0.132101	1.02733	0.304266	0.743526
PC1064_c1_g1	60.7961	0.0931017	0.213891	0.435276	0.663362	0.894817
PC1064_c11_g1	26.5217	0.206186	0.2171	0.949728	0.342251	0.757028
PC1064_c2_g1	28.515	0.224435	0.429919	0.52204	0.601642	0.86756
PC1064_c28_g1	8.30116	-0.0686036	0.385941	-0.177757	0.858914
PC1064_c3_g2	210.608	0.220012	0.303645	0.72457	0.468716	0.815357
PC1064_c4_g1	17.1401	0.186971	0.492148	0.379909	0.704013
PC10640_c0_g1	55.06	0.0127109	0.25325	0.050191	0.95997	0.987649
PC10640_c0_g2	6.4935	0.144192	0.405145	0.355902	0.721914
PC106406_c0_g1	17.9074	-0.818734	0.341131	-2.40006	0.0163924
PC106408_c0_g1	6.36103	-0.327264	0.481184	-0.680121	0.496428
PC106409_c0_g1	813.379	0.0962945	0.142428	0.676093	0.498981	0.828156
PC10641_c0_g1	10.256	-0.548587	0.345843	-1.58623	0.112688
PC106417_c0_g1	435.791	0.119818	0.139706	0.857641	0.391091	0.778729
PC106422_c0_g1	193.56	0.393321	0.419409	0.937797	0.348349	0.760689
PC10643_c0_g1	4.274	0.918635	0.608332	1.51009	0.131021
PC10647_c0_g1	29.7142	-0.0223089	0.270652	-0.0824262	0.934308	0.981183
PC106477_c0_g1	109.121	0.275948	0.266568	1.03519	0.30058	0.743526
PC10648_c0_g2	4.7297	-0.427467	0.694037	-0.615914	0.537951
PC106491_c0_g1	11.7126	0.265591	0.757201	0.350753	0.725773
PC1065_c0_g1	236.325	0.144499	0.12626	1.14446	0.252434	0.717174
PC106500_c0_g1	3.61709	-1.48944	0.952106	-1.56437	0.117731
PC106512_c0_g1	10.4163	-0.509697	0.445088	-1.14516	0.252143
PC10652_c0_g1	37.9725	-0.235154	0.566709	-0.414947	0.678181	0.900603
PC106530_c0_g1	21.1236	0.0893493	0.987153	0.0905121	0.92788	0.979206
PC10654_c0_g1	294.635	0.212906	0.267355	0.796344	0.425832	0.796105
PC10656_c1_g1	2.50695	-0.311825	1.1314	-0.27561	0.782848
PC106564_c0_g1	25.9172	0.0450385	0.399752	0.112666	0.910295	0.974326
PC10657_c2_g1	129.086	0.599968	0.453384	1.32331	0.185733	0.663852
PC10658_c0_g1	8.73308	0.437008	0.636795	0.686262	0.492548
PC10658_c1_g1	4.22123	0.216812	0.414818	0.522666	0.601207
PC10658_c1_g2	4.79002	-0.0328413	0.617422	-0.053191	0.95758
PC10659_c0_g1	152.806	-0.43512	0.310493	-1.40138	0.161099	0.641911
PC250_c0_g1	5175.33	-1.76684	0.259579	-6.80657	9.99523e-12	4.45263e-08
PC10660_c0_g1	171.072	-0.403919	0.288771	-1.39875	0.161888	0.642324
PC106605_c0_g1	20.5657	-0.221071	0.416962	-0.530194	0.595977	0.865143
PC106607_c0_g1	7.96336	-1.47312	0.568732	-2.59018	0.00959269
PC10662_c0_g1	3.2454	-0.506412	1.35272	-0.374366	0.708132
PC10663_c0_g1	68.4427	0.69218	0.482113	1.43572	0.151082	0.630829
PC10664_c0_g1	8.52481	-0.310492	0.49232	-0.630671	0.528256
PC106677_c0_g1	43.0068	0.0868439	0.448851	0.19348	0.846583	0.956709
PC106678_c0_g1	50.7233	-0.118484	0.223633	-0.529813	0.596242	0.865181
PC106679_c0_g1	71.4771	1.32642	0.829939	1.59821	0.109996	0.582991
PC1067_c0_g1	124.642	-0.00964155	0.153374	-0.0628631	0.949875	0.985315
PC106717_c0_g1	26.9538	2.44577	1.91662	1.27609
PC10672_c0_g1	3621.55	-0.313884	0.137906	-2.27607	0.0228419	0.328515
PC10673_c0_g1	984.771	-0.652327	0.357721	-1.82356	0.0682185	0.495142
PC106747_c0_g1	13.5163	-0.0794649	0.3425	-0.232014	0.816527
PC10675_c0_g1	1170.85	-0.312411	0.189268	-1.65063	0.0988137	0.560897
PC10675_c0_g2	246.407	-0.134954	0.343662	-0.392693	0.694546	0.904246
PC10675_c0_g4	82.8475	-0.79117	0.288531	-2.74206	0.00610552	0.182384
PC10675_c1_g2	7.07968	-0.158328	0.393931	-0.401919	0.687744
PC106775_c0_g1	7.2274	-0.931347	1.01241	-0.919929	0.35761
PC106790_c0_g1	14.4284	-0.131482	0.465265	-0.282597	0.777486
PC1068_c0_g1	1345.19	-0.0160828	0.132172	-0.121681	0.903152	0.972873
PC10682_c0_g1	1424.73	0.0482676	0.102561	0.470625	0.637909	0.885065
PC106837_c0_g1	358.009	-0.175489	0.148213	-1.18403	0.2364	0.707652
PC106841_c0_g1	475.539	-0.277705	0.140298	-1.9794	0.0477715	0.432392
PC10685_c0_g1	128.617	-0.185913	0.344126	-0.540245	0.589028	0.861873
PC10686_c0_g1	637.548	-0.442221	0.28288	-1.56328	0.117987	0.591849
PC10687_c0_g2	362.134	-0.119139	0.120453	-0.989089	0.32262	0.750782
PC10688_c0_g1	50.6434	0.0884036	0.175428	0.50393	0.614311	0.874038
PC10688_c1_g1	4.15768	-0.374947	0.535865	-0.699703	0.484113
PC106882_c0_g1	8.04703	1.07563	0.702962	1.53014	0.125981
PC1069_c0_g1	1123.22	-0.518942	0.293152	-1.77021	0.076692	0.516071
PC10690_c0_g1	213.004	0.266598	0.252871	1.05428	0.291753	0.738858
PC106908_c0_g1	518.975	-0.260325	0.194515	-1.33833	0.18079	0.65839
PC10694_c0_g1	153.818	0.00718286	0.165215	0.0434759	0.965322	0.989954
PC106943_c0_g1	9.16475	-0.548707	0.49823	-1.10131	0.270761
PC106947_c0_g1	30.1338	-0.215885	0.29295	-0.736936	0.461161	0.813141
PC10695_c0_g1	86.9299	-0.0916473	0.182679	-0.501685	0.615889	0.874828
PC106959_c0_g1	5.58571	0.243047	0.483133	0.503064	0.614919
PC106966_c0_g1	7.56373	-0.549418	0.437073	-1.25704	0.208739
PC106969_c0_g1	9.43508	-0.0398095	0.410325	-0.0970194	0.922711
PC10697_c0_g2	7.27905	0.457583	0.42419	1.07872	0.280712
PC10697_c1_g1	358.488	-0.125286	0.148133	-0.845772	0.39768	0.78147
PC10698_c0_g1	256.061	-0.0698793	0.303607	-0.230164	0.817965	0.948913
PC10699_c0_g1	111.255	0.152036	0.258305	0.588592	0.556135	0.851336
PC107_c0_g1	277.786	-0.0627828	0.269174	-0.233243	0.815573	0.948443
PC1070_c0_g1	207.085	0.361927	0.308162	1.17447	0.240206	0.710324
PC1070_c0_g2	92.9067	0.256216	0.271828	0.942567	0.345903	0.759443
PC1070_c2_g1	4.13165	-0.355618	0.646223	-0.550303	0.582111
PC10700_c2_g1	11.6748	-0.262803	0.346141	-0.759236	0.447712
PC10701_c0_g1	77.3432	0.0985421	0.162652	0.605847	0.544617	0.847187
PC10702_c0_g1	402.876	0.278665	0.316949	0.879212	0.379286	0.771786
PC107023_c0_g1	955.237	0.741462	0.82004	0.904179	0.365901	0.768551
PC10703_c0_g1	6.73565	-0.39277	0.447795	-0.87712	0.380421
PC107036_c0_g1	210.355	0.152535	0.206154	0.73991	0.459355	0.813141
PC107039_c0_g1	4.33463	0.0824251	0.742336	0.111035	0.911589
PC10704_c1_g1	58.2593	-0.653913	0.282395	-2.3156	0.0205803	0.318755
PC10704_c1_g2	7.70699	0.494089	0.579273	0.852947	0.393689
PC10705_c0_g1	211.206	-0.0166519	0.105358	-0.158051	0.874417	0.96514
PC10706_c0_g2	28.8303	-0.120291	0.330361	-0.36412	0.715768	0.911549
PC10708_c0_g1	11.7664	0.6288	0.402376	1.56272	0.118119
PC10709_c0_g1	84.9433	-0.284773	0.171888	-1.65674	0.0975731	0.559413
PC10709_c0_g2	7.28126	-0.770953	0.445701	-1.72975	0.0836745
PC10709_c0_g3	21.7629	-0.500762	0.319084	-1.56937	0.116561	0.590083
PC1071_c0_g1	876.415	0.116762	0.147244	0.792984	0.427787	0.797224
PC10710_c0_g1	15742.4	-0.23502	0.232654	-1.01017	0.312415	0.746011
PC10710_c0_g2	494.503	-0.0441044	0.168988	-0.260992	0.794099	0.941454
PC10712_c0_g1	19.2655	-0.496959	0.264877	-1.87619	0.0606296	0.475301
PC10713_c0_g1	21.9526	0.0758744	0.303417	0.250066	0.802536	0.944206
PC10713_c1_g1	11.7102	0.479506	0.513613	0.933594	0.350514
PC107143_c0_g1	13.7019	-0.0243375	0.290545	-0.0837649	0.933243
PC10716_c0_g1	36.2177	-0.364825	0.31409	-1.16153	0.245426	0.712791
PC10716_c0_g2	24.8568	-0.104561	0.229367	-0.455868	0.648485	0.8899
PC10717_c0_g1	132.782	0.124461	0.151075	0.823836	0.410033	0.788259
PC71220_c0_g1	54.4029	-1.67802	0.477365	-3.51517	0.000439478	0.0452662
PC1072_c0_g1	474.19	0.102731	0.269076	0.381792	0.702616	0.907964
PC10723_c0_g1	2609.35	0.268583	0.267012	1.00588	0.314471	0.746605
PC107232_c0_g1	4.43183	-1.01459	0.442521	-2.29275	0.0218624
PC10724_c0_g1	31.436	0.187082	0.412873	0.453123	0.65046	0.89117
PC10724_c0_g2	10.1712	-0.0182481	0.389398	-0.0468624	0.962623
PC10725_c0_g2	136.191	0.114829	0.259324	0.442802	0.657909	0.892522
PC107255_c0_g1	8.65009	1.40928	0.953169	1.47852	0.139268
PC10726_c1_g1	11.2651	0.619473	0.48852	1.26806	0.204776
PC10726_c1_g2	32.0522	-0.391221	0.297959	-1.313	0.189182	0.667472
PC10726_c1_g3	5.02157	-0.774266	0.454018	-1.70536	0.0881268
PC10726_c2_g1	20.7429	0.184023	0.372991	0.49337	0.621751	0.878003
PC107260_c0_g1	3.84592	-0.78776	0.679182	-1.15987	0.246103
PC11165_c0_g1	162.087	-1.61476	0.46859	-3.44599	0.000568973	0.0512217
PC107273_c0_g1	223.396	0.650505	0.847182	0.767846	0.442579	0.805705
PC107275_c0_g1	16.1311	0.623992	0.311007	2.00636	0.0448178
PC10728_c0_g1	12.1399	-0.207449	0.334397	-0.620369	0.535015
PC10729_c0_g2	6.88386	-0.934012	0.895732	-1.04274	0.297071
PC107290_c0_g1	25.4719	1.08722	1.07149	1.01468	0.310257	0.745064
PC1073_c0_g2	37.8799	0.408139	0.347257	1.17532	0.239865	0.709993
PC1073_c0_g4	19.1802	0.454336	0.329041	1.38079	0.167344	0.645785
PC1073_c0_g5	839.569	0.406846	0.840439	0.484087	0.628324	0.880553
PC1073_c1_g1	792.309	0.563116	0.824911	0.682638	0.494835	0.82685
PC10730_c0_g1	11.2959	-0.0247355	0.390657	-0.0633176	0.949514
PC10730_c0_g3	8.5766	0.0967221	0.495039	0.195383	0.845093
PC10731_c0_g1	46.9745	1.15862	0.566177	2.04638	0.0407187	0.408277
PC10732_c0_g2	25.8829	0.48089	0.368115	1.30636	0.191431	0.670139
PC10733_c0_g1	26.0234	-0.0219591	0.469806	-0.0467407	0.96272	0.9892
PC10734_c0_g1	17.7496	-0.0710297	0.333716	-0.212845	0.831448
PC107348_c0_g1	4.73388	1.50572	0.983441	1.53107	0.125751
PC10735_c0_g1	28.5916	-0.451852	0.395034	-1.14383	0.252694	0.717497
PC10736_c0_g1	956.402	0.34132	0.231282	1.47577	0.140005	0.619844
PC10737_c0_g2	10.3614	0.00365883	0.331594	0.0110341	0.991196
PC10739_c0_g1	48.8793	0.515118	0.417354	1.23425	0.217111	0.692144
PC10739_c0_g4	4.87057	-0.859388	0.468676	-1.83365	0.0667057
PC2243_c0_g2	780.973	-1.53135	0.268188	-5.70997	1.12998e-08	2.23723e-05
PC10740_c0_g1	41.1332	-0.457867	0.44048	-1.03947	0.298585	0.742359
PC10740_c1_g2	13.8389	-0.0415565	0.271534	-0.153043	0.878364
PC107402_c0_g1	12.8015	-0.557809	0.3535	-1.57796	0.114575
PC107412_c0_g1	17.5878	-0.429714	0.444229	-0.967325	0.333382
PC107429_c0_g1	5.96894	0.917152	0.480089	1.91038	0.0560846
PC10743_c0_g1	12.6406	-0.330629	0.300764	-1.0993	0.271639
PC10743_c0_g2	55.7418	0.0482543	0.174879	0.27593	0.782602	0.93673
PC10743_c0_g3	25.3418	-0.32176	0.239932	-1.34105	0.179906	0.6575
PC10745_c0_g1	15.11	-0.289731	0.28899	-1.00256	0.316071
PC10745_c0_g3	3.77686	-0.591383	0.669763	-0.882973	0.377251
PC10746_c0_g1	32.6752	1.39532	0.754915	1.84831	0.0645572	0.484355
PC10746_c0_g2	6.0652	0.237196	0.525533	0.451344	0.651742
PC10747_c0_g1	83.7702	-0.177923	0.164925	-1.07881	0.280672	0.732958
PC10747_c1_g1	5.01264	0.160856	0.843658	0.190665	0.848788
PC107476_c0_g1	329.758	0.184741	0.160119	1.15378	0.248591	0.714398
PC1075_c0_g1	617.306	-0.0485626	0.0902398	-0.538151	0.590473	0.862767
PC10750_c0_g1	38.82	0.388792	0.53393	0.728171	0.466509	0.813641
PC107531_c0_g1	5.82346	1.05841	0.504128	2.09948	0.0357743
PC10754_c0_g1	360.727	0.07121	0.134655	0.528832	0.596922	0.86541
PC107543_c0_g1	17.4282	-0.287563	0.837375	-0.34341	0.73129
PC107546_c0_g1	34.7779	-0.111943	0.252408	-0.443499	0.657405	0.892522
PC107558_c0_g1	4.46995	-0.690322	0.569129	-1.21295	0.225151
PC10756_c0_g1	118.171	0.12852	0.139889	0.918729	0.358237	0.766693
PC107569_c0_g1	10.9636	0.455832	0.464331	0.981696	0.326249
PC10757_c1_g1	5.65875	0.10397	0.740748	0.140358	0.888377
PC107579_c0_g1	199.497	0.592586	1.02444	0.578447	0.562963	0.853976
PC1076_c0_g1	265.862	0.12639	0.13861	0.911838	0.361854	0.766823
PC107600_c0_g1	400.115	0.175381	0.12538	1.39879	0.161876	0.642324
PC107619_c0_g1	12.2914	0.293082	0.386851	0.757611	0.448684
PC10762_c0_g1	44.1739	-0.204422	0.80037	-0.25541	0.798407	0.942703
PC10763_c0_g1	16.045	-0.922911	0.567069	-1.62751	0.103629
PC10765_c0_g1	57.0886	0.26049	0.289606	0.899464	0.368406	0.770218
PC10765_c0_g3	7.81558	-0.181126	0.42836	-0.422836	0.672415
PC10766_c0_g1	17.0084	1.03069	0.635007	1.62312	0.104564
PC10768_c0_g1	82.7629	0.486966	0.415323	1.1725	0.240997	0.710421
PC10769_c0_g1	37.062	0.591759	0.396125	1.49387	0.13521	0.61395
PC10769_c0_g2	21.2317	-0.343073	0.438049	-0.783185	0.433519	0.799675
PC1077_c0_g1	299.926	0.0740196	0.115045	0.643398	0.519966	0.835842
PC10770_c0_g1	86.6726	-0.162104	0.280303	-0.578315	0.563051	0.853976
PC10770_c1_g2	68.331	0.90184	0.34652	2.60256	0.00925301	0.22221
PC10771_c0_g1	397.03	0.319583	0.188358	1.69668	0.0897576	0.542488
PC107717_c0_g1	15.5615	0.892023	0.827457	1.07803	0.281021
PC10772_c0_g1	10.8057	-0.179403	0.352112	-0.509506	0.610398
PC107731_c0_g1	73.3698	0.222632	0.178363	1.2482	0.211959	0.688383
PC10778_c0_g1	18.3067	0.39785	0.436279	0.911918	0.361812	0.766823
PC10778_c1_g1	49.1161	0.271161	0.373564	0.725877	0.467914	0.81495
PC10778_c2_g1	8.36214	-0.375371	0.526461	-0.713007	0.475841
PC107798_c0_g1	4.32862	0.945095	0.853408	1.10744	0.268105
PC1078_c0_g1	267.23	-0.0131919	0.240778	-0.0547887	0.956307	0.986807
PC10781_c0_g3	42.3402	-0.131018	0.323704	-0.404746	0.685665	0.902219
PC10782_c0_g1	626.395	0.145059	0.184657	0.785558	0.432127	0.798845
PC10783_c0_g1	425.41	0.0591616	0.162368	0.364368	0.715583	0.911549
PC107833_c0_g1	1.82158	2.75915	2.04405	1.34984	0.177066
PC10784_c0_g1	11.0263	0.110698	0.341261	0.324378	0.745652
PC10784_c0_g2	6.73589	-0.252232	0.370615	-0.680576	0.49614
PC10784_c3_g1	15.873	-0.855448	0.418131	-2.04588	0.0407678
PC10785_c0_g1	19.055	0.077127	0.327049	0.235827	0.813567	0.94774
PC10785_c0_g2	28.7773	-0.300435	0.242211	-1.24038	0.214833	0.69026
PC107852_c0_g1	21.1173	-0.777865	0.449305	-1.73126	0.0834048	0.528517
PC107858_c0_g1	32.4237	-0.0677136	0.305208	-0.221861	0.824422	0.950596
PC10786_c0_g1	202.76	0.113806	0.214354	0.530928	0.595468	0.864764
PC10787_c0_g1	41.2771	-0.0391786	0.348798	-0.112325	0.910566	0.974326
PC10788_c0_g1	52.7215	-0.345413	0.321224	-1.0753	0.282239	0.735144
PC10788_c1_g1	29.9813	0.589961	0.270219	2.18327	0.0290158	0.358514
PC10789_c0_g3	5.34403	0.892504	0.675605	1.32105	0.186486
PC1079_c0_g1	8.92746	-0.464951	0.944522	-0.49226	0.622535
PC10790_c0_g1	15.7369	0.25986	0.419463	0.619506	0.535583
PC10792_c0_g2	157.532	-0.542007	0.348928	-1.55335	0.120339	0.59259
PC10793_c0_g1	285.985	-0.311611	0.285089	-1.09303	0.274379	0.72864
PC107931_c0_g1	261.376	-0.0797859	0.142046	-0.561691	0.574326	0.857744
PC10796_c0_g1	125.252	-0.0403506	0.171616	-0.235121	0.814115	0.948114
PC10797_c0_g1	1307.12	-0.143549	0.206073	-0.696594	0.486057	0.823137
PC10798_c0_g2	13.2053	0.0915883	0.588903	0.155524	0.876408
PC108_c0_g1	507.061	-0.133035	0.127062	-1.04701	0.295094	0.740518
PC1080_c0_g1	898.439	-0.166366	0.256655	-0.648209	0.51685	0.834779
PC1080_c0_g2	221.974	-0.0311454	0.399511	-0.0779588	0.937861	0.982177
PC10801_c0_g1	13.7984	-0.383805	0.314581	-1.22005	0.222445
PC10802_c0_g1	181.568	0.0952212	0.287493	0.331213	0.740484	0.922251
PC10808_c0_g1	245.109	0.106056	0.138455	0.765996	0.443679	0.80616
PC10809_c1_g1	23.5494	0.0260062	0.41759	0.0622769	0.950342	0.985346
PC1081_c0_g1	413.904	0.0891697	0.153086	0.582483	0.560242	0.853446
PC1081_c1_g2	21.4977	0.251514	0.263559	0.9543	0.339932	0.755927
PC1081_c10_g1	15.3148	-0.613455	0.366637	-1.67319	0.0942893
PC1081_c2_g1	4231.37	0.255935	0.167418	1.52872	0.126335	0.60111
PC1081_c3_g1	10.6473	-0.435394	0.467995	-0.930339	0.352196
PC1081_c6_g2	14.6187	0.0979461	0.532549	0.183919	0.854077
PC1081_c9_g1	100.027	0.207016	0.196735	1.05226	0.292681	0.739022
PC10811_c0_g1	7.04621	0.490298	0.457408	1.07191	0.283762
PC10813_c0_g1	26.5177	0.516857	0.532219	0.971134	0.331481	0.753566
PC108136_c0_g1	156.868	1.04728	0.884809	1.18362	0.236564	0.707652
PC10815_c0_g1	7.54088	0.925292	0.474039	1.95193	0.0509465
PC108159_c0_g1	17.0203	-0.16849	0.485248	-0.347225	0.728423
PC10816_c0_g1	9.22597	-1.6024	1.0146	-1.57934	0.114258
PC10816_c2_g1	45.4433	-0.148601	0.23597	-0.629746	0.528861	0.840705
PC10817_c0_g1	85.6611	0.10525	0.23118	0.455271	0.648914	0.890185
PC10817_c0_g2	62.1562	0.350809	0.287398	1.22064	0.222223	0.695679
PC10818_c0_g1	36.8498	-0.480112	0.65446	-0.7336	0.463192	0.813547
PC1082_c0_g1	71.4602	0.241792	0.17645	1.37032	0.170588	0.648526
PC1082_c1_g1	47.9483	-0.322085	0.44199	-0.728715	0.466176	0.813641
PC108236_c0_g1	4.769	0.0316239	0.459561	0.0688134	0.945138
PC10824_c0_g1	86.3158	0.393673	0.180384	2.18242	0.0290786	0.358514
PC10827_c0_g1	14.0359	-0.181449	0.370061	-0.490323	0.623906
PC10829_c0_g1	9.23363	-0.492146	0.315024	-1.56225	0.118229
PC1083_c0_g1	251.692	0.10796	0.164931	0.65458	0.512738	0.833508
PC10830_c0_g1	233.776	-0.00984686	0.147872	-0.0665904	0.946908	0.984394
PC10831_c0_g1	24.8721	-0.645825	0.943072	-0.684809
PC10832_c0_g1	125.793	0.152243	0.153244	0.99347	0.320481	0.749626
PC10833_c0_g1	779.699	0.760144	0.757698	1.00323	0.315751	0.746732
PC10834_c0_g1	1217.26	0.809917	0.487781	1.66041	0.0968319	0.557744
PC10836_c0_g1	349.265	0.183641	0.136675	1.34363	0.179067	0.656494
PC10837_c0_g1	193.332	0.261981	0.250548	1.04563	0.295731	0.740949
PC10838_c0_g1	48.9835	0.25928	0.404832	0.640463	0.521872	0.836487
PC10838_c0_g2	145.444	-0.0527995	0.287495	-0.183653	0.854285	0.958597
PC10841_c0_g1	74.0504	0.0783951	0.165472	0.473767	0.635666	0.88395
PC10843_c0_g1	22248.2	0.146282	0.366343	0.399303	0.68967	0.903236
PC10844_c0_g1	228.315	-0.126511	0.117695	-1.07491	0.282416	0.735189
PC10847_c0_g1	38.1552	0.230345	0.285724	0.806179	0.42014	0.792529
PC108471_c0_g1	62.6929	-0.132427	0.496107	-0.266932	0.789522	0.93974
PC10848_c0_g1	56.3777	0.365012	0.189721	1.92394	0.0543622	0.45414
PC1085_c0_g1	1104.06	-0.156226	0.145036	-1.07716	0.281411	0.733858
PC10851_c0_g1	202.42	-0.424545	0.175982	-2.41243	0.0158464	0.284697
PC10852_c0_g1	5.30433	0.76857	0.504087	1.52468	0.127339
PC108535_c0_g1	10.5527	-0.402732	0.371236	-1.08484	0.277991
PC10854_c0_g1	388.926	-0.21942	0.14606	-1.50226	0.13303	0.610988
PC108544_c0_g1	235.824	0.710372	0.631445	1.12499	0.260592	0.723004
PC10857_c0_g1	17.5575	-1.04068	0.462421	-2.2505	0.0244172
PC1086_c0_g1	450.529	0.113243	0.346033	0.327261	0.74347	0.923198
PC10861_c0_g3	10.3254	-0.609077	0.338844	-1.79751	0.072254
PC10862_c0_g1	6.73453	-0.450529	0.498725	-0.903362	0.366334
PC10863_c0_g1	34.7869	-0.477326	0.222337	-2.14685	0.031805	0.369571
PC10866_c0_g1	131.234	-0.683727	0.278346	-2.45639	0.0140341	0.26871
PC10867_c0_g1	248.836	0.0381712	0.171608	0.222433	0.823977	0.950596
PC10868_c0_g1	494.19	-0.087348	0.129916	-0.67234	0.501367	0.829588
PC10869_c0_g1	5.12554	0.126004	0.522454	0.241177	0.809418
PC10869_c0_g3	9.01528	0.0257008	0.75782	0.0339141	0.972946
PC10869_c0_g4	17.1711	0.425465	0.39753	1.07027	0.284496
PC1087_c0_g1	1177.01	-0.176112	0.116715	-1.50891	0.131321	0.608055
PC1087_c0_g2	2.6241e+06	0.216461	0.10716	2.01999	0.0433848	0.416976
PC1087_c0_g3	202.138	-0.332299	0.174257	-1.90695	0.0565271	0.462254
PC1087_c0_g4	279.228	-0.424025	0.173527	-2.44356	0.014543	0.271457
PC1087_c0_g6	116.416	-0.166822	0.172615	-0.966439	0.333824	0.753621
PC108706_c0_g1	1630.21	-0.153251	0.11299	-1.35633	0.174994	0.652288
PC10871_c0_g1	72.0839	0.0881977	0.167063	0.527929	0.597548	0.86541
PC108747_c0_g1	9.10433	-1.00281	0.738997	-1.35699	0.174784
PC10875_c0_g1	14.5745	-0.208214	0.427191	-0.487401	0.625974
PC10877_c0_g1	18.6089	-0.396727	0.478612	-0.828912	0.407154	0.786614
PC10878_c0_g1	105.748	-0.132036	0.134765	-0.979751	0.327209	0.752642
PC10878_c0_g2	10.6345	-0.104087	0.936611	-0.111131	0.911512
PC1088_c0_g1	2364.14	-0.142266	0.0822464	-1.72975	0.0836744	0.529239
PC10882_c1_g1	53.9111	0.578924	0.297608	1.94526	0.0517439	0.446052
PC10883_c0_g1	153.205	-0.348864	0.249208	-1.39989	0.161546	0.642256
PC108840_c0_g1	950.765	0.112945	0.103991	1.0861	0.277433	0.730363
PC10886_c0_g1	62.9645	0.591351	0.279011	2.11946	0.0340519	0.38006
PC10887_c0_g1	31.3777	0.684847	0.554992	1.23398	0.217212	0.692144
PC10888_c0_g1	29.6662	0.701517	0.278683	2.51725	0.0118273	0.24943
PC108889_c0_g1	12.6156	-1.44185	1.94543	-0.741146	0.458605
PC1089_c0_g1	910.557	-0.0437702	0.182734	-0.239529	0.810695	0.947019
PC1089_c1_g2	28.019	0.512474	0.272113	1.88332	0.0596576	0.471435
PC10891_c0_g1	103.822	0.0192407	0.324302	0.0593296	0.95269	0.985772
PC10892_c0_g2	13.5759	0.527401	0.331681	1.59009	0.111815
PC10893_c0_g1	3.91798	0.703715	0.507941	1.38543	0.165922
PC10894_c0_g1	2024.78	-0.332383	0.396363	-0.838582	0.401704	0.783011
PC10894_c1_g1	9.10932	0.33738	0.36187	0.932324	0.351169
PC10896_c0_g1	1254.01	0.0607446	0.103378	0.587599	0.556801	0.851496
PC108960_c0_g1	68.0913	2.40065	1.74176	1.37829	0.168113	0.646789
PC10897_c0_g1	67.5367	0.505831	0.358659	1.41034	0.158439	0.63855
PC10899_c0_g1	9.27662	0.727424	0.40572	1.79292	0.0729855
PC10899_c0_g2	20.1721	0.35343	0.539682	0.654886	0.512541	0.833497
PC109_c0_g1	311.571	-0.0364559	0.101861	-0.357898	0.72042	0.912897
PC109_c0_g2	69.8391	-0.235284	0.175698	-1.33914	0.180526	0.657965
PC109_c1_g1	520.286	-0.265689	0.394102	-0.674163	0.500208	0.828833
PC109_c14_g1	9.03269	-0.354326	0.514627	-0.68851	0.491132
PC109_c2_g1	280.724	-0.139559	0.144594	-0.965176	0.334457	0.753621
PC109_c2_g2	29.7408	-0.0813206	0.209663	-0.387863	0.698118	0.906093
PC109_c2_g3	24.3071	-0.304187	0.278144	-1.09363	0.274116	0.72864
PC109_c2_g5	623.76	0.320733	0.343994	0.93238	0.35114	0.763324
PC109_c4_g1	12.8243	-0.0928319	0.389578	-0.238288	0.811658
PC1090_c0_g1	167.13	-0.0140103	0.292976	-0.0478205	0.961859	0.988791
PC1090_c1_g1	9.99882	0.161795	0.402153	0.402323	0.687446
PC10900_c0_g1	30.909	-0.191951	0.209228	-0.917427	0.358919	0.766743
PC10900_c1_g1	69.6787	0.236343	0.32215	0.733644	0.463166	0.813547
PC10901_c0_g1	435.218	-0.186821	0.465953	-0.400943	0.688462	0.903187
PC10902_c0_g1	14.3522	0.150036	0.346638	0.432832	0.665137
PC10903_c0_g1	22.01	-0.609685	0.243546	-2.50336	0.0123019	0.253712
PC10903_c2_g1	4.30289	1.54993	0.769711	2.01365	0.0440463
PC10905_c0_g1	27.1509	0.396037	0.336996	1.1752	0.239916	0.709993
PC10907_c0_g1	317.877	0.0856937	0.155448	0.551269	0.581449	0.859112
PC10908_c0_g1	1550.81	0.0861496	0.151801	0.567515	0.570364	0.856025
PC1091_c0_g1	217.989	-0.0564847	0.151081	-0.373871	0.7085	0.909931
PC10911_c0_g1	153.516	0.345562	0.1645	2.10069	0.0356685	0.387628
PC10912_c0_g1	16.5286	0.125157	0.457926	0.273312	0.784613
PC10915_c0_g1	202.653	0.0197702	0.159286	0.124117	0.901222	0.972485
PC10917_c0_g1	554.446	0.35582	0.344695	1.03227	0.301944	0.743526
PC10917_c1_g1	20.8982	-0.184337	0.358043	-0.514846	0.60666	0.870245
PC10918_c0_g1	4005.62	-0.11796	0.102267	-1.15345	0.248726	0.714502
PC10919_c0_g1	92.7126	-0.750918	0.504326	-1.48895	0.136499	0.615652
PC1092_c0_g1	588.556	-0.226723	0.159305	-1.4232	0.154679	0.633294
PC10920_c0_g1	177.619	0.577395	0.389452	1.48258	0.138185	0.617177
PC10921_c0_g2	37.3109	0.0970519	0.348626	0.278384	0.780718	0.936556
PC10922_c0_g1	1252.57	0.115878	0.134776	0.859779	0.389911	0.777882
PC10923_c0_g1	8.43063	-0.265048	0.784996	-0.337643	0.735633
PC10924_c1_g1	6.55242	-0.0444239	0.431726	-0.102898	0.918044
PC10924_c1_g4	4.82265	-0.667195	0.752269	-0.886911	0.375127
PC10925_c0_g1	11.4535	0.173864	0.281688	0.617223	0.537088
PC10926_c0_g1	276.502	-0.657957	0.303934	-2.1648	0.0304028	0.363
PC10926_c1_g1	11.5124	1.43832	0.541876	2.65434	0.00794631
PC10926_c3_g4	7.89451	0.148021	0.374112	0.395658	0.692357
PC10927_c0_g1	25.7113	-0.462003	0.262241	-1.76175	0.0781119	0.51679
PC10928_c2_g1	53.7796	-0.180868	0.433466	-0.417259	0.676489	0.900345
PC10929_c0_g1	24.4404	0.779242	0.458472	1.69965	0.0891968	0.542015
PC1093_c0_g1	260.114	0.202004	0.18122	1.11469	0.264985	0.724635
PC10930_c0_g1	2142.69	0.126095	0.151996	0.829593	0.406769	0.786482
PC10930_c1_g1	26.737	0.121052	0.301346	0.401704	0.687902	0.903187
PC10930_c2_g2	4.08119	0.566737	1.01816	0.55663	0.57778
PC109300_c0_g1	19.5161	-0.216355	0.447136	-0.483868	0.628479	0.880553
PC10931_c0_g2	64.3013	0.0484329	0.284361	0.170322	0.864757	0.962016
PC10931_c1_g1	76.191	0.00716708	0.24411	0.0293601	0.976577	0.992638
PC109319_c0_g1	60.203	2.22171	1.53429	1.44804	0.147607	0.627241
PC10932_c2_g1	15.1042	-0.479042	0.63343	-0.756266	0.44949
PC10933_c0_g1	463.261	-0.0239991	0.202805	-0.118336	0.905801	0.973138
PC10933_c0_g2	5.94207	-0.637429	0.444934	-1.43264	0.151962
PC10934_c0_g1	2861.35	0.288111	0.346245	0.832101	0.405352	0.785081
PC10935_c0_g1	31.9031	-0.435903	0.338614	-1.28731	0.197985	0.674998
PC10937_c0_g1	4.42198	-0.164253	0.578617	-0.283872	0.776508
PC10938_c0_g1	26.2266	-0.0449864	0.346475	-0.12984	0.896693	0.970786
PC10939_c2_g1	14.8158	-0.382231	0.279859	-1.3658	0.172002
PC1094_c0_g1	275.537	-0.171912	0.15446	-1.11299	0.265715	0.724919
PC1094_c1_g1	212.079	-0.239433	0.193523	-1.23724	0.215999	0.690928
PC10940_c0_g1	26.2311	0.627913	0.584103	1.075	0.282373	0.735185
PC10940_c0_g2	24.9091	-1.01696	0.383209	-2.6538	0.00795918	0.207043
PC10941_c0_g1	6.78776	0.90683	0.584253	1.55212	0.120634
PC10942_c0_g1	48.6123	0.693845	0.600657	1.15514	0.248032	0.714398
PC10942_c0_g2	21.7521	-1.26963	0.500935	-2.53452	0.0112603	0.245977
PC109436_c0_g1	6717.63	0.983577	0.898146	1.09512	0.273464	0.72864
PC10945_c0_g1	264.365	0.0152467	0.135116	0.112841	0.910157	0.974326
PC10946_c0_g1	10.446	0.0918138	0.533487	0.172101	0.863358
PC10946_c1_g1	80.9129	0.200648	0.444808	0.45109	0.651925	0.891578
PC10946_c1_g3	17.9258	-0.58571	0.370352	-1.58149	0.113765
PC10946_c1_g4	7.88382	-0.525418	0.576343	-0.91164	0.361958
PC10947_c0_g1	18.3325	0.0177623	0.401596	0.0442292	0.964722	0.989716
PC10949_c0_g1	15.3101	0.905219	0.3956	2.28822	0.0221249
PC13124_c0_g1	26.8295	-1.50593	0.405196	-3.71654	0.000201972	0.0294995
PC1095_c0_g1	166.116	-0.0929289	0.217782	-0.426707	0.669593	0.896963
PC1095_c0_g2	60.0119	-0.0840349	0.231218	-0.363444	0.716273	0.911712
PC10950_c0_g1	754.427	-0.339796	0.31302	-1.08554	0.277682	0.730363
PC10951_c0_g1	1062.98	-0.0288435	0.396189	-0.0728022	0.941964	0.983234
PC10953_c0_g3	7.20936	-0.379954	0.776905	-0.489062	0.624798
PC10953_c0_g4	6.56926	0.149526	0.507783	0.294468	0.7684
PC10953_c0_g5	5.45356	0.771381	0.615146	1.25398	0.209849
PC10954_c0_g2	437.554	-0.066394	0.424906	-0.156256	0.875831	0.965402
PC10955_c0_g2	5.45605	0.548359	0.486128	1.12801	0.259315
PC10956_c0_g1	69.0922	0.377407	0.207551	1.81838	0.0690056	0.497054
PC10957_c0_g1	9.70607	-0.255468	0.366832	-0.696415	0.486169
PC10958_c0_g1	25.3576	0.0267151	0.357579	0.0747111	0.940445	0.983042
PC1096_c0_g1	84.2398	0.290341	0.323258	0.898169	0.369095	0.770491
PC1096_c1_g1	42.6595	-0.468838	0.265289	-1.76728	0.077182	0.516397
PC1096_c2_g1	10.2023	-0.212095	0.429359	-0.49398	0.62132
PC10960_c0_g1	1321.88	0.775369	0.731477	1.06	0.289143	0.737727
PC10961_c0_g1	14.052	-0.552408	0.383138	-1.4418	0.149359
PC10964_c0_g2	44.2061	-0.463145	0.395646	-1.17061	0.241757	0.710555
PC10965_c0_g2	6.35727	-0.221088	0.529368	-0.417646	0.676206
PC10965_c0_g3	26.1562	0.251651	0.230719	1.09073	0.275394	0.728979
PC10965_c0_g4	7.33612	0.283366	0.413389	0.685472	0.493046
PC10965_c1_g1	2603.73	0.234296	0.0901048	2.60026	0.0093152	0.223138
PC10967_c0_g1	561.588	-0.183094	0.169066	-1.08297	0.278821	0.731185
PC10968_c0_g1	22.9571	-0.0454989	0.296339	-0.153537	0.877975	0.965874
PC10969_c0_g1	11.5001	-0.170196	0.40763	-0.417526	0.676294
PC10969_c1_g1	46.0405	0.458875	0.225513	2.0348	0.0418706	0.413806
PC1097_c0_g1	725.156	-0.244118	0.128085	-1.9059	0.0566627	0.462419
PC10970_c0_g2	6.70982	0.258946	0.513626	0.504153	0.614154
PC10971_c0_g1	7.76885	0.955526	0.354686	2.69401	0.00705986
PC10973_c0_g1	7.03679	-0.646217	0.462638	-1.39681	0.162471
PC10974_c1_g1	9.34616	-0.142033	0.328135	-0.432848	0.665125
PC10977_c0_g1	6.84871	0.283338	1.17628	0.240876	0.809651
PC10977_c1_g7	4.73346	-0.250479	0.581424	-0.430803	0.666612
PC109787_c0_g1	6.56562	0.601394	0.426182	1.41112	0.158209
PC10979_c0_g2	4.0728	-0.962246	1.37666	-0.698972	0.48457
PC1098_c0_g1	492.292	-0.576953	0.327462	-1.76189	0.0780875	0.51679
PC1098_c0_g2	357.978	-0.527145	0.175213	-3.00859	0.00262461	0.112698
PC1098_c0_g4	384.464	-0.184126	0.133482	-1.37941	0.167767	0.646277
PC1098_c1_g1	50.5581	-0.37937	0.284558	-1.33319	0.182469	0.660185
PC1098_c2_g1	168.05	0.241464	0.208275	1.15935	0.246314	0.712791
PC1098_c3_g1	145.261	0.228621	0.192499	1.18764	0.234974	0.706631
PC1098_c3_g2	28.1333	0.197034	0.286471	0.687798	0.49158	0.825454
PC1098_c4_g1	89.7626	0.420971	0.221468	1.90082	0.0573252	0.464942
PC1098_c5_g1	27.0348	-0.0517253	0.21487	-0.240728	0.809766	0.947019
PC10981_c0_g1	14.8788	-0.382623	0.557553	-0.686255	0.492552
PC10984_c0_g1	22.4074	-0.782698	0.397463	-1.96923	0.0489264	0.436783
PC10984_c0_g2	10.385	-0.631907	0.421239	-1.50012	0.133584
PC10987_c0_g1	103.166	0.0628968	0.304266	0.206717	0.836231	0.953835
PC10988_c0_g1	46.8877	-0.428709	0.46808	-0.91589	0.359725	0.766743
PC109881_c0_g1	7499.31	0.662508	0.991366	0.668278	0.503956	0.830377
PC1099_c0_g1	1059.43	-0.092465	0.136999	-0.67493	0.49972	0.828481
PC10991_c0_g1	13.9874	-0.91687	0.616451	-1.48734	0.136926
PC109917_c0_g1	22.0015	0.924412	0.756323	1.22225	0.221615	0.695361
PC10992_c0_g1	2269.5	0.0150032	0.171219	0.0876259	0.930174	0.979944
PC10992_c1_g1	1193.22	-0.348988	0.281884	-1.23805	0.215696	0.69053
PC10992_c2_g1	4.82276	-0.244763	0.448574	-0.545648	0.585308
PC10998_c0_g1	54.0557	0.387555	0.277381	1.3972	0.162355	0.64246
PC10998_c0_g2	28.4382	0.127509	0.347791	0.366626	0.713898	0.911212
PC10998_c1_g1	23.1587	-0.0403855	0.257096	-0.157083	0.875179	0.965402
PC11_c0_g1	263.477	0.0338971	0.133962	0.253034	0.800242	0.943464
PC11_c1_g1	54.1916	0.0812626	0.199188	0.40797	0.683296	0.901766
PC110_c0_g1	44.0227	0.740159	0.350439	2.11209	0.0346789	0.38207
PC110_c0_g2	176.227	-0.166034	0.174298	-0.952587	0.340799	0.756496
PC1100_c0_g1	1000.17	-0.0949316	0.331039	-0.286769	0.774289	0.933738
PC11000_c0_g1	8.87347	1.67092	1.03303	1.61749	0.105772
PC110013_c0_g1	4.82745	0.0506191	0.450674	0.112318	0.910571
PC11002_c0_g1	99.81	0.322905	0.358635	0.900374	0.367921	0.769934
PC11003_c0_g2	314.274	0.384967	0.189574	2.0307	0.0422858	0.414486
PC11004_c0_g1	98.119	-0.0906868	0.232699	-0.389717	0.696745	0.905601
PC11006_c2_g1	9.13911	0.881212	0.383986	2.29491	0.0217384
PC11008_c0_g1	4444.62	0.197259	0.0991228	1.99004	0.046586	0.427891
PC11008_c0_g2	9.45244	-0.285693	0.477644	-0.598129	0.549754
PC11009_c0_g2	45.2234	0.445599	0.376216	1.18442	0.236245	0.707391
PC1101_c0_g1	8.78897	-0.263166	1.08617	-0.242289	0.808557
PC11010_c0_g1	3.66483	0.429579	0.531366	0.808443	0.418836
PC11012_c0_g1	317.684	0.206338	0.434598	0.474778	0.634945	0.883797
PC110172_c0_g1	65.9586	2.15119	1.41535	1.5199	0.128537	0.603917
PC11018_c0_g1	10.187	-0.199721	0.459382	-0.434759	0.663737
PC11018_c0_g2	10.3201	0.163334	0.799455	0.204307	0.838114
PC11018_c0_g3	6.15531	1.28479	0.417618	3.07648	0.00209461
PC1102_c0_g1	3734.18	-0.0303073	0.285761	-0.106058	0.915536	0.975912
PC11021_c0_g1	41.5937	0.017422	0.297984	0.0584663	0.953377	0.986139
PC11023_c0_g1	37.9945	0.145808	0.211186	0.690426	0.489927	0.824733
PC11023_c1_g1	17.6272	-0.185101	0.258552	-0.715917	0.474043
PC11024_c0_g1	289.008	-0.0510264	0.157685	-0.323596	0.746244	0.923791
PC11024_c0_g2	689.105	0.0279394	0.168073	0.166233	0.867973	0.963079
PC110274_c0_g1	2.54723	0.0380721	1.27	0.0299781	0.976085
PC11028_c0_g1	11.8136	-0.2108	0.422028	-0.499494	0.617432
PC11029_c0_g1	568.948	-0.277837	0.154345	-1.80011	0.0718434	0.504085
PC1103_c0_g1	136.23	-0.298861	0.232795	-1.2838	0.199214	0.674998
PC1103_c0_g2	118.485	-0.137429	0.178787	-0.768677	0.442085	0.805142
PC11031_c0_g1	410.264	-0.379684	0.215012	-1.76588	0.0774167	0.516397
PC1104_c0_g1	226.882	0.0980499	0.259721	0.37752	0.705787	0.909161
PC1104_c0_g2	4.57976	-0.0557843	0.822706	-0.0678059	0.94594
PC1104_c0_g3	2274	0.0778024	0.201435	0.38624	0.699319	0.906662
PC1104_c1_g1	11.3038	-0.0393985	0.3145	-0.125274	0.900307
PC11044_c1_g1	7.49176	0.32069	1.81724	0.176471	0.859924
PC11046_c1_g2	131.549	-0.122816	0.301208	-0.407746	0.68346	0.90181
PC11049_c0_g1	167.465	-0.45584	0.429502	-1.06132	0.288544	0.737459
PC1105_c0_g1	153.76	0.130302	0.17285	0.753843	0.450943	0.808657
PC11051_c0_g1	1125.77	0.190827	0.232652	0.820223	0.412089	0.789083
PC11054_c0_g1	665.722	-0.0778433	0.125043	-0.622531	0.533593	0.842663
PC11055_c0_g2	6.12698	-3.13594	1.34663	-2.32873	0.0198734
PC11055_c0_g3	6.44468	0.503978	0.646368	0.779706	0.435564
PC11056_c0_g1	107.58	0.220842	0.543146	0.406599	0.684303	0.901973
PC11059_c1_g1	57.9931	0.491511	0.391048	1.25691	0.208787	0.685382
PC1106_c0_g1	313.732	-0.0453744	0.110093	-0.412147	0.680231	0.900811
PC1106_c1_g1	55.2874	-0.0926496	0.161978	-0.57199	0.567328	0.855019
PC1106_c1_g2	10.8192	-0.658491	0.333288	-1.97575	0.0481836
PC1106_c1_g3	140.948	-0.1528	0.172678	-0.884888	0.376217	0.771333
PC11061_c0_g1	38.9774	0.107138	0.529902	0.202185	0.839772	0.954944
PC11061_c0_g2	306.516	-0.195489	0.150464	-1.29924	0.193861	0.671726
PC11061_c0_g4	73.7978	-0.239729	0.289889	-0.826966	0.408256	0.786814
PC11061_c1_g1	5.62265	0.096485	0.39887	0.241896	0.808861
PC11062_c0_g1	39.7285	-0.265244	0.457846	-0.579329	0.562367	0.853976
PC110626_c0_g1	3.06909	1.84648	1.12568	1.64032	0.100938
PC11063_c0_g2	32.4447	-0.285452	0.313289	-0.911145	0.362219	0.766823
PC11065_c0_g1	4277.73	0.0817571	0.0812744	1.00594	0.314445	0.746605
PC11065_c0_g2	7.68569	0.138524	0.363497	0.381087	0.703139
PC11066_c0_g1	12.7403	0.443667	0.342166	1.29664	0.194755
PC110662_c0_g1	20.6331	-1.66403	2.08391	-0.798514	0.424572	0.795331
PC11068_c0_g1	7.81928	0.114774	0.664054	0.172839	0.862778
PC11069_c0_g1	24.6594	0.00498686	0.348398	0.0143137	0.98858	0.996625
PC11069_c1_g1	7.86449	-0.0268174	0.368557	-0.0727632	0.941995
PC1107_c0_g1	7.81507	0.183664	0.347627	0.528335	0.597267
PC11070_c0_g1	21.8291	0.873623	0.465364	1.87729	0.060478	0.474739
PC11070_c2_g1	19.9219	0.0276489	0.223209	0.12387	0.901418	0.972485
PC11070_c9_g1	4.32665	0.126763	0.546738	0.231853	0.816652
PC11071_c0_g2	5.48552	0.382378	0.47921	0.797936	0.424908
PC11072_c0_g3	18.0726	-0.261969	0.672596	-0.389489	0.696915
PC11072_c0_g4	51.2521	0.0860382	0.204378	0.420977	0.673772	0.898918
PC11072_c0_g5	14.8136	-0.0270153	0.337822	-0.0799689	0.936262
PC11072_c0_g6	14.9086	-0.335622	0.255866	-1.31171	0.189619
PC11073_c0_g1	7.41197	0.463073	0.523611	0.884383	0.376489
PC110730_c0_g1	78.8306	0.788297	0.804761	0.979541	0.327313	0.752642
PC11074_c0_g1	1254.3	-0.226022	0.169915	-1.33021	0.183449	0.661826
PC11074_c0_g2	44.4654	-0.085747	0.361151	-0.237427	0.812325	0.947058
PC11075_c0_g1	12.0148	-0.333384	0.427872	-0.779169	0.43588
PC11077_c0_g1	102.503	0.113003	0.148515	0.760883	0.446727	0.807161
PC11078_c0_g4	35.8199	0.155455	0.197331	0.787789	0.43082	0.798544
PC11078_c8_g1	7.07655	-1.55437	0.634339	-2.45037	0.0142709
PC11079_c0_g1	686.053	0.0293016	0.18092	0.161959	0.871339	0.964252
PC1108_c0_g1	2315.92	-0.0133592	0.121281	-0.110151	0.912289	0.974779
PC11081_c0_g1	5.86576	-0.0371506	0.473279	-0.0784961	0.937433
PC11081_c0_g2	1.53212	-0.431499	1.18779	-0.36328	0.716396
PC11081_c1_g1	19.4852	0.326751	0.315729	1.03491	0.300712	0.743526
PC11081_c2_g2	5.92686	-0.237637	0.566775	-0.419278	0.675013
PC11082_c0_g1	32.14	0.397514	0.193314	2.05631	0.0397524	0.404318
PC11082_c0_g2	53.7651	0.110146	0.206641	0.533033	0.594011	0.864194
PC11083_c0_g1	71.2074	-0.550704	0.366658	-1.50196	0.133108	0.610988
PC11083_c1_g1	115.68	-0.137476	0.209493	-0.65623	0.511676	0.833339
PC11085_c0_g2	15.8721	-0.21703	0.378717	-0.573067	0.566599
PC4234_c0_g1	541.424	-1.49483	0.450738	-3.3164	0.000911858	0.066745
PC110882_c0_g1	135.652	0.80619	0.852313	0.945886	0.344207	0.758336
PC11089_c0_g1	51.1003	0.431439	0.228687	1.88659	0.059215	0.471265
PC1109_c0_g1	105.375	-0.498211	0.393085	-1.26744	0.204999	0.681125
PC1109_c1_g1	679.031	-0.0268744	0.251139	-0.10701	0.914781	0.975668
PC1109_c1_g2	161.649	0.045886	0.121195	0.378612	0.704976	0.90892
PC1109_c1_g3	210.511	-0.202913	0.122303	-1.65911	0.0970945	0.558466
PC1109_c2_g1	80.6621	0.0968509	0.239965	0.403604	0.686504	0.902414
PC1109_c5_g1	61.3943	0.0701919	0.268374	0.261545	0.793672	0.941199
PC11090_c0_g1	59.0724	-0.0895472	0.41952	-0.213451	0.830975	0.951799
PC11091_c0_g1	48.9376	-0.139586	0.358083	-0.389814	0.696674	0.905601
PC11092_c0_g1	22.225	-0.0621801	0.388163	-0.160191	0.872731	0.964763
PC11094_c0_g1	18.745	-0.651343	0.564749	-1.15333	0.248774	0.714523
PC11095_c0_g1	7.15597	0.237076	0.421133	0.562949	0.57347
PC11098_c0_g1	228.795	0.0589468	0.11848	0.497527	0.618818	0.876751
PC11098_c3_g1	11.9434	0.069787	0.343599	0.203106	0.839052
PC11098_c4_g1	32.3227	0.194082	1.54775	0.125397	0.90021	0.972172
PC11099_c0_g1	50.852	-0.55036	0.238712	-2.30554	0.0211362	0.318994
PC11099_c0_g3	7.27052	-0.461364	0.371841	-1.24075	0.214697
PC111_c0_g1	2215.17	0.0293477	0.146491	0.200338	0.841217	0.955016
PC1110_c0_g1	293.589	-0.126016	0.150898	-0.835108	0.403657	0.783787
PC11100_c0_g1	159.591	0.141862	0.187054	0.758399	0.448212	0.807976
PC11102_c0_g1	5.54147	0.149287	0.524412	0.284675	0.775893
PC11106_c0_g1	273.316	0.367589	0.176091	2.0875	0.0368433	0.393264
PC11106_c0_g2	6.33261	0.0210474	0.471594	0.0446304	0.964402
PC1111_c0_g1	1240.12	0.132633	0.166835	0.794995	0.426616	0.796437
PC11110_c0_g1	7.43094	-0.0376196	0.408173	-0.092166	0.926566
PC11110_c0_g2	119.428	0.194202	0.304892	0.636954	0.524155	0.837874
PC11112_c0_g1	72.1251	0.0298265	0.16044	0.185905	0.85252	0.958187
PC11113_c0_g1	7.25999	0.536733	0.449973	1.19281	0.232944
PC11115_c0_g1	8.43627	-0.301253	0.48162	-0.6255	0.531643
PC1112_c0_g1	118.867	0.313	0.286036	1.09427	0.273837	0.72864
PC11122_c0_g1	38.6483	-0.00390283	0.282405	-0.0138199	0.988974	0.996625
PC11124_c1_g1	6.61446	0.647933	0.817221	0.792849	0.427866
PC11125_c0_g1	18.6565	-0.0101059	0.249982	-0.0404267	0.967753	0.990703
PC11126_c0_g1	19.9846	0.392898	0.319662	1.2291	0.219033	0.693274
PC111284_c0_g1	26.67	0.293363	0.255749	1.14708	0.251351	0.716105
PC11129_c0_g1	11.7636	0.0457086	0.394211	0.11595	0.907693
PC1113_c0_g1	20.0039	-0.216672	0.269958	-0.802612	0.422199	0.793444
PC1113_c1_g1	70.0615	0.353691	0.226964	1.55836	0.119147	0.592235
PC1113_c2_g1	172.786	-0.0975859	0.136347	-0.715718	0.474165	0.816849
PC11132_c0_g1	482.149	-0.131866	0.227648	-0.579253	0.562419	0.853976
PC11132_c2_g1	55.6019	-0.406463	0.24988	-1.62663	0.103815	0.570421
PC11133_c0_g1	6776.97	-0.284271	0.301354	-0.943311	0.345522	0.759443
PC11137_c0_g1	9.06552	0.246423	0.358876	0.686651	0.492302
PC11138_c0_g1	940.481	-0.320981	0.309621	-1.03669	0.299881	0.743235
PC11138_c0_g2	53.6019	0.150265	0.275956	0.544528	0.586078	0.860889
PC11138_c1_g1	34.5178	0.0233967	0.204366	0.114484	0.908854	0.97415
PC11139_c0_g1	5832.98	-0.067544	0.349884	-0.193047	0.846922	0.956709
PC11141_c1_g2	42.7683	0.448638	0.204063	2.19853	0.0279111	0.352696
PC11143_c0_g1	23.5232	0.28596	0.21892	1.30623	0.191475	0.670139
PC11144_c0_g1	6.56897	0.668028	0.435061	1.53548	0.124666
PC11147_c0_g1	36.2166	-0.0375654	0.385842	-0.0973596	0.922441	0.978198
PC11147_c0_g2	59834.7	0.228079	0.371737	0.61355	0.539513	0.844333
PC11147_c0_g3	65077.7	0.227248	0.340428	0.667538	0.504429	0.830475
PC111486_c0_g1	24.4059	-0.582838	0.280487	-2.07795	0.0377139	0.396007
PC11149_c0_g1	7061.07	-0.612044	0.30102	-2.03324	0.0420287	0.414438
PC1115_c0_g1	7626.72	0.257412	0.240537	1.07016	0.284549	0.736118
PC11150_c0_g2	8.0699	0.481641	0.398769	1.20782	0.227117
PC11150_c1_g1	3.69511	-0.679944	1.11372	-0.610516	0.54152
PC11151_c0_g1	29.9901	0.10513	0.279343	0.376348	0.706658	0.909313
PC11153_c0_g1	22.4258	-0.0699065	0.223679	-0.31253	0.754637	0.926235
PC11153_c0_g2	15.9937	-0.0234179	0.275818	-0.0849037	0.932338
PC11154_c0_g1	43.4848	-0.544296	0.236141	-2.30496	0.0211685	0.318994
PC11155_c0_g1	250.615	0.127807	0.174166	0.733823	0.463057	0.813547
PC11157_c0_g1	40.2853	0.309935	0.561342	0.552132	0.580858	0.859112
PC11158_c0_g1	16.3402	0.274444	0.3847	0.713397	0.4756
PC11158_c0_g2	7.3323	-0.0721661	0.533943	-0.135157	0.892488
PC1116_c0_g1	65.4601	-0.290141	0.30704	-0.944959	0.34468	0.758815
PC11160_c0_g1	70.7963	0.524795	0.350186	1.49862	0.133972	0.611915
PC11161_c1_g1	3.52605	-0.251852	1.52693	-0.16494	0.868991
PC11161_c2_g1	94.2741	-0.287778	0.166299	-1.73048	0.0835446	0.529027
PC11163_c0_g1	22.4284	-0.370887	0.485837	-0.763399	0.445226	0.806623
PC111631_c0_g1	8.81897	0.349992	0.668907	0.523229	0.600815
PC11164_c0_g1	3.93876	0.146564	0.597702	0.245213	0.806292
PC4762_c3_g1	115.239	-1.47633	0.454966	-3.24492	0.00117482	0.0747646
PC11165_c1_g1	21.2036	-0.122791	0.490149	-0.250517	0.802187	0.944206
PC11166_c1_g2	4.12739	0.669085	0.680533	0.983179	0.32552
PC11167_c0_g2	7.35993	0.639627	0.49791	1.28463	0.198923
PC11167_c0_g3	6.29332	0.0469865	0.70033	0.067092	0.946508
PC11168_c0_g1	479.9	-0.235814	0.172539	-1.36673	0.171708	0.649294
PC111697_c0_g1	6.20655	0.407591	0.457865	0.8902	0.373358
PC1117_c0_g1	608.626	-0.0806604	0.0964792	-0.836039	0.403133	0.783787
PC11170_c0_g1	169.766	0.319946	0.205863	1.55417	0.120144	0.592313
PC11171_c0_g1	16.9723	0.449171	0.910703	0.493213	0.621862
PC11172_c0_g1	13.0108	0.135327	0.365278	0.370476	0.711028
PC11173_c0_g1	119.486	-0.156565	0.24857	-0.629864	0.528783	0.840705
PC11175_c0_g1	420.769	0.0833245	0.205864	0.404755	0.685658	0.902219
PC11176_c0_g1	413.066	0.151387	0.310569	0.487449	0.62594	0.879762
PC11177_c0_g1	125.387	-0.34385	0.258416	-1.33061	0.183319	0.661826
PC11178_c0_g1	632.747	-0.361136	0.318356	-1.13438	0.256636	0.720384
PC111788_c0_g1	10.4969	0.0220896	0.3515	0.0628438	0.949891
PC11179_c0_g1	15.1339	-0.403044	0.293974	-1.37102	0.170368
PC1118_c0_g1	1424.54	-0.552266	0.181465	-3.04338	0.0023394	0.105267
PC111822_c0_g1	6.35078	-0.839114	0.526903	-1.59254	0.111264
PC11183_c0_g2	28.3818	-0.199129	0.619075	-0.321656	0.747713	0.924151
PC111859_c0_g1	3.08781	0.782758	0.801946	0.976073	0.329028
PC11186_c0_g3	617.26	-0.13364	0.184814	-0.723104	0.469616	0.815546
PC111881_c0_g1	4.8645	2.18983	1.45654	1.50345	0.132724
PC11189_c0_g1	23.4707	0.685375	0.559377	1.22525	0.220482	0.69468
PC1119_c0_g1	231.198	-0.130639	0.131254	-0.995315	0.319583	0.749025
PC11196_c0_g1	3.64647	-1.87775	1.46856	-1.27864	0.201024
PC11197_c0_g1	57.4434	-0.0899064	0.182838	-0.491726	0.622913	0.878324
PC112_c0_g1	9641.33	-0.0658355	0.140641	-0.468109	0.639707	0.885813
PC1120_c0_g1	930.323	-0.103336	0.192004	-0.538196	0.590442	0.862767
PC11202_c0_g1	194.863	-0.705468	0.350368	-2.0135	0.0440617	0.418133
PC11206_c0_g1	179.327	-0.107662	0.159342	-0.675668	0.499252	0.828206
PC11207_c0_g1	56.0928	-0.00730191	0.347727	-0.020999	0.983246	0.994746
PC112078_c0_g1	3.03421	1.28365	0.719979	1.78289	0.0746037
PC11209_c0_g1	330.45	0.157095	0.205059	0.7661	0.443617	0.80616
PC11209_c1_g1	39.2932	0.168863	0.278017	0.607383	0.543597	0.846211
PC1121_c0_g1	297.607	0.0383838	0.146149	0.262634	0.792833	0.941018
PC11210_c0_g1	40.5934	0.582333	0.364879	1.59596	0.110498	0.583114
PC11210_c1_g1	7.9795	-0.0315976	0.33783	-0.0935312	0.925482
PC11212_c0_g5	358.989	0.287721	0.270284	1.06451	0.287096	0.736921
PC11213_c0_g1	11.2111	0.225613	0.51974	0.434089	0.664224
PC11214_c0_g1	228.106	-0.485096	0.397124	-1.22152	0.221888	0.695484
PC11215_c0_g3	5.7387	-0.774135	0.547602	-1.41368	0.157456
PC11217_c1_g1	7.47795	-0.237262	0.506935	-0.468032	0.639762
PC11217_c2_g1	8.293	1.532	0.682815	2.24365	0.0248551
PC11217_c2_g2	16.0917	0.0142634	0.359704	0.0396533	0.96837
PC11219_c0_g1	64.2003	-0.0787105	0.224608	-0.350434	0.726013	0.915492
PC1122_c0_g1	66.1031	-0.207252	0.2671	-0.775935	0.437787	0.8024
PC1122_c0_g2	1277.11	0.643847	0.681623	0.944579	0.344874	0.758867
PC112228_c0_g1	5.91302	0.635109	0.417653	1.52066	0.128345
PC11224_c0_g1	232.19	0.147602	0.112228	1.3152	0.188442	0.666769
PC11225_c0_g1	399.779	-0.230713	0.154149	-1.49669	0.134474	0.612723
PC11226_c0_g1	19.5733	0.0621354	0.390518	0.15911	0.873582	0.964984
PC11228_c0_g1	39.2118	0.237752	0.226899	1.04783	0.294717	0.740179
PC11229_c0_g1	28.6183	0.287975	0.377796	0.76225	0.445911	0.806875
PC1123_c0_g1	91569	0.412417	0.336582	1.22531	0.220459	0.69468
PC1123_c0_g2	14092.8	0.277998	0.352669	0.788269	0.430539	0.798294
PC1123_c0_g3	828.646	0.0146124	0.820094	0.0178179	0.985784	0.995561
PC1123_c0_g4	462.21	0.0971945	0.507418	0.191547	0.848097	0.957438
PC11230_c0_g1	10.3822	-0.989637	0.552481	-1.79126	0.0732518
PC11231_c0_g1	9.38938	-0.756553	0.557306	-1.35752	0.174617
PC112376_c0_g1	5.1916	0.216448	0.518312	0.417603	0.676237
PC11238_c0_g1	490.317	0.171498	0.275996	0.621378	0.534351	0.842663
PC11239_c0_g1	31.8179	-0.107041	0.227363	-0.470794	0.637788	0.884967
PC1124_c0_g2	122.575	0.0655087	0.222765	0.294071	0.768703	0.932312
PC1124_c1_g2	6.2162	0.163091	0.420508	0.387842	0.698133
PC1124_c2_g1	26.636	0.0800614	0.240899	0.332345	0.739629	0.922094
PC11242_c0_g1	24.6379	-0.383979	0.354625	-1.08278	0.278908	0.731185
PC1125_c0_g1	55.1212	0.114331	0.182884	0.625154	0.53187	0.841755
PC11250_c0_g1	21.3803	0.382602	0.372301	1.02767	0.304106	0.743526
PC11254_c0_g1	54.6461	-0.47928	0.463864	-1.03323	0.301494	0.743526
PC11254_c0_g3	6.8307	0.526363	0.608454	0.865083	0.386993
PC11255_c0_g1	14.3944	-1.06755	0.680523	-1.56872	0.116714
PC11255_c0_g2	1007.04	0.658389	0.701997	0.93788	0.348306	0.760689
PC11256_c0_g1	36.2792	-1.08726	0.365129	-2.97774	0.00290383	0.120614
PC11257_c0_g1	8.03848	-0.485049	0.506752	-0.957172	0.33848
PC11258_c0_g3	6.72664	0.641494	0.349634	1.83476	0.0665412
PC1126_c0_g1	600.554	-0.0239687	0.168769	-0.142021	0.887063	0.967468
PC11261_c0_g1	1205.72	-0.309906	0.16086	-1.92656	0.054034	0.453738
PC11263_c0_g1	93.6941	-0.525042	0.722251	-0.726953	0.467255	0.814133
PC11263_c1_g1	17.3457	-0.0343611	0.651873	-0.0527113	0.957962
PC11265_c0_g1	14124.2	0.288627	0.318436	0.906389	0.36473	0.768218
PC11266_c0_g1	81.7004	-0.243894	0.222954	-1.09392	0.27399	0.72864
PC11266_c0_g2	14.5774	-0.840918	0.322206	-2.60987	0.00905758
PC11267_c0_g1	5.65731	-1.24941	0.610046	-2.04806	0.0405545
PC11267_c1_g1	18.786	-0.256662	0.442803	-0.579631	0.562163	0.853976
PC11268_c0_g1	23.0468	0.188302	0.408329	0.461152	0.64469	0.887839
PC1127_c0_g1	807.283	0.00903452	0.113166	0.0798344	0.936369	0.981769
PC11270_c0_g1	39.4928	-0.343855	0.311679	-1.10324	0.269925	0.726626
PC11270_c0_g2	4333.86	0.0655077	0.13814	0.474212	0.635348	0.88381
PC11272_c0_g1	56.5295	0.165894	0.167871	0.98822	0.323045	0.751144
PC11272_c0_g3	11.7508	0.327339	0.430044	0.761175	0.446553
PC11273_c2_g1	6.50433	-0.326686	0.639638	-0.510737	0.609535
PC11276_c0_g1	160.357	0.194463	0.117334	1.65735	0.0974486	0.559133
PC11276_c1_g1	98.1177	0.611477	0.424071	1.44192	0.149325	0.628642
PC11277_c0_g1	31.8187	0.444623	0.26323	1.68911	0.091199	0.544813
PC11277_c1_g1	36.8541	-0.131636	0.315502	-0.417229	0.676511	0.900345
PC11277_c1_g2	27.0127	-0.378143	0.481241	-0.785768	0.432004	0.798845
PC11278_c0_g1	21.3013	-0.174051	0.629119	-0.276657	0.782043	0.93673
PC11278_c0_g2	276.634	-0.191198	0.172332	-1.10948	0.267225	0.726197
PC1128_c0_g1	4754.13	-0.701074	0.616227	-1.13769	0.255251	0.719102
PC11281_c0_g3	19.9556	-0.130392	0.383556	-0.339955	0.733891	0.919497
PC11282_c0_g2	28.9544	0.15247	0.259096	0.588468	0.556218	0.851336
PC11282_c1_g1	9.21289	0.562555	0.445753	1.26203	0.206937
PC11286_c0_g1	81.1797	0.288143	0.615168	0.468398	0.6395	0.885813
PC11287_c0_g1	87.9314	0.134882	0.212028	0.636153	0.524677	0.838269
PC11288_c0_g1	531.335	-0.102424	0.32682	-0.313396	0.75398	0.925925
PC11289_c0_g2	12.6715	0.259288	0.354141	0.732159	0.464072
PC1129_c0_g1	260.222	-0.0618854	0.139601	-0.443301	0.657548	0.892522
PC1129_c1_g1	549.218	0.30855	0.23562	1.30953	0.190357	0.668235
PC11290_c0_g1	3023.27	0.266436	0.222259	1.19877	0.230619	0.702732
PC4784_c0_g1	743.44	-1.41743	0.385852	-3.67351	0.000239243	0.0325425
PC11295_c0_g1	62.7619	0.346625	0.268391	1.29149	0.196534	0.674067
PC11296_c0_g1	2051.09	-0.286372	0.193718	-1.47829	0.13933	0.619121
PC11297_c0_g1	979.213	-0.210225	0.159042	-1.32182	0.186228	0.664345
PC11298_c0_g1	11.7361	0.921105	0.596421	1.54439	0.122494
PC11298_c1_g1	37.5575	0.122551	0.419585	0.292076	0.770229	0.932659
PC11299_c0_g1	294.746	0.0480814	0.174748	0.275146	0.783204	0.936764
PC113_c0_g1	177.591	-0.0844766	0.217206	-0.388923	0.697333	0.90597
PC113_c0_g2	438.37	0.0509463	0.123886	0.411236	0.680899	0.901005
PC113_c0_g4	25.031	0.111377	0.555368	0.200546	0.841054	0.955016
PC113_c0_g5	29.1626	-0.145946	0.295854	-0.493303	0.621799	0.878003
PC1130_c0_g1	644.941	0.284834	0.41206	0.691244	0.489413	0.824733
PC11300_c0_g1	9.6081	-0.0286195	0.40932	-0.0699195	0.944258
PC11302_c0_g1	12.1843	-0.706964	0.371287	-1.90409	0.0568982
PC11303_c1_g1	3.89539	-0.221404	0.540042	-0.409976	0.681824
PC11305_c0_g1	259.184	0.176164	0.225116	0.78255	0.433891	0.800032
PC11306_c0_g1	12.2903	-0.399456	0.340527	-1.17305	0.240775
PC11307_c0_g1	94.6063	-0.495733	0.217276	-2.28158	0.022514	0.325366
PC11308_c3_g2	3.40962	-0.329531	2.45663	-0.134139	0.893292
PC11309_c0_g2	688.259	-0.173348	0.124868	-1.38826	0.165059	0.64299
PC11309_c1_g1	33.7659	1.13213	0.74543	1.51876	0.128823	0.604244
PC1131_c0_g1	21.6643	-0.676835	0.282742	-2.39383	0.0166735	0.289704
PC1131_c0_g2	58.9288	0.102722	0.232987	0.440892	0.659291	0.892901
PC1131_c0_g4	132.182	-0.611615	0.21727	-2.815	0.00487779	0.160757
PC11312_c0_g1	18.619	-0.0696625	0.424487	-0.16411	0.869645	0.963611
PC11313_c0_g1	5.16066	-0.753122	0.503699	-1.49518	0.134867
PC11313_c1_g1	10.4666	-0.478025	0.484862	-0.985898	0.324183
PC11313_c3_g1	8.72051	-0.182024	0.441708	-0.412092	0.680272
PC11315_c0_g1	109.521	0.287303	0.274537	1.0465	0.295331	0.740617
PC11315_c0_g2	24.3191	-0.153255	0.289038	-0.530222	0.595958	0.865143
PC11315_c2_g1	51.8501	-0.413678	0.229286	-1.8042	0.0712001	0.502044
PC11317_c1_g1	3.9988	1.20997	0.516746	2.34153	0.019205
PC11317_c2_g1	11.0129	0.152491	0.384178	0.396927	0.691421
PC11317_c4_g1	4.72803	0.204455	0.584653	0.349704	0.726561
PC11318_c0_g2	85.7513	0.117221	0.343401	0.341353	0.732838	0.918767
PC11318_c0_g3	29.9709	0.155599	0.335117	0.464312	0.642424	0.887009
PC11319_c0_g1	338.73	0.0350824	0.132457	0.264859	0.791118	0.940171
PC1132_c0_g1	19.572	0.779119	0.507103	1.53641	0.124438	0.598263
PC11320_c0_g1	1533.4	0.334381	0.34255	0.976151	0.32899	0.753021
PC11321_c0_g1	90.456	0.257141	0.24978	1.02947	0.303259	0.743526
PC11323_c0_g1	15.3926	-0.0617056	0.378616	-0.162977	0.870537
PC11325_c0_g1	3.17175	-1.63887	1.05863	-1.5481	0.121597
PC11326_c0_g1	95.7845	0.314149	0.215737	1.45616	0.145347	0.624986
PC11327_c0_g1	16.4146	-0.0479816	0.431404	-0.111222	0.91144
PC11328_c0_g1	260.129	0.308349	0.416788	0.739823	0.459408	0.813141
PC11329_c0_g2	27.4556	0.643157	0.449054	1.43225	0.152073	0.632013
PC1133_c0_g1	1398.28	-0.374746	0.317699	-1.17956	0.238173	0.709939
PC11330_c0_g1	57.9267	-0.118946	0.190287	-0.625088	0.531914	0.841755
PC11330_c1_g1	40.0744	-0.438107	0.276075	-1.58691	0.112532	0.585301
PC11331_c1_g1	24.5855	-0.542425	0.308732	-1.75695	0.0789272	0.518683
PC11331_c1_g4	24.2709	0.405375	0.252411	1.60601	0.108271	0.580089
PC11332_c0_g1	14.9158	-0.131452	0.32807	-0.400683	0.688654
PC11333_c0_g1	16.4767	-2.27099	0.763231	-2.9755	0.00292515
PC11334_c2_g1	5.79191	-1.08567	0.883047	-1.22946	0.2189
PC11334_c3_g1	9.032	-0.733953	0.363483	-2.01922	0.0434643
PC11334_c3_g2	7.58961	0.382675	0.408095	0.937711	0.348393
PC11335_c0_g1	18.2897	-0.30524	0.241826	-1.26223	0.206867	0.683681
PC11337_c0_g1	21.9546	-0.537189	0.284211	-1.89011	0.0587433	0.470237
PC11337_c0_g2	221.017	-0.529967	0.878273	-0.60342	0.54623	0.84755
PC11338_c0_g1	56.4371	-0.166093	0.403038	-0.412102	0.680265	0.900811
PC11339_c0_g1	14.7769	-0.222821	0.349915	-0.636787	0.524264
PC1134_c0_g1	1218.08	0.12415	0.253659	0.489435	0.624534	0.878895
PC11341_c0_g1	7.897	0.741522	0.689916	1.0748	0.282464
PC11341_c1_g1	59.7455	0.030242	0.204707	0.147733	0.882553	0.966829
PC11342_c0_g1	166.071	-0.187519	0.109989	-1.7049	0.0882137	0.539718
PC11342_c1_g3	6.8355	-0.21523	0.498213	-0.432004	0.665738
PC11342_c5_g1	4.7011	0.0493379	0.473755	0.104142	0.917056
PC11343_c0_g1	27.3745	-0.481227	0.244229	-1.9704	0.0487931	0.436553
PC11344_c0_g1	3834.23	0.105439	0.152079	0.693316	0.488111	0.824344
PC11345_c0_g1	377.717	0.176072	0.11972	1.4707	0.141371	0.621416
PC11346_c0_g1	43.5729	-0.169307	0.296009	-0.571967	0.567344	0.855019
PC11347_c0_g1	27.2202	-0.308739	0.318534	-0.96925	0.332421	0.753566
PC11347_c1_g1	41.5979	-0.329282	0.504486	-0.652708	0.513945	0.833722
PC11348_c0_g1	23.5268	-0.42266	0.256647	-1.64685	0.0995883	0.562283
PC11349_c0_g1	15.4949	0.751371	0.50504	1.48775	0.136818
PC1135_c0_g1	159.819	0.0722365	0.177237	0.40757	0.683589	0.90181
PC1135_c0_g2	18.9724	0.028882	0.294965	0.0979167	0.921998	0.978198
PC1135_c1_g1	141.238	-0.24342	0.180023	-1.35216	0.176325	0.653438
PC1135_c2_g2	17.1347	0.288036	0.267842	1.07539	0.282198
PC11350_c0_g1	4.31681	0.920844	0.661526	1.392	0.163923
PC11350_c0_g2	6.44173	-4.15597	2.0303	-2.04698	0.0406603
PC11351_c0_g1	46.9551	-0.270306	0.243153	-1.11167	0.266281	0.725513
PC11351_c0_g2	170.715	-0.108648	0.147394	-0.737129	0.461044	0.813141
PC11352_c2_g1	11.5316	0.62751	0.524096	1.19732	0.231182
PC11353_c0_g1	34.9619	0.249617	1.04575	0.238697	0.81134	0.947019
PC11354_c0_g1	7563.05	0.197652	0.160306	1.23296	0.217589	0.69236
PC11355_c0_g1	21.731	0.326045	0.482579	0.67563	0.499276	0.828206
PC11355_c0_g2	37.4731	0.376526	0.216318	1.74061	0.0817513	0.524815
PC11355_c0_g3	21.4288	-0.363138	0.332368	-1.09258	0.274579	0.72864
PC11355_c0_g4	72.1167	-0.0337108	0.166537	-0.202423	0.839586	0.954944
PC11355_c0_g5	5.71759	0.403868	0.638515	0.632511	0.527053
PC11357_c0_g1	14.1499	1.35319	0.465536	2.90674	0.00365217
PC11357_c1_g1	26.368	-0.281603	0.370064	-0.760957	0.446683	0.807161
PC11358_c0_g1	30.6531	-0.571055	0.227691	-2.50802	0.0121409	0.252436
PC11359_c0_g1	4.80892	-0.063322	0.617283	-0.102582	0.918295
PC1136_c0_g2	1075.44	0.162247	0.255387	0.6353	0.525233	0.838542
PC1136_c1_g1	143.357	0.125607	0.169672	0.740294	0.459121	0.813141
PC1136_c3_g1	14977.8	-0.528217	0.203324	-2.59791	0.00937932	0.223138
PC11360_c0_g1	245.768	0.410957	0.22409	1.8339	0.0666693	0.489701
PC11360_c1_g1	185.99	0.0228067	0.169772	0.134337	0.893136	0.96935
PC11360_c4_g1	16.2171	0.0239705	0.370087	0.0647699	0.948357
PC11361_c0_g1	18.0257	1.02883	0.453387	2.2692	0.0232562
PC11362_c0_g1	474.066	0.0164528	0.191934	0.0857214	0.931688	0.980322
PC11363_c0_g1	46.8493	0.36016	0.408734	0.88116	0.378231	0.771333
PC11363_c1_g1	6.14685	0.136313	0.442468	0.308075	0.758025
PC11364_c0_g1	38.2888	0.243341	0.265571	0.916292	0.359514	0.766743
PC11364_c1_g1	10.6017	0.590295	0.576325	1.02424	0.305723
PC11366_c0_g1	3269.27	-0.468633	0.521134	-0.899257	0.368516	0.770218
PC11367_c0_g1	189.621	0.0344411	0.106172	0.32439	0.745643	0.92361
PC11369_c0_g1	39.8474	0.631753	0.311051	2.03103	0.0422519	0.414486
PC11369_c1_g1	6.09733	0.553316	0.482511	1.14674	0.251488
PC1137_c0_g1	216.027	0.077109	0.131391	0.586866	0.557294	0.851811
PC11371_c0_g1	25.46	-0.257986	0.280418	-0.920005	0.35757	0.766693
PC11371_c1_g4	8.23121	0.486258	0.397881	1.22212	0.221663
PC11374_c1_g4	306.303	-0.0271032	0.135989	-0.199304	0.842025	0.955047
PC11375_c0_g1	8.49335	-0.623469	0.522035	-1.19431	0.232358
PC11375_c1_g4	82.0016	-0.567497	0.466816	-1.21567	0.224109	0.698299
PC11377_c2_g1	26.0624	-0.0475185	0.352413	-0.134837	0.89274	0.969249
PC11379_c0_g1	360.396	-0.0450753	0.12283	-0.366974	0.713639	0.911212
PC11379_c1_g1	38.5901	-0.453223	0.313233	-1.44692	0.147919	0.627241
PC1138_c0_g1	232.787	0.0459457	0.105848	0.434074	0.664235	0.895188
PC11380_c0_g1	116.125	-0.0323875	0.436933	-0.0741245	0.940911	0.983234
PC11384_c0_g1	47.2308	-0.590267	0.594468	-0.992933	0.320743	0.749808
PC11384_c1_g1	551.536	-0.0429284	0.125129	-0.343073	0.731543	0.917855
PC11387_c0_g1	49.9333	0.238804	0.422645	0.565022	0.572059	0.856886
PC11388_c1_g2	15.717	-0.52387	0.32974	-1.58874	0.112119
PC11389_c0_g1	9.16672	-0.327551	0.496939	-0.659137	0.509808
PC11389_c0_g2	32.4046	0.435484	0.307339	1.41695	0.156498	0.635474
PC1139_c0_g1	103.303	0.0867678	0.155879	0.556634	0.577777	0.858391
PC1139_c1_g1	35.3169	-0.56444	0.697162	-0.809626	0.418155	0.791437
PC1139_c1_g2	7.59975	-0.304827	0.435429	-0.70006	0.48389
PC1139_c2_g1	2.82492	-0.880157	0.830918	-1.05926	0.289482
PC1139_c3_g1	4.77251	-0.462682	0.553688	-0.835637	0.403359
PC11390_c0_g1	1877.11	0.460365	0.384906	1.19604	0.231679	0.704107
PC11392_c0_g2	47.2244	-0.592787	0.938319	-0.631754	0.527547	0.840154
PC11395_c0_g1	30.1247	0.104165	0.326656	0.318883	0.749815	0.924313
PC11396_c0_g1	8.27203	0.286279	0.354025	0.808641	0.418722
PC11397_c0_g1	19.99	0.263013	0.258833	1.01615	0.309558	0.74485
PC11398_c0_g1	910.338	0.159561	0.140495	1.13571	0.256079	0.720133
PC114_c0_g1	111.726	0.792078	0.483235	1.63911	0.10119	0.565131
PC1140_c0_g1	834.061	-0.254485	0.129747	-1.9614	0.0498323	0.440254
PC1140_c1_g1	58.7074	0.208136	0.340919	0.610515	0.541521	0.845352
PC1140_c11_g1	581.848	0.633808	0.746055	0.849547	0.395577	0.781266
PC1140_c12_g1	187.725	-0.309876	0.127495	-2.43049	0.0150784	0.277565
PC1140_c15_g1	3.70029	-0.141811	0.689356	-0.205716	0.837013
PC1140_c16_g1	89.1892	-0.369706	0.252451	-1.46447	0.143066	0.623083
PC1140_c17_g1	8.81407	-0.304461	0.384512	-0.791813	0.42847
PC1140_c19_g2	73.8324	-0.535993	0.258351	-2.07467	0.0380174	0.397102
PC1140_c2_g1	864.653	-0.198185	0.130351	-1.5204	0.128411	0.603649
PC1140_c2_g2	575.71	-0.125915	0.158212	-0.795862	0.426112	0.796231
PC1140_c2_g3	246.648	-0.132729	0.194876	-0.681096	0.49581	0.826946
PC1140_c35_g1	10.2238	0.23588	0.66028	0.357243	0.72091
PC1140_c4_g1	662.651	0.284513	0.451036	0.630798	0.528172	0.840392
PC1140_c6_g1	211.944	-0.0788528	0.133956	-0.588649	0.556097	0.851336
PC1140_c7_g1	81.9955	-0.264494	0.238359	-1.10965	0.267152	0.726197
PC1140_c8_g1	74.2171	-0.118847	0.209704	-0.56674	0.570891	0.85638
PC1140_c9_g1	685.177	-0.21734	0.183885	-1.18193	0.237232	0.708557
PC11400_c0_g1	5.27613	-0.0830575	0.654635	-0.126876	0.899038
PC11401_c0_g1	19.1759	-0.80061	0.384367	-2.08293	0.0372575	0.394704
PC11401_c0_g2	35.9892	-0.0858466	0.215589	-0.398196	0.690486	0.903236
PC11401_c2_g1	5.21382	0.957537	1.00461	0.953147	0.340515
PC11403_c0_g1	84.7203	-0.302747	0.388916	-0.778436	0.436312	0.801587
PC11404_c0_g1	7.09765	-1.02643	0.637562	-1.60993	0.107414
PC11405_c0_g1	19.8465	0.329903	0.34283	0.962292	0.335903	0.753621
PC11405_c0_g2	39.4682	0.0349322	0.327703	0.106597	0.915108	0.975783
PC11406_c0_g1	8.6476	0.248729	0.433806	0.573365	0.566397
PC11407_c0_g1	165.334	0.276445	0.206423	1.33921	0.180501	0.657965
PC11407_c1_g1	23.8131	-0.715317	0.515063	-1.3888	0.164895	0.64299
PC11408_c0_g1	54.1541	0.900327	0.566048	1.59055	0.111711	0.584235
PC11409_c0_g3	4.96943	0.191944	0.826299	0.232294	0.81631
PC1141_c0_g1	47.1089	0.119548	0.208214	0.574161	0.565859	0.854827
PC11414_c0_g1	56.0173	0.288488	0.231905	1.24399	0.213504	0.690082
PC11415_c0_g2	5.08662	0.441201	0.675347	0.653295	0.513566
PC11415_c0_g3	7.36644	0.456985	0.409064	1.11715	0.263932
PC11416_c0_g1	416.53	0.201467	0.11851	1.7	0.0891314	0.542015
PC11417_c0_g1	3.74948	0.126411	0.547657	0.230821	0.817454
PC11419_c0_g1	88.9621	-0.322281	0.273588	-1.17798	0.238806	0.709993
PC11419_c1_g1	5.84775	-0.125831	0.554985	-0.226728	0.820635
PC1142_c0_g1	76.4512	0.0932435	0.159956	0.58293	0.55994	0.853404
PC11421_c0_g1	19.1982	-0.536903	0.324526	-1.65442	0.0980421	0.560838
PC11422_c0_g1	67.0642	-0.0357846	0.182981	-0.195565	0.844951	0.95613
PC11425_c0_g1	29.5882	0.355406	0.249524	1.42434	0.154349	0.633294
PC11427_c0_g1	107.557	0.210687	0.228677	0.921334	0.356876	0.766693
PC11427_c1_g1	49.9843	-0.421418	0.549371	-0.767091	0.443027	0.805705
PC11428_c0_g1	6.87284	-0.20023	0.386395	-0.5182	0.604319
PC11429_c0_g1	54.6868	-0.276323	0.256319	-1.07804	0.281014	0.733362
PC1143_c0_g1	143.86	-0.150885	0.170445	-0.885238	0.376028	0.771333
PC11430_c0_g1	851.511	0.236346	0.173644	1.3611	0.173483	0.651621
PC18748_c0_g1	50.0001	-1.39692	0.348786	-4.00508	6.19954e-05	0.0146407
PC11435_c1_g1	4.30557	-0.85298	0.497452	-1.7147	0.0864005
PC11436_c0_g1	84.0069	0.401611	0.413712	0.970752	0.331672	0.753566
PC11436_c1_g1	932.129	-0.0774098	0.119352	-0.648585	0.516607	0.834779
PC11437_c0_g1	7.17065	-0.0678118	0.399625	-0.169689	0.865255
PC114377_c0_g1	7.05896	0.098241	1.13663	0.0864315	0.931123
PC11438_c0_g1	336.82	0.374498	0.152563	2.45471	0.0140998	0.26871
PC11439_c0_g1	28.2512	-0.548919	0.352022	-1.55933	0.118918	0.59223
PC1144_c0_g1	87.8623	0.188165	0.255479	0.736518	0.461415	0.813141
PC11443_c0_g4	12.1728	-0.131974	0.401805	-0.328454	0.742569
PC11444_c0_g1	6.84637	-0.519655	0.724132	-0.717626	0.472988
PC11447_c0_g1	1047.92	-0.10548	0.104149	-1.01277	0.311168	0.745173
PC11448_c1_g1	18.4316	0.0890843	0.348525	0.255604	0.798257	0.942703
PC11448_c1_g2	7.71198	-0.13026	0.429919	-0.302986	0.7619
PC1145_c0_g1	2238.19	0.25954	0.155349	1.6707	0.0947816	0.554141
PC1145_c1_g1	27.4374	-0.231068	0.26145	-0.883794	0.376808	0.771333
PC11450_c0_g1	18.1177	-0.454187	0.329686	-1.37763	0.168316
PC11450_c0_g2	5.83078	0.406213	0.51782	0.784467	0.432766
PC11452_c0_g1	27.4236	0.140595	0.430301	0.326735	0.743868	0.923198
PC11453_c0_g1	16.4561	-0.638607	0.274247	-2.32858	0.0198812
PC11454_c0_g1	13.9609	0.182478	0.361299	0.50506	0.613517
PC11454_c0_g2	13.2039	-0.155841	0.274196	-0.568356	0.569794
PC11454_c0_g3	15.3417	-0.618529	0.623133	-0.992612	0.320899
PC11454_c1_g1	16.1648	-0.115382	0.296005	-0.389798	0.696686
PC11456_c0_g1	41.0067	0.424356	0.293788	1.44443	0.148619	0.627992
PC39208_c0_g1	21.0554	-1.36091	0.324821	-4.18972	2.79297e-05	0.00829465
PC1146_c1_g1	72.2063	0.101655	0.138114	0.73602	0.461718	0.813141
PC1146_c12_g1	14.5028	0.400932	0.299948	1.33667	0.181329
PC1146_c2_g1	150.857	0.00675566	0.162484	0.0415775	0.966836	0.990573
PC1146_c3_g1	28.7334	0.380108	0.220364	1.72491	0.0845437	0.530639
PC11460_c0_g1	33.1251	0.0615728	0.40059	0.153705	0.877842	0.965874
PC11463_c0_g1	1165.53	0.371924	0.246347	1.50976	0.131106	0.608055
PC11463_c2_g2	3.79626	0.322496	0.499184	0.646046	0.51825
PC11464_c0_g1	31.8389	0.33112	0.20676	1.60147	0.109272	0.581387
PC11464_c0_g2	71.1523	-0.105006	0.175314	-0.598959	0.5492	0.847867
PC11464_c1_g1	123.875	-0.380658	0.238395	-1.59676	0.11032	0.583114
PC11465_c0_g1	94.8503	0.131358	0.127117	1.03337	0.301432	0.743526
PC11469_c0_g1	7337.55	-0.191967	0.101898	-1.88392	0.0595764	0.471265
PC11469_c3_g1	5.13568	0.234972	0.554536	0.423728	0.671764
PC11469_c6_g1	10.1132	0.066851	0.514248	0.129997	0.896568
PC1147_c15_g1	20.5615	0.294465	0.296102	0.99447	0.319994	0.749128
PC1147_c19_g2	8.54685	1.16373	0.520411	2.23617	0.0253407
PC1147_c2_g1	8.72503	-0.456507	0.509802	-0.895458	0.370542
PC1147_c4_g1	446.138	0.19242	0.247527	0.77737	0.43694	0.801755
PC1147_c49_g1	1074.26	-0.2241	0.246996	-0.907302	0.364247	0.768024
PC1147_c9_g1	16.2894	-0.186706	0.243435	-0.766968	0.443101
PC1147_c9_g2	72.8479	-0.168915	0.172543	-0.978978	0.327591	0.752669
PC11470_c0_g1	258.337	-0.229161	0.163239	-1.40384	0.160367	0.640976
PC11473_c1_g1	12.1181	-0.0809675	0.344102	-0.235301	0.813975
PC11474_c0_g1	11.7558	-0.131634	0.386768	-0.340344	0.733597
PC11475_c0_g1	115.378	0.871251	0.465147	1.87307	0.0610593	0.476155
PC11476_c0_g1	1203.97	0.315295	0.318279	0.990625	0.321869	0.750782
PC11477_c0_g1	1066.88	0.0756845	0.128824	0.587503	0.556866	0.851496
PC11478_c0_g1	32.35	-0.181777	0.56527	-0.321575	0.747774	0.924151
PC11478_c0_g2	22.5422	0.096506	0.21342	0.452188	0.651133	0.891215
PC11478_c1_g1	2612.96	0.076362	0.108286	0.705188	0.480693	0.820205
PC11479_c0_g1	105.245	0.00273567	0.195614	0.0139851	0.988842	0.996625
PC1148_c0_g1	11.4079	-0.225812	0.295927	-0.763067	0.445423
PC1148_c0_g2	98.9674	-0.297091	0.256442	-1.15851	0.246654	0.713032
PC1148_c1_g1	208.505	0.173653	0.142473	1.21885	0.222901	0.696493
PC11481_c0_g1	685.692	0.24486	0.153675	1.59336	0.111079	0.583114
PC11482_c5_g1	7.12881	-0.399407	0.42266	-0.944984	0.344667
PC11482_c6_g1	11.0812	-0.365628	0.377652	-0.968163	0.332963
PC11483_c0_g1	61.7023	-0.0227687	0.321532	-0.0708132	0.943546	0.984025
PC11484_c1_g1	35.3942	0.145801	1.8477	0.0789097	0.937104	0.982107
PC11485_c0_g1	5.87634	-0.664296	0.483399	-1.37422	0.169374
PC11487_c0_g1	5.94422	0.301679	0.432487	0.697545	0.485462
PC11488_c0_g1	240.57	-0.105992	0.200123	-0.529636	0.596364	0.865202
PC1149_c0_g1	147.331	0.418814	0.305734	1.36987	0.170729	0.648526
PC11493_c0_g1	170.714	0.852492	0.537274	1.5867	0.112581	0.585301
PC11494_c0_g1	15.3476	-0.268704	0.407347	-0.659644	0.509482
PC11494_c2_g2	49.3213	-0.237451	0.42065	-0.564487	0.572423	0.857071
PC11495_c0_g1	47.1697	-0.688641	0.375586	-1.83351	0.066727	0.489909
PC11497_c0_g1	10.7146	0.0268756	0.584458	0.0459839	0.963323
PC11497_c0_g2	3.37742	0.35452	0.996444	0.355785	0.722002
PC11498_c1_g1	17.5693	0.149007	0.430704	0.345961	0.729372
PC11498_c4_g1	21.5119	1.12477	0.573642	1.96075	0.0499081	0.440254
PC11499_c0_g1	1311.77	-0.108717	0.285234	-0.381151	0.703091	0.908331
PC115_c0_g1	3123.39	-0.146204	0.142631	-1.02505	0.30534	0.744303
PC1150_c0_g1	1825.38	0.13476	0.312893	0.430691	0.666693	0.89602
PC11500_c0_g1	17.1525	0.177064	0.244934	0.722906	0.469738
PC11501_c0_g3	25.6117	-0.164297	0.229442	-0.716073	0.473946	0.816849
PC11503_c1_g2	20.1797	-1.02037	0.551818	-1.84911	0.0644415	0.484099
PC11504_c0_g1	48.5867	-1.88335	0.904751	-2.08163	0.0373765	0.395149
PC11505_c0_g1	399.076	-0.368076	0.229051	-1.60696	0.108063	0.580089
PC11506_c0_g1	39.1427	-0.22747	0.711047	-0.319908	0.749038	0.92423
PC11506_c0_g2	86.6876	0.207233	0.36849	0.562385	0.573854	0.857715
PC11506_c1_g1	10.0752	0.539073	0.57099	0.944101	0.345118
PC11506_c1_g4	48.6116	0.302648	0.48156	0.628474	0.529694	0.840994
PC11507_c0_g1	5.08313	-0.247492	0.613409	-0.40347	0.686603
PC11508_c0_g1	15.0453	0.189847	0.413617	0.458991	0.646241
PC11508_c1_g1	4.93454	-0.0847374	0.533969	-0.158693	0.873911
PC11508_c2_g1	8.37923	0.298246	0.359772	0.828987	0.407112
PC11508_c3_g1	9.091	-0.0623558	1.07754	-0.0578685	0.953853
PC11509_c0_g1	2498.59	0.192352	0.101734	1.89074	0.0586592	0.470237
PC7956_c0_g1	56.6199	-1.32774	0.362495	-3.66278	0.000249494	0.0329313
PC1151_c0_g2	95.6759	-0.126536	0.255775	-0.494718	0.620799	0.877521
PC1151_c0_g4	81.9686	0.100668	0.180456	0.55785	0.576947	0.858391
PC1151_c0_g5	7.06954	1.1384	0.684229	1.66377	0.0961583
PC1151_c1_g1	62.0027	-0.0739183	0.172465	-0.428598	0.668215	0.896668
PC11510_c0_g1	201.368	-0.202033	0.144627	-1.39693	0.162435	0.642489
PC11511_c0_g1	32.4342	-0.114643	0.225784	-0.507755	0.611625	0.872471
PC11513_c0_g1	6.57854	-0.207962	0.480996	-0.432357	0.665482
PC11513_c2_g2	5.28201	0.0901539	0.526821	0.171128	0.864123
PC11515_c0_g1	3.58612	-1.13995	2.96846	-0.384019	0.700965
PC11515_c0_g2	27.421	0.12416	0.270875	0.458367	0.646689	0.889079
PC11515_c0_g3	9.80567	-0.336895	0.587687	-0.573256	0.566472
PC11517_c0_g1	22.5398	0.533299	0.275226	1.93767	0.0526632	0.449907
PC11519_c0_g1	58.7132	-0.141157	0.195505	-0.722014	0.470286	0.815737
PC1152_c0_g1	13731.2	-0.182443	0.211654	-0.861989	0.388694	0.777137
PC1152_c1_g1	158.531	0.250636	0.133217	1.88141	0.0599159	0.471781
PC11520_c0_g1	19.4007	0.597553	0.553048	1.08047	0.279932	0.732519
PC11523_c1_g2	22.1725	-0.344782	0.33742	-1.02182	0.306867	0.744759
PC11523_c2_g1	5.33157	-0.554784	0.635773	-0.872614	0.382874
PC11524_c1_g1	127.686	-0.308257	0.14234	-2.16564	0.030339	0.363
PC11524_c2_g1	9.16484	0.232181	0.450214	0.515712	0.606056
PC11525_c0_g1	16230.1	-0.151647	0.112977	-1.34229	0.179502	0.657328
PC11526_c0_g2	5.26062	0.274191	0.756846	0.362281	0.717142
PC11527_c0_g1	258.546	0.213262	0.259535	0.821707	0.411244	0.788692
PC11529_c0_g1	8.0948	0.401155	0.414702	0.967332	0.333378
PC1153_c0_g2	344.631	-0.0503266	0.108279	-0.464786	0.642085	0.887009
PC1153_c0_g3	115.994	0.412798	0.50304	0.820607	0.41187	0.789041
PC1153_c0_g4	25.9959	-0.696305	0.319011	-2.1827	0.0290578	0.358514
PC1153_c1_g1	195.385	-0.226811	0.137947	-1.64419	0.100136	0.563876
PC1153_c2_g1	111.974	0.174905	0.173193	1.00988	0.312551	0.746011
PC1153_c3_g1	20.4473	-0.828884	0.271453	-3.0535	0.00226186	0.104254
PC1153_c4_g1	19.7597	0.0412606	0.278115	0.148358	0.88206	0.966829
PC1153_c6_g1	86.3329	0.0825633	0.450942	0.183091	0.854727	0.958602
PC11530_c0_g1	448.213	-0.103359	0.107262	-0.963616	0.335239	0.753621
PC11530_c0_g2	22.742	0.113026	0.468839	0.241076	0.809496	0.947019
PC11531_c0_g1	213.037	-0.0442463	0.150129	-0.294722	0.768206	0.931963
PC11537_c0_g1	97.6254	0.0787935	0.181161	0.434937	0.663608	0.894925
PC1154_c0_g1	3338.87	0.011769	0.31703	0.0371227	0.970387	0.991816
PC11541_c0_g1	43.6213	-0.52511	0.309335	-1.69754	0.089594	0.542324
PC11541_c0_g2	29.7441	-0.374162	0.426719	-0.876835	0.380576	0.773076
PC11544_c0_g1	265.583	-0.181664	0.172253	-1.05464	0.291591	0.738858
PC11545_c0_g1	401.177	-0.139115	0.138366	-1.00541	0.3147	0.746605
PC11546_c0_g1	1060.74	-0.0651567	0.139733	-0.466293	0.641006	0.886457
PC11548_c0_g1	8.15068	-0.348128	0.639797	-0.544123	0.586357
PC1155_c0_g1	1414.56	-0.0566904	0.0985254	-0.575389	0.565028	0.854608
PC11550_c0_g1	243.585	0.253624	0.243993	1.03947	0.298584	0.742359
PC11551_c0_g1	38.1558	0.0980053	0.330311	0.296706	0.766691	0.931456
PC11551_c0_g3	127.663	0.4705	0.534418	0.880396	0.378645	0.771333
PC11552_c0_g1	39.3422	0.0350269	0.200335	0.174841	0.861204	0.960605
PC11555_c0_g1	16.9559	-0.244062	0.273056	-0.893818	0.37142
PC1156_c0_g1	648.292	0.20576	0.339878	0.605394	0.544917	0.847187
PC11567_c0_g1	351.916	0.0264071	0.131261	0.201179	0.840558	0.955016
PC1157_c0_g1	906.977	-0.0593511	0.112472	-0.527696	0.597711	0.86541
PC18118_c0_g2	10519.7	-1.27672	0.320006	-3.98967	6.61654e-05	0.0150521
PC11576_c0_g1	10.8932	0.283958	0.351115	0.808732	0.418669
PC11576_c0_g2	40.3358	-0.429959	0.240225	-1.78982	0.073483	0.507714
PC11576_c0_g3	107.963	-0.360472	0.192796	-1.86971	0.0615242	0.476363
PC11576_c1_g1	10.2956	-0.335807	0.410146	-0.81875	0.412929
PC11576_c4_g1	19.1077	1.41866	0.744645	1.90515	0.0567603	0.462466
PC11578_c0_g1	52.3551	-0.148626	0.189192	-0.785582	0.432113	0.798845
PC11578_c0_g2	4.42711	-0.46531	0.510634	-0.911239	0.36217
PC1158_c0_g1	788.644	-0.143716	0.205245	-0.700216	0.483793	0.82183
PC1158_c0_g2	2234.82	-0.234937	0.170897	-1.37473	0.169215	0.647703
PC11580_c0_g1	28.4048	-0.148477	0.308624	-0.481094	0.630449	0.881511
PC11580_c0_g2	5.26981	0.553886	0.402839	1.37496	0.169145
PC11581_c0_g2	38.379	0.173647	0.201141	0.863308	0.387968	0.777137
PC11583_c0_g1	3037.11	-0.0729032	0.177604	-0.410481	0.681453	0.901073
PC11585_c0_g1	10.3155	0.757476	0.384689	1.96906	0.0489464
PC11585_c1_g1	6.90527	0.989028	0.382512	2.58562	0.00972054
PC11589_c0_g1	434.644	-0.0841864	0.0973351	-0.864913	0.387086	0.776308
PC1159_c0_g1	450.545	0.0649723	0.161574	0.402122	0.687595	0.903025
PC11590_c0_g1	289.843	-0.0904199	0.191801	-0.471425	0.637337	0.884823
PC11591_c0_g2	10.7921	-0.0645837	0.30888	-0.20909	0.834378
PC11592_c0_g1	24.3563	-0.28315	0.468629	-0.604209	0.545705	0.847317
PC11593_c0_g1	12.1537	0.425724	0.394745	1.07848	0.28082
PC11594_c0_g1	7.23954	-0.149474	0.413546	-0.361443	0.717768
PC11594_c1_g1	28.0813	1.22184	0.907388	1.34655	0.178125	0.654877
PC11595_c0_g1	4.47415	0.505726	0.616151	0.820783	0.41177
PC11596_c1_g1	142.362	-0.27686	0.24529	-1.1287	0.259022	0.722416
PC11597_c1_g1	8.12891	-0.41871	0.635127	-0.659254	0.509733
PC11597_c1_g2	6.14821	0.886736	0.59153	1.49905	0.133859
PC11598_c1_g1	6.56377	0.241914	0.443992	0.544861	0.585849
PC11599_c0_g1	48.9523	-0.0487645	0.228564	-0.213352	0.831052	0.951827
PC116_c0_g1	182.8	0.522187	0.221393	2.35865	0.0183418	0.300904
PC116_c1_g1	1023.82	0.146565	0.18055	0.811771	0.416923	0.791093
PC116_c3_g1	144.871	-0.314432	0.222604	-1.41252	0.157798	0.637165
PC116_c4_g1	146.236	0.0353795	0.107234	0.329928	0.741454	0.922677
PC116_c4_g2	8.08723	0.383144	0.63419	0.604147	0.545746
PC1160_c0_g1	513.409	0.357989	0.470691	0.76056	0.44692	0.807381
PC11600_c0_g2	461.612	0.156908	0.178863	0.87725	0.380351	0.773027
PC11600_c0_g3	5.35938	0.024773	0.471997	0.0524856	0.958142
PC11600_c1_g1	4.0606	-1.26115	0.562525	-2.24194	0.024965
PC11600_c1_g3	10.344	0.796219	0.735473	1.0826	0.278988
PC11601_c0_g1	8.18071	-0.801746	0.808303	-0.991889	0.321252
PC11602_c0_g1	4.59288	0.0702166	0.487575	0.144012	0.885491
PC11603_c0_g2	1145.01	-0.0395078	0.166783	-0.236882	0.812749	0.947302
PC11603_c1_g1	16.3789	0.153528	0.278481	0.551304	0.581425
PC11604_c0_g1	740.442	0.224441	0.0918693	2.44305	0.0145638	0.271457
PC116045_c0_g1	5592.51	0.142737	0.135045	1.05695	0.290533	0.738114
PC116049_c0_g1	25.3475	-0.419225	0.239998	-1.74679	0.0806742	0.52206
PC116059_c0_g1	9.88654	-0.712584	0.965903	-0.737739	0.460673
PC116068_c0_g1	40.2289	-0.288618	0.24273	-1.18905	0.23442	0.706608
PC11607_c0_g1	12.7044	-0.409513	0.674211	-0.607396	0.543588
PC116070_c0_g1	4.67381	0.138484	0.601833	0.230103	0.818012
PC116073_c0_g1	11.1738	2.03509	0.834264	2.43938	0.0147125
PC116076_c0_g1	25.8353	-0.0105658	0.396227	-0.0266659	0.978726	0.993067
PC116088_c0_g1	6.3441	0.0938462	0.534985	0.175418	0.860751
PC11609_c0_g1	8.48241	-1.02413	0.469315	-2.18218	0.0290966
PC11609_c1_g1	12.635	-0.581879	0.281308	-2.06848	0.0385948
PC1161_c0_g1	704.434	0.0950616	0.115521	0.822898	0.410566	0.788563
PC6185_c0_g1	34.0453	-1.15361	0.2958	-3.89998	9.61999e-05	0.0184321
PC116103_c0_g1	7.66065	0.2043	0.367805	0.555458	0.578581
PC11611_c0_g1	718.725	0.127982	0.158222	0.808875	0.418587	0.791437
PC116111_c0_g1	2.72602	0.429839	1.62626	0.264311	0.79154
PC11612_c1_g1	28.4033	-0.230799	0.324489	-0.711268	0.476918	0.818552
PC11613_c2_g1	5.04255	-0.30424	0.399136	-0.762246	0.445913
PC11614_c0_g1	17.9757	-1.43278	0.71975	-1.99066	0.0465179
PC116140_c0_g1	8.90611	-0.480756	0.996911	-0.482245	0.629632
PC11616_c0_g1	61.0165	-0.753704	0.280284	-2.68907	0.00716505	0.198252
PC116175_c0_g1	931.65	0.692296	0.905378	0.764649	0.444481	0.80662
PC11619_c0_g1	24.9543	0.208203	0.347742	0.598727	0.549355	0.847895
PC1162_c0_g1	1269.06	0.00306869	0.121169	0.0253257	0.979795	0.993361
PC116223_c0_g1	3657.61	-0.373155	0.131969	-2.82758	0.00469007	0.157684
PC116231_c0_g1	245.599	-0.485432	0.262769	-1.84737	0.064693	0.484528
PC11624_c0_g1	94.6312	0.238864	0.260733	0.916125	0.359602	0.766743
PC116246_c0_g1	77.0926	-0.29023	0.238345	-1.21769	0.223343	0.696917
PC116247_c0_g1	13.8087	-0.106054	0.320477	-0.330925	0.740701
PC11625_c0_g1	9.58155	-0.144844	0.347246	-0.417122	0.676589
PC11625_c0_g2	14.8777	-0.16397	0.297739	-0.550716	0.581828
PC116251_c0_g1	109.668	0.15695	0.483358	0.324708	0.745402	0.923553
PC116255_c0_g1	280.198	0.704706	0.867503	0.812338	0.416598	0.790728
[truncated: 25,443 more rows]

## Sheet: dsNode343-A2_vs_dsmGFP-2
transcript_id	baseMean	log2FoldChange	lfcSE	stat	pvalue	padj
PC0_c0_g1	535.265	0.0848988	0.195089	0.435179	0.663432	0.789578
PC0_c0_g2	121.762	0.189634	0.137653	1.37762	0.16832	0.323592
PC3465_c0_g3	84.5874	-7.75264	2.30524	-3.36305	0.00077086	0.0056561
PC37734_c0_g1	10.1597	-6.08417	0.885324	-6.87225	6.31956e-12	6.07077e-10
PC1_c0_g1	851.798	-0.204549	0.106138	-1.92719	0.0539562	0.147137
PC1_c0_g2	480.694	-0.428677	0.217732	-1.96883	0.0489731	0.137154
PC1_c0_g3	2316.87	-0.349233	0.18418	-1.89616	0.0579394	0.154592
PC1_c0_g4	154.753	0.453999	0.439186	1.03373	0.301263	0.477065
PC1_c0_g5	51.8833	0.412168	0.215508	1.91254	0.0558068	0.150515
PC1_c1_g1	135.984	-0.464849	0.26075	-1.78274	0.0746286	0.185323
PC12278_c0_g1	10.0032	-6.01673	0.92799	-6.48361	8.95517e-11	6.6443e-09
PC10_c0_g1	327.539	-0.0448619	0.106799	-0.42006	0.674442	0.79755
PC10_c1_g1	216.131	0.574752	0.580978	0.989284	0.322524	0.498733
PC100_c0_g1	520.72	0.387972	0.180889	2.1448	0.0319685	0.100855
PC100_c1_g1	57.7654	-0.615261	0.311426	-1.97563	0.0481971	0.135675
PC37362_c0_g2	7.21194	-6.0135	2.05055	-2.93263	0.00336103	0.0181855
PC100_c1_g5	25.6972	-0.173098	0.295155	-0.586465	0.557563	0.709667
PC3747_c0_g2	14.1519	-6.00003	0.870014	-6.89648	5.33073e-12	5.23099e-10
PC10000_c1_g2	12.1552	-0.134979	0.343941	-0.392448	0.694727	0.81179
PC10002_c0_g1	318.255	-0.443376	0.327719	-1.35292	0.176083	0.333319
PC12720_c0_g2	15.6829	-5.92641	1.13372	-5.22739	1.71917e-07	5.4857e-06
PC10003_c0_g1	9.35057	0.537511	0.40494	1.32739	0.184381	0.344308
PC15356_c0_g1	10.5697	-5.8967	0.928251	-6.35249	2.11855e-10	1.43568e-08
PC10004_c1_g1	100.315	-0.528361	0.265185	-1.99242	0.0463247	0.131968
PC10004_c2_g1	2.04593	-1.61944	1.5234	-1.06304	0.287763	0.462645
PC10005_c0_g1	44.7111	0.509686	0.27356	1.86316	0.0624396	0.16332
PC10006_c0_g1	36.259	-0.381568	0.505544	-0.754767	0.450389	0.61892
PC10006_c0_g2	16.6459	0.303157	0.47389	0.63972	0.522355	0.680469
PC10009_c0_g1	189.711	0.257912	0.178572	1.4443	0.148654	0.297566
PC19379_c0_g7	7.24691	-5.67797	1.26089	-4.50315	6.69543e-06	0.000120044
PC94142_c0_g1	10.2825	-5.64916	0.911949	-6.1946	5.84338e-10	3.60315e-08
PC3519_c0_g2	11.6096	-5.62516	0.904196	-6.22117	4.9345e-10	3.0844e-08
PC82769_c0_g1	7.2802	-5.60569	1.26771	-4.42191	9.78344e-06	0.000164124
PC16833_c1_g1	9.58383	-5.57575	0.99789	-5.58754	2.30312e-08	9.77594e-07
PC10014_c2_g1	6.70991	-0.756991	0.639284	-1.18412	0.236364	0.406711
PC100140_c0_g1	360.43	1.5537	0.875857	1.77392	0.0760764	0.187828
PC10016_c0_g1	748.696	0.0304613	0.170308	0.17886	0.858048	0.919942
PC10018_c1_g1	25.3986	0.258106	0.313694	0.822796	0.410624	0.583172
PC19565_c0_g1	6.13009	-5.54957	0.931659	-5.95665	2.57454e-09	1.37132e-07
PC1002_c0_g2	40.6605	0.081579	0.176535	0.462113	0.644	0.775196
PC1002_c1_g1	119.818	-0.125673	0.15298	-0.821497	0.411363	0.583795
PC1002_c1_g3	71.613	-0.346269	0.880164	-0.393415	0.694013	0.811406
PC34655_c0_g1	408.988	-5.51694	0.365874	-15.0788	2.23297e-51	3.39635e-48
PC10021_c0_g1	282.559	-0.143581	0.150617	-0.953287	0.340445	0.516926
PC42668_c0_g1	4.12355	-5.49215	2.49737	-2.19917	0.0278658	0.0912899
PC10023_c0_g1	239.45	-0.451154	0.256319	-1.76013	0.078386	0.192058
PC55922_c1_g3	8.42258	-5.45493	0.887682	-6.14514	7.98916e-10	4.78615e-08
PC10023_c0_g3	40.1399	-0.675741	0.389773	-1.73368	0.0829751	0.199562
PC10026_c0_g1	164.348	-0.34438	0.398856	-0.863418	0.387908	0.562299
PC10028_c0_g2	9.82482	0.351955	0.62434	0.563724	0.572942	0.721727
PC10028_c1_g1	6.23017	-1.20687	0.929245	-1.29877	0.194023	0.356615
PC1003_c0_g1	70.3813	0.0686043	0.202683	0.338481	0.735	0.839641
PC9445_c0_g1	25.0362	-5.45188	0.754596	-7.2249	5.01482e-13	5.76873e-11
PC10030_c0_g2	37.4162	0.450903	0.328709	1.37174	0.170145	0.326085
PC42359_c0_g8	6.44	-5.41358	0.90197	-6.00195	1.9496e-09	1.08709e-07
PC4234_c0_g1	541.424	-5.37873	0.46656	-11.5285	9.47921e-31	7.41491e-28
PC60526_c0_g1	9.08038	-5.36329	0.949326	-5.64958	1.60841e-08	7.16017e-07
PC10033_c0_g1	27.5008	0.0983872	0.252334	0.389909	0.696604	0.813323
PC5931_c0_g1	9.33123	-5.3548	0.941514	-5.68744	1.28961e-08	5.8455e-07
PC19379_c0_g4	20.6002	-5.3517	1.0677	-5.01235	5.37683e-07	1.4357e-05
PC10034_c0_g1	21.8054	-0.174994	0.311213	-0.562296	0.573914	0.722454
PC2629_c0_g3	57.5465	-5.35109	1.30957	-4.08615	4.38581e-05	0.000556416
PC10035_c0_g2	10.7562	-0.726608	0.469257	-1.54842	0.12152	0.25899
PC10036_c0_g1	1141.3	0.467787	0.219719	2.12902	0.0332526	0.103689
PC16039_c0_g3	7.35578	-5.34307	1.10224	-4.84745	1.25058e-06	2.97221e-05
PC1004_c0_g1	159.33	0.324482	0.255728	1.26885	0.204493	0.369545
PC10040_c0_g1	34.863	0.112864	0.929454	0.121431	0.90335	0.945799
PC10042_c0_g1	12.317	0.275803	0.828046	0.333077	0.739076	0.84224
PC10042_c0_g3	4.5006	-0.0163952	1.1417	-0.0143604	0.988542	0.993806
PC10225_c1_g1	16.1724	-5.34059	1.06652	-5.00749	5.51439e-07	1.46718e-05
PC21515_c0_g1	15.6554	-5.30653	0.851021	-6.23548	4.50389e-10	2.83466e-08
PC10044_c0_g1	10.9058	0.174081	0.38067	0.457303	0.647454	0.778001
PC31743_c3_g1	6.34694	-5.30452	0.896042	-5.91994	3.22055e-09	1.68267e-07
PC10047_c0_g1	40.2558	-0.00213616	0.178905	-0.0119402	0.990473	0.994845
PC4224_c7_g1	5.77407	-5.2839	0.988472	-5.34552	9.01592e-08	3.15649e-06
PC10048_c0_g1	10.986	-0.599179	0.406045	-1.47565	0.140039	0.285948
PC10048_c1_g1	31.7708	-0.823716	0.583319	-1.41212	0.157915	0.309338
PC21694_c2_g1	7.02087	-5.2797	1.05994	-4.98113	6.32156e-07	1.65145e-05
PC10048_c4_g1	13.0988	-0.540951	0.354308	-1.52678	0.126816	0.267012
PC10048_c7_g1	9.14808	0.150933	0.424602	0.355468	0.722239	0.831119
PC32584_c1_g1	11.2213	-5.27954	0.873301	-6.0455	1.48947e-09	8.46031e-08
PC10050_c0_g1	160.861	-0.0387037	0.179118	-0.216079	0.828926	0.902479
PC10050_c1_g1	303.782	-0.327604	0.307784	-1.0644	0.287149	0.461928
PC10055_c0_g1	12.6232	-0.490457	0.382507	-1.28222	0.199767	0.363403
PC10055_c2_g1	8.12091	0.292903	0.487224	0.601167	0.547729	0.702113
PC10055_c2_g2	14.583	-0.190711	0.337963	-0.564296	0.572553	0.721568
PC10058_c0_g1	15.5367	0.388605	0.522107	0.744301	0.456694	0.62403
PC2159_c0_g2	38.592	-5.26362	0.732837	-7.18253	6.84355e-13	7.6788e-11
PC1006_c0_g3	68.3155	-0.0688731	0.328105	-0.209912	0.833737	0.905149
PC19788_c0_g1	13.7005	-5.25508	0.918528	-5.7212	1.05776e-08	4.94189e-07
PC10065_c0_g1	707.755	0.294905	0.212019	1.39093	0.164245	0.318171
PC82872_c0_g1	4.53243	-5.23872	1.13433	-4.61833	3.86838e-06	7.6303e-05
PC10067_c0_g1	206.555	0.532815	0.465846	1.14376	0.252724	0.424613
PC10067_c0_g2	24.7434	-1.71568	1.33498	-1.28518	0.198729	0.362093
PC10067_c1_g1	9.42412	0.105634	0.444302	0.237753	0.812073	0.891028
PC10068_c0_g1	694.611	0.262404	0.180367	1.45483	0.145716	0.29389
PC6105_c0_g1	253.651	-5.20061	0.375287	-13.8577	1.14299e-43	1.20357e-40
PC10069_c0_g1	32.847	0.0111425	0.290194	0.0383968	0.969371	0.983125
PC10069_c0_g2	10.273	-0.27687	0.396419	-0.698429	0.484909	0.648536
PC13959_c0_g2	7.28888	-5.18542	0.886423	-5.84982	4.92096e-09	2.48572e-07
PC3747_c0_g1	23.559	-5.17588	0.76553	-6.76117	1.36883e-11	1.22872e-09
PC17612_c1_g1	4.39788	-5.16965	1.18635	-4.35759	1.31503e-05	0.000208288
PC10072_c0_g1	318.208	0.217214	0.152834	1.42124	0.155247	0.305914
PC10073_c0_g1	6.36567	-0.919823	0.4744	-1.93892	0.052511	0.144342
PC10074_c0_g1	53.8179	-0.27583	0.232071	-1.18856	0.234613	0.404613
PC10076_c0_g1	27.7844	-0.157242	0.308644	-0.509461	0.610429	0.750361
PC1008_c0_g1	168.343	0.334212	0.268161	1.24631	0.21265	0.379229
PC10082_c0_g1	215.671	-0.0230948	0.160687	-0.143726	0.885717	0.935827
PC10082_c1_g1	3569.37	-0.266057	0.280707	-0.947811	0.343225	0.519556
PC10084_c0_g1	36.0899	0.138794	0.191281	0.7256	0.468084	0.633413
PC10087_c0_g1	7284.87	0.502005	0.352021	1.42607	0.153849	0.304144
PC10089_c2_g1	16.264	-0.329924	0.492756	-0.669549	0.503145	0.664213
PC1009_c0_g1	756.77	0.0146495	0.112128	0.13065	0.896052	0.941804
PC1009_c0_g2	13.979	-0.0874726	0.335811	-0.260482	0.794492	0.880169
PC1009_c1_g1	11.2306	0.478513	0.389522	1.22846	0.219273	0.387057
PC1009_c1_g2	6.64902	0.427208	0.741723	0.575967	0.564638	0.715372
PC15221_c0_g2	18.8614	-5.16211	0.789639	-6.53731	6.26364e-11	4.87176e-09
PC19650_c0_g1	5.52085	-5.15749	0.89741	-5.74709	9.07941e-09	4.30808e-07
PC10092_c0_g1	7.26921	-0.74157	0.459027	-1.61552	0.106197	0.236091
PC10092_c1_g1	37.0554	0.0355903	0.225196	0.158041	0.874424	0.92942
PC10093_c0_g1	36.4441	0.367111	0.604754	0.607042	0.543823	0.698599
PC27502_c0_g2	6.24216	-5.14709	0.931354	-5.52646	3.26763e-08	1.3041e-06
PC33983_c0_g1	9.9188	-5.13264	1.09747	-4.67677	2.91425e-06	6.06739e-05
PC10096_c0_g1	213.828	0.127136	0.219747	0.578555	0.562889	0.714024
PC101_c0_g2	380.416	-0.369077	0.180947	-2.0397	0.0413806	0.121497
PC101_c0_g3	927.536	0.030868	0.105523	0.292525	0.769885	0.862859
PC14221_c0_g1	8.75374	-5.08818	0.91372	-5.56864	2.56732e-08	1.0731e-06
PC101_c3_g1	179.457	0.0735427	0.203415	0.361541	0.717695	0.827747
PC1010_c0_g1	1074.98	0.129323	0.144584	0.894451	0.37108	0.545766
PC10101_c3_g1	12.1242	0.252643	0.371231	0.680554	0.496153	0.65838
PC10102_c0_g1	1099.62	0.200436	0.118196	1.6958	0.0899243	0.210729
PC6045_c0_g1	8.06196	-5.07454	0.923951	-5.49222	3.96922e-08	1.55464e-06
PC10107_c0_g2	7.36964	-0.83413	0.421716	-1.97794	0.0479351	0.13524
PC10107_c1_g1	8.69824	0.268407	0.503324	0.53327	0.593847	0.738411
PC10108_c0_g1	7.82232	0.380152	0.504391	0.753687	0.451037	0.619345
PC6570_c0_g1	13.4046	-5.07403	0.854524	-5.93784	2.88804e-09	1.52938e-07
PC1011_c1_g1	15.4552	-0.601352	0.40803	-1.47379	0.140537	0.28673
PC10110_c0_g1	25.4088	0.119856	0.43227	0.277272	0.781572	0.871474
PC10110_c0_g2	15.9584	0.569306	0.486223	1.17088	0.241649	0.41246
PC10110_c0_g3	25.4953	-0.353724	0.249147	-1.41974	0.155683	0.306426
PC10113_c0_g1	21.4861	0.45527	0.335684	1.35624	0.175022	0.331915
PC57_c8_g1	5.89139	-5.07189	0.953227	-5.32076	1.03336e-07	3.54083e-06
PC41432_c0_g1	43.8211	-5.06811	0.864715	-5.86102	4.60044e-09	2.33242e-07
PC23289_c0_g2	5.56578	-5.06527	0.941117	-5.38219	7.35831e-08	2.62654e-06
PC10117_c0_g1	15.8801	0.798511	0.487977	1.63637	0.101762	0.229436
PC10118_c0_g1	11.9299	0.392525	0.386115	1.0166	0.309343	0.485246
PC15221_c0_g1	4.88144	-5.06463	0.941818	-5.3775	7.55254e-08	2.68189e-06
PC1012_c0_g1	58.9018	0.254918	0.168088	1.51657	0.129374	0.271003
PC1012_c0_g2	20.5394	0.12494	0.277771	0.449794	0.652859	0.782402
PC37007_c1_g1	4.79604	-5.06115	1.09489	-4.62253	3.79095e-06	7.51003e-05
PC10124_c0_g1	447.954	0.325	0.224453	1.44796	0.147628	0.296447
PC10125_c0_g1	121.141	-0.551448	0.57884	-0.952677	0.340754	0.517259
PC1089_c1_g2	28.019	-5.04432	0.694967	-7.25836	3.918e-13	4.64359e-11
PC10128_c0_g1	49.0145	-0.176761	0.234783	-0.75287	0.451528	0.619925
PC10129_c0_g1	1028.51	0.515915	0.383501	1.34528	0.178535	0.336543
PC1013_c0_g1	253.819	-0.369567	0.18425	-2.00579	0.0448789	0.129007
PC1013_c3_g1	10.5527	-0.309041	0.365137	-0.846369	0.397347	0.571203
PC116752_c0_g1	70.9973	-4.98451	0.924759	-5.39007	7.04312e-08	2.52391e-06
PC10133_c0_g1	726.243	0.20176	0.276545	0.729576	0.465649	0.63128
PC10134_c0_g2	8.35814	0.526841	0.495727	1.06276	0.287889	0.462738
PC10135_c0_g1	190.855	0.326619	0.236413	1.38156	0.167106	0.321982
PC10137_c0_g3	9.60294	0.903982	0.454693	1.98812	0.0467989	0.133055
PC1014_c0_g1	262.077	-0.0285164	0.0935533	-0.304814	0.760508	0.856345
PC10140_c0_g1	76.1009	0.334289	0.209084	1.59882	0.10986	0.241469
PC10142_c0_g1	30.6374	-0.36631	0.329295	-1.11241	0.265963	0.439441
PC10143_c0_g1	524.379	0.18301	0.273188	0.669905	0.502918	0.664009
PC10145_c0_g1	4.72053	-0.125481	0.787275	-0.159386	0.873365	0.928667
PC10146_c0_g2	7.31445	-0.30469	0.452741	-0.67299	0.500953	0.662182
PC1015_c0_g1	2180.27	0.695678	0.443963	1.56697	0.117122	0.252445
PC10151_c0_g1	11.7565	0.680143	0.576003	1.1808	0.237683	0.408159
PC101524_c0_g1	1.38587	-1.65212	1.70967	-0.966336	0.333876	0.510548
PC101546_c0_g1	5.53592	-1.06088	0.49702	-2.13449	0.032803	0.102638
PC10155_c0_g1	8.43055	-0.0356314	0.364516	-0.0977499	0.922131	0.957021
PC10158_c0_g1	14.2137	0.389255	0.333314	1.16783	0.242874	0.41401
PC10159_c0_g1	67.4785	0.42428	0.235847	1.79896	0.0720247	0.180941
PC1016_c0_g1	289.581	0.0719002	0.208416	0.344984	0.730107	0.836599
PC1090_c1_g1	9.99882	-4.98019	0.914509	-5.44575	5.15863e-08	1.92941e-06
PC10163_c0_g1	43.3893	0.171382	0.191871	0.893216	0.371741	0.546357
PC10164_c0_g1	49.3224	-0.148864	0.291943	-0.509907	0.610116	0.750124
PC10165_c0_g1	34.802	0.589776	0.284419	2.07362	0.0381151	0.114258
PC11717_c0_g1	22.3142	-4.96831	0.785406	-6.32579	2.51943e-10	1.68648e-08
PC10168_c0_g2	30.1531	-0.358453	0.392597	-0.91303	0.361227	0.536578
PC7065_c1_g2	3.95303	-4.95887	1.09809	-4.5159	6.30489e-06	0.000114771
PC10169_c0_g1	129.244	0.160858	0.147703	1.08906	0.276126	0.450309
PC1017_c0_g1	7.6934	0.0461703	0.382901	0.12058	0.904023	0.946157
PC1017_c1_g1	142.297	0.135296	0.169556	0.797939	0.424906	0.596323
PC26541_c0_g1	3.56316	-4.95648	1.25688	-3.94347	8.03099e-05	0.000911955
PC10170_c1_g1	52.6722	-0.68365	0.391528	-1.74611	0.0807924	0.195982
PC10173_c0_g1	157.029	0.324712	0.18006	1.80335	0.0713326	0.179687
PC10174_c0_g1	413.801	-0.351501	0.193932	-1.8125	0.0699087	0.177202
PC10175_c0_g1	34.349	0.429349	0.463113	0.927094	0.353878	0.529743
PC10176_c0_g1	132.775	0.123986	0.211947	0.584987	0.558557	0.710401
PC10179_c0_g1	12.7931	0.532561	0.319982	1.66435	0.0960435	0.220575
PC22029_c0_g1	6.86061	-4.95417	0.912156	-5.43128	5.59521e-08	2.05618e-06
PC1018_c0_g1	2932.63	0.898781	0.726759	1.2367	0.2162	0.383569
PC10180_c0_g3	8.12094	0.820974	0.388712	2.11204	0.0346834	0.106704
PC10180_c1_g1	13.1881	-0.286008	0.316079	-0.90486	0.365539	0.540929
PC10181_c0_g1	1362.48	0.441795	0.223416	1.97746	0.0479901	0.135276
PC10183_c0_g1	408.821	0.964385	0.51964	1.85587	0.0634722	0.165216
PC10185_c0_g1	13.2617	-0.746337	1.64683	-0.453195	0.650408	0.780353
PC10185_c0_g2	41.399	0.0743236	0.248601	0.298968	0.764965	0.859213
PC10185_c0_g4	20.1459	-1.21383	0.972536	-1.24811	0.21199	0.378449
PC21083_c0_g1	8.61354	-4.92502	0.911011	-5.40611	6.44083e-08	2.32635e-06
PC10187_c0_g1	6.64655	-0.169754	0.429364	-0.395363	0.692575	0.810382
PC1019_c0_g1	547.665	0.13817	0.135984	1.01607	0.309597	0.485516
PC1019_c0_g2	478.184	0.223656	0.244114	0.916192	0.359566	0.535011
PC1019_c1_g1	364.303	0.0106556	0.0844539	0.12617	0.899597	0.943863
PC1019_c3_g1	567.202	0.0953967	0.161626	0.59023	0.555036	0.707933
PC1019_c8_g1	6.52079	0.689999	0.497993	1.38556	0.165882	0.320321
PC10190_c0_g1	27.4328	-0.865123	0.649126	-1.33275	0.182614	0.341898
PC2821_c0_g6	9.93307	-4.91651	0.945518	-5.19981	1.99496e-07	6.24205e-06
PC2066_c1_g1	1763.15	-4.91558	0.245961	-19.9852	7.41223e-89	6.7644e-85
PC10196_c0_g1	28.9128	0.251944	0.601313	0.41899	0.675224	0.798234
PC10199_c0_g1	8.91597	-0.428828	0.372739	-1.15048	0.249947	0.421581
PC31506_c0_g2	12.5916	-4.90531	0.895237	-5.47934	4.26914e-08	1.64381e-06
PC102_c0_g1	25.1628	-0.0386582	0.280397	-0.13787	0.890344	0.938542
PC6951_c0_g1	32.0001	-4.90447	0.638934	-7.67602	1.64104e-14	2.34001e-12
PC5417_c2_g2	4.44153	-4.89262	0.994122	-4.92155	8.58624e-07	2.12929e-05
PC15517_c0_g1	6.98927	-4.88965	0.89243	-5.47903	4.27676e-08	1.64381e-06
PC22700_c1_g1	11.869	-4.88036	0.93765	-5.20489	1.94116e-07	6.08762e-06
PC10206_c0_g1	19751.8	0.299979	0.401878	0.746443	0.4554	0.623148
PC12481_c0_g1	5.42916	-4.87235	0.908364	-5.36387	8.1457e-08	2.88131e-06
PC5077_c1_g2	14.0278	-4.84477	0.860811	-5.62814	1.82159e-08	8.00507e-07
PC1021_c0_g1	141.48	-0.780126	0.366581	-2.12812	0.0333274	0.103804
PC1021_c1_g1	892.025	-0.139625	0.280589	-0.497615	0.618755	0.756263
PC10210_c0_g1	40.2927	-0.536815	0.307485	-1.74582	0.0808416	0.196022
PC10211_c0_g1	26168.9	1.37623	0.988836	1.39177	0.163992	0.317792
PC10769_c0_g2	21.2317	-4.82759	0.727161	-6.63895	3.15924e-11	2.59741e-09
PC10212_c1_g1	8.18009	0.113824	0.770987	0.147634	0.882632	0.934311
PC19488_c0_g1	172.69	-4.82024	0.581871	-8.28404	1.19065e-16	2.32841e-14
PC18678_c0_g1	10.3917	-4.78922	1.00679	-4.75694	1.96548e-06	4.34309e-05
PC116493_c0_g1	4.15068	-4.7884	0.924048	-5.18198	2.19542e-07	6.76552e-06
PC13270_c1_g1	5.65379	-4.78809	0.995803	-4.80827	1.52243e-06	3.5085e-05
PC18959_c0_g1	4.19718	-4.78603	0.943494	-5.07266	3.92285e-07	1.1038e-05
PC10217_c0_g1	82.3103	-0.0914192	0.168892	-0.541287	0.58831	0.733976
PC10218_c0_g1	27.8349	-0.179854	0.470708	-0.382091	0.702394	0.817052
PC1022_c0_g1	162.527	0.198452	0.185163	1.07177	0.283823	0.458519
PC1022_c0_g3	414.117	-0.262151	0.195421	-1.34147	0.179769	0.33812
PC10220_c0_g1	8.58225	0.0704757	0.548068	0.128589	0.897683	0.942743
PC10220_c0_g2	471.947	0.0964942	0.166623	0.579116	0.562511	0.713743
PC10220_c1_g1	4.31919	-1.0141	0.691909	-1.46565	0.142743	0.289762
PC10220_c1_g4	5.50922	-0.90779	0.817444	-1.11052	0.266774	0.440482
PC10221_c0_g1	104.452	0.177047	0.499723	0.354291	0.723121	0.831628
PC10222_c0_g1	28.1175	-0.414833	0.642367	-0.645788	0.518417	0.677319
PC10224_c0_g1	8.2968	-0.739815	0.571885	-1.29364	0.195789	0.358645
PC10224_c3_g1	3.93391	0.0267465	0.827135	0.0323364	0.974204	0.985944
PC10225_c0_g1	5.89019	-1.11497	0.538493	-2.07055	0.0384013	0.114864
PC10225_c0_g2	16.5361	0.0143756	0.608646	0.023619	0.981157	0.989772
PC148_c0_g1	12851.6	-4.77985	0.189879	-25.1731	7.89025e-140	2.16019e-135
PC14286_c0_g2	6.25948	-4.77571	1.01652	-4.69809	2.6261e-06	5.53057e-05
PC3066_c0_g2	4.5596	-4.77337	0.999397	-4.77625	1.78598e-06	4.00791e-05
PC10227_c0_g1	70.3015	0.216413	0.231809	0.933586	0.350517	0.526728
PC10228_c0_g1	6.34339	-0.602595	0.690112	-0.873186	0.382562	0.557086
PC15309_c0_g1	7.07803	-4.77072	0.896143	-5.32361	1.01726e-07	3.50322e-06
PC1023_c0_g2	292.166	-0.33784	0.165926	-2.03609	0.0417411	0.122326
PC1023_c0_g3	114.534	0.242001	0.205222	1.17922	0.238312	0.408983
PC1023_c1_g1	44.1028	-0.303117	0.198745	-1.52515	0.127221	0.267722
PC1023_c3_g1	38.9969	-0.21677	0.312532	-0.693593	0.487937	0.651265
PC10230_c1_g1	10.395	-0.962367	0.792283	-1.21468	0.22449	0.393198
PC10231_c0_g1	63.4163	-0.421209	0.332661	-1.26618	0.205448	0.370789
PC10231_c0_g3	6.79836	-0.361619	0.435357	-0.830627	0.406184	0.579254
PC10232_c0_g1	111.86	-0.832028	0.394609	-2.10849	0.0349887	0.107414
PC23786_c0_g1	3.19493	-4.77029	1.34464	-3.54763	0.000388712	0.00325648
PC26990_c0_g1	2.89882	-4.76198	1.1389	-4.18123	2.89938e-05	0.000396698
PC1762_c1_g1	4.94489	-4.74769	0.938829	-5.05704	4.25821e-07	1.18597e-05
PC10323_c1_g3	8.03099	-4.72057	0.902089	-5.23293	1.66847e-07	5.3426e-06
PC10235_c0_g1	85.2081	0.0258183	0.187905	0.137401	0.890714	0.938644
PC128581_c0_g1	4.32312	-4.69973	1.04473	-4.49853	6.8426e-06	0.000121964
PC19085_c1_g1	4.98896	-4.69845	0.935779	-5.0209	5.14303e-07	1.38728e-05
PC29986_c0_g1	9.88822	-4.69827	0.915776	-5.13036	2.89185e-07	8.56017e-06
PC10238_c0_g1	5.20763	-0.121587	0.594619	-0.204479	0.837979	0.908134
PC29091_c0_g1	11.7543	-4.69663	0.883879	-5.31366	1.07444e-07	3.6361e-06
PC17461_c0_g1	4.7019	-4.65326	1.00784	-4.61707	3.89204e-06	7.66592e-05
PC49781_c0_g1	17.5495	-4.65202	0.872735	-5.33039	9.80025e-08	3.3835e-06
PC10240_c0_g1	71.0654	-0.831738	0.530872	-1.56674	0.117176	0.252482
PC10241_c0_g1	55.7146	-0.299556	0.292747	-1.02326	0.306185	0.482238
PC10242_c0_g1	4.65251	-0.875043	0.619451	-1.41261	0.15777	0.309266
PC96_c0_g2	2.44659	-4.6498	1.47356	-3.1555	0.00160226	0.0101426
PC36593_c0_g1	8.60565	-4.64549	0.92491	-5.02264	5.09659e-07	1.38016e-05
PC8722_c4_g1	6.46268	-4.64477	1.0243	-4.5346	5.7714e-06	0.000106404
PC10245_c0_g1	79.5307	-0.52651	0.438625	-1.20037	0.229997	0.3993
PC10246_c0_g1	24.0976	0.475724	0.292164	1.62827	0.103467	0.23198
PC102499_c0_g1	29.5534	-2.23139	1.95254	-1.14282
PC1025_c0_g1	305.067	0.373884	0.259954	1.43827	0.150358	0.2996
PC16750_c0_g1	13.5266	-4.64086	0.814474	-5.69798	1.21234e-08	5.55968e-07
PC1025_c1_g2	226.713	-0.444228	0.275229	-1.61403	0.10652	0.236426
PC1025_c2_g1	137.397	-0.649559	0.367174	-1.76908	0.0768805	0.18925
PC1025_c3_g1	24.5931	0.362149	0.332645	1.0887	0.276288	0.450546
PC1025_c6_g1	4.8994	-1.06973	0.549166	-1.94793	0.0514239	0.142067
PC10250_c0_g1	44.4192	-0.124911	0.214322	-0.582817	0.560016	0.711666
PC7544_c0_g1	40.8603	-4.63298	0.467897	-9.9017	4.09241e-23	1.75066e-20
PC10251_c0_g2	24.4507	0.113649	0.243713	0.466324	0.640983	0.772634
PC10251_c1_g2	16.9127	0.411196	0.500138	0.822164	0.410983	0.583484
PC10251_c2_g1	17.0636	-0.743546	0.40167	-1.85114	0.0641495	0.166356
PC10251_c3_g1	7.21706	0.369115	0.473369	0.779763	0.435531	0.605432
PC19209_c0_g1	7.29074	-4.63151	0.884038	-5.23904	1.61415e-07	5.19296e-06
PC10254_c0_g1	20.8259	-0.214361	0.301987	-0.709836	0.477806	0.642031
PC10256_c3_g1	4.90289	-1.39935	0.660037	-2.12011	0.0339971	0.105338
PC10257_c0_g1	252.723	-0.017886	0.215622	-0.0829509	0.933891	0.963923
PC10259_c0_g3	25.516	0.512725	0.325929	1.57312	0.115691	0.250149
PC1026_c0_g1	4915.25	0.172253	0.178273	0.96623	0.333929	0.510601
PC10260_c0_g2	134.621	-0.0407123	0.209848	-0.194009	0.846169	0.913066
PC10261_c0_g1	12.1495	0.0997987	0.454136	0.219755	0.826062	0.900575
PC11949_c0_g1	2.83235	-4.62264	1.28202	-3.60575	0.00031125	0.00273648
PC8437_c0_g3	5.2404	-4.62182	0.915068	-5.05079	4.39985e-07	1.21308e-05
PC7551_c4_g1	5.78927	-4.61924	0.913745	-5.05528	4.29758e-07	1.18991e-05
PC10263_c2_g1	17.3216	0.310622	0.281	1.10541	0.26898	0.442742
PC10263_c3_g1	13.3147	-0.448912	0.508324	-0.883122	0.37717	0.551671
PC10263_c6_g1	7.05501	-0.650126	0.453068	-1.43494	0.151304	0.300806
PC10264_c0_g1	21.9075	-0.288529	0.437716	-0.65917	0.509787	0.669205
PC6576_c0_g1	70.1908	-4.61428	0.536939	-8.59367	8.42329e-18	2.05904e-15
PC10266_c0_g2	14.4165	0.853901	0.536415	1.59187	0.111415	0.243716
PC10362_c0_g1	6.75578	-4.61279	1.06809	-4.31874	1.56921e-05	0.000240818
PC10269_c0_g1	32.4735	0.286464	0.326266	0.878008	0.37994	0.554418
PC1027_c0_g1	87.2882	-0.0514045	0.263115	-0.195369	0.845104	0.912497
PC1027_c0_g2	39.8075	0.0167199	0.335405	0.0498498	0.960242	0.978174
PC1027_c1_g1	528.331	-0.211897	0.267342	-0.792607	0.428007	0.598818
PC1027_c1_g3	452.997	-0.0247521	0.423559	-0.0584383	0.9534	0.974507
PC15530_c1_g1	7.82041	-4.60696	0.964406	-4.77699	1.77941e-06	3.99802e-05
PC1027_c2_g2	202.986	0.60036	0.419965	1.42955	0.152847	0.302753
PC53967_c0_g1	2.92221	-4.60135	1.36099	-3.38089	0.000722508	0.00537961
PC10273_c0_g1	1388.49	-0.166982	0.108973	-1.53232	0.125444	0.264736
PC10273_c1_g1	407.103	0.064205	0.281715	0.227907	0.819718	0.896256
PC10274_c0_g1	12.481	-0.716177	0.60978	-1.17448	0.240201	0.411066
PC10276_c0_g1	327.696	-0.183295	0.496839	-0.368923	0.712185	0.82417
PC14857_c0_g1	5.24647	-4.60115	1.04527	-4.40188	1.07319e-05	0.000177427
PC32542_c0_g2	7.19643	-4.59577	0.976674	-4.70553	2.53213e-06	5.36569e-05
PC10278_c0_g1	7.35339	-0.641305	0.467734	-1.37109	0.170347	0.326251
PC23562_c0_g1	10.2076	-4.59405	0.874105	-5.25572	1.47446e-07	4.85191e-06
PC10279_c1_g1	6.54917	0.51651	0.459039	1.1252	0.260505	0.433608
PC1028_c0_g1	258.401	-0.02472	0.176335	-0.140188	0.888511	0.937513
PC1028_c0_g2	274.497	-0.510663	0.244565	-2.08805	0.0367934	0.111381
PC1028_c0_g3	27.8131	-0.389527	0.250759	-1.55339	0.120329	0.257192
PC3887_c0_g1	560.708	-4.58167	0.342446	-13.3792	7.99764e-41	8.1096e-38
PC10280_c0_g2	14.9906	-0.552986	0.401475	-1.37739	0.168393	0.323708
PC10281_c3_g1	23.5005	-0.285644	0.367544	-0.777169	0.437059	0.606909
PC10282_c0_g1	37.2972	-0.112714	0.240315	-0.469027	0.63905	0.771275
PC10283_c0_g1	78.234	0.0797673	0.16122	0.494773	0.62076	0.757698
PC10283_c0_g2	6.13204	-0.377316	0.445639	-0.846686	0.39717	0.570979
PC10283_c0_g3	125.233	1.73811	0.921416	1.88635	0.0592479	0.15721
PC23737_c0_g2	7.03294	-4.57681	0.892792	-5.1264	2.95328e-07	8.71281e-06
PC22636_c0_g1	4.72895	-4.57297	0.937987	-4.8753	1.08641e-06	2.61598e-05
PC10287_c1_g1	593.653	0.279484	0.138189	2.02247	0.0431275	0.125398
PC10288_c0_g1	89.4374	0.680184	0.386696	1.75896	0.0785836	0.192328
PC1029_c0_g1	678.875	0.1329	0.368412	0.360738	0.718295	0.828369
PC10290_c0_g1	17.073	-0.452347	0.339794	-1.33124	0.18311	0.342548
PC14699_c1_g4	3.08857	-4.55447	1.16868	-3.89709	9.73545e-05	0.00106572
PC14952_c3_g1	5.36058	-4.54434	0.92015	-4.9387	7.86444e-07	1.9808e-05
PC22332_c0_g1	3.06618	-4.54328	1.39609	-3.25429	0.00113675	0.00771683
PC10291_c0_g1	6.0666	-0.994723	0.615961	-1.61491	0.10633	0.236192
PC9963_c0_g1	8.41992	-4.54217	0.961283	-4.72512	2.29984e-06	4.96966e-05
PC10296_c0_g1	20.8171	0.2374	0.546342	0.434527	0.663906	0.790004
PC10298_c0_g2	7.7838	-0.988429	0.527729	-1.87299	0.0610702	0.160721
PC103_c0_g1	161.665	-0.433512	0.21013	-2.06306	0.0391068	0.11644
PC37380_c2_g1	3.16796	-4.5415	0.990725	-4.58402	4.56119e-06	8.7326e-05
PC1030_c0_g1	122.648	-0.16583	0.203183	-0.81616	0.414409	0.586704
PC4915_c0_g2	5.00485	-4.53751	0.892183	-5.08585	3.65978e-07	1.0459e-05
PC10301_c1_g1	18.2572	-0.932874	0.481912	-1.93578	0.0528949	0.145027
PC10301_c4_g1	4.45565	-1.50183	1.76092	-0.852871	0.393731	0.567905
PC10304_c0_g1	257.571	-0.0912871	0.213607	-0.42736	0.669117	0.793745
PC10305_c0_g2	4.80027	-0.644999	0.673578	-0.957572	0.338279	0.51491
PC10308_c1_g1	16.0503	0.422649	0.463772	0.911328	0.362122	0.537555
PC1031_c0_g1	291.561	0.162573	0.13392	1.21396	0.224764	0.393438
PC1031_c0_g2	302.066	-0.146503	0.255717	-0.57291	0.566705	0.71695
PC42282_c1_g1	4.26037	-4.52906	0.971078	-4.66395	3.10194e-06	6.37864e-05
PC3149_c0_g3	4.86486	-4.50887	0.949276	-4.7498	2.03621e-06	4.47126e-05
PC6516_c1_g1	7.80938	-4.49668	0.896396	-5.0164	5.26475e-07	1.41451e-05
PC32064_c0_g2	4.98776	-4.49279	1.15028	-3.90582	9.39067e-05	0.00103494
PC10313_c0_g1	10.2599	-0.69325	0.370279	-1.87224	0.061174	0.16087
PC10313_c0_g2	7.02385	-0.339582	0.492385	-0.689668	0.490403	0.653378
PC10313_c0_g3	483.782	0.31335	0.416864	0.751684	0.452241	0.620576
PC10313_c0_g4	128.529	-0.37585	0.60675	-0.619448	0.535621	0.692134
PC10315_c0_g1	8.17988	0.757056	0.49714	1.52282	0.127803	0.268652
PC10315_c0_g2	38.9585	-0.0883894	0.258294	-0.342205	0.732197	0.837966
PC10318_c1_g1	45.1763	-0.781402	0.367804	-2.12451	0.0336277	0.10442
PC17177_c0_g2	7.7217	-4.48629	0.935256	-4.79686	1.61172e-06	3.68636e-05
PC157_c2_g1	5007.54	-4.48312	0.234795	-19.0937	2.84751e-81	1.94897e-77
PC1032_c0_g2	819.66	-0.16863	0.105187	-1.60314	0.108904	0.240174
PC12909_c0_g1	791.906	-4.47279	0.250439	-17.8598	2.425e-71	1.32783e-67
PC1032_c1_g1	22.8758	-0.0433418	0.267427	-0.16207	0.871251	0.927618
PC11778_c1_g2	4.59883	-4.46864	0.992315	-4.50325	6.69233e-06	0.000120044
PC54533_c0_g1	4.91796	-4.46418	0.991016	-4.50465	6.64816e-06	0.00011951
PC1032_c4_g1	10.7719	0.514595	0.52711	0.976256	0.328937	0.505453
PC1032_c5_g1	19.4473	-0.181488	0.353626	-0.513219	0.607798	0.748654
PC1032_c5_g2	34.8994	-0.542871	0.289546	-1.8749	0.0608061	0.160211
PC1032_c6_g1	18.063	-0.145296	0.420128	-0.345838	0.729465	0.836292
PC1032_c7_g1	215.27	0.177597	0.15292	1.16137	0.245492	0.416578
PC1032_c8_g1	29.6225	-0.261066	0.277509	-0.940748	0.346834	0.522941
PC10321_c0_g1	30.4239	0.138245	0.258065	0.535697	0.592168	0.737194
PC398_c2_g1	4.70619	-4.4621	0.91644	-4.86895	1.12191e-06	2.69435e-05
PC18345_c0_g2	3.89642	-4.45283	0.955023	-4.66254	3.12329e-06	6.40519e-05
PC16543_c0_g1	4.42392	-4.43998	0.917625	-4.83856	1.30783e-06	3.09944e-05
PC10324_c2_g1	16.0043	0.959498	0.957603	1.00198	0.316354	0.492482
PC10325_c0_g1	90.9559	-0.0686664	0.159835	-0.429608	0.667481	0.792605
PC10325_c1_g1	154.092	0.349955	0.399574	0.875821	0.381127	0.555658
PC10326_c3_g1	34.9354	-0.0394571	0.311757	-0.126564	0.899286	0.943677
PC5345_c1_g2	4.2408	-4.43065	0.989935	-4.4757	7.61605e-06	0.000132473
PC10327_c0_g1	105.148	0.16918	0.226809	0.745917	0.455718	0.623365
PC10327_c1_g1	24.5255	-0.2869	0.27201	-1.05474	0.291545	0.466653
PC16279_c1_g1	8.06796	-4.42913	1.05177	-4.21111	2.54121e-05	0.000357152
PC1033_c0_g1	41104	0.378106	0.336204	1.12463	0.260744	0.433829
PC1033_c0_g2	357.725	0.300569	0.417255	0.720348	0.471311	0.636339
PC1033_c4_g1	6764.55	0.665609	0.38304	1.7377	0.0822633	0.198395
PC10331_c0_g1	95.7753	0.0121236	0.243621	0.0497643	0.96031	0.978174
PC10333_c0_g1	7.10867	0.0405058	0.545543	0.0742486	0.940813	0.967807
PC10334_c0_g1	1602.62	-0.130499	0.109848	-1.188	0.234835	0.404843
PC22072_c0_g2	7.32876	-4.42497	0.934448	-4.73538	2.18644e-06	4.74706e-05
PC26451_c0_g1	3.579	-4.41252	1.07912	-4.089	4.33239e-05	0.00055066
PC11342_c5_g1	4.7011	-4.40737	0.935664	-4.71042	2.47204e-06	5.2669e-05
PC19732_c0_g1	2.83117	-4.39386	1.05586	-4.1614	3.16299e-05	0.000427425
PC10342_c0_g1	4.9436	-0.533803	0.664825	-0.802923	0.422019	0.593682
PC37397_c0_g1	3.03772	-4.3892	1.14593	-3.83026	0.000128007	0.00133051
PC10346_c0_g1	36.9394	-0.456016	0.410642	-1.11049	0.266786	0.440482
PC10346_c0_g2	46.7712	0.318222	0.203368	1.56476	0.117639	0.253122
PC10347_c0_g1	303.242	0.261165	0.135139	1.93257	0.0532894	0.145794
PC18351_c1_g2	79.7778	-4.38751	0.835973	-5.24839	1.53438e-07	5.00695e-06
PC10351_c0_g2	8.24199	-0.335602	0.400092	-0.838811	0.401575	0.575118
PC16429_c0_g1	4.952	-4.38543	0.910453	-4.81675	1.45916e-06	3.39107e-05
PC6502_c0_g1	3.06383	-4.3783	0.938048	-4.66746	3.04948e-06	6.29153e-05
PC15420_c0_g1	5.15855	-4.37451	0.922649	-4.74125	2.12402e-06	4.6262e-05
PC29508_c0_g1	4.37562	-4.3745	0.970576	-4.50712	6.57144e-06	0.000118316
PC10356_c0_g1	39.6947	0.0262929	0.259599	0.101283	0.919326	0.955264
PC10356_c0_g2	9.03174	-0.537886	0.449068	-1.19778	0.231001	0.400555
PC52127_c0_g1	3.37251	-4.37208	1.26955	-3.44379	0.000573611	0.00446727
PC22207_c1_g2	8.48568	-4.35945	1.00757	-4.32671	1.51355e-05	0.000233585
PC8925_c0_g1	140.191	-4.35722	0.29021	-15.014	5.94276e-51	8.13504e-48
PC10360_c0_g1	104.944	-0.40498	0.265901	-1.52305	0.127747	0.26856
PC10361_c0_g1	23.7201	-0.302659	0.315516	-0.959249	0.337433	0.514265
PC42954_c0_g1	4.60017	-4.35328	0.918636	-4.73885	2.14938e-06	4.67773e-05
PC10363_c0_g1	15.4388	0.169781	0.294376	0.57675	0.564108	0.714875
PC10364_c0_g1	235.011	-0.0890058	0.252505	-0.352492	0.72447	0.832369
PC1037_c0_g1	353.83	-0.468364	0.257869	-1.81629	0.0693261	0.1761
PC10370_c0_g2	183.53	-0.0129302	0.243626	-0.0530739	0.957673	0.976724
PC14767_c0_g2	4.39038	-4.3317	1.35644	-3.19344	0.00140591	0.00913536
PC10371_c0_g1	7.70657	-0.321016	0.430296	-0.746036	0.455646	0.623328
PC10373_c0_g3	17.6709	-0.160663	0.672387	-0.238944	0.811149	0.890371
PC10374_c0_g1	15.2299	-0.0878263	0.669963	-0.131091	0.895703	0.941546
PC10375_c1_g1	6.10194	-0.667537	0.567546	-1.17618	0.239522	0.41034
PC10376_c0_g1	9.15565	0.239738	0.586103	0.409038	0.682512	0.803345
PC10379_c0_g1	6.73432	0.241392	0.413092	0.584354	0.558982	0.710687
PC9728_c2_g1	4.69883	-4.32969	0.995992	-4.34711	1.37941e-05	0.000216875
PC1038_c1_g1	538.205	-0.158464	0.154024	-1.02883	0.303559	0.479314
PC1038_c2_g1	661.464	0.0263673	0.104065	0.253373	0.79998	0.883226
PC1038_c2_g2	134.705	-0.19836	0.19508	-1.01681	0.309243	0.485183
PC1038_c2_g3	46.5439	0.0533388	0.333854	0.159767	0.873065	0.928407
PC247_c5_g2	8.88361	-4.3291	0.898801	-4.81653	1.46076e-06	3.39107e-05
PC1038_c3_g1	2239.3	0.671391	0.599104	1.12066	0.262433	0.435686
PC3197_c2_g1	158.893	-4.32856	0.521505	-8.30013	1.03996e-16	2.09352e-14
PC1038_c5_g1	16.504	-0.0214885	0.30314	-0.0708865	0.943488	0.968973
PC1038_c6_g1	40.0424	0.18451	0.191398	0.964014	0.335039	0.511812
PC10380_c0_g1	11.4675	-0.563031	0.410776	-1.37065	0.170483	0.326353
PC10380_c0_g2	435.235	0.14129	0.287551	0.491357	0.623174	0.759223
PC10383_c0_g1	26.7448	0.771502	0.408549	1.88839	0.0589732	0.156624
PC10383_c1_g2	18.7008	-0.610466	0.579838	-1.05282	0.292423	0.467606
PC18645_c0_g2	4.34921	-4.32319	0.992334	-4.35659	1.32104e-05	0.00020894
PC10384_c0_g1	11.6317	-0.714241	0.375451	-1.90236	0.0571246	0.152999
PC10385_c0_g1	11.2424	-0.303648	0.337135	-0.900671	0.367763	0.542633
PC36069_c0_g1	8.01097	-4.30398	0.942788	-4.56516	4.99106e-06	9.41083e-05
PC6225_c2_g1	751.164	-4.28725	0.279624	-15.3322	4.66105e-53	7.50649e-50
PC10390_c0_g1	36.1428	0.170018	0.397654	0.427554	0.668976	0.793657
PC31644_c0_g1	12.7713	-4.28096	0.773429	-5.53504	3.11164e-08	1.2565e-06
PC10392_c0_g1	5.23744	-0.873444	0.529121	-1.65074	0.0987907	0.224922
PC49582_c0_g1	6.6587	-4.27688	0.896821	-4.76894	1.85202e-06	4.13241e-05
PC10392_c1_g2	6.17072	0.738459	0.444172	1.66255	0.0964017	0.221167
PC10394_c0_g1	18.5665	-0.509295	0.314768	-1.618	0.105663	0.235266
PC10396_c0_g1	47.6474	0.20222	0.367621	0.550077	0.582267	0.728878
PC5086_c0_g2	6.41205	-4.27651	1.3784	-3.10251	0.00191887	0.0117082
PC10397_c0_g1	11.7802	0.660377	0.389321	1.69623	0.089843	0.210575
PC26993_c0_g1	5.86457	-4.27375	0.902028	-4.73794	2.15907e-06	4.69507e-05
PC25724_c0_g1	2.37801	-4.26904	1.17208	-3.64226	0.00027025	0.00244349
PC104_c0_g2	286.213	0.370519	0.1953	1.89717	0.057805	0.154338
PC1040_c0_g1	455.787	0.0785884	0.143951	0.545937	0.585109	0.731299
PC10402_c0_g1	13.6074	0.0343715	0.488524	0.0703578	0.943909	0.968979
PC10403_c0_g1	21.1194	0.420102	0.379988	1.10557	0.268914	0.442696
PC10404_c0_g1	23.9868	-0.28616	0.345479	-0.828298	0.407502	0.580588
PC1041_c0_g1	628.956	0.141747	0.088535	1.60103	0.10937	0.240837
PC58930_c0_g1	12.3808	-4.26794	0.682308	-6.25516	3.97108e-10	2.55212e-08
PC10416_c0_g1	120.929	-0.0397601	0.20198	-0.196852	0.843943	0.91164
PC1042_c0_g1	180.633	0.466463	0.260918	1.78777	0.0738124	0.183863
PC10423_c0_g1	47.6481	-0.392029	0.187841	-2.08702	0.036886	0.11155
PC10423_c0_g2	17.7019	-0.242088	0.339296	-0.713503	0.475535	0.640369
PC10424_c0_g1	11.1638	-0.610445	0.379316	-1.60933	0.107544	0.238004
PC10425_c0_g1	504.778	0.274379	0.12885	2.12944	0.0332176	0.103603
PC13486_c0_g2	9.57814	-4.26499	0.764108	-5.58166	2.3824e-08	1.00656e-06
PC10427_c1_g1	55.8589	0.323736	0.421739	0.767621	0.442712	0.611591
PC10427_c1_g3	4.0814	-1.20796	0.619986	-1.94837	0.0513703	0.141976
PC10428_c0_g1	12879.2	0.00575784	0.438218	0.0131392	0.989517	0.994274
PC1043_c0_g1	539.264	0.115587	0.109561	1.055	0.291426	0.466593
PC1043_c1_g1	90.9564	0.198009	0.452938	0.437166	0.661991	0.788788
PC1043_c2_g1	839.328	-0.0165248	0.188523	-0.0876544	0.930151	0.961512
PC27485_c0_g2	8.61477	-4.25381	0.922548	-4.61094	4.00852e-06	7.86705e-05
PC25622_c0_g2	6.33765	-4.24866	0.889417	-4.77691	1.78011e-06	3.99802e-05
PC10431_c0_g1	4799.91	0.0855057	0.0994482	0.859801	0.389899	0.564408
PC10434_c0_g1	58.3949	-0.369435	0.174389	-2.11846	0.0341365	0.105603
PC44261_c0_g1	3.66706	-4.24193	1.05219	-4.03153	5.54138e-05	0.000673293
PC12872_c0_g1	3.90145	-4.2373	1.14936	-3.68666	0.000227218	0.00212822
PC10438_c0_g1	46.8836	0.70832	0.402758	1.75868	0.0786327	0.192386
PC17740_c0_g1	5.18188	-4.2215	0.94268	-4.47819	7.52793e-06	0.000131357
PC10438_c1_g2	40.3228	0.11765	0.177047	0.664511	0.506363	0.666693
PC856_c0_g1	212.14	-4.21902	0.274093	-15.3926	1.83406e-53	3.13831e-50
PC10439_c0_g1	27.9167	0.25104	0.296099	0.847825	0.396536	0.570456
PC10439_c1_g2	3.9983	0.00490278	0.574886	0.00852827	0.993196	0.996241
PC1044_c0_g1	1013.08	0.181786	0.20469	0.888108	0.374483	0.549101
PC14097_c0_g3	9.01069	-4.21295	0.911934	-4.6198	3.84115e-06	7.59044e-05
PC7518_c0_g1	10.5816	-4.20211	1.21844	-3.44876	0.00056317	0.00440541
PC10441_c0_g1	10.5938	-0.0266176	0.976063	-0.0272704	0.978244	0.988133
PC10441_c0_g2	10.2541	-0.237069	1.06262	-0.223098	0.823459	0.899054
PC18751_c0_g1	5.48735	-4.20143	0.985044	-4.26522	1.99708e-05	0.000293642
PC10444_c0_g1	7.14034	0.767446	0.555093	1.38255	0.166802	0.321463
PC10445_c0_g1	120.029	0.44801	0.327443	1.36821	0.171246	0.327283
PC10445_c1_g1	1311.5	0.432082	0.242591	1.78112	0.0748935	0.185795
PC2888_c0_g1	4625.82	-4.19952	0.297498	-14.1161	3.02197e-45	3.30942e-42
PC10447_c0_g1	113.327	0.434163	0.334005	1.29987	0.193645	0.356005
PC10448_c0_g1	22.3901	0.70572	0.435677	1.61982	0.105271	0.234649
PC10449_c0_g1	35.2994	0.410312	0.273254	1.50158	0.133207	0.27599
PC11613_c2_g1	5.04255	-4.19189	0.898888	-4.66342	3.11002e-06	6.38277e-05
PC10451_c0_g1	4.91253	-0.0497228	0.631456	-0.078743	0.937237	0.966389
PC4343_c0_g2	4.12744	-4.1849	0.929755	-4.50108	6.76101e-06	0.000121061
PC10454_c0_g1	8.37441	0.300095	0.615485	0.487575	0.625851	0.761411
PC10455_c0_g1	20.2441	0.455528	0.335588	1.3574	0.174653	0.33147
PC10456_c0_g1	688.411	0.212066	0.415647	0.510208	0.609906	0.749933
PC22478_c1_g2	14.3064	-4.18472	0.698562	-5.99048	2.09224e-09	1.15487e-07
PC1046_c0_g1	172.505	0.0145432	0.242843	0.0598871	0.952246	0.97369
PC1046_c1_g1	5.42045	-0.0602255	0.484645	-0.124267	0.901104	0.94481
PC27068_c1_g1	3.76675	-4.17895	1.02157	-4.0907	4.30078e-05	0.00054715
PC10461_c0_g1	1894.76	0.220625	0.342261	0.64461	0.51918	0.677896
PC10461_c0_g2	1276.87	0.0962643	0.362286	0.265714	0.79046	0.877655
PC10462_c0_g2	15.1385	0.483567	0.373791	1.29368	0.195775	0.358645
PC33129_c0_g1	2.75333	-4.17875	1.01708	-4.10856	3.98135e-05	0.000514642
PC10462_c2_g1	4.41545	-1.29036	0.751034	-1.71811	0.085776	0.204065
PC10462_c5_g1	6.25574	-0.787845	0.678014	-1.16199	0.245239	0.416357
PC10463_c0_g1	136.29	0.415862	0.241221	1.72399	0.0847095	0.202195
PC38325_c0_g1	23.6614	-4.16627	0.597986	-6.96717	3.2338e-12	3.29127e-10
PC10464_c0_g1	22.2604	-0.162702	0.335667	-0.484713	0.62788	0.762987
PC6763_c3_g1	8.05161	-4.16367	0.906628	-4.59248	4.38001e-06	8.45669e-05
PC10467_c1_g1	11.3769	-1.41435	0.673409	-2.10029	0.0357034	0.109034
PC10467_c2_g1	12.9066	-0.633883	0.511918	-1.23825	0.215623	0.382853
PC2081_c2_g1	6.36147	-4.16087	0.86287	-4.82213	1.42036e-06	3.31513e-05
PC1047_c0_g1	131.712	-0.258518	0.225632	-1.14575	0.251898	0.42372
PC29304_c0_g1	3.69553	-4.15681	1.02634	-4.05012	5.11913e-05	0.000632121
PC10471_c0_g1	50.425	-0.070041	0.324438	-0.215884	0.829078	0.902518
PC10472_c0_g1	18.3228	-0.389066	0.441247	-0.881741	0.377917	0.55232
PC22404_c1_g1	3.10382	-4.15632	1.13249	-3.67006	0.000242489	0.00223983
PC10472_c2_g2	3.23998	-0.277636	1.06696	-0.260214	0.794699	0.88018
PC10473_c0_g1	22.8748	0.0324197	0.305472	0.10613	0.915479	0.953271
PC10474_c0_g1	22.1318	0.237821	0.489417	0.485927	0.627019	0.762333
PC10475_c0_g1	42.7037	-0.296269	0.268193	-1.10469	0.269295	0.443011
PC10475_c0_g2	16.0813	-0.457351	0.376866	-1.21356	0.224914	0.393564
PC10475_c2_g1	9.70659	-0.885721	0.459465	-1.92772	0.0538899	0.147069
PC10477_c0_g1	289.101	1.70408	0.826951	2.06068	0.0393337	0.116976
PC48392_c2_g1	3.98043	-4.15061	1.32618	-3.12974	0.00174958	0.0108938
PC45795_c0_g1	9.91923	-4.14683	1.10286	-3.76008	0.000169859	0.00167522
PC1048_c0_g2	128.306	-0.23864	0.15837	-1.50686	0.131848	0.274295
PC1048_c1_g2	342.401	-0.404586	0.325392	-1.24338	0.213729	0.380707
PC1048_c2_g1	97.5866	-0.198157	0.35267	-0.561876	0.5742	0.722659
PC1048_c4_g1	8.98177	-0.0811214	0.409363	-0.198165	0.842916	0.91098
PC19990_c1_g2	3.80372	-4.13796	0.962301	-4.30007	1.70745e-05	0.000257699
PC10789_c0_g3	5.34403	-4.1302	1.05877	-3.90093	9.58228e-05	0.0010519
PC10481_c1_g1	9.02453	-0.683463	0.484975	-1.40927	0.158754	0.310433
PC6663_c2_g2	3.01597	-4.12566	0.966359	-4.26928	1.96101e-05	0.000288958
PC10487_c2_g1	248.957	-0.364835	0.186432	-1.95693	0.0503552	0.140003
PC10488_c1_g1	20.2159	-0.348087	0.418403	-0.831942	0.405442	0.578616
PC10488_c1_g2	11.7767	0.146039	0.457858	0.318961	0.749756	0.848781
PC1049_c0_g1	479.564	-0.0320998	0.113383	-0.28311	0.777092	0.868327
PC104936_c0_g1	1412.25	1.40482	1.01123	1.38921	0.164768	0.318958
PC104937_c0_g1	593.74	0.0284403	0.369681	0.076932	0.938678	0.966932
PC8055_c0_g1	4.12732	-4.12485	0.974042	-4.23477	2.28784e-05	0.000327767
PC104942_c0_g1	12.3887	-0.193111	0.648055	-0.297985	0.765715	0.859713
PC104943_c0_g1	27.293	0.697822	0.364884	1.91245	0.0558188	0.150533
PC104947_c0_g1	1398.58	1.45685	0.991715	1.46902	0.141826	0.28864
PC104948_c0_g1	134.632	0.204586	0.121669	1.68149	0.0926671	0.215038
PC104950_c0_g1	4.34064	-1.9007	1.05566	-1.80048	0.0717852	0.180556
PC10341_c0_g1	7.49174	-4.12033	0.890864	-4.62509	3.74434e-06	7.42844e-05
PC10496_c0_g1	18.8123	0.451043	0.3398	1.32738	0.184384	0.344308
PC62698_c0_g3	3.81368	-4.12014	1.0204	-4.03776	5.39633e-05	0.000658381
PC11258_c0_g3	6.72664	-4.11887	0.88955	-4.63028	3.65163e-06	7.30273e-05
PC104979_c0_g1	9.13823	0.12745	0.46314	0.275187	0.783172	0.872536
PC58_c2_g1	15.2937	-4.11721	0.642038	-6.41272	1.42947e-10	1.0245e-08
PC104982_c0_g1	14.1716	-0.179885	0.617145	-0.291479	0.770685	0.863401
PC104985_c0_g1	58.048	1.70924	1.11875	1.52781	0.126559	0.266555
PC105994_c0_g1	2.94735	-4.11543	1.35862	-3.02911	0.00245273	0.014197
PC28710_c0_g1	20.9532	-4.11335	0.750116	-5.48362	4.16714e-08	1.61369e-06
PC105_c0_g1	3914.39	0.299607	0.376139	0.796533	0.425722	0.597102
PC105_c0_g2	827.74	0.115139	0.442288	0.260326	0.794612	0.88018
PC1050_c0_g1	1592.17	0.218957	0.182776	1.19795	0.230936	0.400516
PC10500_c0_g1	28.6084	0.875619	0.614487	1.42496	0.154169	0.304556
PC105001_c0_g1	70.0879	-1.9464	1.57888	-1.23277	0.217661	0.38525
PC105023_c0_g1	16.5579	-0.750844	0.57687	-1.30158	0.193059	0.355381
PC10503_c0_g1	24.0864	-0.128722	0.626479	-0.205469	0.837206	0.907725
PC12546_c0_g1	7.39472	-4.11023	1.04179	-3.94536	7.96812e-05	0.000905943
PC10503_c1_g1	24.5932	0.0933396	0.259222	0.360077	0.71879	0.828695
PC10503_c1_g2	27.2384	0.220993	0.241055	0.916771	0.359263	0.534734
PC10503_c2_g1	28.3493	-0.0633791	0.90598	-0.0699564	0.944228	0.969052
PC105031_c0_g1	11.7648	-2.04633	0.997223	-2.05203	0.0401672	0.118809
PC105032_c0_g1	21.2214	1.18813	1.0921	1.08793	0.276624	0.450906
PC105033_c0_g1	246.052	1.61361	0.834654	1.93327	0.0532026	0.145614
PC105034_c0_g1	567.155	1.34601	0.846804	1.58952	0.111943	0.244615
PC105036_c0_g1	46.8141	0.381741	0.430693	0.88634	0.375434	0.549777
PC105043_c0_g1	375.187	1.36523	0.797198	1.71253	0.0867988	0.205731
PC105049_c0_g1	18.4665	-0.32589	0.750369	-0.434307	0.664066	0.790057
PC25018_c0_g1	5.8393	-4.10787	0.925354	-4.43925	9.02739e-06	0.000153035
PC7956_c0_g1	56.6199	-4.10601	0.433985	-9.46118	3.04481e-21	1.11148e-18
PC105079_c0_g1	19.6789	-0.211601	0.238173	-0.888433	0.374308	0.548891
PC21820_c0_g2	5.80537	-4.09576	0.945791	-4.33052	1.48761e-05	0.000230622
PC105089_c0_g1	96.6574	0.188883	0.348627	0.54179	0.587963	0.733764
PC1051_c0_g1	449.232	-0.0383989	0.171149	-0.224359	0.822478	0.898448
PC105104_c0_g1	115.663	0.281932	0.187056	1.50721	0.131757	0.274149
PC157_c0_g1	784.108	-4.09132	0.239896	-17.0546	3.23194e-65	1.26406e-61
PC105111_c0_g1	445.351	1.22387	0.913814	1.3393	0.180472	0.338887
PC10512_c0_g1	43.6695	-0.226637	0.260779	-0.869077	0.384805	0.559375
PC10512_c1_g1	25.8941	-0.49714	0.482657	-1.03001	0.303007	0.478719
PC27703_c0_g1	5.78807	-4.0893	0.942835	-4.33724	1.44282e-05	0.000225595
PC6676_c3_g1	4.58195	-4.08707	1.047	-3.90359	9.47769e-05	0.00104251
PC10514_c0_g2	66.9616	-0.428036	0.335678	-1.27514	0.202261	0.366528
PC10514_c0_g3	23.5295	-0.601609	0.3228	-1.86372	0.0623613	0.163147
PC10514_c0_g4	7.28563	-0.25547	0.798114	-0.320093	0.748898	0.848367
PC105141_c0_g1	183.874	-1.76473	1.46224	-1.20687	0.227483	0.396437
PC105144_c0_g1	81.4474	1.47133	0.742424	1.98179	0.0475031	0.134451
PC1154_c0_g1	3338.87	-4.08095	0.319304	-12.7808	2.09977e-37	1.85443e-34
PC10515_c0_g3	13.9457	-0.649628	0.306805	-2.1174	0.034226	0.105773
PC118920_c0_g1	4.25023	-4.07705	0.940446	-4.33523	1.45609e-05	0.000227021
PC3617_c1_g1	6.41432	-4.07387	0.907503	-4.4891	7.1524e-06	0.000126231
PC16487_c0_g1	20.8745	-4.06549	0.611042	-6.65337	2.86457e-11	2.39104e-09
PC10516_c0_g3	12.2772	-0.191488	0.420925	-0.454922	0.649165	0.779354
PC10516_c1_g1	15.6695	-0.459864	0.347519	-1.32328	0.185744	0.34615
PC11578_c0_g2	4.42711	-4.05889	0.948079	-4.28117	1.85913e-05	0.000276176
PC3621_c0_g1	136.065	-4.04769	0.509068	-7.95118	1.84739e-15	2.92357e-13
PC105176_c0_g1	3.90093	-1.08269	0.808205	-1.33962	0.180367	0.338861
PC10518_c0_g1	616.451	0.00305516	0.333898	0.00914998	0.992699	0.996113
PC105184_c0_g1	3743.04	0.0155103	0.146999	0.105513	0.915968	0.953476
PC71904_c0_g1	4.62578	-4.04618	0.901925	-4.48616	7.25184e-06	0.000127351
PC8305_c0_g2	4.02906	-4.03356	0.947429	-4.25738	2.06839e-05	0.000302018
PC1052_c0_g2	22.7612	0.422786	0.291113	1.45231	0.146417	0.294749
PC105209_c0_g1	5.55687	-0.942155	0.590501	-1.59552	0.110597	0.242558
PC10521_c0_g1	30.2427	0.352647	0.255302	1.38129	0.167188	0.322072
PC10521_c0_g2	25.1555	-0.418375	0.289944	-1.44295	0.149034	0.29796
PC10521_c1_g1	7.44664	0.120071	0.488975	0.245556	0.806026	0.887452
PC105210_c0_g1	510.184	1.05443	1.00225	1.05206	0.292772	0.468004
PC20470_c0_g1	7.89638	-4.0246	0.87457	-4.60181	4.18832e-06	8.14981e-05
PC10522_c0_g2	91.8999	1.07271	0.78034	1.37467	0.169235	0.324825
PC10522_c1_g2	5.11024	-0.190808	0.506001	-0.377091	0.706106	0.819907
PC105227_c0_g1	334.088	0.257535	0.168261	1.53057	0.125877	0.265382
PC21532_c1_g2	4.67616	-4.01421	0.906789	-4.42684	9.56228e-06	0.000161006
PC105240_c0_g1	349.436	1.41277	0.806515	1.7517	0.079825	0.194476
PC10525_c0_g2	72.7478	0.199583	0.230433	0.866119	0.386425	0.560773
PC10525_c1_g1	16.0229	0.171285	0.476069	0.35979	0.719004	0.828768
PC13787_c0_g2	3.0175	-4.01373	1.12729	-3.5605	0.000370146	0.00313839
PC105252_c0_g1	8.15751	0.55607	0.673518	0.82562	0.40902	0.581812
PC6988_c1_g6	6.59394	-4.00281	0.95613	-4.18647	2.83328e-05	0.000388431
PC48408_c1_g2	4.21974	-4.00235	1.17928	-3.39388	0.000689094	0.00518297
PC13624_c2_g1	4.43853	-4.00121	0.912676	-4.38404	1.16497e-05	0.000189397
PC10528_c1_g1	80.5315	0.706461	0.625746	1.12899	0.258902	0.432025
PC14978_c0_g3	4.70934	-3.99159	0.931556	-4.28487	1.82849e-05	0.000272659
PC36976_c0_g1	5.22679	-3.98401	0.942871	-4.2254	2.38512e-05	0.000339396
PC1053_c0_g2	282.565	-0.32215	0.176743	-1.8227	0.0683482	0.174296
PC1053_c0_g3	16.4946	-0.408745	0.281755	-1.45071	0.146861	0.29545
PC1053_c1_g1	14.8331	0.608391	0.303832	2.00239	0.0452427	0.129756
PC1053_c1_g2	1807.99	0.189597	0.124536	1.52242	0.127903	0.268785
PC1053_c1_g3	29.757	-0.126373	0.353512	-0.357479	0.720733	0.830059
PC1053_c2_g1	404.371	-0.221181	0.133926	-1.65151	0.0986345	0.224674
PC1053_c3_g1	155.521	-0.277782	0.259782	-1.06929	0.28494	0.459618
PC1053_c3_g2	41.1123	0.712976	0.332298	2.1456	0.0319053	0.10075
PC44594_c1_g2	6.2215	-3.98212	0.895184	-4.44838	8.65185e-06	0.000147399
PC10531_c0_g1	505.048	0.361376	0.214694	1.68322	0.0923329	0.214519
PC7409_c0_g1	67.5337	-3.9808	0.43736	-9.10189	8.87744e-20	2.73086e-17
PC10533_c0_g1	1653.69	-0.0196825	0.304849	-0.0645648	0.94852	0.971226
PC14880_c0_g5	5.9908	-3.98043	1.01762	-3.91152	9.17167e-05	0.00101661
PC10534_c0_g2	33.4652	-0.623726	0.399939	-1.55955	0.118866	0.255069
PC105365_c0_g1	125.515	0.223934	0.148272	1.51029	0.130969	0.273215
PC105369_c0_g1	8.36813	-0.970823	0.55715	-1.74248	0.0814245	0.197064
PC10537_c0_g1	2186.13	0.0414031	0.370925	0.111621	0.911124	0.950493
PC10538_c0_g1	41.738	0.952773	0.538714	1.7686	0.0769599	0.18936
PC10538_c0_g2	5.61059	0.916471	0.511077	1.79322	0.0729384	0.182533
PC10538_c0_g5	7.74825	0.0405231	0.451456	0.0897608	0.928477	0.960548
PC10538_c0_g6	69.5716	0.653749	0.623133	1.04913	0.294117	0.469634
PC105387_c0_g1	8.5964	0.0103813	0.510922	0.0203187	0.983789	0.99143
PC1054_c0_g1	13789.7	0.182141	0.250594	0.726838	0.467325	0.632698
PC10540_c0_g1	13.7409	0.07612	0.333989	0.227912	0.819715	0.896256
PC10540_c1_g1	9.98977	-0.327644	0.341925	-0.958233	0.337945	0.514714
PC10540_c3_g1	11.2411	-0.881037	0.581747	-1.51447	0.129907	0.271662
PC10541_c0_g1	2131.95	0.204112	0.126849	1.60909	0.107596	0.23806
PC10541_c1_g1	23.2956	-0.81291	0.493696	-1.64658	0.0996446	0.226246
PC14971_c2_g1	4.38868	-3.96784	0.927757	-4.27681	1.89594e-05	0.000280883
PC10542_c0_g2	28.9323	-0.00971046	0.364556	-0.0266364	0.97875	0.988334
PC10542_c1_g4	7.74129	-0.546809	0.774707	-0.705827	0.480296	0.644208
PC23699_c0_g2	13.1134	-3.96651	0.780067	-5.08484	3.67939e-07	1.05041e-05
PC24751_c1_g1	4.11994	-3.96613	0.949893	-4.17534	2.97538e-05	0.000405714
PC10545_c0_g3	65.3304	-0.347908	0.382347	-0.909927	0.362861	0.538188
PC10545_c1_g1	7.77602	0.449847	0.401335	1.12088	0.26234	0.435635
PC9705_c0_g2	8.56913	-3.96478	0.921612	-4.302	1.69261e-05	0.000256165
PC10546_c2_g1	48.2672	-0.813245	0.462597	-1.758	0.0787476	0.192582
PC3654_c2_g1	15.9767	-3.95775	0.694244	-5.7008	1.19245e-08	5.51467e-07
PC157_c1_g2	242.867	-3.95663	0.250751	-15.7791	4.33477e-56	8.47696e-53
PC31181_c0_g2	4.88592	-3.95271	1.06045	-3.72739	0.00019347	0.00187035
PC10549_c0_g1	1305.13	0.211682	0.430748	0.49143	0.623122	0.759194
PC10549_c0_g2	264.825	-0.519505	0.339008	-1.53242	0.125418	0.2647
PC10549_c0_g3	5.22381	0.473969	0.505674	0.937301	0.348604	0.524688
PC10310_c0_g1	20.43	-3.95133	0.684994	-5.76842	8.00171e-09	3.85688e-07
PC105496_c0_g1	168.794	-0.0829548	0.167893	-0.494094	0.62124	0.757996
PC1055_c0_g1	98.9028	0.253649	0.223798	1.13338	0.257053	0.429891
PC16787_c0_g3	4.17578	-3.95092	0.972874	-4.06108	4.88464e-05	0.000608424
PC1055_c0_g3	72.2624	-0.535094	0.263554	-2.0303	0.0423262	0.123605
PC1055_c0_g4	164.624	0.059179	0.173034	0.342008	0.732345	0.838076
PC10550_c0_g1	23.8061	-0.381611	0.36652	-1.04117	0.297795	0.473298
PC10550_c0_g2	7.74018	0.0368347	0.726313	0.0507146	0.959553	0.97773
PC10550_c1_g1	128.207	0.756799	0.766882	0.986852	0.323715	0.500151
PC105500_c0_g1	22.8347	-0.482319	0.329528	-1.46367	0.143285	0.290582
PC105507_c0_g1	3.97815	1.69184	0.802358	2.10859	0.0349804	0.107403
PC10551_c0_g1	1583.2	0.12667	0.162224	0.780838	0.434898	0.60492
PC10553_c0_g1	81.2796	0.338112	0.207737	1.6276	0.10361	0.232187
PC105531_c0_g1	16.4929	-0.706999	0.671089	-1.05351	0.292107	0.467269
PC12815_c0_g4	4.41404	-3.94907	0.952121	-4.14766	3.35892e-05	0.000447932
PC105545_c0_g1	3.89051	1.56184	0.846871	1.84425	0.0651469	0.168185
PC29961_c0_g1	70.4685	-3.94607	0.447678	-8.81455	1.2017e-18	3.25743e-16
PC10555_c0_g1	573.472	0.920189	0.439675	2.09289	0.0363594	0.110409
PC28657_c0_g1	6.24662	-3.94358	0.920871	-4.28245	1.84846e-05	0.000275039
PC10557_c0_g1	1133.94	0.0266962	0.133657	0.199737	0.841686	0.91035
PC1056_c0_g1	549.112	0.0909112	0.156765	0.57992	0.561969	0.713319
PC1056_c1_g1	214.44	-0.00166392	0.181905	-0.00914718	0.992702	0.996113
PC1056_c2_g1	201.331	0.184884	0.163137	1.13331	0.257084	0.429907
PC1056_c3_g1	17.0129	0.509888	0.315696	1.61513	0.106284	0.236169
PC10560_c0_g1	10.9741	0.0962638	0.45103	0.213431	0.830991	0.903744
PC25004_c1_g1	6.58817	-3.93525	0.966656	-4.07099	4.6814e-05	0.00058631
PC10561_c0_g1	5.19819	0.242481	0.676497	0.358436	0.720017	0.829537
PC22313_c0_g1	10.3701	-3.92055	0.714256	-5.489	4.04218e-08	1.57421e-06
PC10562_c1_g1	7.94669	0.16953	0.509405	0.332801	0.739285	0.842262
PC10562_c1_g3	32.4519	-0.0365135	0.501071	-0.072871	0.941909	0.968402
PC561_c2_g1	5.3155	-3.92036	0.972442	-4.03146	5.54315e-05	0.000673293
PC11834_c0_g1	678.274	-3.91931	0.157223	-24.9283	3.6726e-137	5.02742e-133
PC23350_c0_g1	6.67197	-3.9133	0.934382	-4.18812	2.81281e-05	0.000386174
PC18400_c0_g2	8.42701	-3.91213	0.809002	-4.83575	1.32645e-06	3.13795e-05
PC19373_c0_g4	5.35231	-3.90946	0.977205	-4.00066	6.31662e-05	0.000747672
PC10564_c1_g1	44.6801	-0.356503	0.475868	-0.749163	0.453759	0.621835
PC10565_c0_g1	15.2789	-0.612393	0.490671	-1.24807	0.212005	0.378449
PC10565_c2_g1	9.13054	0.616374	0.374922	1.64401	0.100175	0.227039
PC1812_c0_g1	846.361	-3.90668	0.36802	-10.6154	2.5272e-26	1.47212e-23
PC10566_c0_g2	2.93167	-2.2245	1.05945	-2.09968	0.0357572	0.109137
PC39898_c1_g2	4.5768	-3.90409	1.06392	-3.66951	0.000243013	0.00224391
PC10567_c0_g1	58.0546	-0.106892	0.255232	-0.418801	0.675361	0.798258
PC5479_c0_g2	5.0525	-3.9024	1.15919	-3.36648	0.000761345	0.00560476
PC32111_c1_g1	6.41603	-3.8973	0.947572	-4.11294	3.90659e-05	0.00050918
PC10569_c0_g1	77.8913	-0.190605	0.388219	-0.490974	0.623445	0.759423
PC1057_c0_g1	813.573	0.0106071	0.0887679	0.119493	0.904885	0.946437
PC10570_c0_g1	1195.91	0.0425613	0.104633	0.406766	0.68418	0.804306
PC10571_c0_g1	26.2723	0.0506701	0.235771	0.214912	0.829836	0.902887
PC9718_c0_g3	17.8152	-3.89394	0.566203	-6.87728	6.10044e-12	5.90169e-10
PC10572_c0_g2	5.71055	-0.456746	0.488484	-0.935028	0.349774	0.526102
PC105720_c0_g1	24.9064	-0.269431	0.693459	-0.388532	0.697622	0.813992
PC105726_c0_g1	10.8166	-0.941712	0.452938	-2.07912	0.0376064	0.113104
PC105737_c0_g1	59.6152	1.34561	0.789018	1.70542	0.0881152	0.207779
PC10574_c0_g2	8.41084	0.623476	0.367079	1.69848	0.0894178	0.209895
PC10574_c0_g4	6.34734	0.122678	0.534283	0.229613	0.818392	0.895585
PC105744_c0_g1	10.5932	-0.425434	0.388332	-1.09554	0.27328	0.447293
PC11166_c1_g2	4.12739	-3.89128	1.05675	-3.6823	0.000231135	0.00215532
PC105758_c0_g1	15.4577	0.0102296	0.350392	0.0291949	0.976709	0.987129
PC105760_c0_g1	359.736	1.74261	0.885511	1.96791	0.0490781	0.137305
PC105768_c0_g1	10	0.767909	0.439847	1.74586	0.080836	0.196022
PC48354_c0_g1	2.34697	-3.88759	1.31735	-2.95107	0.00316679	0.0173505
PC5124_c3_g1	3.73252	-3.88391	0.997029	-3.89548	9.80054e-05	0.00107113
PC19096_c0_g1	72.1277	-3.88369	0.353759	-10.9783	4.85808e-28	3.24401e-25
PC10579_c0_g1	214.729	0.408573	0.252382	1.61886	0.105476	0.234966
PC16190_c0_g2	4.78794	-3.8719	0.932055	-4.15415	3.26498e-05	0.000437536
PC18202_c0_g1	5.30303	-3.87047	1.18215	-3.2741	0.00105998	0.00729147
PC1597_c0_g5	5.93258	-3.8694	1.01514	-3.81169	0.000138017	0.00141257
PC10584_c0_g1	87.9233	0.244017	0.148423	1.64406	0.100164	0.227039
PC10585_c0_g1	7.52286	-0.36725	0.434537	-0.845152	0.398026	0.571879
PC10586_c1_g2	6.21101	-0.783483	0.454967	-1.72207	0.0850576	0.202796
PC105866_c0_g1	37.4938	0.441927	0.262685	1.68234	0.0925025	0.214819
PC105869_c0_g1	8.59783	-0.984258	0.469131	-2.09805	0.0359011	0.109418
PC9429_c0_g1	3.63956	-3.86696	0.984934	-3.92611	8.6329e-05	0.00096786
PC105873_c0_g1	6.55663	0.888376	0.596514	1.48928	0.136413	0.280891
PC10588_c0_g1	4932.66	-0.0534542	0.307533	-0.173816	0.86201	0.922456
PC10588_c0_g2	71.1119	-0.17993	0.46085	-0.390431	0.696218	0.813081
PC10588_c0_g3	20.7025	-0.346345	0.452088	-0.766101	0.443616	0.612362
PC16245_c0_g1	9.63315	-3.85423	0.909191	-4.23919	2.24331e-05	0.00032325
PC10588_c1_g1	6.20612	-0.460625	0.462909	-0.995066	0.319704	0.495885
PC14898_c3_g1	5.14845	-3.85026	0.910704	-4.22778	2.36007e-05	0.000336706
PC1059_c0_g1	15.1861	-0.103941	0.424744	-0.244715	0.806677	0.88777
PC61862_c0_g1	8.53932	-3.84958	0.766367	-5.02316	5.0828e-07	1.37779e-05
PC34930_c0_g2	5.14763	-3.84808	0.925871	-4.15617	3.23624e-05	0.00043472
PC10592_c0_g1	19.2465	-0.998152	0.585726	-1.70413	0.088357	0.208179
PC10592_c1_g1	7.83493	-0.902699	0.46854	-1.92662	0.0540271	0.147242
PC105922_c0_g1	99.6513	-1.66737	1.32416	-1.25919
PC10593_c0_g1	12.9843	0.0251195	0.430507	0.0583486	0.953471	0.974523
PC105939_c0_g1	35.1428	0.736315	0.621181	1.18535	0.23588	0.40598
PC10595_c0_g1	548.271	0.232218	0.153301	1.51479	0.129826	0.271591
PC10595_c0_g2	29.5472	-0.37849	0.228336	-1.6576	0.0973976	0.222769
PC105952_c0_g1	25.298	-0.34498	0.373762	-0.922994	0.35601	0.53183
PC516_c1_g2	5.81621	-3.84694	0.912534	-4.21567	2.49041e-05	0.000352
PC12275_c0_g3	4.28976	-3.83437	1.55818	-2.4608	0.0138628	0.0545779
PC31885_c0_g1	3.46071	-3.83192	1.0109	-3.79061	0.000150277	0.00151539
PC105989_c0_g1	11.2039	-0.636233	0.742094	-0.857347	0.391253	0.56577
PC20026_c0_g1	3.60441	-3.82871	0.972813	-3.93571	8.29515e-05	0.0009369
PC106_c0_g1	1897.61	0.070477	0.0787607	0.894824	0.370881	0.545527
PC8522_c0_g1	3.2234	-3.82209	1.01554	-3.76359	0.000167491	0.00165663
PC1060_c0_g2	141.396	-0.45699	0.248802	-1.83676	0.066245	0.170232
PC106005_c0_g1	11.8264	-0.56112	0.348501	-1.6101	0.107377	0.237711
PC106010_c0_g1	57.1917	-0.721993	0.348827	-2.06977	0.0384735	0.11503
PC106014_c0_g1	501.318	1.33867	0.879988	1.52123	0.128201	0.269205
PC10602_c0_g1	9.32517	-0.237452	0.508956	-0.466547	0.640824	0.772578
PC10603_c0_g3	6.62079	0.33394	0.561506	0.594722	0.55203	0.705339
PC32634_c1_g1	3.59958	-3.81842	1.28017	-2.98274	0.00285678	0.0159716
PC106035_c0_g1	8.53294	0.191701	0.677184	0.283085	0.777112	0.868327
PC106045_c0_g1	353.162	1.50993	1.02231	1.47698	0.139681	0.285408
PC18174_c0_g1	4.36383	-3.81593	1.00348	-3.8027	0.000143125	0.00145506
PC10605_c0_g2	13.6286	-0.981176	0.501519	-1.95641	0.0504173	0.140108
PC10605_c0_g3	5.83598	-0.950276	0.696102	-1.36514	0.17221	0.328554
PC13802_c1_g1	11.9276	-3.81215	0.687767	-5.54279	2.97698e-08	1.21651e-06
PC39520_c0_g1	4.65265	-3.81162	0.971263	-3.9244	8.69478e-05	0.000973203
PC106061_c0_g1	4.97448	-0.480251	0.911581	-0.526834	0.598309	0.741782
PC106069_c0_g1	6.81243	-0.372765	0.564124	-0.660786	0.50875	0.668517
PC10607_c0_g1	62.2378	-0.0601089	0.223928	-0.26843	0.788369	0.876363
PC10608_c0_g1	75.9378	0.513721	0.565363	0.908656	0.363532	0.538891
PC3149_c0_g4	6.09278	-3.80906	0.932222	-4.086	4.38867e-05	0.000556522
PC10609_c0_g1	5.59821	-0.383181	0.531006	-0.721612	0.470533	0.63547
PC13509_c0_g1	2.44885	-3.80384	1.4384	-2.64449	0.00818141	0.0366537
PC1061_c0_g2	34.3318	-0.252771	0.288605	-0.875838	0.381118	0.555658
PC1061_c1_g1	99.0875	-0.0857775	0.191361	-0.448249	0.653973	0.783292
PC19238_c0_g1	4.88337	-3.79394	1.09681	-3.45907	0.000542036	0.00427662
PC10610_c0_g1	116.396	1.05411	0.615565	1.71242	0.0868191	0.205735
PC22576_c0_g1	4.52601	-3.7933	0.941802	-4.0277	5.63241e-05	0.000682319
PC10613_c0_g1	6.08479	-0.730563	0.475824	-1.53536	0.124695	0.263621
PC10615_c1_g1	132.416	-0.0256876	0.176564	-0.145486	0.884327	0.935229
PC106153_c0_g1	10.5229	-0.514969	0.622544	-0.827201	0.408123	0.581201
PC10618_c0_g1	17.4548	-2.23502	1.76885	-1.26354	0.206394	0.371779
PC10618_c0_g3	2.38343	-2.07045	1.47396	-1.40468	0.160116	0.312315
PC106180_c0_g1	41.5869	0.652286	0.704055	0.926471	0.354201	0.530024
PC10619_c0_g1	49.1511	-0.469245	0.222617	-2.10785	0.0350436	0.107535
PC22281_c0_g3	4.61475	-3.77778	0.958655	-3.94071	8.12401e-05	0.00092099
PC10620_c0_g1	336.84	0.0199619	0.374798	0.0532602	0.957525	0.976645
PC859_c0_g1	444.254	-3.77745	0.256155	-14.7468	3.22823e-49	4.01738e-46
PC2969_c2_g1	8.03651	-3.77634	0.801726	-4.71026	2.47404e-06	5.26704e-05
PC10893_c0_g1	3.91798	-3.77405	0.953734	-3.95713	7.58543e-05	0.000868202
PC10622_c0_g1	237.019	0.0460596	0.172221	0.267445	0.789126	0.876734
PC10622_c1_g2	8.49716	0.247064	0.47238	0.523019	0.600961	0.743912
PC10623_c2_g1	10.233	-0.783188	0.537729	-1.45647	0.145262	0.29333
PC10624_c0_g2	6.07442	0.0986539	0.488419	0.201986	0.839927	0.90931
PC106241_c0_g1	7.64085	0.114021	0.453047	0.251676	0.801291	0.884088
PC10625_c0_g1	7.54392	-0.112335	0.49081	-0.228876	0.818965	0.895862
PC15632_c1_g1	15.8201	-3.77196	0.59894	-6.29772	3.02054e-10	1.9975e-08
PC106264_c0_g1	412.073	0.181246	0.115004	1.57599	0.115027	0.249088
PC10627_c0_g2	104.455	0.412262	0.353328	1.1668	0.243292	0.414361
PC106273_c0_g1	53.0659	0.743376	0.490036	1.51698	0.129271	0.270911
PC1662_c1_g1	11.2246	-3.77038	0.671246	-5.61698	1.94319e-08	8.43119e-07
PC106282_c0_g1	15.9751	0.233921	0.301646	0.775484	0.438054	0.607627
PC106285_c0_g1	2.73782	-0.325185	0.987709	-0.329231	0.741981	0.843848
PC10629_c0_g1	9.91392	0.0739328	0.558391	0.132403	0.894665	0.940888
PC1063_c0_g1	962.738	0.436765	0.262407	1.66446	0.0960213	0.220561
PC14435_c0_g1	10.5316	-3.76525	0.757758	-4.96894	6.73201e-07	1.73713e-05
PC10631_c0_g2	12.4642	0.126064	0.327027	0.385484	0.699878	0.81572
PC10633_c0_g1	22.5925	-0.338304	0.331166	-1.02155	0.306992	0.483148
PC10633_c0_g2	6.98192	-0.778992	0.497155	-1.5669	0.117138	0.25246
PC21227_c1_g1	3.64846	-3.76306	0.967504	-3.88946	0.000100469	0.00109456
PC10634_c1_g1	18.3838	0.65894	0.41806	1.57619	0.114983	0.249011
PC10635_c1_g2	9.17871	0.482994	1.03766	0.465463	0.6416	0.773139
PC46587_c1_g1	4.0271	-3.76147	0.967164	-3.88917	0.000100586	0.0010954
PC10637_c0_g1	22.8206	-0.0343896	0.260831	-0.131846	0.895106	0.941171
PC10638_c0_g2	3.25308	-1.03229	1.22929	-0.839745	0.401051	0.574598
PC9638_c2_g4	4.61117	-3.75566	0.946181	-3.96929	7.20883e-05	0.000832757
PC106392_c0_g1	13.6083	0.765893	0.370782	2.06562	0.0388645	0.115908
PC106398_c0_g1	350.422	1.52052	0.865219	1.75738	0.0788536	0.192806
PC14564_c2_g2	3.54681	-3.75524	0.978865	-3.83632	0.000124892	0.00130557
PC1064_c0_g2	328.726	0.146446	0.133501	1.09696	0.272659	0.446623
PC12230_c2_g1	5.88057	-3.75327	1.13548	-3.30546	0.000948213	0.00664623
PC1064_c11_g1	26.5217	0.284191	0.226161	1.25659	0.208904	0.374863
PC1064_c2_g1	28.515	-0.313246	0.440948	-0.710392	0.477461	0.641882
PC1064_c28_g1	8.30116	0.176297	0.396688	0.444422	0.656737	0.785125
PC16038_c0_g1	7.69338	-3.75047	1.04991	-3.57217	0.000354032	0.00302897
PC1064_c4_g1	17.1401	0.583779	0.49377	1.18229	0.237091	0.407321
PC25686_c0_g1	3.57972	-3.74934	0.998955	-3.75326	0.000174548	0.00171405
PC37395_c0_g1	6.318	-3.74867	0.822509	-4.55761	5.17387e-06	9.70871e-05
PC23685_c0_g2	5.17118	-3.74734	0.897809	-4.17387	2.99464e-05	0.000407491
PC106408_c0_g1	6.36103	-0.00533591	0.489875	-0.0108924	0.991309	0.995294
PC12136_c0_g1	70.9379	-3.74183	0.37036	-10.1032	5.34501e-24	2.52303e-21
PC10641_c0_g1	10.256	-0.743497	0.375035	-1.98248	0.0474261	0.134258
PC9318_c0_g1	131.39	-3.73046	0.429894	-8.67762	4.04149e-18	1.01512e-15
PC106422_c0_g1	193.56	0.735305	0.419641	1.75222	0.0797354	0.19437
PC82811_c0_g1	7.22408	-3.72517	0.83932	-4.43832	9.06642e-06	0.000153412
PC10647_c0_g1	29.7142	-0.145385	0.280746	-0.517853	0.604561	0.74631
PC9758_c0_g1	4.6903	-3.72514	0.970336	-3.83902	0.000123525	0.00129474
PC10648_c0_g2	4.7297	-1.20506	0.75629	-1.59338	0.111076	0.243282
PC106491_c0_g1	11.7126	-0.512202	0.776742	-0.659423	0.509624	0.669143
PC38091_c0_g1	4.63659	-3.7249	0.997214	-3.73531	0.000187485	0.0018202
PC5001_c0_g1	44.3184	-3.72146	0.3859	-9.64358	5.2329e-22	2.04666e-19
PC18834_c0_g1	5.92183	-3.71667	0.914595	-4.06374	4.82936e-05	0.000602635
PC10652_c0_g1	37.9725	0.338396	0.566344	0.59751	0.550167	0.704035
PC106530_c0_g1	21.1236	-0.262141	0.992528	-0.264114	0.791692	0.878418
PC10654_c0_g1	294.635	-0.180063	0.268815	-0.66984	0.50296	0.664032
PC10656_c1_g1	2.50695	-1.50633	1.23306	-1.22163	0.221849	0.390046
PC106564_c0_g1	25.9172	0.076065	0.405482	0.187591	0.851197	0.916149
PC10657_c2_g1	129.086	0.684679	0.454188	1.50748	0.131688	0.274087
PC10658_c0_g1	8.73308	-1.46915	0.711207	-2.06572	0.0388552	0.115905
PC25128_c1_g1	5.92917	-3.71218	0.922997	-4.02187	5.77369e-05	0.00069574
PC4696_c2_g1	5.00854	-3.71053	1.00834	-3.67984	0.000233378	0.00217321
PC10659_c0_g1	152.806	-0.186075	0.311241	-0.597849	0.549941	0.703923
PC17169_c0_g1	13.027	-3.70347	0.826076	-4.48321	7.35277e-06	0.000128711
PC10660_c0_g1	171.072	-0.611598	0.290864	-2.10269	0.0354928	0.10857
PC106605_c0_g1	20.5657	-0.406089	0.427961	-0.948891	0.342676	0.519019
PC106607_c0_g1	7.96336	-1.23316	0.580402	-2.12467	0.0336142	0.104412
PC10662_c0_g1	3.2454	-0.375054	1.36479	-0.274808	0.783464	0.872789
PC10663_c0_g1	68.4427	0.941021	0.482964	1.94843	0.0513639	0.141976
PC6238_c2_g1	3.56138	-3.69365	1.45672	-2.53559	0.0112257	0.04652
PC106677_c0_g1	43.0068	0.717833	0.44813	1.60184	0.109191	0.240481
PC11914_c0_g2	14.1491	-3.68723	0.78838	-4.67698	2.91135e-06	6.06599e-05
PC106679_c0_g1	71.4771	1.76862	0.83005	2.13073	0.0331111	0.103318
PC1067_c0_g1	124.642	0.191901	0.15539	1.23496	0.216845	0.384283
PC106717_c0_g1	26.9538	-1.81029	1.94806	-0.929279
PC10658_c1_g1	4.22123	-3.67838	0.906101	-4.05957	4.91637e-05	0.000611721
PC10673_c0_g1	984.771	-0.554133	0.357894	-1.54832	0.121546	0.259024
PC106747_c0_g1	13.5163	-0.423797	0.366796	-1.1554	0.247926	0.419306
PC10675_c0_g1	1170.85	-0.284646	0.189562	-1.5016	0.133202	0.27599
PC10675_c0_g2	246.407	-0.0224189	0.344262	-0.0651217	0.948077	0.971024
PC53699_c0_g1	5.95729	-3.67408	0.83879	-4.38021	1.18563e-05	0.000191976
PC10675_c1_g2	7.07968	-0.379915	0.428474	-0.886669	0.375257	0.549677
PC106775_c0_g1	7.2274	-1.29063	1.03315	-1.24922	0.211583	0.378066
PC106790_c0_g1	14.4284	-0.14663	0.47545	-0.308403	0.757775	0.854499
PC118281_c0_g1	4.76637	-3.67141	0.931074	-3.9432	8.04029e-05	0.000912632
PC118163_c0_g1	4.51755	-3.6563	1.16478	-3.13904	0.00169502	0.0106241
PC5867_c0_g3	5.06253	-3.65367	1.14256	-3.19779	0.00138483	0.00902283
PC106841_c0_g1	475.539	0.107969	0.140541	0.768239	0.442345	0.61121
PC19486_c0_g1	3.90439	-3.65289	0.93279	-3.91609	8.9995e-05	0.000999952
PC10686_c0_g1	637.548	0.255009	0.282744	0.901909	0.367105	0.542191
PC2060_c1_g1	102.469	-3.65263	0.538854	-6.77852	1.21412e-11	1.10433e-09
PC10688_c0_g1	50.6434	-0.0291689	0.18416	-0.158389	0.874151	0.929201
PC10688_c1_g1	4.15768	-1.17371	0.625392	-1.87676	0.0605511	0.159893
PC2347_c4_g1	2.96577	-3.64844	1.42614	-2.55827	0.0105195	0.0443707
PC1069_c0_g1	1123.22	0.194714	0.293069	0.664396	0.506437	0.666726
PC10690_c0_g1	213.004	-0.12037	0.254962	-0.47211	0.636848	0.769547
PC106908_c0_g1	518.975	0.360285	0.194377	1.85354	0.0638053	0.165831
PC10694_c0_g1	153.818	0.212748	0.166696	1.27626	0.201863	0.366
PC106943_c0_g1	9.16475	-0.571039	0.515298	-1.10817	0.267788	0.441656
PC106947_c0_g1	30.1338	0.142138	0.295258	0.481403	0.63023	0.764825
PC10695_c0_g1	86.9299	-0.40448	0.189584	-2.13351	0.0328826	0.102758
PC106959_c0_g1	5.58571	-0.522756	0.543113	-0.962518	0.335789	0.512527
PC106966_c0_g1	7.56373	-0.162743	0.442972	-0.367388	0.71333	0.824936
PC106969_c0_g1	9.43508	-0.348306	0.437955	-0.795301	0.426439	0.597739
PC10697_c0_g2	7.27905	-0.0389254	0.463128	-0.084049	0.933017	0.963347
PC4701_c1_g1	2.98644	-3.64481	1.07954	-3.37626	0.000734776	0.00545316
PC10698_c0_g1	256.061	0.432473	0.303618	1.4244	0.154331	0.304788
PC10699_c0_g1	111.255	-0.235133	0.262318	-0.896369	0.370056	0.544903
PC107_c0_g1	277.786	-0.394705	0.270689	-1.45815	0.1448	0.292624
PC1070_c0_g1	207.085	-0.533294	0.311169	-1.71384	0.0865585	0.205373
PC1070_c0_g2	92.9067	-0.551475	0.278925	-1.97714	0.0480255	0.135331
PC12930_c0_g2	9.51678	-3.6442	0.937433	-3.88742	0.000101314	0.00110071
PC10700_c2_g1	11.6748	-0.412116	0.368073	-1.11966	0.262859	0.435997
PC15356_c2_g2	4.19418	-3.63677	0.924992	-3.93167	8.4357e-05	0.000950031
PC10702_c0_g1	402.876	-0.0394777	0.317754	-0.12424	0.901125	0.94481
PC107023_c0_g1	955.237	1.4515	0.820012	1.7701	0.0767104	0.188967
PC10703_c0_g1	6.73565	0.227101	0.444175	0.511286	0.609151	0.749475
PC21391_c1_g1	5.43634	-3.63595	1.21026	-3.00428	0.00266206	0.0151145
PC107039_c0_g1	4.33463	0.274822	0.754263	0.364358	0.715591	0.826503
PC4389_c0_g1	9.76401	-3.63582	0.649417	-5.59859	2.16101e-08	9.28793e-07
PC9437_c0_g4	19.0559	-3.63551	0.637903	-5.69917	1.20392e-08	5.53966e-07
PC3333_c1_g1	4.83586	-3.63331	0.90345	-4.0216	5.78048e-05	0.000695945
PC10706_c0_g2	28.8303	0.00280657	0.335605	0.00836274	0.993328	0.996275
PC10708_c0_g1	11.7664	0.187327	0.425707	0.440037	0.65991	0.787475
PC4452_c0_g2	28.9278	-3.62788	0.575133	-6.3079	2.82851e-10	1.87959e-08
PC23576_c1_g1	4.69935	-3.62423	0.966088	-3.75144	0.000175819	0.00172468
PC18105_c0_g1	6.81522	-3.62348	0.879713	-4.11893	3.80629e-05	0.000498367
PC1071_c0_g1	876.415	0.212772	0.147632	1.44123	0.14952	0.298646
PC10710_c0_g1	15742.4	0.349933	0.232651	1.50411	0.132553	0.275176
PC21807_c0_g1	4.4869	-3.62183	0.998238	-3.62822	0.000285379	0.0025483
PC9777_c0_g1	3.84973	-3.61762	1.00238	-3.60902	0.000307356	0.00270887
PC10713_c0_g1	21.9526	-0.677318	0.329168	-2.05767	0.0396221	0.117614
PC10713_c1_g1	11.7102	0.63349	0.520313	1.21752	0.223408	0.391905
PC107143_c0_g1	13.7019	-0.584832	0.32627	-1.79248	0.0730562	0.182701
PC25004_c0_g1	4.21211	-3.61626	0.923086	-3.91758	8.94419e-05	0.000995018
PC82782_c0_g1	5.48468	-3.60713	1.06724	-3.37988	0.000725185	0.00539367
PC9909_c1_g1	17.2991	-3.60574	0.67631	-5.33149	9.74089e-08	3.36725e-06
PC10719_c0_g1	265.105	-0.235151	0.170056	-1.38278	0.166731	0.32135
PC1072_c0_g1	474.19	0.189595	0.269479	0.703562	0.481705	0.645528
PC34184_c0_g3	3.20741	-3.60413	0.971952	-3.70814	0.000208787	0.001991
PC15386_c0_g2	4.13114	-3.60285	0.995257	-3.62002	0.000294579	0.00261426
PC31139_c2_g1	4.78839	-3.59778	0.996503	-3.6104	0.000305722	0.00270055
PC10724_c0_g2	10.1712	-0.211869	0.4119	-0.514371	0.606993	0.748064
PC10725_c0_g2	136.191	-0.244336	0.262501	-0.930798	0.351958	0.528024
PC107255_c0_g1	8.65009	0.0616386	0.981207	0.0628192	0.94991	0.972066
PC36126_c0_g1	7.98494	-3.59759	0.92508	-3.88895	0.000100678	0.00109597
PC10726_c1_g2	32.0522	-0.424339	0.305848	-1.38742	0.165314	0.319631
PC10726_c1_g3	5.02157	-0.530445	0.472986	-1.12148	0.262083	0.435315
PC10726_c2_g1	20.7429	-0.0249942	0.384533	-0.0649987	0.948175	0.971088
PC107260_c0_g1	3.84592	-0.49297	0.69213	-0.71225	0.47631	0.640901
PC23021_c0_g1	4.27937	-3.59698	0.887122	-4.05466	5.02067e-05	0.000622254
PC107273_c0_g1	223.396	1.62336	0.846917	1.91679	0.0552645	0.149524
PC107275_c0_g1	16.1311	0.680086	0.321043	2.11837	0.0341441	0.105603
PC10728_c0_g1	12.1399	0.199607	0.338255	0.590109	0.555118	0.707971
PC10729_c0_g2	6.88386	-0.722669	0.903437	-0.79991	0.423763	0.595176
PC107290_c0_g1	25.4719	-0.267297	1.08055	-0.247371	0.804621	0.886761
PC1073_c0_g2	37.8799	0.0557345	0.355119	0.156946	0.875287	0.92994
PC1073_c0_g4	19.1802	0.292602	0.341324	0.857256	0.391303	0.565783
PC1073_c0_g5	839.569	0.693962	0.840474	0.82568	0.408986	0.581803
PC1073_c1_g1	792.309	1.15946	0.824897	1.40558	0.15985	0.311973
PC18493_c1_g1	1.79662	-3.59526	1.51954	-2.36602	0.0179803	0.0661092
PC5661_c0_g1	41.2927	-3.59213	0.408285	-8.79808	1.39176e-18	3.73566e-16
PC10731_c0_g1	46.9745	1.12512	0.56828	1.97987	0.0477177	0.13484
PC10732_c0_g2	25.8829	-0.284918	0.385075	-0.739903	0.459359	0.625875
PC10733_c0_g1	26.0234	-0.00568861	0.474911	-0.0119783	0.990443	0.994845
PC71922_c0_g1	8.13189	-3.58536	0.837375	-4.28167	1.85498e-05	0.000275709
PC107348_c0_g1	4.73388	-2.03163	1.20238	-1.68968	0.0910899	0.212519
PC10735_c0_g1	28.5916	0.365528	0.39156	0.933516	0.350554	0.526754
PC9735_c0_g1	20.9527	-3.58439	0.676096	-5.3016	1.14794e-07	3.87069e-06
PC14375_c0_g1	9.77933	-3.58336	0.719914	-4.97749	6.44147e-07	1.6754e-05
PC10739_c0_g1	48.8793	0.339124	0.421237	0.805068	0.42078	0.592362
PC3301_c0_g2	21.9013	-3.58187	1.12532	-3.18298	0.00145766	0.00940115
PC47251_c1_g1	4.90096	-3.58006	0.795812	-4.49862	6.83948e-06	0.000121964
PC10740_c0_g1	41.1332	-0.498525	0.444807	-1.12077	0.262387	0.435635
PC10740_c1_g2	13.8389	-0.333923	0.298979	-1.11688	0.264046	0.437212
PC107402_c0_g1	12.8015	-0.794868	0.377958	-2.10306	0.0354609	0.108523
PC107412_c0_g1	17.5878	-0.66801	0.458122	-1.45815	0.144799	0.292624
PC19778_c1_g1	4.3799	-3.57572	0.937028	-3.81602	0.00013562	0.00139377
PC10743_c0_g1	12.6406	-0.458685	0.323903	-1.41612	0.15674	0.307836
PC28520_c0_g1	4.86022	-3.56223	0.926488	-3.84487	0.000120617	0.0012701
PC7919_c0_g1	20.7389	-3.55923	0.469037	-7.58838	3.23942e-14	4.43444e-12
PC30875_c0_g1	16.907	-3.55829	0.705955	-5.04039	4.64577e-07	1.27319e-05
PC10745_c0_g3	3.77686	-0.857637	0.715315	-1.19896	0.230542	0.40005
PC10746_c0_g1	32.6752	-0.985964	0.775289	-1.27174	0.203467	0.368347
PC10746_c0_g2	6.0652	-0.331555	0.568015	-0.583708	0.559417	0.711104
PC10747_c0_g1	83.7702	0.147781	0.166701	0.886501	0.375348	0.54968
PC21778_c1_g1	5.07326	-3.55702	0.922816	-3.85452	0.000115956	0.00123104
PC107476_c0_g1	329.758	0.295657	0.161021	1.83614	0.0663374	0.170438
PC1075_c0_g1	617.306	-0.0935366	0.0915124	-1.02212	0.306724	0.482809
PC10750_c0_g1	38.82	0.149328	0.538244	0.277436	0.781445	0.871474
PC38791_c0_g1	2.0708	-3.55691	1.60302	-2.21888	0.0264949	0.0881061
PC10754_c0_g1	360.727	-0.201601	0.136722	-1.47453	0.140338	0.28643
PC107543_c0_g1	17.4282	-0.101068	0.840295	-0.120277	0.904264	0.946185
PC107546_c0_g1	34.7779	-0.38153	0.264178	-1.44421	0.148679	0.297566
PC17173_c0_g1	4.32905	-3.55253	0.986621	-3.60071	0.000317351	0.00277779
PC10756_c0_g1	118.171	0.0265243	0.144445	0.183629	0.854305	0.917798
PC107569_c0_g1	10.9636	0.771149	0.468771	1.64504	0.0999607	0.226794
PC10757_c1_g1	5.65875	-0.110106	0.762422	-0.144417	0.885171	0.935648
PC107579_c0_g1	199.497	1.00943	1.02449	0.985302	0.324476	0.500931
PC30498_c0_g1	3.88935	-3.55206	0.930671	-3.81667	0.000135266	0.00139118
PC118283_c0_g1	3.29264	-3.55122	1.05603	-3.36281	0.000771522	0.00565687
PC107619_c0_g1	12.2914	0.304227	0.399208	0.762075	0.446015	0.614466
PC10762_c0_g1	44.1739	0.252042	0.800559	0.314833	0.752889	0.850895
PC10763_c0_g1	16.045	-1.0363	0.578455	-1.79149	0.0732147	0.182961
PC42130_c0_g2	8.71333	-3.55091	0.790948	-4.48944	7.14118e-06	0.000126231
PC9909_c0_g1	4.70197	-3.55085	0.959688	-3.7	0.000215599	0.00204528
PC10766_c0_g1	17.0084	0.218788	0.649311	0.336954	0.736152	0.84034
PC10768_c0_g1	82.7629	0.348118	0.417506	0.833803	0.404392	0.577751
PC10769_c0_g1	37.062	-0.544448	0.41135	-1.32356	0.185648	0.346019
PC15650_c0_g2	3.49388	-3.54413	0.984779	-3.59891	0.000319558	0.00279338
PC1077_c0_g1	299.926	0.0578903	0.116932	0.495076	0.620546	0.757677
PC10770_c0_g1	86.6726	-0.0412513	0.282369	-0.14609	0.88385	0.93502
PC10770_c1_g2	68.331	0.24839	0.352223	0.705206	0.480682	0.644536
PC10771_c0_g1	397.03	0.353282	0.189103	1.86819	0.061735	0.161941
PC1217_c0_g2	14.6968	-3.54115	0.646874	-5.47424	4.39384e-08	1.68244e-06
PC13445_c0_g1	3.84095	-3.53689	1.13238	-3.1234	0.00178774	0.011081
PC15296_c1_g1	6.08496	-3.53675	0.9692	-3.64914	0.000263116	0.00239005
PC10778_c0_g1	18.3067	0.0908949	0.44848	0.202673	0.83939	0.90898
PC6438_c0_g1	26.5545	-3.53624	1.09234	-3.2373	0.00120666	0.00808769
PC10778_c2_g1	8.36214	0.128523	0.527014	0.243871	0.807331	0.888138
PC107798_c0_g1	4.32862	1.51006	0.852106	1.77215	0.0763689	0.18838
PC1078_c0_g1	267.23	0.041832	0.241664	0.1731	0.862573	0.922671
PC10781_c0_g3	42.3402	0.238862	0.325021	0.734912	0.462393	0.628464
PC10782_c0_g1	626.395	0.0915034	0.185255	0.493933	0.621353	0.758017
PC71804_c0_g1	5.88255	-3.53351	0.817928	-4.32007	1.55979e-05	0.00023964
PC107833_c0_g1	1.82158	2.40227	2.06533	1.16314	0.244772	0.41586
PC10784_c0_g1	11.0263	-0.414737	0.376844	-1.10055	0.271091	0.444959
PC1795_c7_g1	9.69389	-3.53182	0.697918	-5.06051	4.18145e-07	1.16816e-05
PC1430_c1_g1	1120.09	-3.53157	0.23834	-14.8173	1.13178e-49	1.47552e-46
PC9590_c0_g2	4.95701	-3.53035	0.944504	-3.73778	0.000185652	0.00180609
PC12136_c0_g2	84.5732	-3.52533	0.265282	-13.289	2.68284e-40	2.62324e-37
PC107852_c0_g1	21.1173	-0.502548	0.453062	-1.10922	0.267333	0.441146
PC35346_c2_g1	4.18774	-3.5174	0.947225	-3.71337	0.000204518	0.00195711
PC10786_c0_g1	202.76	-0.0673426	0.21635	-0.311268	0.755597	0.852942
PC9892_c1_g2	5.06542	-3.51235	0.894537	-3.92644	8.62111e-05	0.000967331
PC9127_c0_g1	6.59063	-3.5085	0.853536	-4.11055	3.94718e-05	0.000512647
PC10788_c1_g1	29.9813	0.483177	0.278768	1.73326	0.0830491	0.199685
PC2910_c8_g1	6.20538	-3.50767	0.841595	-4.16789	3.07435e-05	0.000416887
PC15347_c2_g3	13.4862	-3.50706	0.613501	-5.71647	1.08763e-08	5.07276e-07
PC10790_c0_g1	15.7369	-0.231057	0.438589	-0.526819	0.598319	0.741782
PC10792_c0_g2	157.532	0.489519	0.347671	1.40799	0.159133	0.310996
PC10793_c0_g1	285.985	0.188735	0.285103	0.661988	0.507979	0.668017
PC10658_c1_g2	4.79002	-3.49947	1.00326	-3.48808	0.000486494	0.00391973
PC34131_c0_g1	53.8648	-3.49412	0.523411	-6.67567	2.46107e-11	2.08605e-09
PC10797_c0_g1	1307.12	0.440748	0.206038	2.13915	0.0324231	0.101938
PC10798_c0_g2	13.2053	0.352456	0.592786	0.594576	0.552127	0.705339
PC108_c0_g1	507.061	-0.233428	0.128307	-1.81929	0.0688673	0.175293
PC19553_c0_g1	5.08713	-3.48769	0.889537	-3.92079	8.82578e-05	0.000985048
PC1080_c0_g2	221.974	0.332226	0.399712	0.831164	0.405881	0.579084
PC10801_c0_g1	13.7984	-0.428402	0.332295	-1.28922	0.197321	0.360486
PC10802_c0_g1	181.568	0.420563	0.287914	1.46072	0.144091	0.29183
PC10808_c0_g1	245.109	0.154002	0.140117	1.0991	0.271725	0.445707
PC10809_c1_g1	23.5494	-0.150002	0.426458	-0.35174	0.725033	0.832772
PC31069_c0_g2	4.8895	-3.48049	0.922566	-3.77262	0.000161545	0.0016077
PC8342_c0_g1	16.2182	-3.48038	0.571201	-6.09309	1.10754e-09	6.4653e-08
PC13869_c0_g2	12.5912	-3.47945	0.60485	-5.75258	8.78942e-09	4.18498e-07
PC29630_c1_g1	12.918	-3.47943	0.583255	-5.96553	2.43835e-09	1.3064e-07
PC1081_c3_g1	10.6473	-0.816312	0.494531	-1.65068	0.0988042	0.224934
PC1081_c6_g2	14.6187	-0.33157	0.54822	-0.604813	0.545304	0.699955
PC15570_c0_g1	17.2154	-3.46531	0.55891	-6.20012	5.64185e-10	3.49463e-08
PC10811_c0_g1	7.04621	0.288518	0.482727	0.597683	0.550052	0.703975
PC10813_c0_g1	26.5177	0.866019	0.533484	1.62333	0.104519	0.233575
PC108136_c0_g1	156.868	1.67113	0.884724	1.88887	0.0589098	0.156495
PC10815_c0_g1	7.54088	0.938592	0.48883	1.92008	0.0548479	0.148823
PC108159_c0_g1	17.0203	-0.424656	0.497825	-0.853021	0.393647	0.567853
PC10816_c0_g1	9.22597	-0.973239	1.01228	-0.961433	0.336334	0.512932
PC10816_c2_g1	45.4433	-0.246142	0.243409	-1.01123	0.311908	0.488069
PC10817_c0_g1	85.6611	0.0898815	0.234433	0.383401	0.701423	0.816443
PC1043_c7_g1	10.2782	-3.46513	0.752438	-4.6052	4.12071e-06	8.04649e-05
PC13487_c1_g1	4.9971	-3.46262	0.925917	-3.73967	0.000184262	0.00179656
PC1082_c0_g1	71.4602	0.0549093	0.183146	0.299813	0.76432	0.858907
PC9755_c0_g1	13.7275	-3.459	0.624238	-5.54115	3.00494e-08	1.22243e-06
PC108236_c0_g1	4.769	-1.12281	0.567394	-1.97889	0.0478288	0.135063
PC116303_c0_g1	5.23972	-3.457	0.961563	-3.59519	0.000324152	0.00282452
PC10827_c0_g1	14.0359	-0.381607	0.388471	-0.982331	0.325937	0.502449
PC38241_c0_g1	5.84392	-3.45681	0.786162	-4.39708	1.09719e-05	0.000180197
PC12192_c0_g1	7.71827	-3.45545	0.749093	-4.61284	3.97199e-06	7.81216e-05
PC10830_c0_g1	233.776	0.23103	0.148835	1.55226	0.120601	0.257551
PC10831_c0_g1	24.8721	1.34583	0.933966	1.44098
PC26020_c0_g1	401.173	-3.45228	0.229412	-15.0484	3.53834e-51	5.09856e-48
PC10833_c0_g1	779.699	1.48674	0.757659	1.96228	0.0497301	0.138604
PC2556_c1_g1	1196.74	-3.45162	0.215651	-16.0056	1.16773e-57	2.90637e-54
PC8149_c1_g2	3.51003	-3.44878	1.10115	-3.13197	0.00173637	0.0108263
PC10837_c0_g1	193.332	0.316967	0.251656	1.25952	0.207841	0.373599
PC10838_c0_g1	48.9835	0.782552	0.404767	1.93334	0.0531944	0.145606
PC14017_c0_g3	3.2868	-3.44765	0.948823	-3.63361	0.000279483	0.00250724
PC10841_c0_g1	74.0504	0.251316	0.168868	1.48824	0.136688	0.281266
PC10843_c0_g1	22248.2	0.240371	0.366349	0.656126	0.511743	0.671033
PC52856_c0_g1	5.1119	-3.44743	1.23702	-2.78689	0.00532166	0.0262138
PC10847_c0_g1	38.1552	-0.264493	0.297439	-0.889232	0.373878	0.54857
PC108471_c0_g1	62.6929	-0.502314	0.50001	-1.00461	0.315086	0.491114
PC7980_c0_g1	391.643	-3.44495	0.2391	-14.408	4.61179e-47	5.48963e-44
PC11178_c0_g1	632.747	-3.44456	0.324957	-10.6	2.97847e-26	1.69884e-23
PC46691_c0_g1	7.42565	-3.43914	0.698187	-4.92582	8.40086e-07	2.0871e-05
PC10852_c0_g1	5.30433	-0.0132977	0.561221	-0.0236941	0.981097	0.989772
PC108535_c0_g1	10.5527	-0.530657	0.394003	-1.34683	0.178034	0.335966
PC1547_c4_g1	4.56314	-3.43804	1.00114	-3.43414	0.000594434	0.00459859
PC108544_c0_g1	235.824	1.08304	0.631543	1.71491	0.0863619	0.205104
PC18351_c0_g1	52.0678	-3.43549	0.507087	-6.77495	1.24448e-11	1.12077e-09
PC1086_c0_g1	450.529	0.513776	0.346115	1.48441	0.137701	0.282631
PC10861_c0_g3	10.3254	-0.570155	0.358947	-1.58841	0.112194	0.244986
PC10862_c0_g1	6.73453	-1.0931	0.551224	-1.98304	0.047363	0.134165
PC21971_c1_g1	3.24944	-3.43395	1.02433	-3.35239	0.000801161	0.00582117
PC10866_c0_g1	131.234	0.0199626	0.277619	0.0719067	0.942676	0.968782
PC35376_c0_g1	21.9208	-3.43314	0.91118	-3.7678	0.000164695	0.00163489
PC18303_c0_g2	5.01737	-3.4327	0.921791	-3.72395	0.000196128	0.0018927
PC10869_c0_g1	5.12554	-0.36763	0.570848	-0.644007	0.519571	0.678179
PC10869_c0_g3	9.01528	-1.35405	0.803894	-1.68437	0.0921102	0.214165
PC10869_c0_g4	17.1711	0.393068	0.406623	0.966662	0.333713	0.510497
PC105281_c0_g1	3.61879	-3.42781	0.937986	-3.65443	0.00025775	0.00235286
PC1087_c0_g2	2.6241e+06	0.0347682	0.10716	0.324451	0.745596	0.845938
PC28813_c0_g1	6.03558	-3.42345	0.825064	-4.14932	3.3347e-05	0.000445788
PC17224_c0_g1	7.62334	-3.42141	0.750397	-4.55947	5.12834e-06	9.64312e-05
PC1087_c0_g6	116.416	0.016104	0.174719	0.0921712	0.926562	0.959506
PC96915_c0_g1	3.02026	-3.41986	1.03699	-3.29788	0.000974171	0.00680032
PC10871_c0_g1	72.0839	0.155557	0.171592	0.906552	0.364644	0.539925
PC108747_c0_g1	9.10433	1.15625	0.700314	1.65105	0.0987281	0.224822
PC10875_c0_g1	14.5745	-0.0453694	0.434524	-0.104412	0.916843	0.953951
PC10877_c0_g1	18.6089	-0.290312	0.484859	-0.598755	0.549336	0.703511
PC10878_c0_g1	105.748	0.0989639	0.137302	0.720774	0.471049	0.636077
PC10878_c0_g2	10.6345	-0.213343	0.944755	-0.225819	0.821343	0.897602
PC6432_c0_g1	122.183	-3.41926	0.315057	-10.8528	1.93323e-27	1.23089e-24
PC5784_c0_g1	6.48776	-3.4143	0.828508	-4.12102	3.77201e-05	0.000494825
PC10883_c0_g1	153.205	0.0308333	0.24966	0.123501	0.90171	0.945006
PC16824_c2_g1	8.1899	-3.40721	0.922054	-3.69524	0.000219678	0.00207167
PC35471_c0_g1	4.55503	-3.40698	1.29004	-2.64099	0.00826634	0.0369501
PC10887_c0_g1	31.3777	1.1041	0.555556	1.98738	0.0468806	0.133254
PC20556_c0_g1	4.16144	-3.40603	0.990388	-3.43908	0.000583686	0.00453081
PC108889_c0_g1	12.6156	-0.863763	1.94493	-0.444109	0.656964	0.785362
PC1089_c0_g1	910.557	0.217816	0.182918	1.19078	0.233739	0.403589
PC34323_c0_g1	35.6201	-3.40475	0.378846	-8.98717	2.53685e-19	7.54933e-17
PC10891_c0_g1	103.822	0.286904	0.325179	0.882296	0.377617	0.551999
PC10892_c0_g2	13.5759	0.419129	0.347204	1.20715	0.227373	0.396371
PC3214_c8_g1	5.98214	-3.40474	0.951477	-3.57838	0.000345736	0.00297106
PC10894_c0_g1	2024.78	0.0602063	0.396382	0.151889	0.879274	0.932466
PC10894_c1_g1	9.10932	0.647055	0.369441	1.75144	0.0798694	0.194541
PC6207_c1_g1	4.39224	-3.40416	0.881655	-3.8611	0.000112877	0.0012034
PC108960_c0_g1	68.0913	-1.82578	1.7553	-1.04015	0.298269	0.473749
PC17953_c1_g1	3.90273	-3.39611	0.946759	-3.58709	0.000334392	0.00289165
PC10899_c0_g1	9.27662	-0.823538	0.480866	-1.71261	0.0867835	0.205731
PC53787_c0_g1	9.90428	-3.39607	0.652279	-5.20647	1.92467e-07	6.05675e-06
PC109_c0_g1	311.571	0.0740913	0.103444	0.716244	0.47384	0.638771
PC1978_c0_g1	171.53	-3.39212	0.352531	-9.62219	6.4444e-22	2.485e-19
PC109_c1_g1	520.286	0.135632	0.394169	0.344095	0.730775	0.836986
PC109_c14_g1	9.03269	-0.79802	0.544445	-1.46575	0.142716	0.289751
PC109_c2_g1	280.724	-0.168236	0.146322	-1.14976	0.250241	0.42184
PC109_c2_g2	29.7408	0.201889	0.214492	0.941239	0.346583	0.522767
PC109_c2_g3	24.3071	0.115439	0.28015	0.41206	0.680295	0.802036
PC109_c2_g5	623.76	0.495532	0.344174	1.43977	0.149932	0.299056
PC6337_c0_g1	9.08898	-3.38741	0.77362	-4.37865	1.19417e-05	0.000193112
PC1090_c0_g1	167.13	-0.145826	0.29466	-0.494895	0.620674	0.757698
PC4308_c0_g1	182.794	-3.37877	0.27413	-12.3255	6.60702e-35	5.48142e-32
PC10900_c0_g1	30.909	-0.449135	0.225179	-1.99457	0.0460895	0.131496
PC10900_c1_g1	69.6787	0.00481956	0.326212	0.0147743	0.988212	0.993624
PC10901_c0_g1	435.218	-0.202523	0.466295	-0.434322	0.664054	0.790057
PC10902_c0_g1	14.3522	-0.823382	0.388085	-2.12165	0.0338668	0.10504
PC64322_c0_g1	11.598	-3.37495	0.991294	-3.40459	0.000662635	0.00501427
PC10903_c2_g1	4.30289	-0.0817414	0.852369	-0.0958991	0.923601	0.957938
PC9156_c0_g2	278.352	-3.3741	0.412547	-8.17871	2.86909e-16	5.20198e-14
PC12562_c0_g1	4.75618	-3.37329	1.24008	-2.72023	0.00652373	0.0307201
PC10908_c0_g1	1550.81	0.0913742	0.152066	0.600886	0.547916	0.702286
PC1091_c0_g1	217.989	-0.10736	0.153261	-0.700504	0.483612	0.647298
PC14728_c0_g1	7.22952	-3.36865	0.84908	-3.96741	7.26567e-05	0.000837556
PC10912_c0_g1	16.5286	-0.240145	0.472713	-0.508014	0.611444	0.751014
PC6615_c1_g1	7.15973	-3.36816	0.743174	-4.53212	5.83941e-06	0.000107368
PC10917_c0_g1	554.446	0.530232	0.344896	1.53737	0.124203	0.262906
PC10917_c1_g1	20.8982	-0.304014	0.369282	-0.823257	0.410362	0.582934
PC10918_c0_g1	4005.62	0.14786	0.102342	1.44477	0.148522	0.29744
PC10919_c0_g1	92.7126	-0.193418	0.50418	-0.383629	0.701254	0.816392
PC1092_c0_g1	588.556	0.193988	0.159426	1.21679	0.223685	0.392241
PC30887_c0_g1	12.1954	-3.36761	0.725854	-4.63952	3.49225e-06	7.05094e-05
PC10921_c0_g2	37.3109	-0.0981374	0.355456	-0.276089	0.78248	0.872119
PC54569_c0_g1	6.34404	-3.36693	0.731727	-4.60134	4.19778e-06	8.16242e-05
PC10923_c0_g1	8.43063	-0.353611	0.797363	-0.443476	0.657421	0.785703
PC10924_c1_g1	6.55242	0.457396	0.433215	1.05582	0.291052	0.46618
PC10924_c1_g4	4.82265	-0.305043	0.758433	-0.402202	0.687535	0.806381
PC10925_c0_g1	11.4535	-0.037232	0.308793	-0.120573	0.90403	0.946157
PC10926_c0_g1	276.502	-0.579611	0.304694	-1.90227	0.0571357	0.153014
PC10926_c1_g1	11.5124	-0.473858	0.596631	-0.794223	0.427066	0.598218
PC10926_c3_g4	7.89451	0.293619	0.389463	0.753909	0.450904	0.619193
PC13486_c0_g1	26.3924	-3.36672	0.455147	-7.39701	1.39287e-13	1.72552e-11
PC61032_c0_g1	2.52329	-3.36656	1.14038	-2.95215	0.00315571	0.0173002
PC10929_c0_g1	24.4404	0.30179	0.468571	0.644064	0.519534	0.678172
PC1093_c0_g1	260.114	-0.310436	0.184037	-1.68681	0.0916396	0.213343
PC20503_c1_g1	13.83	-3.36108	0.679969	-4.94298	7.69367e-07	1.94494e-05
PC10930_c1_g1	26.737	0.44299	0.304227	1.45612	0.145361	0.293379
PC10930_c2_g2	4.08119	0.437235	1.03546	0.422259	0.672836	0.796407
PC109300_c0_g1	19.5161	-0.569928	0.460877	-1.23662	0.21623	0.383575
PC10931_c0_g2	64.3013	0.439841	0.285159	1.54244	0.122967	0.26124
PC10931_c1_g1	76.191	-0.302924	0.249878	-1.21229	0.225402	0.394113
PC109319_c0_g1	60.203	-1.86657	1.55039	-1.20394	0.228614	0.397649
PC23065_c0_g1	208.915	-3.36084	0.690684	-4.86596	1.13905e-06	2.72833e-05
PC10933_c0_g1	463.261	0.235916	0.203131	1.1614	0.245481	0.416578
PC13136_c0_g1	6.95286	-3.35928	0.772776	-4.34703	1.37993e-05	0.000216875
PC10934_c0_g1	2861.35	0.501605	0.346279	1.44856	0.147461	0.296243
PC10935_c0_g1	31.9031	-0.430365	0.34516	-1.24686	0.212451	0.379047
PC10937_c0_g1	4.42198	-1.34048	0.68112	-1.96805	0.0490623	0.137305
PC10938_c0_g1	26.2266	0.276647	0.349101	0.792454	0.428096	0.59888
PC17563_c1_g1	18.9052	-3.35523	0.934232	-3.59143	0.000328873	0.00285566
PC7054_c0_g4	4.20038	-3.35448	0.922917	-3.63465	0.000278362	0.00249951
PC7126_c0_g1	7.2363	-3.34988	1.04762	-3.19761	0.00138571	0.00902639
PC10940_c0_g1	26.2311	-0.915734	0.604427	-1.51505	0.129761	0.271501
PC25468_c2_g1	4.95134	-3.34487	0.973957	-3.43431	0.00059406	0.004597
PC10941_c0_g1	6.78776	-0.474959	0.6464	-0.734776	0.462476	0.628496
PC10942_c0_g1	48.6123	-0.447511	0.608284	-0.735694	0.461917	0.628089
PC10942_c0_g2	21.7521	-0.63268	0.499098	-1.26765	0.204924	0.370129
PC109436_c0_g1	6717.63	1.6991	0.898142	1.89179	0.0585191	0.155683
PC59706_c0_g1	8.17269	-3.33462	0.858341	-3.88497	0.000102344	0.00110979
PC10946_c0_g1	10.446	-0.633826	0.56378	-1.12424	0.260909	0.434025
PC10946_c1_g1	80.9129	0.0259754	0.44715	0.058091	0.953676	0.974618
PC16633_c2_g1	11.1438	-3.33021	0.642039	-5.18692	2.13799e-07	6.62898e-06
PC10946_c1_g4	7.88382	-0.254625	0.583877	-0.436093	0.662769	0.789166
PC10947_c0_g1	18.3325	-0.101363	0.412453	-0.245756	0.805871	0.887353
PC10949_c0_g1	15.3101	-0.333928	0.432653	-0.771815	0.440224	0.609153
PC105464_c0_g1	7.93167	-3.32984	1.02061	-3.26259	0.00110398	0.00753362
PC1095_c0_g1	166.116	0.135465	0.218759	0.619244	0.535755	0.692274
PC1095_c0_g2	60.0119	0.357079	0.231891	1.53985	0.123596	0.262067
PC10950_c0_g1	754.427	0.14289	0.313034	0.456469	0.648053	0.778448
PC10951_c0_g1	1062.98	0.376233	0.396219	0.949558	0.342337	0.518706
PC10953_c0_g3	7.20936	-0.635034	0.796435	-0.797345	0.42525	0.596654
PC10953_c0_g4	6.56926	-0.0281561	0.533342	-0.0527919	0.957898	0.97688
PC10953_c0_g5	5.45356	-1.43712	0.750959	-1.91372	0.0556564	0.150307
PC10954_c0_g2	437.554	0.234005	0.425045	0.550541	0.581948	0.728746
PC10955_c0_g2	5.45605	0.0116967	0.532236	0.0219765	0.982467	0.990605
PC10956_c0_g1	69.0922	0.423253	0.211292	2.00317	0.0451594	0.129566
PC10957_c0_g1	9.70607	-0.200283	0.384184	-0.521321	0.602143	0.744652
PC10958_c0_g1	25.3576	-0.155066	0.367292	-0.422187	0.672889	0.796435
PC1096_c0_g1	84.2398	0.509942	0.324494	1.5715	0.116067	0.250725
PC1096_c1_g1	42.6595	0.224123	0.263292	0.851235	0.394639	0.568594
PC1096_c2_g1	10.2023	-0.25483	0.446177	-0.571141	0.567904	0.717857
PC10960_c0_g1	1321.88	1.49494	0.731454	2.04379	0.0409748	0.120598
PC31885_c1_g1	6.89114	-3.32942	0.751033	-4.43313	9.28753e-06	0.000156959
PC10964_c0_g2	44.2061	-0.547419	0.400507	-1.36681	0.171684	0.327848
PC10965_c0_g2	6.35727	-0.13345	0.546347	-0.244259	0.80703	0.887986
PC10965_c0_g3	26.1562	0.263439	0.240605	1.0949	0.273559	0.447588
PC10965_c0_g4	7.33612	0.164104	0.438405	0.374319	0.708167	0.821138
PC20992_c0_g1	15.614	-3.32655	0.590129	-5.63699	1.7305e-08	7.67871e-07
PC10967_c0_g1	561.588	-0.257469	0.169884	-1.51556	0.129631	0.271361
PC12537_c1_g1	4.83294	-3.32176	1.1106	-2.99097	0.00278097	0.0156468
PC10969_c0_g1	11.5001	-0.939318	0.447494	-2.09906	0.0358114	0.109266
PC10969_c1_g1	46.0405	-0.186605	0.239226	-0.780037	0.435369	0.605299
PC1097_c0_g1	725.156	0.004791	0.128449	0.0372988	0.970247	0.983612
PC10970_c0_g2	6.70982	0.750811	0.514767	1.45855	0.14469	0.292543
PC10971_c0_g1	7.76885	-0.00168128	0.414968	-0.00405159	0.996767	0.997897
PC10973_c0_g1	7.03679	0.522117	0.436334	1.1966	0.231462	0.401049
PC6755_c1_g2	8.11375	-3.31994	0.814197	-4.07756	4.55098e-05	0.000572333
PC10977_c0_g1	6.84871	1.30624	1.16906	1.11734	0.263849	0.437136
PC10977_c1_g7	4.73346	0.330954	0.579107	0.57149	0.567667	0.717821
PC109787_c0_g1	6.56562	-0.316496	0.488917	-0.647341	0.517411	0.676511
PC10979_c0_g2	4.0728	-3.18627	1.52886	-2.08408	0.037153	0.112135
PC8722_c0_g2	4.41563	-3.31935	0.899468	-3.69035	0.000223949	0.00210263
PC1098_c0_g2	357.978	-0.174124	0.17556	-0.991821	0.321285	0.497491
PC1098_c0_g4	384.464	0.0813875	0.134092	0.606953	0.543882	0.698599
PC1098_c1_g1	50.5581	0.127953	0.28464	0.449527	0.653052	0.782594
PC1098_c2_g1	168.05	-0.165358	0.211586	-0.781518	0.434498	0.604604
PC1098_c3_g1	145.261	-0.047372	0.195977	-0.241722	0.808995	0.889184
PC1098_c3_g2	28.1333	0.210207	0.293923	0.715177	0.4745	0.639305
PC217_c0_g3	6979.29	-3.31649	0.19873	-16.6884	1.59108e-62	4.35606e-59
PC1098_c5_g1	27.0348	0.0666098	0.223494	0.298038	0.765674	0.859713
PC10981_c0_g1	14.8788	0.195639	0.556579	0.351502	0.725212	0.832907
PC10984_c0_g1	22.4074	-0.772809	0.406218	-1.90245	0.0571127	0.152997
PC10984_c0_g2	10.385	-0.694661	0.441008	-1.57517	0.115218	0.249461
PC10987_c0_g1	103.166	0.358728	0.305089	1.17581	0.239669	0.410437
PC10988_c0_g1	46.8877	-0.712154	0.473399	-1.50434	0.132494	0.275176
PC109881_c0_g1	7499.31	1.38696	0.991363	1.39905	0.161799	0.314873
PC32367_c0_g1	1.7855	-3.30308	1.34457	-2.45661	0.0140254	0.0551229
PC10991_c0_g1	13.9874	-1.24633	0.633278	-1.96806	0.0490614	0.137305
PC109917_c0_g1	22.0015	1.48694	0.756	1.96685	0.0492004	0.137478
PC13325_c5_g1	8.32205	-3.30193	0.94463	-3.49548	0.000473216	0.00382965
PC20359_c0_g1	2.83204	-3.30099	1.03446	-3.19104	0.00141762	0.00919924
PC8191_c0_g1	7.18743	-3.29743	0.802416	-4.10938	3.9673e-05	0.00051404
PC10998_c0_g1	54.0557	-0.54151	0.290289	-1.86542	0.062123	0.162678
PC25292_c0_g1	7.48601	-3.29457	0.710587	-4.63641	3.54515e-06	7.1367e-05
PC27745_c0_g1	2.8617	-3.29219	1.01905	-3.23066	0.00123504	0.00824771
PC11_c0_g1	263.477	0.124547	0.135431	0.919632	0.357765	0.53352
PC11_c1_g1	54.1916	-0.158477	0.207959	-0.762058	0.446025	0.614466
PC110_c0_g1	44.0227	0.274967	0.357711	0.768685	0.442081	0.610999
PC110_c0_g2	176.227	0.115894	0.175247	0.661318	0.508409	0.668308
PC1100_c0_g1	1000.17	-0.150094	0.33126	-0.4531	0.650477	0.780401
PC11000_c0_g1	8.87347	1.64908	1.03866	1.58769	0.112356	0.245243
PC110013_c0_g1	4.82745	-0.339169	0.502625	-0.674795	0.499806	0.661083
PC5995_c1_g1	7.31204	-3.28816	0.823901	-3.99097	6.58033e-05	0.000773253
PC24723_c0_g2	6.02628	-3.28798	0.799317	-4.11348	3.89734e-05	0.000508343
PC7648_c0_g1	21.6835	-3.28282	0.558256	-5.8805	4.09024e-09	2.09793e-07
PC11006_c2_g1	9.13911	0.794773	0.402147	1.97633	0.0481179	0.135518
PC11008_c0_g1	4444.62	0.0495534	0.0993063	0.498995	0.617783	0.755593
PC11008_c0_g2	9.45244	0.520448	0.469864	1.10766	0.26801	0.441804
PC11009_c0_g2	45.2234	0.217273	0.381329	0.569778	0.568828	0.718627
PC1101_c0_g1	8.78897	2.15974	1.05629	2.04464	0.04089	0.120401
PC11010_c0_g1	3.66483	-1.52076	0.725577	-2.09593	0.0360887	0.10977
PC11012_c0_g1	317.684	0.736778	0.43458	1.69538	0.090003	0.210876
PC110172_c0_g1	65.9586	-2.10942	1.43342	-1.4716	0.14113	0.287618
PC11018_c0_g1	10.187	-0.30914	0.476955	-0.648154	0.516886	0.675979
PC11018_c0_g2	10.3201	0.854669	0.796958	1.07241	0.283534	0.458326
PC11018_c0_g3	6.15531	-0.65017	0.544614	-1.19382	0.232549	0.402422
PC1102_c0_g1	3734.18	0.105952	0.285805	0.370716	0.710849	0.823285
PC11021_c0_g1	41.5937	0.371915	0.299552	1.24157	0.214395	0.381447
PC11023_c0_g1	37.9945	-0.0902757	0.222732	-0.40531	0.685249	0.805183
PC11023_c1_g1	17.6272	-0.556923	0.284791	-1.95555	0.0505182	0.140309
PC11024_c0_g1	289.008	-0.291201	0.159852	-1.82169	0.0685021	0.17459
PC11024_c0_g2	689.105	-0.00149807	0.168657	-0.00888235	0.992913	0.996173
PC110274_c0_g1	2.54723	-0.551485	1.31655	-0.418888	0.675298	0.798234
PC12666_c1_g1	24.5866	-3.28211	0.842332	-3.89646	9.76076e-05	0.00106807
PC11029_c0_g1	568.948	0.100041	0.154539	0.647349	0.517406	0.676511
PC1103_c0_g1	136.23	0.263637	0.232595	1.13346	0.257021	0.429891
PC1103_c0_g2	118.485	0.215244	0.179745	1.1975	0.231112	0.400645
PC11031_c0_g1	410.264	0.102544	0.215053	0.476829	0.633484	0.767345
PC29731_c0_g2	13.1083	-3.28086	0.702424	-4.67077	3.00069e-06	6.2143e-05
PC1104_c0_g2	4.57976	0.586111	0.818795	0.715822	0.474101	0.639036
PC5446_c0_g1	11.055	-3.28047	0.630103	-5.20625	1.92696e-07	6.05699e-06
PC10643_c0_g1	4.274	-3.27797	1.01334	-3.2348	0.00121726	0.00814621
PC11044_c1_g1	7.49176	-0.809684	1.83488	-0.441274	0.659015	0.786817
PC11046_c1_g2	131.549	0.351542	0.301321	1.16667	0.243344	0.414398
PC11049_c0_g1	167.465	-0.0276324	0.429653	-0.0643132	0.948721	0.971343
PC22161_c1_g2	2.93598	-3.27713	1.02541	-3.19593	0.0013938	0.00907265
PC46126_c1_g2	3.49239	-3.27397	1.06703	-3.06829	0.00215286	0.0127994
PC2344_c4_g1	12.9516	-3.2725	0.643331	-5.0868	3.64157e-07	1.04457e-05
PC11055_c0_g2	6.12698	1.80509	1.10836	1.62862	0.103394	0.231849
PC11055_c0_g3	6.44468	0.564505	0.658703	0.856994	0.391448	0.565963
PC11056_c0_g1	107.58	0.644413	0.543315	1.18608	0.235592	0.405663
PC11059_c1_g1	57.9931	-0.623089	0.401014	-1.55378	0.120236	0.257033
PC1106_c0_g1	313.732	-0.0144322	0.11185	-0.129032	0.897333	0.94268
PC1106_c1_g1	55.2874	-0.132685	0.169893	-0.780992	0.434807	0.604824
PC1106_c1_g2	10.8192	-0.347985	0.3421	-1.0172	0.309057	0.485003
PC1106_c1_g3	140.948	-0.021693	0.174682	-0.124186	0.901168	0.94481
PC11061_c0_g1	38.9774	-0.523453	0.537433	-0.973987	0.330063	0.506585
PC17385_c0_g1	4.23421	-3.26876	0.82738	-3.95074	7.79103e-05	0.000889874
PC11061_c0_g4	73.7978	0.161862	0.290552	0.557087	0.577468	0.725287
PC23078_c0_g1	7.07406	-3.26423	0.760754	-4.29078	1.78043e-05	0.000266218
PC11062_c0_g1	39.7285	0.24518	0.457858	0.535493	0.592309	0.737302
PC110626_c0_g1	3.06909	-0.413522	1.24506	-0.33213	0.739791	0.842477
PC11063_c0_g2	32.4447	-0.574195	0.324315	-1.77049	0.0766461	0.188859
PC25985_c0_g1	11.4138	-3.26379	0.676834	-4.82215	1.42021e-06	3.31513e-05
PC11065_c0_g2	7.68569	-0.045173	0.394417	-0.114531	0.908817	0.948955
PC13754_c0_g1	17.6939	-3.25429	0.483941	-6.72456	1.76118e-11	1.53072e-09
PC110662_c0_g1	20.6331	0.371353	2.07755	0.178746	0.858137	0.919981
PC11068_c0_g1	7.81928	0.757035	0.661268	1.14482	0.252282	0.424132
PC14976_c0_g1	8.66129	-3.24999	0.95279	-3.41103	0.000647182	0.00492831
PC11069_c1_g1	7.86449	-0.00763272	0.389918	-0.0195752	0.984382	0.991725
PC1107_c0_g1	7.81507	-0.138513	0.385359	-0.359439	0.719266	0.828966
PC11070_c0_g1	21.8291	0.703456	0.472577	1.48856	0.136605	0.281136
PC11070_c2_g1	19.9219	0.0844116	0.236118	0.357497	0.72072	0.830059
PC11070_c9_g1	4.32665	-0.374428	0.600991	-0.623017	0.533273	0.690011
PC11071_c0_g2	5.48552	0.151705	0.512118	0.29623	0.767054	0.860637
PC11072_c0_g3	18.0726	0.289488	0.672189	0.430665	0.666712	0.791932
PC11072_c0_g4	51.2521	-0.393256	0.216639	-1.81526	0.0694846	0.176405
PC11072_c0_g5	14.8136	0.433257	0.339409	1.27651	0.201776	0.365892
PC11072_c0_g6	14.9086	-0.544879	0.281697	-1.93427	0.0530794	0.145408
PC11073_c0_g1	7.41197	-0.410025	0.569027	-0.720572	0.471173	0.636209
PC110730_c0_g1	78.8306	1.63993	0.80419	2.03924	0.0414263	0.121601
PC11074_c0_g1	1254.3	0.0541836	0.170053	0.318628	0.750008	0.848957
PC11074_c0_g2	44.4654	-0.0944962	0.365297	-0.258683	0.79588	0.880758
PC31743_c0_g3	5.0434	-3.24565	0.827979	-3.91997	8.85616e-05	0.000988036
PC655_c0_g1	162.5	-3.24361	0.411335	-7.88558	3.13068e-15	4.89781e-13
PC22605_c0_g2	8.7272	-3.23834	0.902505	-3.58816	0.000333015	0.00288339
PC28915_c0_g1	4.12413	-3.23646	0.944366	-3.42713	0.000610003	0.0046978
PC11079_c0_g1	686.053	0.0209243	0.181443	0.115321	0.90819	0.948554
PC1108_c0_g1	2315.92	-0.0746292	0.121539	-0.614033	0.539193	0.694913
PC11081_c0_g1	5.86576	-0.44376	0.516775	-0.858709	0.390501	0.565101
PC11081_c0_g2	1.53212	-1.93638	1.38196	-1.40119	0.161158	0.313946
PC11081_c1_g1	19.4852	-0.165505	0.335683	-0.493039	0.621985	0.758351
PC11081_c2_g2	5.92686	-0.936	0.619253	-1.5115	0.130662	0.272781
PC11082_c0_g1	32.14	-0.11467	0.213008	-0.538338	0.590344	0.735601
PC11082_c0_g2	53.7651	0.12063	0.212148	0.568611	0.56962	0.719295
PC11083_c0_g1	71.2074	-0.748982	0.370727	-2.02031	0.0433517	0.125863
PC10225_c1_g3	5.26027	-3.23439	0.918559	-3.52115	0.000429675	0.00354113
PC18464_c0_g1	42.5401	-3.22978	0.34592	-9.33677	9.93215e-21	3.48618e-18
PC8494_c0_g2	8.48813	-3.22952	0.717199	-4.50296	6.70138e-06	0.000120072
PC110882_c0_g1	135.652	1.14798	0.852465	1.34666	0.17809	0.336028
PC217_c0_g2	1599.58	-3.22563	0.208197	-15.4932	3.85803e-54	7.04168e-51
PC1749_c1_g1	67.7101	-3.22363	0.440873	-7.31192	2.63351e-13	3.16229e-11
PC1109_c1_g1	679.031	0.113163	0.251409	0.450116	0.652627	0.782205
PC1109_c1_g2	161.649	0.106179	0.124044	0.855976	0.392011	0.566387
PC1109_c1_g3	210.511	-0.194707	0.124878	-1.55918	0.118954	0.255167
PC1109_c2_g1	80.6621	0.253972	0.242179	1.0487	0.294318	0.469734
PC15504_c0_g2	5.3643	-3.22229	0.918589	-3.50788	0.0004517	0.00368165
PC11090_c0_g1	59.0724	-0.799375	0.426713	-1.87333	0.0610226	0.160626
PC508_c6_g1	8.67912	-3.22215	0.896472	-3.59425	0.000325325	0.00283204
PC11092_c0_g1	22.225	-0.796142	0.40885	-1.94727	0.0515023	0.142226
PC11094_c0_g1	18.745	0.486178	0.556747	0.873247	0.382528	0.557067
PC11095_c0_g1	7.15597	0.436456	0.433816	1.00608	0.314375	0.490572
PC524_c0_g1	3457.55	-3.21721	0.243098	-13.2342	5.56917e-40	5.25768e-37
PC11098_c3_g1	11.9434	-0.529225	0.378665	-1.39761	0.162231	0.315357
PC11098_c4_g1	32.3227	1.00553	1.54705	0.649965	0.515715	0.674883
PC11099_c0_g1	50.852	-0.139286	0.239939	-0.580506	0.561574	0.712983
PC11099_c0_g3	7.27052	-0.906194	0.423498	-2.13978	0.0323724	0.101849
PC111_c0_g1	2215.17	-0.0467356	0.146719	-0.318537	0.750077	0.849
PC3333_c0_g4	8.75296	-3.21692	0.935884	-3.43731	0.00058752	0.00455215
PC35529_c0_g2	3.36979	-3.20135	1.02812	-3.1138	0.00184695	0.011358
PC11102_c0_g1	5.54147	-1.33378	0.628717	-2.12143	0.033886	0.105075
PC68727_c1_g1	4.18216	-3.20122	0.920578	-3.4774	0.000506298	0.00405186
PC11106_c0_g2	6.33261	0.182617	0.486275	0.375542	0.707258	0.820653
PC16773_c2_g1	1.95631	-3.1979	1.41309	-2.26305	0.0236328	0.0809684
PC11110_c0_g1	7.43094	-0.547492	0.452693	-1.20941	0.226505	0.395337
PC11110_c0_g2	119.428	0.00863118	0.30725	0.0280917	0.977589	0.987654
PC5202_c1_g1	4.3409	-3.19625	1.0678	-2.99329	0.00275988	0.0155473
PC11113_c0_g1	7.25999	-0.258821	0.499054	-0.518623	0.604024	0.745874
PC11115_c0_g1	8.43627	-0.130762	0.492964	-0.265258	0.790811	0.877866
PC21225_c0_g3	8.75964	-3.19557	0.683155	-4.67766	2.90166e-06	6.0504e-05
PC35748_c0_g1	95.6668	-3.1942	0.419094	-7.62167	2.5041e-14	3.49782e-12
PC11124_c1_g1	6.61446	1.33202	0.813871	1.63665	0.101705	0.229366
PC11125_c0_g1	18.6565	0.0107154	0.263241	0.0407054	0.967531	0.982187
PC18221_c3_g1	3.82715	-3.19293	0.979048	-3.26126	0.00110917	0.00756338
PC56922_c1_g1	16.1267	-3.1893	0.590414	-5.40179	6.59774e-08	2.37988e-06
PC11129_c0_g1	11.7636	0.584258	0.393907	1.48324	0.13801	0.283086
PC1113_c0_g1	20.0039	0.0514753	0.276006	0.186501	0.852052	0.916743
PC1113_c1_g1	70.0615	0.115865	0.232591	0.498148	0.61838	0.755973
PC9422_c0_g2	17.2378	-3.18726	0.507579	-6.27933	3.40028e-10	2.21649e-08
PC6121_c0_g1	101.975	-3.18561	0.446183	-7.13969	9.35429e-13	1.01226e-10
PC30483_c0_g1	10.5621	-3.17425	0.654742	-4.84809	1.24658e-06	2.96773e-05
PC11133_c0_g1	6776.97	-0.079423	0.301374	-0.263537	0.792137	0.878659
PC11137_c0_g1	9.06552	0.304212	0.375833	0.809434	0.418265	0.589943
PC11138_c0_g1	940.481	0.146466	0.30964	0.473022	0.636197	0.769103
PC18981_c0_g1	9.19196	-3.17159	0.995044	-3.18739	0.00143565	0.009292
PC11138_c1_g1	34.5178	-0.249632	0.218527	-1.14234	0.253314	0.425239
PC11139_c0_g1	5832.98	0.419108	0.349885	1.19784	0.230977	0.400538
PC11141_c1_g2	42.7683	0.205277	0.214088	0.958841	0.337639	0.514434
PC11143_c0_g1	23.5232	0.371905	0.228781	1.62559	0.104036	0.232857
PC11144_c0_g1	6.56897	-0.5253	0.511488	-1.027	0.304419	0.480337
PC11147_c0_g1	36.2166	-0.150251	0.391586	-0.383699	0.701202	0.816392
PC11147_c0_g2	59834.7	0.255771	0.37174	0.688038	0.491429	0.654195
PC11147_c0_g3	65077.7	-0.00270626	0.340432	-0.0079495	0.993657	0.996446
PC3325_c1_g2	15.5364	-3.16737	0.61685	-5.13475	2.8252e-07	8.40742e-06
PC11149_c0_g1	7061.07	0.136522	0.301004	0.453556	0.650149	0.780144
PC787_c0_g1	129.174	-3.16723	0.29429	-10.7623	5.18664e-27	3.15555e-24
PC11150_c0_g2	8.0699	0.457894	0.417885	1.09574	0.273192	0.447259
PC11150_c1_g1	3.69511	0.444996	1.09358	0.406916	0.684069	0.80428
PC21259_c0_g1	3.76652	-3.16685	1.03089	-3.07195	0.00212667	0.0126794
PC11153_c0_g1	22.4258	0.254218	0.228766	1.11126	0.266457	0.440151
PC85878_c0_g1	6.68871	-3.1653	0.820357	-3.85844	0.000114113	0.00121422
PC11154_c0_g1	43.4848	-0.178068	0.238209	-0.74753	0.454744	0.622561
PC11155_c0_g1	250.615	0.11079	0.175644	0.630764	0.528195	0.685711
PC11157_c0_g1	40.2853	0.321651	0.563935	0.570369	0.568427	0.718287
PC11158_c0_g1	16.3402	0.179189	0.396228	0.452237	0.651098	0.780933
PC11158_c0_g2	7.3323	-0.473249	0.565243	-0.837247	0.402453	0.575853
PC1116_c0_g1	65.4601	0.0588913	0.308094	0.191147	0.84841	0.914264
PC4184_c0_g1	1485.02	-3.16337	0.338485	-9.34566	9.13186e-21	3.24691e-18
PC11161_c1_g1	3.52605	-1.33704	1.57697	-0.847852	0.39652	0.570456
PC11161_c2_g1	94.2741	-0.334377	0.171114	-1.95412	0.0506873	0.140656
PC16203_c0_g1	2.91394	-3.16215	0.987694	-3.20154	0.00136693	0.00893381
PC111631_c0_g1	8.81897	0.457122	0.676801	0.675415	0.499412	0.66091
PC18168_c0_g1	4.30045	-3.15353	0.805302	-3.91596	9.00461e-05	0.00100011
PC11165_c0_g1	162.087	0.144404	0.465711	0.310071	0.756507	0.853666
PC11165_c1_g1	21.2036	-0.356168	0.4997	-0.712763	0.475992	0.640735
PC71134_c0_g1	5.85644	-3.15107	0.802784	-3.92518	8.66654e-05	0.000970439
PC11167_c0_g2	7.35993	0.23338	0.526708	0.443092	0.657699	0.785799
PC11167_c0_g3	6.29332	0.108218	0.712866	0.151806	0.87934	0.932466
PC15629_c0_g1	115.202	-3.14682	0.383579	-8.20385	2.32809e-16	4.27576e-14
PC111697_c0_g1	6.20655	-0.0159405	0.497181	-0.0320617	0.974423	0.986093
PC1117_c0_g1	608.626	-0.185653	0.0978386	-1.89754	0.0577566	0.154224
PC18288_c0_g1	29.5612	-3.14574	0.772987	-4.06958	4.70971e-05	0.000589586
PC11171_c0_g1	16.9723	0.664474	0.912842	0.727918	0.466664	0.63221
PC11172_c0_g1	13.0108	0.22059	0.376074	0.586562	0.557498	0.709667
PC11173_c0_g1	119.486	-0.197401	0.251003	-0.78645	0.431604	0.602054
PC11175_c0_g1	420.769	0.419391	0.206103	2.03486	0.0418648	0.122573
PC11176_c0_g1	413.066	0.0349155	0.311173	0.112206	0.91066	0.950263
PC11177_c0_g1	125.387	-0.166825	0.259795	-0.64214	0.520782	0.679205
PC11752_c0_g1	15.1902	-3.14528	0.512837	-6.13311	8.61755e-10	5.11782e-08
PC111788_c0_g1	10.4969	-0.0962508	0.373237	-0.257881	0.796498	0.881179
PC36290_c0_g1	5.30732	-3.1452	0.940046	-3.34579	0.000820486	0.00592855
PC1118_c0_g1	1424.54	0.0929477	0.181394	0.512408	0.608366	0.748992
PC28844_c0_g1	5.71269	-3.14294	0.909321	-3.45636	0.000547532	0.00430757
PC11183_c0_g2	28.3818	-0.30406	0.623756	-0.487466	0.625928	0.76146
PC111859_c0_g1	3.08781	-1.5505	0.999025	-1.55202	0.120658	0.25761
PC363_c0_g2	7.42743	-3.14276	0.911295	-3.44867	0.000563348	0.00440541
PC111881_c0_g1	4.8645	2.21306	1.46292	1.51277	0.130338	0.272272
PC11189_c0_g1	23.4707	0.821399	0.562469	1.46034	0.144195	0.291942
PC14547_c0_g2	6.51423	-3.1399	0.949882	-3.30556	0.000947858	0.00664544
PC11196_c0_g1	3.64647	-1.21209	1.46273	-0.828648	0.407304	0.580397
PC11197_c0_g1	57.4434	0.242047	0.185079	1.30781	0.190939	0.352807
PC112_c0_g1	9641.33	-0.120471	0.140695	-0.856254	0.391857	0.566345
PC1120_c0_g1	930.323	-0.0337046	0.192319	-0.175254	0.86088	0.921679
PC11202_c0_g1	194.863	0.242298	0.349484	0.693301	0.488121	0.65142
PC11206_c0_g1	179.327	-0.147748	0.161834	-0.912958	0.361265	0.536586
PC11207_c0_g1	56.0928	-0.31715	0.35327	-0.897757	0.369315	0.544135
PC112078_c0_g1	3.03421	-0.23153	0.835075	-0.277257	0.781583	0.871474
PC11209_c0_g1	330.45	0.307335	0.205692	1.49415	0.135136	0.278849
PC11209_c1_g1	39.2932	-0.3864	0.290692	-1.32924	0.183769	0.343522
PC1121_c0_g1	297.607	0.0109558	0.147693	0.0741791	0.940868	0.967807
PC72136_c0_g1	3.38859	-3.13894	1.03591	-3.03012	0.00244456	0.0141645
PC9426_c0_g1	10.7377	-3.13827	0.904226	-3.47067	0.000519161	0.00413547
PC69627_c0_g1	2.43451	-3.13755	1.19204	-2.63209	0.00848614	0.0376972
PC11213_c0_g1	11.2111	0.00134967	0.535222	0.00252171	0.997988	0.998608
PC850_c9_g1	13.9237	-3.13057	0.543976	-5.75498	8.66498e-09	4.13292e-07
PC11215_c0_g3	5.7387	0.123809	0.531356	0.233006	0.815757	0.893643
PC11217_c1_g1	7.47795	-0.74608	0.545005	-1.36894	0.171018	0.327043
PC11217_c2_g1	8.293	0.73907	0.707405	1.04476	0.296133	0.471807
PC11217_c2_g2	16.0917	-0.730678	0.390009	-1.87349	0.0610006	0.160584
PC5003_c2_g1	8.37982	-3.12976	0.625497	-5.00363	5.62619e-07	1.49258e-05
PC1122_c0_g1	66.1031	-0.0507598	0.269708	-0.188203	0.850718	0.915849
PC1122_c0_g2	1277.11	1.25254	0.681611	1.83761	0.0661193	0.170037
PC14517_c0_g3	4.03431	-3.12886	0.985485	-3.17495	0.00149865	0.00961791
PC511_c3_g4	13.8785	-3.12872	0.556018	-5.62702	1.83355e-08	8.03146e-07
PC11225_c0_g1	399.779	0.166303	0.154385	1.07719	0.281393	0.4561
PC11226_c0_g1	19.5733	-0.849796	0.417137	-2.03721	0.0416291	0.122065
PC11228_c0_g1	39.2118	-0.0180903	0.237374	-0.0762101	0.939252	0.967119
PC11229_c0_g1	28.6183	-0.283656	0.390549	-0.7263	0.467655	0.632976
PC1123_c0_g1	91569	0.301361	0.336585	0.895348	0.370601	0.545295
PC1123_c0_g2	14092.8	0.404861	0.352678	1.14796	0.250985	0.422661
PC1123_c0_g3	828.646	-0.382254	0.820273	-0.466009	0.641209	0.772805
PC1123_c0_g4	462.21	0.316395	0.507567	0.623356	0.53305	0.689789
PC11230_c0_g1	10.3822	-1.09734	0.570647	-1.92298	0.0544831	0.148098
PC21739_c0_g4	7.6489	-3.1284	0.639278	-4.89364	9.89869e-07	2.41162e-05
PC112376_c0_g1	5.1916	-0.439381	0.573999	-0.765473	0.44399	0.612679
PC11238_c0_g1	490.317	-0.0294123	0.276651	-0.106316	0.915332	0.953213
PC11239_c0_g1	31.8179	-0.478004	0.243717	-1.9613	0.0498436	0.13885
PC1124_c0_g2	122.575	0.340633	0.223808	1.52199	0.128012	0.268928
PC38106_c0_g1	5.9237	-3.12457	0.877069	-3.56252	0.000367315	0.00312212
PC1124_c2_g1	26.636	-0.552441	0.264339	-2.08989	0.0366275	0.111014
PC11242_c0_g1	24.6379	0.191754	0.353794	0.541992	0.587824	0.733655
PC30876_c0_g1	246.395	-3.1171	0.241046	-12.9315	2.98812e-38	2.72696e-35
PC12669_c0_g2	3.73907	-3.11703	1.10535	-2.81994	0.00480333	0.0241472
PC5637_c0_g1	33.223	-3.11135	0.402065	-7.73842	1.00661e-14	1.48166e-12
PC11254_c0_g3	6.8307	-0.78707	0.669922	-1.17487	0.240047	0.410923
PC11255_c0_g1	14.3944	-1.00895	0.688341	-1.46577	0.142712	0.289751
PC11255_c0_g2	1007.04	0.947064	0.702031	1.34904	0.177326	0.335046
PC11256_c0_g1	36.2792	-0.590189	0.365362	-1.61535	0.106234	0.236154
PC11257_c0_g1	8.03848	-0.179974	0.513875	-0.35023	0.726166	0.833619
PC1997_c0_g1	35.647	-3.10943	0.396198	-7.84817	4.22164e-15	6.49325e-13
PC1126_c0_g1	600.554	-0.0780651	0.169478	-0.460621	0.64507	0.776143
PC11261_c0_g1	1205.72	0.23396	0.160837	1.45464	0.145768	0.293962
PC11263_c0_g1	93.6941	-0.0746476	0.722368	-0.103337	0.917695	0.954548
PC11263_c1_g1	17.3457	0.390679	0.652806	0.598461	0.549532	0.70363
PC11265_c0_g1	14124.2	0.309912	0.318449	0.973193	0.330458	0.507077
PC71358_c0_g1	4.26055	-3.10769	0.860772	-3.61035	0.000305782	0.00270055
PC11896_c2_g1	5.63906	-3.10653	0.824257	-3.76888	0.000163981	0.00162839
PC11267_c0_g1	5.65731	-1.08717	0.628215	-1.73057	0.0835277	0.200405
PC11267_c1_g1	18.786	-0.607231	0.457306	-1.32784	0.18423	0.344125
PC11268_c0_g1	23.0468	0.175758	0.415039	0.423473	0.67195	0.795772
PC37115_c0_g2	4.49532	-3.10168	0.920472	-3.36966	0.000752615	0.00555693
PC15628_c0_g1	24.1042	-3.10045	0.684525	-4.52934	5.91679e-06	0.000108602
PC26040_c1_g1	2.1818	-3.09493	1.366	-2.26568	0.0234707	0.0805844
PC11272_c0_g1	56.5295	0.0993674	0.175282	0.5669	0.570782	0.720261
PC11272_c0_g3	11.7508	-0.312642	0.458539	-0.681823	0.495351	0.657735
PC11273_c2_g1	6.50433	-0.596079	0.666149	-0.894813	0.370887	0.545527
PC24250_c0_g1	5.09954	-3.09265	0.864356	-3.57798	0.000346255	0.00297451
PC11276_c1_g1	98.1177	0.542196	0.425633	1.27386	0.202714	0.367223
PC11277_c0_g1	31.8187	0.13288	0.274776	0.483594	0.628674	0.763511
PC32368_c1_g1	3.78523	-3.09026	0.924647	-3.3421	0.000831486	0.00598434
PC11277_c1_g2	27.0127	-0.904148	0.493325	-1.83276	0.0668382	0.171403
PC11278_c0_g1	21.3013	-1.37549	0.650738	-2.11374	0.0345374	0.106494
PC42119_c2_g1	6.41906	-3.08755	0.778217	-3.96746	7.26417e-05	0.000837556
PC1128_c0_g1	4754.13	-0.565184	0.616246	-0.91714	0.35907	0.534621
PC11281_c0_g3	19.9556	0.573324	0.380625	1.50627	0.131998	0.274498
PC11282_c0_g2	28.9544	-0.355654	0.276588	-1.28586	0.198492	0.361877
PC11282_c1_g1	9.21289	-0.173181	0.482826	-0.358682	0.719833	0.829444
PC11286_c0_g1	81.1797	-0.228212	0.617803	-0.369393	0.711835	0.823903
PC11287_c0_g1	87.9314	0.191117	0.214979	0.889003	0.374002	0.548707
PC11288_c0_g1	531.335	-0.0713288	0.327174	-0.218015	0.827417	0.901685
PC11289_c0_g2	12.6715	0.236462	0.368199	0.642212	0.520736	0.679194
PC1129_c0_g1	260.222	0.217975	0.140394	1.55259	0.12052	0.257459
PC37838_c1_g2	7.85776	-3.0804	0.67759	-4.54611	5.46469e-06	0.000101708
PC70863_c0_g1	4.78694	-3.07084	0.999937	-3.07103	0.0021332	0.0127018
PC15237_c0_g1	13.7094	-3.07071	0.839237	-3.65893	0.000253273	0.00231905
PC39141_c0_g1	16.5831	-3.06633	0.562024	-5.45587	4.87331e-08	1.8403e-06
PC11296_c0_g1	2051.09	0.150679	0.193741	0.777733	0.436726	0.606569
PC2445_c2_g1	5.19698	-3.05894	0.864762	-3.53733	0.000404201	0.00336768
PC11298_c0_g1	11.7361	0.175703	0.617193	0.284681	0.775888	0.867421
PC11298_c1_g1	37.5575	-0.680886	0.431285	-1.57874	0.114396	0.248211
PC12334_c1_g1	3.49928	-3.05893	0.93479	-3.27232	0.00106668	0.00733208
PC113_c0_g1	177.591	0.0525713	0.218428	0.24068	0.809803	0.889536
PC12045_c0_g1	3.24469	-3.05819	1.02449	-2.98509	0.00283496	0.0158788
PC113_c0_g4	25.031	-0.0992936	0.561918	-0.176705	0.85974	0.920842
PC113_c0_g5	29.1626	0.242414	0.297745	0.814167	0.415549	0.587625
PC1130_c0_g1	644.941	0.579925	0.412153	1.40706	0.159408	0.311379
PC11300_c0_g1	9.6081	0.320248	0.414737	0.772171	0.440013	0.609017
PC30770_c1_g1	9.19363	-3.05766	0.639045	-4.78474	1.71207e-06	3.87061e-05
PC11303_c1_g1	3.89539	-0.457571	0.587346	-0.779049	0.435951	0.605831
PC9437_c0_g2	128.721	-3.05591	0.54341	-5.62358	1.87036e-08	8.15392e-07
PC19186_c1_g1	4.21137	-3.05502	1.04028	-2.93673	0.00331698	0.0179969
PC37558_c1_g1	3.15212	-3.05237	0.883465	-3.455	0.000550302	0.00432563
PC11308_c3_g2	3.40962	0.868021	2.44619	0.354846	0.722705	0.831419
PC24883_c0_g1	9.79929	-3.05216	0.699629	-4.36255	1.28557e-05	0.000204511
PC11309_c1_g1	33.7659	0.721598	0.749376	0.962931	0.335582	0.512328
PC42830_c0_g1	3.26714	-3.05014	1.10468	-2.76111	0.00576047	0.0278795
PC31125_c1_g3	5.48274	-3.04883	0.963737	-3.16355	0.00155859	0.00992013
PC8559_c2_g1	5.94851	-3.04757	0.798179	-3.81815	0.000134454	0.00138491
PC11312_c0_g1	18.619	0.241103	0.427678	0.563747	0.572926	0.721727
PC11313_c0_g1	5.16066	-0.633043	0.52673	-1.20183	0.229428	0.398659
PC11313_c1_g1	10.4666	-0.486366	0.499285	-0.974125	0.329995	0.506509
PC11313_c3_g1	8.72051	0.638254	0.432584	1.47544	0.140093	0.286027
PC11315_c0_g1	109.521	0.55253	0.275478	2.00571	0.044887	0.129007
PC11315_c0_g2	24.3191	-0.444164	0.304413	-1.45909	0.144542	0.292416
PC14618_c0_g2	5.51288	-3.04638	0.957943	-3.18013	0.00147209	0.00946746
PC11317_c1_g1	3.9988	-0.910038	0.697439	-1.30483	0.191951	0.353889
PC10070_c0_g1	27.3996	-3.04393	0.42247	-7.20508	5.80101e-13	6.59005e-11
PC11317_c4_g1	4.72803	0.0756752	0.612821	0.123487	0.901722	0.945006
PC5366_c1_g1	244.484	-3.0435	0.276481	-11.008	3.49702e-28	2.39353e-25
PC11318_c0_g3	29.9709	-0.67114	0.353491	-1.89861	0.0576161	0.153924
PC11319_c0_g1	338.73	0.237924	0.133294	1.78495	0.0742693	0.184765
PC1132_c0_g1	19.572	-0.125751	0.524654	-0.239685	0.810575	0.890086
PC18578_c1_g1	10.1134	-3.0429	0.580399	-5.24278	1.58175e-07	5.12488e-06
PC11321_c0_g1	90.456	-0.398167	0.256558	-1.55196	0.120673	0.25761
PC666_c15_g1	832.867	-3.04286	0.191179	-15.9163	4.88409e-57	1.11431e-53
PC11325_c0_g1	3.17175	-0.33513	1.0172	-0.329465	0.741804	0.843717
PC11326_c0_g1	95.7845	0.236798	0.219099	1.08078	0.279794	0.45413
PC11327_c0_g1	16.4146	-0.166346	0.442849	-0.375628	0.707193	0.820641
PC11328_c0_g1	260.129	0.638551	0.416976	1.53138	0.125674	0.265119
PC11329_c0_g2	27.4556	0.351408	0.456463	0.769849	0.441389	0.610198
PC1133_c0_g1	1398.28	0.321521	0.317644	1.0122	0.311441	0.487744
PC20871_c1_g2	3.78149	-3.04266	0.942894	-3.22694	0.0012512	0.00833969
PC23927_c0_g1	15.5898	-3.03598	0.475337	-6.387	1.6917e-10	1.18757e-08
PC11331_c1_g1	24.5855	-0.587975	0.319416	-1.84078	0.0656542	0.169095
PC11331_c1_g4	24.2709	0.326052	0.263528	1.23726	0.215992	0.383342
PC11332_c0_g1	14.9158	-0.608128	0.355452	-1.71086	0.0871068	0.20606
PC11333_c0_g1	16.4767	-0.694167	0.744623	-0.932239	0.351213	0.527397
PC11334_c2_g1	5.79191	-0.206104	0.872218	-0.236298	0.813201	0.891853
PC27642_c1_g2	20.1102	-3.03566	0.431594	-7.03361	2.01254e-12	2.11109e-10
PC11334_c3_g2	7.58961	0.160088	0.436052	0.36713	0.713522	0.825019
PC11335_c0_g1	18.2897	-0.47524	0.262887	-1.80777	0.070642	0.178565
PC11337_c0_g1	21.9546	0.288688	0.277934	1.03869	0.298947	0.474535
PC11337_c0_g2	221.017	-0.246183	0.878433	-0.280253	0.779284	0.869857
PC11338_c0_g1	56.4371	0.149906	0.40412	0.370944	0.710679	0.823193
PC11339_c0_g1	14.7769	-0.345754	0.36648	-0.943444	0.345454	0.52161
PC1134_c0_g1	1218.08	0.397704	0.25375	1.56731	0.117043	0.252374
PC11341_c0_g1	7.897	1.45044	0.68622	2.11366	0.0345439	0.106503
PC11341_c1_g1	59.7455	-0.140593	0.211761	-0.663922	0.50674	0.666932
PC11342_c0_g1	166.071	0.102382	0.111587	0.917506	0.358878	0.534507
PC11342_c1_g3	6.8355	-0.447805	0.527635	-0.848703	0.396046	0.570022
PC65588_c0_g2	3.31991	-3.03293	1.03219	-2.93836	0.00329957	0.0179248
PC11343_c0_g1	27.3745	0.0158624	0.24487	0.0647788	0.94835	0.97116
PC28153_c0_g2	7.50421	-3.02796	0.763074	-3.96811	7.24444e-05	0.000835812
PC59597_c0_g1	21.2175	-3.02698	0.520263	-5.81818	5.94919e-09	2.93472e-07
PC11346_c0_g1	43.5729	-0.463379	0.304477	-1.52189	0.128038	0.268944
PC11347_c0_g1	27.2202	-0.709136	0.333498	-2.12636	0.0334734	0.104152
PC11347_c1_g1	41.5979	-0.0394009	0.505867	-0.0778878	0.937917	0.966621
PC12759_c0_g1	4.3999	-3.02448	0.851979	-3.54995	0.000385304	0.00323882
PC11349_c0_g1	15.4949	0.468695	0.516416	0.907592	0.364094	0.539432
PC1135_c0_g1	159.819	-0.223288	0.180897	-1.23434	0.217077	0.384523
PC1135_c0_g2	18.9724	0.0249157	0.306418	0.0813126	0.935193	0.964957
PC1135_c1_g1	141.238	-0.06683	0.181746	-0.367711	0.713089	0.82476
PC1135_c2_g2	17.1347	0.286896	0.281015	1.02093	0.307289	0.483442
PC11350_c0_g1	4.31681	0.761809	0.686705	1.10937	0.267271	0.441069
PC11350_c0_g2	6.44173	-0.753122	1.92999	-0.390221	0.696373	0.813124
PC14994_c0_g3	152.875	-3.02423	0.48582	-6.22499	4.8158e-10	3.02401e-08
PC19783_c0_g1	5.36402	-3.02326	0.796744	-3.79451	0.000147933	0.00149505
PC1494_c1_g1	5.19788	-3.02236	0.826035	-3.65888	0.000253322	0.00231905
PC11353_c0_g1	34.9619	0.714847	1.04589	0.683485	0.494301	0.656965
PC13230_c0_g1	43.3702	-3.01853	0.590155	-5.11482	3.14046e-07	9.21538e-06
PC11355_c0_g1	21.731	-1.09234	0.51103	-2.13753	0.032555	0.102164
PC11355_c0_g2	37.4731	0.381569	0.223591	1.70655	0.0879061	0.207441
PC11355_c0_g3	21.4288	-0.159906	0.338213	-0.472798	0.636358	0.769192
PC11355_c0_g4	72.1167	-0.289217	0.174785	-1.65471	0.097984	0.22383
PC11355_c0_g5	5.71759	-0.286021	0.679636	-0.420844	0.673869	0.797148
PC11357_c0_g1	14.1499	0.454527	0.48959	0.928384	0.353208	0.529178
PC11357_c1_g1	26.368	0.00526565	0.37309	0.0141136	0.988739	0.993967
PC16779_c0_g1	4.34377	-3.01796	1.19312	-2.52947	0.0114234	0.0470358
PC11359_c0_g1	4.80892	-0.458803	0.65773	-0.697555	0.485456	0.648934
PC1136_c0_g2	1075.44	0.240494	0.255576	0.940989	0.346711	0.522845
PC1136_c1_g1	143.357	0.341976	0.171128	1.99837	0.0456771	0.130701
PC1136_c3_g1	14977.8	-0.29844	0.203337	-1.46772	0.142181	0.289158
PC11360_c0_g1	245.768	0.399758	0.225183	1.77526	0.0758552	0.187433
PC11360_c1_g1	185.99	0.00787083	0.171856	0.0457991	0.96347	0.97992
PC11360_c4_g1	16.2171	0.476346	0.371464	1.28235	0.199721	0.363379
PC11361_c0_g1	18.0257	-0.138145	0.478743	-0.288557	0.77292	0.865163
PC11362_c0_g1	474.066	0.334644	0.192189	1.74122	0.0816445	0.197374
PC11363_c0_g1	46.8493	0.844225	0.408897	2.06464	0.0389573	0.116071
PC11363_c1_g1	6.14685	-0.92366	0.522856	-1.76657	0.0773008	0.190011
PC11641_c0_g1	4.61333	-3.01504	0.838093	-3.59751	0.000321281	0.00280754
PC11364_c1_g1	10.6017	0.47344	0.587904	0.805301	0.420646	0.592262
PC11366_c0_g1	3269.27	0.325304	0.521112	0.62425	0.532464	0.689306
PC11367_c0_g1	189.621	-0.182438	0.110763	-1.6471	0.0995381	0.22606
PC120758_c0_g1	6.79001	-3.0126	1.03971	-2.89753	0.00376114	0.0199443
PC11369_c1_g1	6.09733	-1.22703	0.600653	-2.04283	0.0410689	0.120775
PC54658_c0_g1	4.55549	-3.01025	0.906244	-3.32168	0.000894781	0.00634645
PC11371_c0_g1	25.46	-0.196307	0.288843	-0.679632	0.496737	0.658867
PC28508_c0_g1	5.66945	-3.00566	0.825988	-3.63887	0.000273834	0.00246694
PC14293_c3_g1	5.11527	-3.0028	0.836628	-3.58916	0.00033174	0.0028769
PC32825_c0_g3	4.52301	-2.9979	0.880465	-3.4049	0.000661875	0.00501367
PC11375_c1_g4	82.0016	0.212913	0.46587	0.457022	0.647655	0.778175
PC11377_c2_g1	26.0624	-0.524205	0.366958	-1.42852	0.153143	0.303098
PC11379_c0_g1	360.396	-0.030938	0.12425	-0.248998	0.803362	0.885909
PC34988_c0_g2	9.81489	-2.99775	0.699851	-4.28341	1.84053e-05	0.000274008
PC1138_c0_g1	232.787	-0.00720394	0.108703	-0.0662717	0.947162	0.970761
PC11380_c0_g1	116.125	0.278211	0.437414	0.636036	0.524753	0.682795
PC11384_c0_g1	47.2308	0.404732	0.592157	0.683488	0.494299	0.656965
PC9544_c0_g2	8.45073	-2.99579	0.706939	-4.23769	2.25834e-05	0.000324902
PC11387_c0_g1	49.9333	0.721021	0.422804	1.70533	0.0881324	0.207779
PC11388_c1_g2	15.717	-0.502737	0.343395	-1.46402	0.143189	0.29051
PC10311_c0_g1	3.41406	-2.99155	0.965936	-3.09704	0.00195462	0.0118761
PC11389_c0_g2	32.4046	-0.00524165	0.318852	-0.0164392	0.986884	0.992946
PC1139_c0_g1	103.303	0.304682	0.158105	1.92709	0.0539683	0.147151
PC1139_c1_g1	35.3169	-0.039898	0.697083	-0.0572357	0.954357	0.974977
PC1139_c1_g2	7.59975	-0.595449	0.469095	-1.26936	0.204314	0.369387
PC1139_c2_g1	2.82492	-1.52579	0.916496	-1.66481	0.0959506	0.220464
PC1139_c3_g1	4.77251	-1.11661	0.620808	-1.79864	0.072076	0.181052
PC11390_c0_g1	1877.11	0.770773	0.384937	2.00234	0.0452485	0.12976
PC11392_c0_g2	47.2244	-0.876734	0.9411	-0.931605	0.351541	0.52765
PC7646_c1_g1	6.28207	-2.99118	0.811561	-3.68572	0.000228061	0.00213465
PC11396_c0_g1	8.27203	0.543748	0.364824	1.49044	0.136109	0.280411
PC7316_c1_g1	8.02875	-2.99091	0.686378	-4.35753	1.3154e-05	0.000208288
PC5721_c1_g1	14.808	-2.99069	0.604418	-4.94806	7.49574e-07	1.89841e-05
PC114_c0_g1	111.726	0.799787	0.484239	1.65164	0.0986085	0.224657
PC31020_c1_g1	19.6891	-2.98516	0.469147	-6.36295	1.97912e-10	1.34787e-08
PC1140_c1_g1	58.7074	0.0390512	0.345075	0.113167	0.909898	0.949753
PC1140_c11_g1	581.848	0.734396	0.746158	0.984236	0.324999	0.501399
PC23515_c0_g3	2.81788	-2.98289	1.15328	-2.58645	0.00969689	0.0417938
PC25809_c0_g2	3.8689	-2.98178	0.964429	-3.09175	0.00198977	0.0120522
PC9409_c0_g1	197.803	-2.98036	0.494458	-6.02753	1.66483e-09	9.35929e-08
PC1140_c17_g1	8.81407	-0.196317	0.400555	-0.490112	0.624055	0.759924
PC1140_c19_g2	73.8324	-0.446217	0.261505	-1.70634	0.0879441	0.207474
PC11463_c2_g2	3.79626	-2.97962	0.932182	-3.19639	0.0013916	0.00906262
PC41702_c0_g2	2.28138	-2.97793	1.25885	-2.3656	0.0180009	0.066151
PC22877_c0_g2	6.11062	-2.97638	0.767964	-3.87568	0.000106326	0.00114832
PC43288_c0_g1	7.0067	-2.97523	0.686026	-4.3369	1.44506e-05	0.000225816
PC1140_c4_g1	662.651	0.455429	0.451168	1.00944	0.312762	0.489001
PC1140_c6_g1	211.944	0.0856665	0.135497	0.632237	0.527232	0.684956
PC1140_c7_g1	81.9955	-0.47896	0.243478	-1.96716	0.0491645	0.13742
PC1140_c8_g1	74.2171	-0.127283	0.214011	-0.594748	0.552012	0.705339
PC1140_c9_g1	685.177	0.272146	0.183905	1.47981	0.138923	0.284476
PC11400_c0_g1	5.27613	0.141512	0.665184	0.212741	0.831529	0.903827
PC1834_c0_g2	19.3483	-2.97488	0.626573	-4.74785	2.05588e-06	4.50648e-05
PC11401_c0_g2	35.9892	-0.241945	0.226773	-1.0669	0.286016	0.460809
PC11401_c2_g1	5.21382	-1.16393	1.08894	-1.06886	0.285132	0.459818
PC33848_c0_g1	16.4761	-2.97004	0.797796	-3.72281	0.000197018	0.00189995
PC11404_c0_g1	7.09765	-0.792259	0.647587	-1.2234	0.221178	0.38939
PC11405_c0_g1	19.8465	0.305261	0.352006	0.867204	0.38583	0.560444
PC35489_c0_g2	48.8429	-2.96945	0.435966	-6.8112	9.67865e-12	8.9521e-10
PC11406_c0_g1	8.6476	-0.39683	0.47282	-0.839284	0.40131	0.574848
PC96586_c0_g1	2.84487	-2.96599	1.02674	-2.88874	0.00386784	0.0204192
PC11407_c1_g1	23.8131	-0.625038	0.520209	-1.20151	0.229552	0.398791
PC11408_c0_g1	54.1541	1.18509	0.566813	2.0908	0.0365462	0.110851
PC11409_c0_g3	4.96943	-0.237767	0.855307	-0.277991	0.781019	0.87113
PC27831_c0_g1	10.0957	-2.96003	0.597168	-4.95678	7.16702e-07	1.83273e-05
PC11414_c0_g1	56.0173	-0.0881869	0.240331	-0.36694	0.713664	0.825064
PC11415_c0_g2	5.08662	-0.637404	0.737388	-0.864408	0.387364	0.56172
PC11415_c0_g3	7.36644	-0.189022	0.455522	-0.414957	0.678174	0.800441
PC46019_c0_g1	4.49004	-2.95982	0.850176	-3.48142	0.000498762	0.00400348
PC105287_c0_g1	22.7082	-2.95869	0.400812	-7.38175	1.56222e-13	1.91796e-11
PC11419_c0_g1	88.9621	-0.445101	0.277193	-1.60575	0.10833	0.23922
PC4797_c1_g1	14.3164	-2.95836	0.544396	-5.43419	5.50446e-08	2.03101e-06
PC23177_c0_g1	7.46024	-2.95787	0.615469	-4.80588	1.54076e-06	3.5445e-05
PC11421_c0_g1	19.1982	0.161112	0.3209	0.502063	0.615623	0.753949
PC11422_c0_g1	67.0642	0.382296	0.184001	2.07768	0.0377386	0.113427
PC11425_c0_g1	29.5882	-0.0253824	0.264018	-0.096139	0.92341	0.957872
PC11427_c0_g1	107.557	0.187354	0.231286	0.810054	0.417909	0.589871
PC11427_c1_g1	49.9843	-0.466643	0.552223	-0.845025	0.398097	0.571951
PC11428_c0_g1	6.87284	-0.572796	0.432039	-1.3258	0.184907	0.344919
PC11429_c0_g1	54.6868	-0.0979436	0.259468	-0.377478	0.705818	0.819643
PC1143_c0_g1	143.86	0.175859	0.171407	1.02598	0.304902	0.480935
PC15528_c1_g1	3.8116	-2.95066	0.818371	-3.60553	0.000311517	0.00273707
PC34531_c0_g1	8.1485	-2.94656	0.743025	-3.96563	7.32038e-05	0.000843153
PC11435_c1_g1	4.30557	-0.815501	0.532583	-1.53122	0.125715	0.265164
PC6740_c0_g2	7.91761	-2.94585	0.571005	-5.15906	2.4819e-07	7.52487e-06
PC15713_c2_g1	3.62476	-2.94423	0.927174	-3.17549	0.00149586	0.00960675
PC11437_c0_g1	7.17065	-0.246633	0.430536	-0.57285	0.566746	0.716957
PC114377_c0_g1	7.05896	1.0865	1.1297	0.961753	0.336173	0.512801
PC16547_c0_g1	6.04361	-2.9372	0.998587	-2.94136	0.00326779	0.0177945
PC11439_c0_g1	28.2512	-0.543366	0.359356	-1.51206	0.130519	0.272609
PC1144_c0_g1	87.8623	-0.0259551	0.25948	-0.100027	0.920323	0.955792
PC11443_c0_g4	12.1728	-0.279149	0.419343	-0.665682	0.505614	0.666045
PC11444_c0_g1	6.84637	-1.17603	0.761946	-1.54346	0.12272	0.260857
PC11447_c0_g1	1047.92	0.218553	0.104362	2.09419	0.0362435	0.110155
PC11448_c1_g1	18.4316	-0.227627	0.364927	-0.623761	0.532785	0.689608
PC11448_c1_g2	7.71198	-0.641397	0.472003	-1.35888	0.174184	0.330871
PC22685_c1_g1	4.32706	-2.93638	0.760661	-3.8603	0.000113249	0.0012069
PC34602_c0_g3	13.3933	-2.93538	0.898694	-3.26627	0.00108974	0.00745873
PC31895_c0_g1	5.34856	-2.93352	0.754967	-3.88562	0.000102067	0.00110801
PC11450_c0_g2	5.83078	-0.562351	0.581828	-0.966524	0.333782	0.510497
PC11452_c0_g1	27.4236	0.269999	0.434185	0.621852	0.534039	0.690839
PC11453_c0_g1	16.4561	-0.575017	0.288852	-1.9907	0.0465139	0.132427
PC11454_c0_g1	13.9609	-0.55469	0.393905	-1.40818	0.159077	0.310976
PC35649_c0_g2	21.6866	-2.93289	0.405267	-7.23695	4.58889e-13	5.32351e-11
PC11454_c0_g3	15.3417	-0.673995	0.631939	-1.06655	0.286175	0.460881
PC11454_c1_g1	16.1648	-0.556954	0.322817	-1.7253	0.0844743	0.201878
PC17962_c0_g1	13.139	-2.92966	0.688023	-4.25809	2.06184e-05	0.000301383
PC36291_c0_g1	2.08706	-2.92607	1.15606	-2.53107	0.0113714	0.0469361
PC1146_c1_g1	72.2063	0.137368	0.143991	0.954003	0.340082	0.516748
PC1146_c12_g1	14.5028	-0.0629648	0.326792	-0.192676	0.847213	0.913607
PC1146_c2_g1	150.857	0.241312	0.163876	1.47253	0.140879	0.287277
PC1146_c3_g1	28.7334	0.311012	0.23105	1.34608	0.178277	0.336194
PC11460_c0_g1	33.1251	-0.0211694	0.406198	-0.052116	0.958436	0.977152
PC8862_c0_g2	6.61943	-2.9259	0.764051	-3.82945	0.000128427	0.00133387
PC6115_c0_g1	4.50521	-2.92173	0.879548	-3.32185	0.000894213	0.00634645
PC11464_c0_g1	31.8389	0.184595	0.218537	0.844688	0.398285	0.572041
PC11464_c0_g2	71.1523	-0.307966	0.182816	-1.68457	0.092072	0.214113
PC11464_c1_g1	123.875	-0.199311	0.239903	-0.830799	0.406087	0.579209
PC11465_c0_g1	94.8503	0.105804	0.132568	0.798113	0.424805	0.596258
PC11469_c0_g1	7337.55	0.201016	0.101918	1.97234	0.0485712	0.13643
PC11469_c3_g1	5.13568	-0.248599	0.597685	-0.415936	0.677457	0.799802
PC28745_c1_g2	4.70992	-2.91704	0.869146	-3.35621	0.000790183	0.0057619
PC1147_c15_g1	20.5615	0.479968	0.302481	1.58677	0.112565	0.245641
PC2097_c0_g4	345.129	-2.91553	0.458041	-6.36522	1.95006e-10	1.33472e-08
PC1147_c2_g1	8.72503	0.205881	0.505714	0.407108	0.683928	0.804159
PC1147_c4_g1	446.138	0.27242	0.247992	1.0985	0.271984	0.445892
PC1147_c49_g1	1074.26	0.0407324	0.247115	0.164832	0.869076	0.926764
PC1147_c9_g1	16.2894	-0.041814	0.255728	-0.16351	0.870117	0.927253
PC1147_c9_g2	72.8479	-0.1787	0.177965	-1.00413	0.315318	0.491364
PC11470_c0_g1	258.337	0.238259	0.163375	1.45836	0.14474	0.292602
PC11473_c1_g1	12.1181	0.0589469	0.355655	0.165741	0.86836	0.926211
PC9437_c0_g3	89.0181	-2.91395	0.517874	-5.62675	1.8364e-08	8.03146e-07
PC11475_c0_g1	115.378	0.911917	0.466078	1.95658	0.0503973	0.140079
PC11476_c0_g1	1203.97	-0.144315	0.318599	-0.452969	0.650571	0.780454
PC3118_c0_g1	35.5437	-2.9126	0.407266	-7.15161	8.57674e-13	9.35514e-11
PC11478_c0_g1	32.35	-0.718154	0.573509	-1.25221	0.210493	0.376741
PC38985_c0_g2	6.9465	-2.90879	0.667421	-4.35825	1.31105e-05	0.000207961
PC22838_c0_g1	5.08173	-2.90826	0.871784	-3.33598	0.000849985	0.00608411
PC17617_c1_g1	5.65052	-2.9077	0.952653	-3.05221	0.0022716	0.013343
PC1148_c0_g1	11.4079	-0.199467	0.315084	-0.63306	0.526695	0.684508
PC1148_c0_g2	98.9674	0.504159	0.255017	1.97696	0.048046	0.135357
PC27512_c2_g1	4.40325	-2.90104	0.864766	-3.35471	0.000794492	0.00578204
PC16518_c0_g2	7.56662	-2.89353	0.682592	-4.23904	2.24477e-05	0.000323289
PC11482_c5_g1	7.12881	-0.09089	0.432433	-0.210183	0.833525	0.905033
PC18183_c3_g1	5.15763	-2.88998	0.900504	-3.20929	0.00133061	0.00874658
PC11483_c0_g1	61.7023	-0.0712176	0.325113	-0.219055	0.826607	0.901017
PC11484_c1_g1	35.3942	-1.11073	1.852	-0.599744	0.548677	0.7029
PC11485_c0_g1	5.87634	-0.874112	0.521766	-1.6753	0.0938761	0.216965
PC25625_c0_g1	16.3069	-2.88881	0.449786	-6.42263	1.33939e-10	9.67544e-09
PC11488_c0_g1	240.57	0.139762	0.200813	0.695983	0.486439	0.649867
PC1140_c35_g1	10.2238	-2.8888	0.809327	-3.56938	0.000357822	0.00305471
PC19066_c0_g1	5.665	-2.88667	0.817116	-3.53276	0.000411248	0.00341704
PC6830_c0_g1	14.0465	-2.88286	0.48168	-5.98501	2.16379e-09	1.18481e-07
PC11494_c2_g2	49.3213	-0.73371	0.427683	-1.71555	0.0862448	0.20493
PC11495_c0_g1	47.1697	-0.464107	0.377959	-1.22793	0.219474	0.387261
PC11497_c0_g1	10.7146	-0.0794145	0.596935	-0.133037	0.894164	0.940614
PC11497_c0_g2	3.37742	-0.28459	1.03965	-0.273735	0.784288	0.873388
PC11498_c1_g1	17.5693	-0.293492	0.446827	-0.656838	0.511285	0.670819
PC11498_c4_g1	21.5119	0.991547	0.579069	1.71231	0.086839	0.205735
PC11499_c0_g1	1311.77	-0.13456	0.28542	-0.471445	0.637323	0.76989
PC128904_c0_g1	9.00508	-2.8821	0.50859	-5.66685	1.45442e-08	6.51705e-07
PC1150_c0_g1	1825.38	-0.428163	0.313145	-1.3673	0.171532	0.327581
PC11500_c0_g1	17.1525	-0.527445	0.281919	-1.87091	0.0613575	0.161276
PC19758_c1_g4	4.02377	-2.88049	1.11271	-2.58871	0.0096337	0.0416228
PC123_c0_g3	4.97084	-2.87652	0.887717	-3.24036	0.00119378	0.00801059
PC11504_c0_g1	48.5867	-1.49478	0.905355	-1.65104	0.0987306	0.224822
PC11505_c0_g1	399.076	-0.32804	0.229756	-1.42778	0.153356	0.30341
PC11506_c0_g1	39.1427	0.34513	0.710764	0.485576	0.627268	0.762489
PC11506_c0_g2	86.6876	-0.505445	0.373674	-1.35264	0.176172	0.333438
PC11506_c1_g1	10.0752	0.42787	0.583163	0.733706	0.463128	0.629069
PC11506_c1_g4	48.6116	0.683655	0.482191	1.41781	0.156246	0.307174
PC9183_c2_g1	3.22287	-2.876	1.09294	-2.63142	0.00850277	0.0377291
PC11508_c0_g1	15.0453	0.458288	0.418273	1.09567	0.273225	0.447259
PC11508_c1_g1	4.93454	-0.621659	0.588016	-1.05722	0.290413	0.465484
PC11508_c2_g1	8.37923	0.251825	0.38156	0.659988	0.509262	0.668893
PC11508_c3_g1	9.091	-0.105805	1.08478	-0.0975364	0.9223	0.95712
PC11509_c0_g1	2498.59	0.0922463	0.102027	0.904138	0.365922	0.541276
PC130221_c0_g1	3.60258	-2.87435	0.83923	-3.42499	0.000614824	0.00472827
PC10628_c3_g1	8.65304	-2.87089	0.580046	-4.94942	7.44333e-07	1.89566e-05
PC1151_c0_g4	81.9686	0.288403	0.183117	1.57496	0.115265	0.249484
PC1151_c0_g5	7.06954	1.40202	0.689511	2.03336	0.0420164	0.122885
PC9647_c1_g1	3.684	-2.86984	0.928416	-3.09111	0.00199409	0.0120703
PC11510_c0_g1	201.368	0.234692	0.144966	1.61894	0.105459	0.234947
PC11511_c0_g1	32.4342	-0.287073	0.237987	-1.20626	0.227718	0.396671
PC11513_c0_g1	6.57854	-1.17999	0.552523	-2.13564	0.0327084	0.102471
PC11513_c2_g2	5.28201	-0.0515312	0.55567	-0.092737	0.926112	0.959185
PC11515_c0_g1	3.58612	-5.02077	3.0684	-1.63628	0.10178	0.229457
PC11515_c0_g2	27.421	-0.620082	0.293555	-2.11232	0.0346593	0.106666
PC11515_c0_g3	9.80567	-0.289769	0.598678	-0.484015	0.628375	0.763216
PC11517_c0_g1	22.5398	0.533774	0.284453	1.87649	0.060588	0.159929
PC11302_c0_g1	12.1843	-2.86689	0.514228	-5.57513	2.47349e-08	1.03864e-06
PC1152_c0_g1	13731.2	-0.162464	0.211676	-0.767512	0.442777	0.611591
PC2011_c1_g1	49.2658	-2.86385	0.600077	-4.77247	1.81979e-06	4.06713e-05
PC11520_c0_g1	19.4007	-0.44452	0.572249	-0.776794	0.43728	0.607054
PC5952_c4_g1	3.26966	-2.86151	1.09973	-2.60201	0.00926778	0.0403997
PC11523_c2_g1	5.33157	-0.403445	0.651068	-0.619667	0.535477	0.692044
PC2546_c1_g1	28.1175	-2.85999	0.682217	-4.1922	2.76264e-05	0.000381228
PC11524_c2_g1	9.16484	0.322636	0.462415	0.697719	0.485353	0.648859
PC11525_c0_g1	16230.1	0.0552673	0.112998	0.489102	0.62477	0.760423
PC9350_c0_g1	8.32152	-2.85986	0.61314	-4.6643	3.09675e-06	6.37464e-05
PC18882_c0_g1	3.5694	-2.85719	0.928638	-3.07676	0.00209265	0.012523
PC35493_c0_g1	4.65261	-2.85259	0.830159	-3.4362	0.000589938	0.00456768
PC1153_c0_g2	344.631	-0.152393	0.110389	-1.38051	0.167431	0.322312
PC1153_c0_g3	115.994	-0.351395	0.505906	-0.694584	0.487316	0.65069
PC1153_c0_g4	25.9959	-0.446303	0.323705	-1.37874	0.167976	0.323157
PC1153_c1_g1	195.385	-0.279263	0.140733	-1.98434	0.0472174	0.133953
PC1153_c2_g1	111.974	0.27222	0.17575	1.5489	0.121405	0.258845
PC14579_c0_g1	7.7883	-2.84828	0.835079	-3.41079	0.000647758	0.00492938
PC1153_c4_g1	19.7597	-0.303334	0.297865	-1.01836	0.308508	0.484391
PC1153_c6_g1	86.3329	-0.716987	0.455751	-1.5732	0.115673	0.250135
PC4257_c0_g2	88.126	-2.84562	0.416811	-6.82713	8.66297e-12	8.08731e-10
PC11530_c0_g2	22.742	-0.0901025	0.477201	-0.188814	0.850238	0.915477
PC11531_c0_g1	213.037	-0.105137	0.152414	-0.68981	0.490314	0.653322
PC11537_c0_g1	97.6254	0.0333072	0.185049	0.179991	0.85716	0.919455
PC13329_c0_g1	4.70701	-2.8448	0.839557	-3.38846	0.000702873	0.0052678
PC23367_c0_g1	5.24403	-2.84187	0.760156	-3.73854	0.000185095	0.00180287
PC18573_c0_g1	6.48937	-2.84103	0.740296	-3.8377	0.000124193	0.00129991
PC11544_c0_g1	265.583	-0.0639904	0.173364	-0.36911	0.712046	0.824113
PC11545_c0_g1	401.177	-0.00754177	0.139239	-0.0541642	0.956804	0.976165
[truncated: 25,532 more rows]
