# Supplementary material for: Natural double-stranded RNA mediates plant defence against insect herbivores
Source: Research Square preprint supplement (doi:10.21203/rs.3.rs-8904826/v1), 2026-02-19
Supplement: Supplementary file 3 [file c428ad66a3e2830f66d2af36.docx]

**Supporting Information**

**Table S1. Primer sequences for PCRs and dsRNA synthesis**

| **Primer/adapter** | **Sequence 5′ → 3′ (IDT, Germany)** | **PCR template** |
| --- | --- | --- |
| dsDcr2* forward | GAATTGTAATACGACTCACTATAGGGAGCTCGATTTCCTAATCACCTGC | *P. chrysocephala* adult cDNA |
| dsDcr2* reverse | GAATTGTAATACGACTCACTATAGGGAGACTGTCTAAATACACTGCTCC | *P. chrysocephala* adult cDNA |
| dsPc-1* forward | GAATTGTAATACGACTCACTATAGGTGACCTGAAAGCATTGCAGAG | *P. chrysocephala* adult cDNA  (see Supporting Dataset 1 for the sequence) |
| dsPc-1* reverse | GAATTGTAATACGACTCACTATAGGAGGTGTAATTCCAACTCTCA | *P. chrysocephala* adult cDNA  (see Supporting Dataset 1 for the sequence) |
| dsPc-2* forward | GAATTGTAATACGACTCACTATAGGGAGAGCCAGTTACAGCCCAACCTAC | Synthetic dsDNA template (IDT, Germany) |
| dsPc-2* reverse | GAATTGTAATACGACTCACTATAGGGAGACGTACGATGTGAAAGTGCTGA | Synthetic dsDNA template (IDT, Germany) |
| dsmGFP* forward | GAATTGTAATACGACTCACTATAGGACCCTGACCTACGGCCTAT | Synthetic dsDNA template (IDT, Germany) |
| dsmGFP* reverse | GAATTGTAATACGACTCACTATAGGTGCCGTCCTCGTACTAGTT | Synthetic dsDNA template (IDT, Germany) |
| Dcr2 RT-qPCR forward | GGCCTGGTGCTCAACCTAAA | *P. chrysocephala* adult cDNA |
| Dcr2 RT-qPCR reverse | TCACGGCTAAGAAAGCTGCA | *P. chrysocephala* adult cDNA |
| *rps4e* RT-qPCR reference forward | GGGTCGTGTTGGTACGGTAA | *P. chrysocephala* adult cDNA |
| *rps4e* RT-qPCR reference reverse | AGTAGCAAACACGTGGCCAT | *P. chrysocephala* adult cDNA |
| dsNode343 A1 forward | TGGCCAAAGGTAAAGATGTTCG | *B. napus* leafcDNA |
| dsNode343 A1 reverse | CGACTAGGAGTGTTATGCCGA | *B. napus* leafcDNA |
| dsNode343 A2 forward | CCAAGCGATCTTTTCGTCGG | *B. napus* leafcDNA |
| dsNode343 A2 reverse | AAAGTTACTCTATTCACCCGTCT | *B. napus* leafcDNA |
| dsNode343 whole forward | ATCCAAAGGAGGTTTCATGGC | *B. napus* leafcDNA |
| dsNode343 whole reverse | AGGCTAGTAGTTCTAGGGGTCG | *B. napus* leafcDNA |
| *B. napus PCR* *actin-7* (EV116054) forward | TGGGTTTGCTGGTGACGAT | *B. napus* leafcDNA |
| *B. napus PCR actin-7* (EV116054) reverse | TGCCTAGGACGACCAACAATACT | *B. napus* leafcDNA |
| *dsGFP* PCR forward* | TGCCATGCCCGAAGGTTATG | *dsGFP* (Eupheria Biotech, Germany) cDNA |
| *dsGFP* PCR reverse* | TCAGCACGCGTCTTGTAGTT | *dsGFP* (Eupheria Biotech, Germany) cDNA |

* See Supporting Dataset 1 for full dsRNA sequence.

**Table S2. Sequences of primers and adapters used for RNA degradome sequencing**

| **Primer/adapter** | **Sequence 5′ → 3′** |
| --- | --- |
| 5′ RNA adaptor | GUUCAGAGUUCUACAGUCCGACGAUCAGCAG |
| RT-primer | CGAGCACAGAATTAATACGACTTTTTTTTTTTTTTTTTT |
| 5′ adaptor | GTTCAGAGTTCTACAGTCCGAC |
| 3′ adaptor | CGAGCACAGAATTAATACGACT |
| dsDNA top | TGGAATTCTCGGGTGCCAAGG |
| dsDNA bottom | CCTTGGCACCCGAGAATTCCA |
| Final 5′ PCR primer | AATGATACGGCGACCACCGAGATCTACACGTTCAGAGTTCTACAGTCCGA |
| Final 3′ PCR primer | CAAGCAGAAGACGGCATACGAGATACATCGGTGACTGGAGTTCAGACGTGTGCTCTTCCGATCT |

**Table S3. BLAST results showing homologous plastid sequences of dsNode343 from *Brassica napus* in other plant species based on NCBI reference genomes**

| **Description** | **Max score** | **Total score** | **Query cover** | **E value** | **Percent identity** | **Accession length** | **NCBI accession** |
| --- | --- | --- | --- | --- | --- | --- | --- |
| Subject: *B. napus* dsNode343 | 2809 | 2809 | 100% | 0.0 | 100.00% | 1521 | XM_048772801.1 |
| *A. thaliana* dsNode343 | 1703 | 1703 | 85% | 0.0 | 90.53% | 1303 | LR881471.1 |
| *H. lupulus* dsNode343 | 595 | 595 | 52% | 3e-173 | 80.69% | 919 | OY720658.1 |
| *S. tuberosum* dsNode343 | 427 | 427 | 22% | 1e-122 | 89.88% | 934 | OM638079.1 |

**
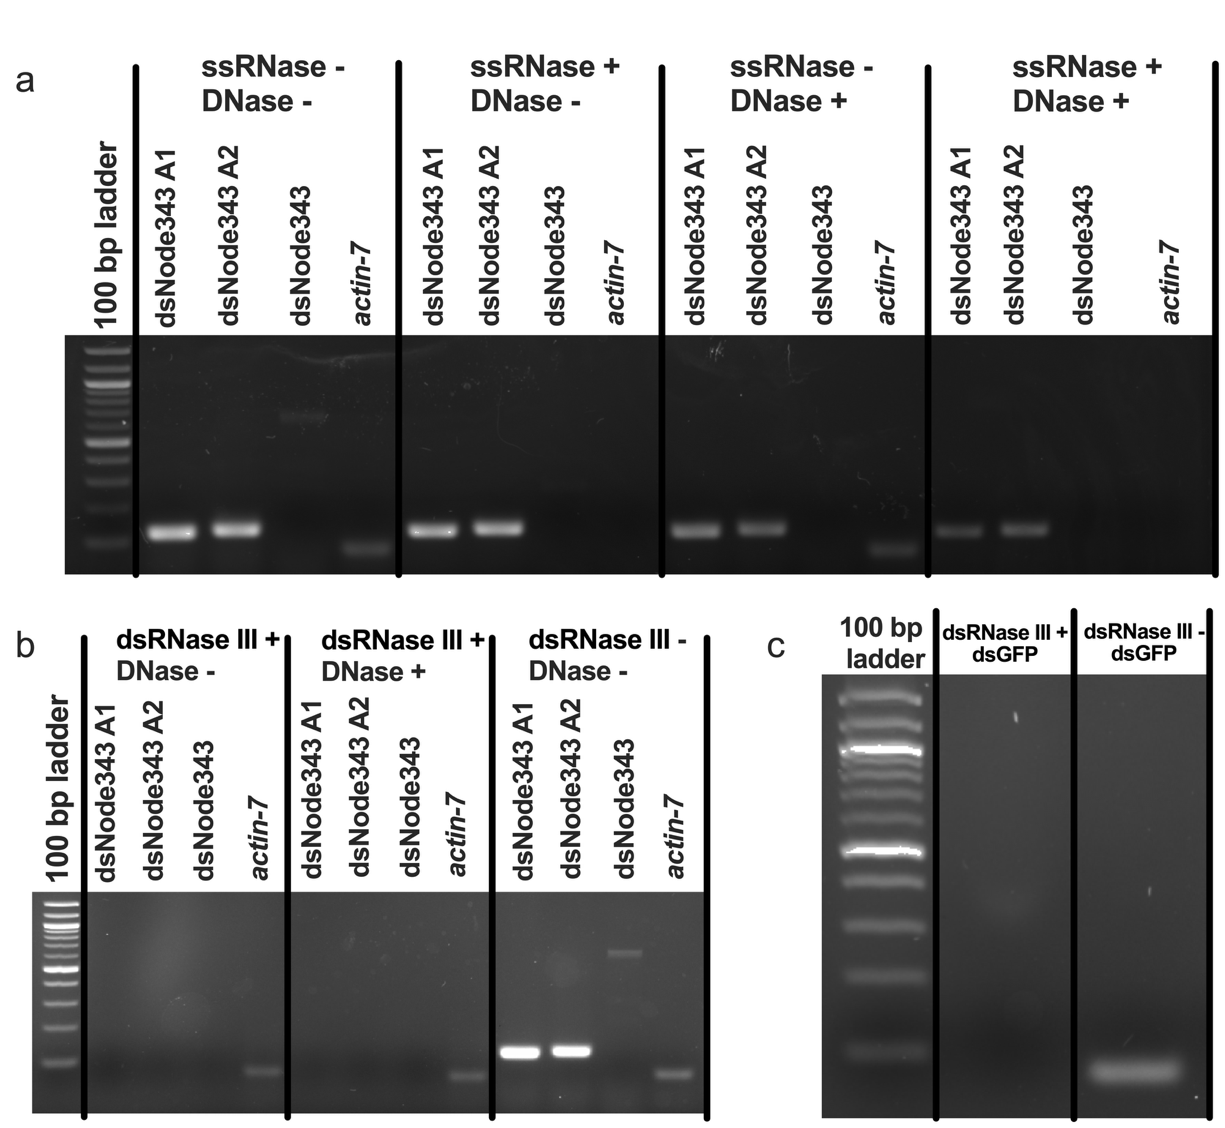
**

**Figure S1. PCR-based confirmation of dsRNA status of dsNode343 fragments in *B. napus*.**

**a)** Total RNA was extracted from *B. napus* leaves and incubated with ssRNase (RNase If, NEB) + DNase, only ssRNase, or only DNase, converted to cDNA using RevertAid cDNA Synthesis Kit (Thermo Scientific, Germany) in 50% DMSO and amplified (25 PCR cycles) using primers specific for dsNode343 A1 (133 bp amplicon), dsNode343 A2 (136 bp), the larger dsNode343 (728 bp) region containing both A1 and A2, or reference gene *actin-7* (62 bp). The sequences of the dsNode343 A1 and A2 bands were confirmed by Sanger sequencing (Supporting Dataset 4).

**b)** Total RNA from *B. napus* leaves was incubated with ShortCut RNase III (dsRNase III), ShortCut RNase III (dsRNase III) + DNase, or mock treatment, converted to cDNA as above, and amplified (25 PCR cycles) using primers specific for dsNode343 A1, dsNode343 A2, the larger dsNode343 region, or *actin-7*.

**c)** dsGFP synthesized *in vitro* (Eupheria Biotech, Germany) was incubated with dsRNase III or mock treatment, converted to cDNA, and amplified (25 PCR cycles) using primers specific for GFP (75 bp) to confirm the dsRNA-specificity of dsRNase III treatment.

The gel images are representative of three independent replicates.

**
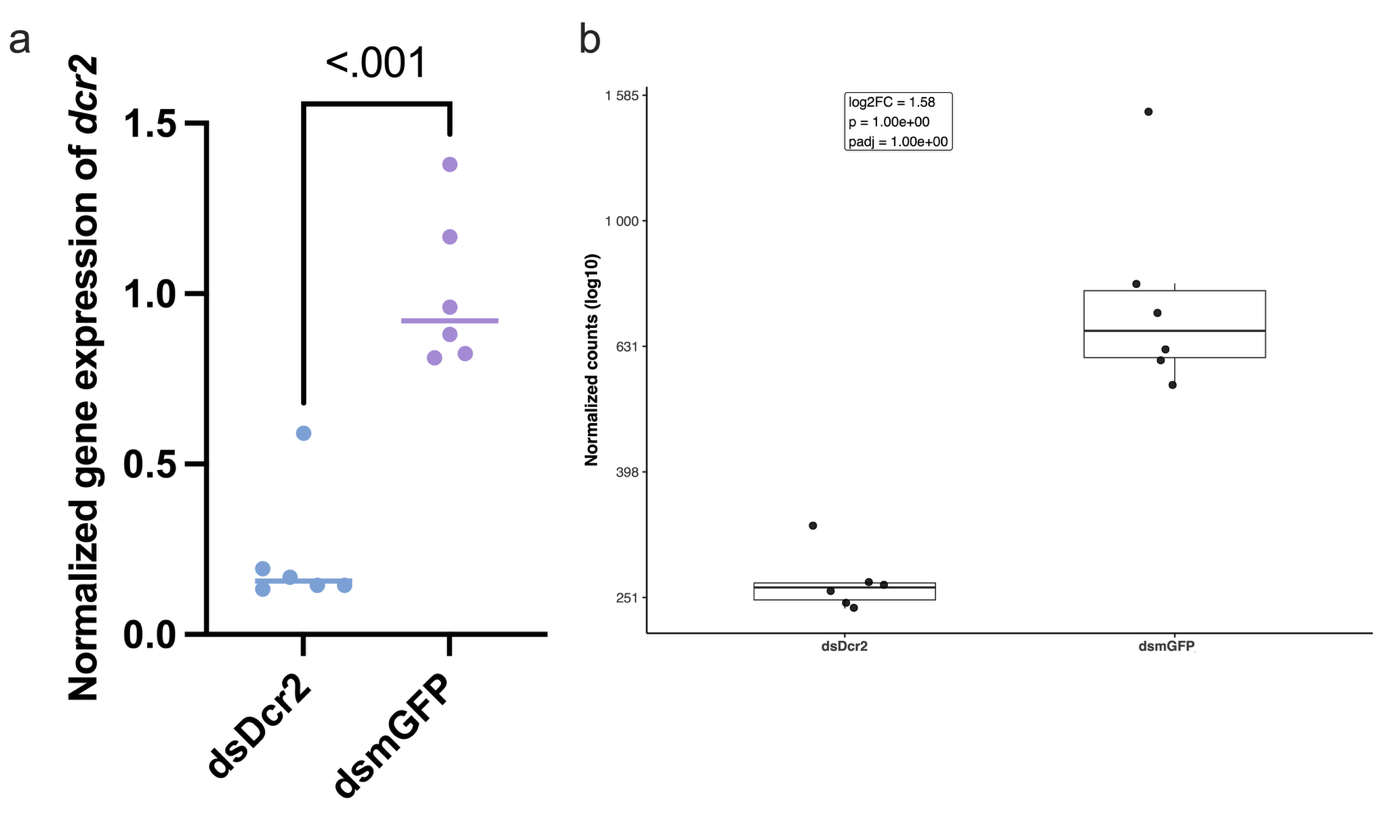
**

**Figure S2. Confirmation that dsDcr2 feeding triggered the knockdown of *dicer-2* (DN10673_c0_g1) in *P. chrysocephala* adults.**

**a)** Confirmation by RT-qPCR using the Luna Universal One-Step RT-qPCR Kit (see Table S1 for primers). P value by t-test (n = 6).

**b)** Confirmation by RNA-seq (n = 6). P value by DESeq2.


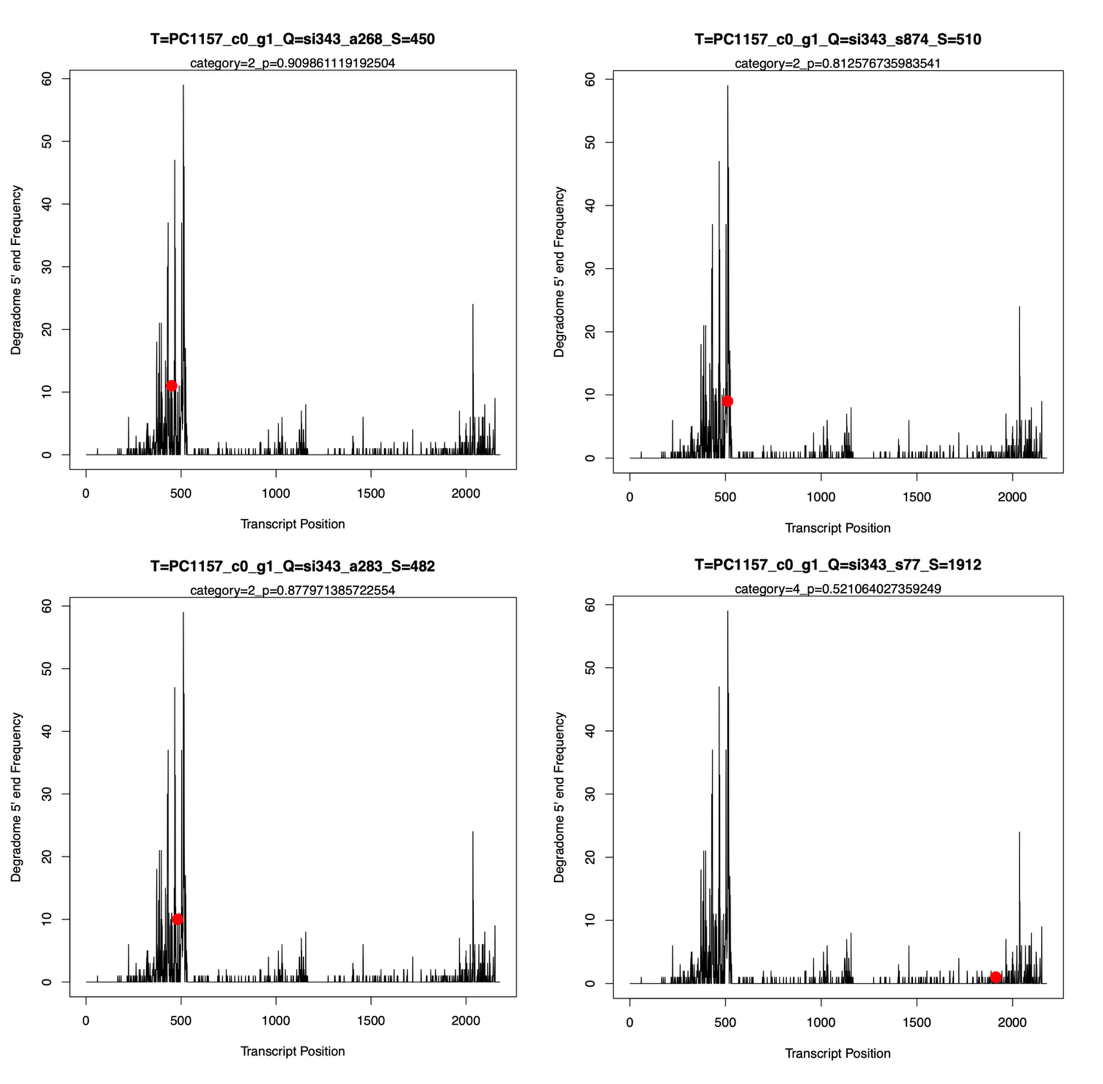


**Figure S3. Other dsNode343-derived siRNAs associated with cleavage of the *cortactin* transcript.** CleaveLand4 5′ end degradome frequency plot of the *cortactin* transcript (same frequency data in all plots) is shown with the red dots indicating different complementary dsNode343-derived siRNAs.
